# Supplementary material for: Comprehensive Identification of Immunodominant Proteins of Brucella abortus and Brucella melitensis Using Antibodies in the Sera from Naturally Infected Hosts
Source: Int J Mol Sci. 2016 Apr 30;17(5):659. doi: 10.3390/ijms17050659 (PMC4881485; doi:10.3390/ijms17050659)
Supplement: Supplementary file 1 [file ijms-17-00659-s001.xlsx]

## Sheet: LTQ identification
Supplementary Table 1A: List of Proteins identified: S.No, Uniprot ID (as obtained from the database: uniprot.org), protein name/description (as in the database), Gene name, Log2 normalised label free quantification intensities (quantification, NaN-not a number for those values less than dected level), T-test significance (+ significant, P<0.05), False Discovery Rate (FDR: + significant, (a Benja…
S.No	Uniprot ID	Protein name/ Description	Gene name	Log2 normalised label free quantification intensities														T-test Significant	False Discovery Rate (FDR)	Score	Intensity	MS/MS Count	.-Log t-test p value	t-test Difference	t-test p value
				B. melitensis 09RB5232 (M)							B. abortus 09RB5689 (A)
				Expt. 1	Expt. 2	Expt. 3	Expt. 4	Expt. 5	Expt. 6	Count	Expt. 7	Expt. 8	Expt. 9	Expt. 10	Expt. 11	Expt. 12	Count
1	F2HQD9	Glycine betaine ABC transporter substrate-binding protein	BM28_A0236	18.5096	19.5203	19.7746	19.2384	18.8932	17.8435	6	24.231	24.0482	24.0459	23.5007	23.5326	23.1933	6	+	+	323.31	280120000	82	7.28092	-4.79533	5.23694e-08
2	Q2YP67	Bacterial extracellular solute-binding protein, family 1	BAB1_0238	24.6389	24.5875	24.7572	24.7402	24.6095	24.5677	6	22.9024	23.0847	22.7997	22.9905	22.9376	23.1979	6	+	+	323.31	1351400000	288	9.65619	1.66469	2.20705e-10
3	Q2YP93	Uncharacterized protein	BAB1_0243	20.8094	22.4686	20.6641	21.7129	21.952	20.7457	6	21.6195	20.4628	20.8908	20.543	21.0718	20.144	6			55.077	120950000	51	0.857164	0.603456	0.138943
4	Q2YP90	Short-chain dehydrogenase/reductase SDR:Glucose/ribitol dehydrogenase	BAB1_0246	20.5008	NaN	21.1606	18.3208	NaN	18.5032	4	18.7905	NaN	18.5615	NaN	NaN	19.709	3			26.218	46537000	12	0.305135	1.36905	0.495296
5	F2HQF6	Fumarylacetoacetate hydrolase domain-containing protein 2	BM28_A0253	26.0117	27.288	25.7257	26.8748	27.4751	27.6711	6	26.5019	26.3285	27.0434	27.0695	27.1136	26.4511	6			323.31	6404000000	534	0.0926869	0.0897404	0.807817
6	Q2YPC1	Translation initiation factor IF-1	infA BAB1_0282	25.0515	26.0766	25.0829	25.3639	25.8815	25.3044	6	25.6906	25.7288	25.8309	25.7346	25.4899	24.9461	6			323.31	2650600000	216	0.203914	-0.110036	0.625296
7	F2HQJ0	Histidinol dehydrogenase (HDH) (EC 1.1.1.23)	hisD BM28_A0287	22.623	22.1102	23.406	22.52	22.0754	21.8601	6	20.2029	20.7848	20.2749	20.6597	20.2216	21.5753	6	+	+	159.68	230970000	73	3.75391	1.81255	0.000176236
8	Q2YPB7	Uncharacterized protein	BAB1_0286	18.6612	17.9688	19.0957	18.2453	18.107	NaN	5	18.5476	19.1813	18.8243	NaN	18.7751	18.7624	5			5.2359	20192000	9	0.0969316	-0.335454	0.79996
9	Q2YPB6	UDP-N-acetylglucosamine 1-carboxyvinyltransferase (EC 2.5.1.7) (Enoylpyruvate transferase) (UDP-N-acetylglucosamine enolpyruvyl transferase) (EPT)	murA BAB1_0287	20.8261	20.0374	20.8868	19.6465	20.0096	20.3439	6	21.139	21.2533	20.2449	21.3767	20.5369	21.2622	6	+		114.6	122750000	75	1.47149	-0.67713	0.0337682
10	Q2YPD7	Urease subunit gamma 1 (EC 3.5.1.5) (Urea amidohydrolase subunit gamma 1)	ureA1 ureA ureA-1 BAB1_0298	21.5785	22.431	21.9289	22.4299	22.6483	22.68	6	18.3906	18.7353	NaN	NaN	19.1229	NaN	3	+	+	44.108	101450000	34	3.28384	6.30296	0.000520186
11	Q2YPD5	Urease subunit alpha 1 (EC 3.5.1.5) (Urea amidohydrolase subunit alpha 1)	ureC1 BAB1_0300	20.6916	20.7438	22.2263	21.6439	21.9316	19.9074	6	18.883	NaN	18.9487	18.7075	18.132	18.0181	5	+	+	56.542	70719000	35	2.346	3.54089	0.00450821
12	Q2YPD2	Urease accessory protein UreG 1	ureG1 BAB1_0303	22.687	23.3701	22.1632	22.4463	23.1485	22.8328	6	20.7153	20.3063	19.157	21.9227	20.1583	21.5082	6	+	+	120.95	176220000	69	3.15799	2.14668	0.000695046
13	F2HQL1	Phenylhydantoinase	hydA BM28_A0308	NaN	18.1928	17.9302	19.5169	18.4271	18.3202	5	NaN	NaN	NaN	NaN	NaN	NaN	0	+	+	26.908	46306000	30	3.17074	4.38953	0.000674933
14	F2HQL2	Allantoate amidohydrolase	BM28_A0309	23.251	24.1501	23.4941	23.783	23.7541	24.2763	6	20.0845	20.4376	21.0004	21.2465	21.0102	21.4652	6	+	+	126.25	660720000	201	6.19882	2.91072	6.32673e-07
15	Q2YNQ5	Uncharacterized protein	BAB1_0948	17.37	17.4999	18.9214	17.212	NaN	NaN	4	NaN	NaN	NaN	NaN	NaN	NaN	0	+	+	30.94	7080900	2	1.91921	3.02722	0.0120446
16	Q2YNQ4	ATP/GTP-binding site motif A (P-loop):ABC transporter:AAA ATPase	BAB1_0949	21.486	20.2885	21.0521	21.24	20.7383	19.6463	6	18.9548	18.9785	19.0768	18.8173	18.9809	19.4507	6	+	+	128.71	84005000	59	3.78583	1.69871	0.000163747
17	F2HQM5	Uncharacterized protein	BM28_A0954	22.6355	24.4779	22.412	23.1862	24.1674	23.9946	6	NaN	NaN	NaN	NaN	NaN	NaN	0	+	+	86.722	306430000	58	10.3074	10.269	4.92677e-11
18	Q2YNS5	Heavy metal transport/detoxification protein:Heavy metal binding	BAB1_0960	20.2194	21.3947	19.9852	20.9397	21.0333	20.938	6	20.7895	19.2841	19.7409	20.2368	20.7208	20.5946	6			139.32	112170000	54	0.845417	0.523936	0.142752
19	Q2YNS3	SAM (And some other nucleotide) binding motif:Protein-L-isoaspartate(D-aspartate) O-methyltransferase:Site-specific DNA-methy (EC 2.1.1.77)	BAB1_0962	20.6471	19.5233	20.5071	NaN	20.1169	20.102	5	20.4919	20.6598	20.8017	20.5997	20.4118	20.9308	6			85.962	92260000	52	0.709587	-1.63154	0.19517
20	F2HQN2	Uncharacterized protein	BM28_A0961	17.8732	18.669	18.0896	18.4794	17.861	18.4504	6	NaN	NaN	NaN	NaN	NaN	NaN	0	+	+	37.022	15964000	16	11.1822	5.02709	6.57319e-12
21	F2HQQ4	Porin	BM28_A0983	23.8099	25.1615	23.6561	24.9949	25.5355	25.4169	6	NaN	NaN	NaN	20.2407	NaN	22.8136	2	+	+	323.31	960710000	137	3.16353	8.78009	0.000686226
22	Q2YQ75	TatD-related deoxyribonuclease (EC 3.1.21.-)	BAB1_1015	20.3226	20.4968	19.398	20.6275	20.8203	21.2943	6	21.1525	21.3108	21.5051	21.4601	21.4583	21.1705	6	+	+	48.309	100980000	50	2.02225	-0.849669	0.0095006
23	F2HQS8	Beta-lactamase domain-containing protein	BM28_A1007	19.7151	21.8633	19.9802	20.7587	21.5475	21.4005	6	22.1682	22.546	22.4213	21.8916	21.9841	22.4604	6	+	+	63.674	194790000	76	2.3445	-1.36772	0.00452373
24	F2HQT4	Glutamine synthetase (EC 6.3.1.2)	glnA BM28_A1013	24.163	23.1992	24.2277	23.3445	22.9748	21.8063	6	23.0458	23.3667	22.6797	23.2754	22.8436	22.9928	6			248.21	640080000	162	0.283858	0.251923	0.520165
25	Q2YQ66	Nitrogen regulatory protein P-II:P-II protein urydylation site	glnB BAB1_1024	23.0075	25.0402	23.464	23.5739	24.5728	24.3068	6	24.26	24.9749	23.7731	24.4868	24.5206	23.731	6			159.18	803840000	127	0.355949	-0.296858	0.440606
26	Q2YRE7	Uncharacterized protein	BAB1_1734	22.1288	23.8549	22.2125	23.0253	23.2788	23.085	6	23.3403	23.5375	23.3101	23.4035	23.2871	22.9072	6			106.21	509190000	220	0.651694	-0.366747	0.223001
27	Q2YRE3	Uncharacterized protein	BAB1_1738	21.4019	22.63	21.3883	22.1065	21.2628	20.9924	6	22.537	22.721	20.8582	22.1885	22.0749	22.695	6			48.024	481790000	66	0.74752	-0.548778	0.178846
28	F2HQV0	Glyceraldehyde-3-phosphate dehydrogenase (EC 1.2.1.-)	BM28_A1729	24.2992	23.0305	24.528	23.8742	23.2933	22.8958	6	25.372	24.8754	24.553	24.7665	24.7813	24.7233	6	+	+	323.31	2134400000	407	2.57379	-1.19173	0.00266815
29	Q2YRD9	Phosphoglycerate kinase (EC 2.7.2.3)	pgk BAB1_1742	22.525	21.492	22.769	21.979	21.1549	20.3002	6	21.2645	20.7903	20.7341	20.9106	20.9353	21.3837	6			125.41	236260000	100	0.990495	0.700256	0.102213
30	Q2YRZ5	Uncharacterized protein	BAB1_1749	21.8298	23.4126	21.4891	22.9901	21.9863	22.2855	6	21.2506	21.8058	21.7441	21.4895	21.0842	21.5842	6	+		71.405	293380000	119	1.591	0.839191	0.0256448
31	Q2YRZ3	Uncharacterized protein	BAB1_1751	21.4447	23.337	21.6773	22.5433	22.6327	23.364	6	23.1173	22.3008	22.9618	22.4667	22.5984	20.4551	6			83.04	329760000	63	0.137691	0.183137	0.728298
32	Q2YRZ2	Uncharacterized protein	BAB1_1754	23.9973	25.3941	24.1733	24.7617	25.1795	25.1216	6	25.8494	25.8509	25.3023	25.4303	25.9699	25.6504	6	+	+	269.64	1956100000	220	2.25552	-0.904296	0.00555234
33	Q2YRY9	N5-carboxyaminoimidazole ribonucleotide mutase (N5-CAIR mutase) (EC 5.4.99.18) (5-(carboxyamino)imidazole ribonucleotide mutase)	purE BAB1_1757	21.6576	20.6628	21.4355	NaN	21.1415	NaN	4	21.0007	20.9295	21.1477	21.2868	21.0269	21.2849	6			16.802	150180000	33	0.790014	-2.55985	0.162176
34	F2HQW6	N5-carboxyaminoimidazole ribonucleotide synthase (N5-CAIR synthase) (EC 6.3.4.18) (5-(carboxyamino)imidazole ribonucleotide synthetase)	purK BM28_A1745	21.1129	20.4451	21.0364	21.2529	20.78	19.9196	6	20.5239	20.4898	20.529	20.5566	21.0047	20.5106	6			52.635	84125000	55	0.305103	0.155378	0.495333
35	Q2YRY7	50S ribosomal protein L36	rpmJ BAB1_1759	19.4458	19.9826	20.1211	20.6069	20.2984	20.4509	6	20.0953	21.0251	21.0844	19.9981	20.5203	20.525	6			13.523	84785000	19	0.827029	-0.390407	0.148926
36	F2HQW9	Pyruvate kinase (EC 2.7.1.40)	BM28_A1748	22.9831	21.1542	23.1419	21.6542	21.1986	20.3197	6	19.913	20.4444	19.7726	19.8388	19.9663	20.5307	6	+	+	119.68	207140000	70	2.25774	1.66432	0.00552406
37	Q2YRY3	N-formylglutamate amidohydrolase	BAB1_1763	21.1959	20.0192	22.0962	20.5177	20.3405	19.6109	6	21.6409	21.4486	20.9644	21.1122	21.4229	21.4625	6			53.42	146740000	74	1.04897	-0.711848	0.0893376
38	Q2YLX2	UPF0335 protein BAB1_1765	BAB1_1765	23.9673	24.9406	24.1174	23.8213	24.628	24.4996	6	24.951	25.6371	25.0519	25.1216	24.8884	24.5684	6	+	+	323.31	1428400000	119	1.96343	-0.70739	0.0108786
39	F2HQX5	Uncharacterized protein	BM28_A1754	20.5619	22.1786	21.2708	20.4396	21.2455	22.7645	6	21.3742	20.9685	21.8551	20.4817	21.057	21.2933	6			130.41	178030000	47	0.237369	0.238478	0.578937
40	F2HQX7	Thiamine transporter substrate binding subunit	tbpA BM28_A1756	25.7169	27.3446	25.6255	26.3163	26.973	26.9239	6	25.7025	25.4158	25.7741	25.5439	25.7463	25.5186	6	+	+	323.31	3091000000	547	1.81966	0.866488	0.0151476
41	F2HQY0	Peptidase M48	BM28_A1759	20.2726	21.3582	20.9567	20.2397	20.3778	20.5602	6	20.714	21.0023	20.0231	20.2679	20.3998	20.3734	6			66.891	76616000	35	0.308741	0.164145	0.491201
42	Q2YLE0	7Fe ferredoxin:4Fe-4S ferredoxin, iron-sulfur binding domain	fdxA BAB1_1778	22.5426	24.5085	22.3754	23.2035	24.0398	24.1385	6	25.1399	24.5358	24.9279	24.5024	24.8103	24.4152	6	+	+	178.63	1146700000	135	2.08228	-1.25386	0.00827405
43	Q2YLD7	DEAD/DEAH box helicase:Helicase, C-terminal:ATP/GTP-binding site motif A (P-loop):Aldehyde dehydrogenase	BAB1_1781	20.5077	NaN	20.2516	20.3791	19.6664	19.2752	5	NaN	NaN	NaN	NaN	NaN	NaN	0	+	+	41.144	36031000	17	3.22495	5.67168	0.000595729
44	Q2YLD4	Uncharacterized protein	BAB1_1784	22.6951	23.5607	23.3214	22.6289	23.2235	22.8659	6	22.6303	23.1284	22.2713	22.3776	22.4399	22.7311	6	+		159.59	411080000	128	1.34008	0.452813	0.0457007
45	F2HQZ1	50S ribosomal protein L32	rpmF BM28_A1770	20.4511	21.3131	20.5239	20.8703	20.7561	20.7634	6	21.9786	21.5635	21.8679	21.4858	21.6878	20.9543	6	+	+	73.324	144060000	47	2.73169	-0.809977	0.00185487
46	Q2YLG4	4-hydroxy-3-methylbut-2-en-1-yl diphosphate synthase (flavodoxin) (EC 1.17.7.3) (1-hydroxy-2-methyl-2-(E)-butenyl 4-diphosphate synthase)	ispG BAB1_1788	19.4	19.132	19.4899	NaN	19.2318	NaN	4	18.1461	NaN	18.6718	18.8233	NaN	18.7234	4			13.919	23907000	12	0.105084	0.481505	0.785084
47	Q2YLG3	Eukaryotic thiol (Cysteine) protease:Short-chain dehydrogenase/reductase SDR:Glucose/ribitol dehydrogenase (EC 1.1.1.30)	BAB1_1789	21.2688	19.3903	20.8176	20.0363	19.7185	19.4386	6	18.6879	18.9265	18.5533	NaN	19.1374	NaN	4	+		21.872	59068000	16	1.5557	3.15749	0.0278161
48	Q2YLG1	Pyruvate carboxylase (EC 6.4.1.1)	pyc BAB1_1791	21.7059	20.477	22.9612	20.9526	20.6296	19.8393	6	20.5004	18.8936	19.279	NaN	NaN	18.3051	4	+	+	113.69	146290000	53	1.72345	3.86127	0.0189037
49	F2HQZ8	Leu/Ile/Val-binding protein	BM28_A1777	20.7645	NaN	NaN	21.8099	21.023	20.7749	4	22.1082	21.315	21.7884	22.3593	24.0149	22.279	6	+		17.866	112650000	22	1.31552	-3.8454	0.0483594
50	F2HR00	Leu/Ile/Val-binding protein	BM28_A1779	22.9404	23.4349	22.2831	NaN	23.456	23.442	5	NaN	NaN	22.9932	NaN	NaN	NaN	1	+	+	66.792	349110000	50	1.75919	6.62054	0.0174104
51	F2HR03	ABC transporter-like protein	BM28_A1782	20.2618	19.4007	20.1362	20.2412	19.0458	19.1686	6	NaN	NaN	NaN	NaN	NaN	NaN	0	+	+	46.731	33922000	19	10.1298	6.49906	7.4162e-11
52	F2HR12	ATP synthase subunit beta (EC 3.6.3.14) (ATP synthase F1 sector subunit beta) (F-ATPase subunit beta)	atpD BM28_A1791	25.3584	24.4082	25.7994	25.3235	24.4744	23.911	6	24.0761	24.2215	24.1859	23.9087	24.1466	24.1829	6	+		323.31	2290600000	579	1.5376	0.75888	0.0290001
53	Q2YLI6	ATP synthase gamma chain (ATP synthase F1 sector gamma subunit) (F-ATPase gamma subunit)	atpG BAB1_1808	18.8239	17.9768	18.6897	NaN	17.8625	NaN	4	NaN	NaN	NaN	NaN	NaN	NaN	0	+	+	28.035	14828000	14	1.97135	3.41882	0.0106821
54	Q2YLI1	Probable transaldolase (EC 2.2.1.2)	tal BAB1_1813	25.1464	25.5643	25.0037	25.3779	25.8956	26.0021	6	25.0292	24.9598	24.9483	25.218	25.1543	25.1748	6	+		323.31	2054500000	425	1.47011	0.4176	0.0338755
55	Q2YPF2	Arginine/ornithine transport operon protein aot	BAB1_0317	21.8147	19.5285	21.4953	19.8788	19.7791	19.8893	6	NaN	NaN	NaN	NaN	NaN	NaN	0	+	+	22.966	54290000	25	8.18059	7.1876	6.59804e-09
56	Q2YPE7	Secretion protein HlyD	BAB1_0322	20.4034	20.1421	20.2834	20.4195	19.9933	19.416	6	20.3958	20.7164	20.0695	21.2707	21.4101	21.4796	6	+	+	33.043	76974000	29	1.68834	-0.780735	0.0204956
57	Q2YPH3	Acetylornithine aminotransferase (ACOAT) (EC 2.6.1.11)	argD BAB1_0331	19.9379	18.3081	19.48	18.6606	17.7902	NaN	5	18.4831	19.3421	18.414	18.9524	18.4984	18.7091	6			81.943	39257000	26	0.373333	-0.835394	0.423318
58	Q2YPG8	dCTP deaminase (EC 3.5.4.13)	BAB1_0336	21.7787	19.8071	22.5359	21.2343	19.8364	19.0624	6	19.2384	19.2929	19.0632	18.7975	19.0225	19.1292	6	+	+	42.779	105550000	20	1.81739	1.61853	0.0152268
59	Q2YPG1	Uncharacterized protein	BAB1_0343	21.4516	21.8907	21.1389	20.7774	22.1308	20.9501	6	22.132	22.1419	21.7382	22.2855	21.9006	21.9699	6	+	+	147.32	176360000	127	1.68008	-0.638093	0.0208893
60	Q2YPG0	Proline iminopeptidase (EC 3.4.11.5)	pip BAB1_0344	20.5488	19.1458	19.9022	19.7619	19.1245	NaN	5	19.2119	19.0412	18.8593	19.3039	18.9445	19.07	6			9.4109	43577000	16	0.162237	-0.456262	0.688277
61	F2HR64	Uncharacterized protein	BM28_A0355	21.5583	22.0158	21.7256	21.7545	22.3182	22.2063	6	22.2031	22.2206	22.1354	22.3215	22.037	21.5986	6			109.12	212810000	81	0.451244	-0.156258	0.353798
62	F2HR76	Carboxynorspermidine dehydrogenase	BM28_A0367	23.3242	22.2016	22.9865	21.8551	21.0259	21.0087	6	20.9958	21.3313	19.5302	21.2449	19.765	20.4232	6	+	+	148.62	184080000	68	1.8791	1.51861	0.0132098
63	Q2YPK6	Uncharacterized protein BAB1_0366	BAB1_0366	19.0201	20.3903	18.4032	20.0922	20.2044	20.4639	6	NaN	NaN	NaN	NaN	NaN	NaN	0	+	+	15.2	25924000	21	8.43834	6.55236	3.64468e-09
64	F2HR80	Invasion associated locus B family protein	BM28_A0371	26.8157	27.0621	27.2813	26.6509	27.312	27.3622	6	27.4591	27.1217	27.5004	27.4541	27.318	27.4377	6	+		323.31	8301600000	426	1.33133	-0.301166	0.0466305
65	Q2YPJ9	Polysaccharide deacetylase (EC 3.5.1.-)	BAB1_0375	19.2559	18.3503	20.3232	18.8436	NaN	NaN	4	17.8492	NaN	NaN	18.0271	NaN	NaN	2			12.067	21383000	5	0.770769	2.41276	0.169524
66	F2HRA0	Ribose-5-phosphate isomerase A (EC 5.3.1.6) (Phosphoriboisomerase A)	rpiA BM28_A1019	22.0176	21.6909	22.6897	21.4936	21.9017	21.5138	6	22.1069	22.3582	21.6112	21.5398	21.8753	22.0084	6			93.77	219580000	82	0.0517674	-0.0320937	0.887631
67	F2HRA1	Uncharacterized protein	BM28_A1020	25.3821	26.249	25.1951	25.7947	26.264	25.9372	6	26.0488	26.4536	26.1636	26.3753	26.311	26.0608	6	+		323.31	3870700000	437	1.30637	-0.431855	0.0493892
68	F2HRA2	Glutathione reductase	BM28_A1021	18.0637	NaN	18.8958	18.5389	17.526	NaN	4	24.5601	24.7908	24.4147	24.3834	24.2797	23.7513	6	+	+	259.51	373520000	114	4.50736	-7.78929	3.10915e-05
69	F2HRA3	3-deoxy-7-phosphoheptulonate synthase	BM28_A1022	21.4185	20.8442	22.1096	20.1713	21.2032	19.5081	6	19.6756	20.0434	19.1819	19.2678	19.371	19.3583	6	+	+	81.528	80453000	26	2.22701	1.39284	0.00592914
70	Q2YQ57	Nitrilase/cyanide hydratase and apolipoprotein N-acyltransferase:NAD+ synthase (EC 6.3.5.1)	BAB1_1033	20.3232	NaN	19.8463	19.8872	19.5643	NaN	4	NaN	19.3935	NaN	NaN	NaN	NaN	1			65.378	37945000	22	1.1063	3.43293	0.0782895
71	Q2YQ54	Malic oxidoreductase:Phosphate acetyl/butaryl transferase (EC 1.1.1.39)	BAB1_1036	22.9158	21.1425	22.6833	21.6223	20.58	19.663	6	19.9077	20.2926	20.093	20.2081	19.9708	20.4059	6	+		139.31	173690000	65	1.50698	1.28813	0.0311188
72	Q2YQ49	Uncharacterized protein	BAB1_1041	20.7182	20.455	21.151	20.1998	19.7005	19.7574	6	20.2723	20.469	20.1835	19.9982	20.0083	20.1081	6			71.499	69983000	46	0.276463	0.157062	0.529099
73	Q2YQ44	Uncharacterized protein	BAB1_1048	18.4742	18.0065	19.1676	19.2563	NaN	NaN	4	19.5959	21.6732	20.0691	20.5927	19.6349	20.3847	6	+	+	13.639	39824000	17	1.74053	-3.43763	0.0181747
74	Q2YQ34	Proline-rich region:Proline-rich extensin	BAB1_1058	20.8988	19.4098	22.2312	20.4502	20.1813	20.504	6	19.2654	18.803	18.9554	18.972	19.0608	18.9883	6	+	+	57.811	72264000	29	2.7031	1.60505	0.00198105
75	F2HRD9	UspA domain-containing protein	BM28_A1058	24.8633	23.1729	24.9867	23.6035	23.4134	23.0668	6	22.8197	22.6211	22.2743	22.7918	22.7285	23.1664	6	+	+	253.89	810610000	225	1.90152	1.11746	0.0125453
76	Q2YQ18	Sulfurtransferase	BAB1_1075	23.0844	22.8367	23.4472	23.0183	22.7488	22.3717	6	23.2458	23.2213	23.2346	23.0437	23.3213	23.2291	6			151.73	586730000	203	1.10574	-0.298077	0.0783908
77	Q2YQ16	Acetyl-CoA hydrolase/transferase	BAB1_1077	23.1103	21.4658	22.4213	21.9519	21.831	21.749	6	21.318	20.0767	20.8149	21.6406	21.4338	21.2699	6	+	+	42.956	208960000	61	1.85979	0.99594	0.0138105
78	F2HRF2	Zinc-binding alcohol dehydrogenase family protein	BM28_A1071	21.7605	23.416	20.9322	21.8823	22.5871	22.5922	6	NaN	NaN	NaN	NaN	NaN	NaN	0	+	+	28.769	106450000	35	9.7285	8.98504	1.86851e-10
79	Q2YQ10	Nitrilotriacetate monooxygenase component B (EC 1.14.13.-)	BAB1_1090	21.1148	23.0797	20.9598	21.5072	21.9309	21.4724	6	21.7017	22.0254	21.6541	21.8316	22.2466	21.3589	6			97.114	150630000	72	0.14432	-0.125598	0.717265
80	F2HRG9	Phosphoribosyl-AMP cyclohydrolase (PRA-CH) (EC 3.5.4.19)	hisI BM28_A1088	20.6888	22.259	20.3558	21.3877	21.7633	22.0926	6	22.4615	21.739	22.0655	21.7509	22.0788	22.1368	6			85.22	207580000	98	1.0269	-0.614202	0.0939933
81	Q2YLH9	Leucine--tRNA ligase (EC 6.1.1.4) (Leucyl-tRNA synthetase) (LeuRS)	leuS BAB1_1815	20.5068	19.4008	21.5085	19.4028	19.3771	NaN	5	NaN	18.7515	18.7909	19.0481	18.974	19.1515	5			95.769	66102000	33	0.249345	0.913333	0.56319
82	F2HRI2	Uncharacterized protein	BM28_A1804	NaN	NaN	18.8943	NaN	NaN	NaN	1	19.3658	18.6871	19.8785	18.7661	NaN	18.9754	5	+	+	5.4819	23872000	14	1.79359	-3.98976	0.0160847
83	Q2YLH0	Bifunctional purine biosynthesis protein PurH [Includes: Phosphoribosylaminoimidazolecarboxamide formyltransferase (EC 2.1.2.3) (AICAR transformylase); IMP cyclohydrolase (EC 3.5.4.10) (ATIC) (IMP synthase) (Inosinicase)]	purH BAB1_1824	21.6823	20.3696	22.2158	21.5436	20.6318	19.5229	6	19.8561	20.192	20.0025	20.022	20.0143	20.2791	6	+		139.98	134750000	45	1.33256	0.933334	0.0464983
84	Q2YLG8	Uncharacterized protein	BAB1_1828	18.5017	NaN	18.807	17.917	NaN	NaN	3	17.565	18.1722	17.4741	17.715	NaN	NaN	4			30.259	13084000	7	0.102853	-0.415098	0.789127
85	Q2YLK8	LemA family	BAB1_1830	23.2734	22.5957	23.8083	22.5756	22.0169	21.868	6	22.3426	22.4482	22.1279	21.7364	22.1561	22.2769	6			323.31	346520000	128	0.847897	0.508319	0.141939
86	F2HRJ5	30S ribosomal protein S16	rpsP BM28_A1817	20.3309	20.681	21.0427	21.6476	21.7469	20.675	6	NaN	NaN	NaN	NaN	NaN	NaN	0	+	+	124.07	50028000	16	10.8759	7.81068	1.33078e-11
87	F2HRJ8	Lytic murein transglycosylase	BM28_A1820	21.8467	21.3553	21.7492	21.4645	21.2318	21.422	6	NaN	21.2097	20.779	20.7332	NaN	NaN	3	+		56.048	125270000	55	1.56277	4.45291	0.0273672
88	F2HRJ9	Carbonic anhydrase (EC 4.2.1.1)	BM28_A1821	22.9806	22.5151	23.4973	22.8243	22.0873	21.3407	6	NaN	NaN	NaN	NaN	NaN	NaN	0	+	+	90.843	185310000	60	10.4522	9.33086	3.5302e-11
89	Q2YLJ3	PDZ/DHR/GLGF domain:Tail specific protease:Carboxyl-terminal protease (EC 3.4.21.-)	BAB1_1845	23.2062	22.1342	23.5628	22.6337	22.2197	21.8334	6	22.3424	22.52	22.0619	22.3526	22.219	22.7499	6			173.11	386890000	164	0.338842	0.224032	0.458308
90	Q2YLL8	50S ribosomal protein L27	rpmA BAB1_1857	NaN	NaN	NaN	16.9652	NaN	NaN	1	17.8504	17.6641	19.0417	20.2061	18.2354	17.8122	6	+	+	89.687	30055000	16	4.00792	-4.63244	9.81934e-05
91	Q2YLL7	50S ribosomal protein L21	rplU BAB1_1858	22.5299	23.5484	22.3049	23.5544	23.1022	22.6589	6	23.2279	23.3693	23.8469	23.4308	23.4169	22.8174	6			145.76	663870000	137	0.826889	-0.401777	0.148974
92	Q2YLP3	ErfK/YbiS/YcfS/YnhG	BAB1_1867	24.0342	24.2981	23.9179	23.8295	24.8306	NaN	5	24.4047	24.3576	24.7693	24.9271	24.9671	25.5209	6			5.7659	1357000000	21	0.678564	-2.47107	0.209622
93	F2HRN5	Chaperone protein ClpB	clpB BM28_A1857	24.2805	22.7431	24.0651	23.2028	22.4958	22.0163	6	23.1648	23.2424	22.9619	23.0184	23.0567	23.4143	6			323.31	604310000	213	0.00838626	-0.00912507	0.980875
94	F2HRN6	Uncharacterized protein	BM28_A1858	22.2413	23.5536	22.1697	22.7279	23.7651	23.6278	6	23.3917	23.7526	24.0121	23.7349	23.641	23.3067	6			279.12	783980000	311	1.12919	-0.625611	0.0742698
95	Q2YLN7	PEP-utilizing enzyme:Beta tubulin:GAF domain:Phosphoenolpyruvate-protein phosphotransferase (EC 2.7.3.9)	ptsP BAB1_1873	20.2138	19.2419	20.3017	19.2021	18.9428	18.9575	6	18.9421	18.9184	18.5077	18.8546	NaN	NaN	4			27.91	34717000	10	1.20665	2.53619	0.0621368
96	Q2YLN6	Aspartokinase (EC 2.7.2.4)	BAB1_1874	18.3673	NaN	18.1411	NaN	NaN	NaN	2	18.1149	17.8546	17.606	17.9102	17.6814	NaN	5			64.632	21704000	10	0.886563	-2.17144	0.129849
97	Q2YLN5	Ubiquinone biosynthesis O-methyltransferase (2-polyprenyl-6-hydroxyphenol methylase) (EC 2.1.1.222) (3-demethylubiquinone 3-O-methyltransferase) (EC 2.1.1.64)	ubiG BAB1_1875	16.172	NaN	17.8558	15.6276	NaN	NaN	3	24.6897	24.692	24.3916	24.5582	24.3742	25.1031	6	+	+	323.31	849090000	225	6.53563	-9.75391	2.9132e-07
98	Q2YM85	Cbb3-type cytochrome c oxidase subunit	BAB1_0389	NaN	NaN	18.9988	NaN	NaN	NaN	1	NaN	NaN	18.9067	NaN	19.1774	18.9434	3			14.622	25568000	14	0.586683	-1.9348	0.25901
99	Q2YM83	Cytochrome c heme-binding site:Cytochrome C oxidase, mono-heme subunit/FixO (EC 1.9.3.1)	ccoO BAB1_0391	NaN	NaN	NaN	NaN	NaN	NaN	0	18.9299	NaN	18.9983	18.895	18.9413	18.9283	5	+	+	17.749	14336000	6	3.26943	-4.7738	0.000537743
100	Q2YMA4	Uncharacterized protein	BAB1_0399	18.047	17.8062	18.7188	18.4226	NaN	NaN	4	NaN	NaN	NaN	NaN	NaN	NaN	0	+	+	3.6158	11902000	3	1.9782	3.35911	0.0105148
101	F2HRT3	Polyprenyl synthetase	BM28_A0424	19.4116	NaN	NaN	NaN	NaN	NaN	1	NaN	18.1956	NaN	18.1542	18.6104	18.5255	4			9.075	16395000	9	0.853264	-2.40735	0.140196
102	Q2YMA8	TPR repeat	BAB1_0430	18.9944	18.3182	19.0626	18.3002	18.0586	NaN	5	NaN	NaN	NaN	NaN	17.8316	17.79	2			15.499	17269000	9	1.27799	2.91375	0.0527245
103	Q2YME4	Glycine--tRNA ligase alpha subunit (EC 6.1.1.14) (Glycyl-tRNA synthetase alpha subunit) (GlyRS)	glyQ BAB1_0431	18.0575	17.7255	18.3848	NaN	17.4247	NaN	4	NaN	NaN	NaN	NaN	NaN	NaN	0	+	+	9.5597	11449000	5	1.97454	3.12542	0.0106037
104	Q2YMD5	Acyl-CoA dehydrogenase, C-terminal:Acyl-CoA dehydrogenase, central domain (EC 1.3.99.3)	BAB1_0440	22.4306	20.1671	22.2384	20.1965	20.1774	20.0554	6	19.4965	19.658	19.9271	19.6474	19.5129	20.2065	6	+		137.82	93778000	19	1.42101	1.13616	0.0379305
105	F2HRU8	Pyridoxine/pyridoxamine 5'-phosphate oxidase (EC 1.4.3.5) (PNP/PMP oxidase) (Pyridoxal 5'-phosphate synthase)	pdxH BM28_A0439	23.1329	24.0989	22.9761	22.8089	23.4348	22.6242	6	24.4098	25.0594	23.6111	24.1691	23.8544	23.9939	6	+	+	30.296	654690000	72	2.13396	-1.00365	0.00734575
106	F2HRV0	Chaperone protein DnaJ	BM28_A0441	21.3236	19.7268	21.0601	20.1323	19.7621	NaN	5	19.2562	18.9991	19.9462	18.9536	19.1423	18.9304	6			16.058	62782000	30	0.000589871	-0.00216087	0.998643
107	Q2YMC8	Enoyl-[acyl-carrier-protein] reductase [NADH] (EC 1.3.1.9)	fabI-1 BAB1_0447	22.5891	20.303	21.7813	21.6346	21.1984	20.9687	6	20.8817	20.6086	20.8614	21.0992	20.2908	21.2436	6			135.1	181840000	87	0.90135	0.581605	0.125502
108	Q2YMG3	ATP/GTP-binding site motif A (P-loop):Cold-shock DNA-binding domain	BAB1_0449	18.9992	20.588	19.4379	19.399	19.7824	19.9197	6	NaN	20.2568	19.536	19.7925	19.6884	NaN	4			15.709	94924000	20	0.760385	2.0721	0.173626
109	Q2YMF9	Uncharacterized protein	BAB1_0453	21.686	NaN	NaN	NaN	22.2553	22.2602	3	NaN	NaN	NaN	NaN	23.1025	23.3087	2			32.646	164700000	28	0.147174	1.09672	0.712568
110	Q2YMF7	3,4-Dihydroxy-2-butanone 4-phosphate synthase:GTP cyclohydrolase II (EC 3.5.4.25)	BAB1_0455	20.1657	19.5966	20.6805	19.6582	19.3493	NaN	5	NaN	18.6384	18.3	18.9644	18.9135	NaN	4			63.816	45746000	9	0.572812	1.904	0.267416
111	Q2YMF5	Exodeoxyribonuclease 7 small subunit (EC 3.1.11.6) (Exodeoxyribonuclease VII small subunit)	xseB BAB1_0457	21.0443	23.0314	21.0684	21.8039	22.577	22.6917	6	23.2724	22.8303	23.7063	22.9369	23.2683	22.8869	6	+	+	120.82	320200000	115	1.84695	-1.11406	0.0142248
112	F2HRX0	Uncharacterized protein	BM28_A0461	23.2195	24.212	23.3738	23.8234	24.3051	24.0454	6	22.5099	21.9337	21.8542	21.8425	21.8047	21.7216	6	+	+	97.053	562050000	101	5.25482	1.88544	5.56138e-06
113	Q2YME5	Peptidoglycan-binding LysM	BAB1_0467	19.4811	19.5822	19.144	19.4704	19.2524	19.5749	6	19.6023	NaN	19.8494	NaN	19.9431	19.9107	4			8.7521	38588000	20	0.642823	1.79658	0.227602
114	Q2YPZ4	Acyl-CoA dehydrogenase:Acyl-CoA dehydrogenase, C-terminal:Acyl-CoA dehydrogenase, central domain:Acyl-CoA dehydrogenase, N-te (EC 1.3.99.7)	BAB1_1109	21.6096	19.9269	21.7116	20.8107	19.9936	19.6947	6	23.5653	23.4429	23.251	23.9586	23.6697	23.9986	6	+	+	323.31	938810000	209	4.89462	-3.02319	1.27462e-05
115	Q2YPY6	Peptidyl-prolyl cis-trans isomerase (EC 5.2.1.8)	BAB1_1117	24.386	25.5261	24.6924	24.7153	25.2237	25.0413	6	25.9306	25.6022	25.8073	25.7354	25.6743	25.7233	6	+	+	323.31	2161400000	357	3.04888	-0.814704	0.00089355
116	F2HRZ0	Peptidyl-prolyl cis-trans isomerase (EC 5.2.1.8)	BM28_A1106	26.0505	27.3756	25.4276	26.6583	27.3214	27.3992	6	26.9004	26.8102	27.0741	27.0055	26.9409	26.8934	6			323.31	6055600000	556	0.294604	-0.23198	0.507453
117	Q2YPY2	DNA gyrase subunit A (EC 5.99.1.3)	gyrA BAB1_1121	22.7747	22.6208	22.6943	22.5659	22.2407	21.9377	6	22.0144	22.4418	22.1435	22.2321	21.8978	22.1767	6			159.27	296460000	95	1.2256	0.321291	0.059484
118	F2HRZ7	Single-stranded DNA-binding protein (SSB)	BM28_A1113	24.3499	25.2572	24.0344	24.5793	24.8852	25.0369	6	24.2921	24.27	24.1127	24.3834	24.1713	24.1628	6	+		323.31	1145100000	282	1.43304	0.458422	0.0368947
119	Q2YPX4	Histone-like bacterial DNA-binding protein	BAB1_1129	28.2243	29.2281	28.1009	28.789	28.9496	29.0016	6	28.6502	28.6335	28.8375	28.5204	28.4356	28.3374	6			323.31	19392000000	704	0.321184	0.146448	0.477327
120	Q2YPX2	ATP-dependent Clp protease ATP-binding subunit ClpX	clpX BAB1_1131	22.6699	19.9315	23.0701	20.9029	20.0767	19.4199	6	19.075	19.2064	19.2025	NaN	19.4375	19.5358	5	+		119.41	135420000	49	1.3511	2.73398	0.0445549
121	F2HS02	ATP-dependent Clp protease proteolytic subunit (EC 3.4.21.92) (Endopeptidase Clp)	clpP BM28_A1118	25.322	25.5276	24.8019	25.6208	26.1207	25.1866	6	25.1531	24.8804	25.137	24.8997	25.1219	24.5921	6	+		284.37	1731200000	246	1.35585	0.465924	0.0440707
122	Q2YPW6	CbxX/CfqX superfamily:Chaperonin clpA/B:Response regulator receiver:Sigma-54 factor interaction domain:Helix-turn-helix, Fis	BAB1_1138	21.9408	18.7762	21.282	18.9346	18.8085	NaN	5	18.6129	18.629	18.2544	18.7326	18.5804	20.2334	6			20.502	59147000	18	0.00398265	-0.0151054	0.990872
123	Q2YPW3	Histidine kinase (EC 2.7.13.3)	BAB1_1141	20.2452	18.9982	19.9854	19.1404	18.8319	NaN	5	NaN	NaN	NaN	NaN	NaN	NaN	0	+	+	14.452	21002000	7	3.19295	5.19183	0.000641284
124	Q2YPW0	CinA, C-terminal	BAB1_1144	20.5174	22.4287	21.0552	21.0591	22.3185	20.6996	6	22.6593	22.0094	21.8579	22.2107	22.3159	21.7965	6			28.153	184280000	43	1.28237	-0.795211	0.0521956
125	F2HS18	Dihydrolipoyl dehydrogenase (EC 1.8.1.4)	lpdA BM28_A1134	23.2914	21.5002	23.0276	22.4373	21.2715	20.7454	6	20.1371	20.8178	20.4794	20.8164	20.2492	21.6807	6	+	+	176.98	210600000	60	1.74835	1.34883	0.0178504
126	F2HS19	Acetyltransferase component of pyruvate dehydrogenase complex (EC 2.3.1.12)	BM28_A1135	20.4624	20.1987	20.2576	20.4243	20.1446	19.9989	6	NaN	NaN	NaN	NaN	NaN	NaN	0	+	+	19.295	34917000	26	15.6536	7.03776	2.22045e-16
127	Q2YPV4	Biotin/lipoyl attachment:2-oxo acid dehydrogenase, acyltransferase component, lipoyl-binding:Transketolase, central region:Tr (EC 1.2.4.1)	BAB1_1151	23.888	23.224	24.0704	23.428	22.8828	22.3827	6	22.21	22.2548	21.9929	22.1001	22.0895	22.3951	6	+	+	289.36	559570000	131	2.8251	1.13891	0.00149588
128	Q2YPV3	Pyruvate dehydrogenase E1 component subunit alpha (EC 1.2.4.1)	pdhA BAB1_1152	23.4077	20.4237	23.1935	22.6866	20.8428	20.672	6	20.789	20.9215	20.5222	19.9707	20.3129	21.2326	6			220.43	222980000	99	1.22034	1.24625	0.0602084
129	F2HS24	Enolase (EC 4.2.1.11) (2-phospho-D-glycerate hydro-lyase) (2-phosphoglycerate dehydratase)	eno BM28_A1140	23.6655	23.4545	23.3632	23.6885	24.502	24.4919	6	NaN	NaN	NaN	NaN	NaN	NaN	0	+	+	141.98	425020000	44	12.7231	10.6509	1.89182e-13
130	Q2YPU9	2-dehydro-3-deoxyphosphooctonate aldolase (EC 2.5.1.55) (3-deoxy-D-manno-octulosonic acid 8-phosphate synthase) (KDO-8-phosphate synthase) (KDO 8-P synthase) (KDOPS) (Phospho-2-dehydro-3-deoxyoctonate aldolase)	kdsA BAB1_1156	22.9229	22.9974	23.2061	22.6383	22.4535	22.2077	6	22.5976	22.1715	21.9191	22.164	21.8417	22.3885	6	+	+	323.31	327740000	107	1.81462	0.557273	0.0153244
131	Q2YPU8	CTP synthase (EC 6.3.4.2) (CTP synthetase) (UTP--ammonia ligase)	pyrG BAB1_1157	21.068	22.308	22.3907	22.0047	21.5264	21.2809	6	20.6213	21.1722	20.8778	20.5442	20.65	20.3373	6	+	+	42.091	170610000	56	2.72322	1.06262	0.00189138
132	Q2YRR7	Triosephosphate isomerase (TIM) (EC 5.3.1.1) (Triose-phosphate isomerase)	tpiA-1 tpiA BAB1_1161	22.0243	22.1852	22.8324	22.3976	21.9588	21.3922	6	22.085	21.877	21.394	21.5809	21.4497	21.9275	6			291.91	230590000	94	1.00139	0.412744	0.0996793
133	Q2YRR1	LexA repressor (EC 3.4.21.88)	lexA BAB1_1167	19.3003	19.0547	20.2369	NaN	NaN	NaN	3	18.5813	18.6088	NaN	NaN	NaN	NaN	2			50.957	32152000	9	0.32751	1.36532	0.470424
134	Q2YRQ9	Glutamate--tRNA ligase 2 (EC 6.1.1.17) (Glutamyl-tRNA synthetase 2) (GluRS 2)	gltX2 BAB1_1169	21.3663	20.3081	21.7224	20.9226	19.8647	NaN	5	NaN	19.5996	19.5698	20.2442	19.7793	19.9608	5			88.078	104810000	42	0.197714	0.838411	0.634288
135	Q2YRQ8	Citrate synthase (EC 2.3.3.16)	gltA BAB1_1170	22.9003	22.176	22.6867	22.5651	22.1486	21.7008	6	21.5955	21.6639	21.2925	21.2648	21.5494	21.7651	6	+	+	277.83	323360000	129	2.79336	0.841035	0.00160931
136	Q2YRQ3	UDP-3-O-acylglucosamine N-acyltransferase (EC 2.3.1.-)	lpxD BAB1_1175	19.6203	NaN	20.0054	18.7359	NaN	NaN	3	18.2263	18.455	NaN	NaN	18.5261	NaN	3			17.023	22342000	10	0.108417	0.525691	0.779081
137	F2HS46	Outer membrane protein assembly factor BamA	yaeT bamA BM28_A1162	23.9258	24.8821	23.807	24.578	24.8162	25.0135	6	25.7463	25.0678	25.2021	25.0433	25.272	25.3228	6	+	+	323.31	1811100000	467	2.08851	-0.771969	0.00815619
138	F2HS50	Ribosome-recycling factor (RRF) (Ribosome-releasing factor)	frr BM28_A1166	22.7944	23.0639	22.8322	23.1748	22.526	21.9105	6	NaN	NaN	NaN	NaN	NaN	NaN	0	+	+	8.1814	251690000	29	12.7056	9.50698	1.96954e-13
139	Q2YRP5	Elongation factor Ts (EF-Ts)	tsf BAB1_1183	23.2277	22.2532	23.3254	22.869	22.3445	21.5643	6	22.4595	22.4209	22.4683	22.3774	22.2503	22.6318	6			194.83	492330000	162	0.242349	0.162637	0.572335
140	Q2YRJ1	30S ribosomal protein S2	rpsB BAB1_1184	19.312	NaN	19.7592	20.0184	20.0389	NaN	4	NaN	20.4026	19.454	NaN	19.9119	NaN	3			42.337	58321000	26	0.202202	1.02498	0.627766
141	Q2YRJ0	ATP/GTP-binding site motif A (P-loop)	BAB1_1186	23.474	24.3791	23.3691	23.7157	24.1899	23.86	6	22.8238	22.9028	22.8997	22.8981	22.6537	22.7906	6	+	+	153.56	529360000	166	3.89341	1.00314	0.000127817
142	F2HS56	Endoribonuclease L-PSP	BM28_A1172	22.8345	22.0419	22.5126	22.4024	21.8348	22.0199	6	21.9357	21.8886	21.5491	21.7742	22.063	22.3997	6			243.93	249920000	72	0.966764	0.339301	0.107953
143	Q2YRJ7	Glycerophosphoryl diester phosphodiesterase	BAB1_1188	19.9254	20.4958	20.1735	19.4482	19.466	20.1343	6	NaN	20.2014	19.9015	19.6751	NaN	NaN	3	+		21.212	53687000	24	1.30182	3.37254	0.0499091
144	F2HS59	Histidine triad protein	BM28_A1175	22.0837	21.8654	22.1202	21.7962	21.4776	21.3152	6	21.0834	21.2829	20.9479	20.9512	21.0521	20.9967	6	+	+	42.165	177870000	96	3.34234	0.724017	0.000454629
145	Q2YLM8	Brucella melitensis biovar Abortus 2308 chromosome I, complete sequence, strain 2308	BAB1_1884	21.3495	20.0841	22.8559	21.0874	19.9797	18.9582	6	NaN	19.5533	19.1897	18.7633	18.8271	19.2314	5	+		91.069	99300000	20	1.34162	2.59	0.0455388
146	Q2YLM7	Brucella melitensis biovar Abortus 2308 chromosome I, complete sequence, strain 2308	BAB1_1885	24.0299	24.9221	24.1905	24.2176	24.6662	24.3356	6	24.6554	24.6832	24.4399	24.4931	24.4032	24.2857	6			323.31	1121900000	377	0.282524	-0.0997966	0.521767
147	Q2YLR2	YCII-related domain	BAB1_1890	23.3088	24.1734	23.1096	23.5187	23.6465	23.9083	6	24.0527	23.1219	24.2182	24.0677	23.9142	23.8017	6			141.09	726880000	113	0.539318	-0.251865	0.288857
148	F2HS75	Acyl-CoA thioesterase II	tesB BM28_A1887	20.703	22.7403	21.1816	21.8108	21.85	21.445	6	22.6682	22.5358	22.6308	22.3253	22.4886	22.268	6	+	+	209.5	273940000	136	1.85364	-0.864321	0.0140075
149	F2HS78	Glyoxalase/bleomycin resistance protein/dioxygenase	BM28_A1890	23.3914	25.4149	23.7426	24.9675	24.6741	25.4431	6	21.433	21.8677	21.6829	21.7212	21.5495	21.1326	6	+	+	127.86	988810000	166	5.06112	3.04113	8.68721e-06
150	Q2YLQ2	Succinate dehydrogenase iron-sulfur subunit (EC 1.3.5.1)	BAB1_1900	21.7616	21.2799	22.0567	21.6008	20.8906	20.0299	6	19.77	20.4147	19.7875	19.6963	19.862	20.2145	6	+	+	84.594	126550000	49	2.67113	1.31239	0.0021324
151	F2HS80	Succinate dehydrogenase flavoprotein subunit (EC 1.3.5.1)	sdhA BM28_A1892	23.5047	22.9305	23.6205	23.0455	22.8923	22.4976	6	22.7697	22.6753	22.3308	22.6819	22.4979	23.0331	6			323.31	443940000	158	1.22446	0.417065	0.0596405
152	Q2YLP8	GCN5-related N-acetyltransferase (EC 2.3.1.-)	BAB1_1904	22.2465	21.3562	22.217	21.8723	21.7442	21.3589	6	23.5277	23.6834	23.5581	23.3766	23.7689	24.101	6	+	+	132.14	496350000	153	5.72699	-1.87009	1.87502e-06
153	Q2YLP6	50S ribosomal protein L19	rplS BAB1_1906	23.4201	24.3254	23.3052	24.1987	23.84	23.6206	6	23.9739	23.9785	24.3594	24.1134	23.978	23.4373	6			323.31	1183100000	302	0.410113	-0.188393	0.388944
154	Q2YLS3	Dihydrolipoyllysine-residue succinyltransferase component of 2-oxoglutarate dehydrogenase complex (EC 2.3.1.61) (2-oxoglutarate dehydrogenase complex component E2)	sucB BAB1_1922	24.8832	23.7281	24.7459	23.8975	23.321	22.5471	6	24.2209	23.9692	23.8538	23.5998	23.782	24.477	6			323.31	1022000000	260	0.13049	-0.12997	0.740475
155	F2HSA2	2-oxoglutarate dehydrogenase E1 component (EC 1.2.4.2) (Alpha-ketoglutarate dehydrogenase)	sucA odhA BM28_A1914	23.708	22.322	23.7188	22.7312	22.3185	21.8949	6	22.7655	23.0896	22.7389	23.0225	22.8021	23.0643	6			323.31	478840000	245	0.161162	-0.131615	0.689983
156	Q2YLS1	Succinyl-CoA ligase [ADP-forming] subunit alpha (EC 6.2.1.5)	BAB1_1925	24.2422	23.4987	24.1579	23.8081	23.3752	22.8458	6	25.3247	25.2631	25.3413	25.0688	25.4549	25.4569	6	+	+	205.6	1528100000	240	4.67742	-1.66362	2.10176e-05
157	F2HSA5	Succinyl-CoA ligase [ADP-forming] subunit beta (EC 6.2.1.5) (Succinyl-CoA synthetase subunit beta)	sucC BM28_A1917	25.1635	24.6266	25.1956	24.9852	24.5703	23.7943	6	26.462	26.5175	26.4148	26.1698	26.4097	26.6126	6	+	+	323.31	3345100000	477	4.76586	-1.70849	1.71451e-05
158	F2HSA6	Malate dehydrogenase (EC 1.1.1.37)	mdh BM28_A1918	25.415	23.4164	24.6726	23.6396	23.4095	23.2366	6	25.2109	25.1416	25.0172	25.4269	25.0588	26.0802	6	+	+	323.31	2015000000	403	2.20676	-1.35765	0.00621215
159	Q2YLR6	Outer membrane lipoprotein omp19 (18 kDa immunoreactive antigen) (19 kDa OMP) (Minor outer membrane protein omp19)	omp19 BAB1_1930	19.5967	20.7013	20.7397	19.3497	19.6832	20.7388	6	19.2261	NaN	19.3335	19.3982	19.1811	19.7824	5			55.779	55079000	34	0.898579	1.77967	0.126305
160	Q2YLU8	Hydroxyacylglutathione hydrolase (EC 3.1.2.6) (Glyoxalase II) (Glx II)	gloB BAB1_1936	21.3787	20.7191	21.7569	20.5442	20.0837	19.7562	6	19.9511	18.9929	19.247	19.895	19.6254	19.5627	6	+	+	96.086	97235000	59	2.14704	1.16079	0.0071279
161	F2HSB5	Uncharacterized protein	BM28_A1927	21.6055	22.806	21.6433	22.1278	22.5525	22.43	6	NaN	NaN	NaN	NaN	NaN	NaN	0	+	+	36.937	127590000	29	12.1204	8.98419	7.57838e-13
162	Q2YLU2	Peptidylprolyl isomerase (EC 5.2.1.8)	BAB1_1944	21.2182	22.2038	21.5916	21.1936	22.6395	22.4114	6	23.3597	23.6018	23.3222	23.4238	22.9835	23.4029	6	+	+	186.78	471010000	180	3.57239	-1.47265	0.000267679
163	Q2YMH2	50S ribosomal protein L9	rplI BAB1_0477	23.9745	24.6909	23.96	24.46	24.5659	24.3259	6	25.2315	25.4881	25.5381	25.4622	25.256	24.9151	6	+	+	323.31	1831500000	382	4.0415	-0.985639	9.08869e-05
164	Q2YMH0	30S ribosomal protein S18	rpsR BAB1_0479	21.4307	21.516	21.3968	22.1356	21.1302	21.3926	6	21.416	22.2274	22.5558	21.6136	21.7478	21.7258	6			7.7415	174350000	47	0.933775	-0.38075	0.116473
165	Q2YMG9	30S ribosomal protein S6	rpsF BAB1_0480	23.7399	24.783	24.2905	24.1688	24.1694	23.9442	6	24.3735	24.5718	24.8166	24.4966	24.5264	24.0681	6			232.44	1115500000	263	0.895177	-0.292852	0.127299
166	F2HSE5	Malonyl CoA-acyl carrier protein transacylase (EC 2.3.1.39)	fabD BM28_A0477	22.0697	20.9229	22.3161	21.5762	21.0408	20.6667	6	20.4789	20.3161	20.3773	20.708	20.3241	20.9895	6	+	+	200.25	155200000	66	1.93241	0.89977	0.0116838
167	Q2YMG6	Short-chain dehydrogenase/reductase SDR:Glucose/ribitol dehydrogenase (EC 1.1.1.100)	fabG BAB1_0483	25.5815	26.5175	25.8542	25.9334	25.7936	26.0394	6	25.8601	25.5986	25.6662	25.8682	25.5512	26.0214	6			323.31	3181000000	523	0.644883	0.192319	0.226526
168	Q2YMG5	Acyl carrier protein (ACP)	acpP BAB1_0484	NaN	20.8483	21.0598	20.448	21.1052	20.6439	5	21.4627	21.2259	21.5763	21.0572	21.518	NaN	5			28.634	94911000	31	0.0905751	-0.455828	0.811755
169	Q2YMJ5	3-oxoacyl-[acyl-carrier-protein] synthase 2 (EC 2.3.1.179)	BAB1_0486	22.4114	21.3135	23.3588	21.8194	21.0816	20.994	6	21.6407	21.2246	21.4415	21.6354	21.3639	21.507	6			236.29	323750000	90	0.438252	0.360935	0.364542
170	Q2YMJ4	Uncharacterized protein	BAB1_0487	17.8102	18.8707	17.5085	NaN	18.0068	18.5318	5	18.2231	NaN	18.2865	NaN	17.7996	17.8022	4			7.5726	20919000	13	0.290814	0.901091	0.511901
171	F2HSF2	Peptidase U62	BM28_A0484	20.9225	21.4106	21.0181	21.154	20.8689	20.7731	6	NaN	NaN	NaN	NaN	NaN	NaN	0	+	+	181.81	72669000	52	14.8085	7.81456	1.55431e-15
172	Q2YMJ0	Uncharacterized protein	BAB1_0491	21.3753	21.9548	20.6303	21.529	21.6544	21.9995	6	22.8173	21.7404	22.6764	22.3712	22.3804	22.6643	6	+	+	52.849	180440000	75	2.2844	-0.917785	0.00519514
173	Q2YMI9	Cytochrome c oxidase subunit 2 (EC 1.9.3.1)	BAB1_0492	21.4334	20.944	22.1495	21.246	20.8171	20.6871	6	NaN	NaN	NaN	NaN	NaN	NaN	0	+	+	138.59	100640000	19	11.2616	8.00284	5.47518e-12
174	Q2YMI2	Alkyl hydroperoxide reductase/ Thiol specific antioxidant/ Mal allergen	BAB1_0504	24.5305	24.2605	24.699	24.2353	24.0726	23.5554	6	24.4176	24.4978	24.2068	24.1975	24.2958	24.2101	6			323.31	1310900000	274	0.184468	-0.0787309	0.653932
175	Q2YMK8	Serine/threonine dehydratase, pyridoxal-phosphate attachment site:Pyridoxal-5'-phosphate-dependent enzyme, beta family:Threon (EC 4.2.3.1)	BAB1_0510	20.9917	19.4655	20.3948	19.418	19.3113	NaN	5	19.0288	19.0985	19.5102	19.0219	NaN	NaN	4			100.44	45335000	16	0.438188	1.61863	0.364596
176	Q2YMK7	Lipoprotein, putative	BAB1_0511	21.123	22.0004	21.2485	21.5983	21.8001	21.9617	6	21.6384	21.5764	21.6243	21.3616	21.3072	21.8173	6			99.619	162150000	102	0.15666	0.0677849	0.697173
177	Q2YMJ7	DSBA oxidoreductase:Twin-arginine translocation pathway signal	BAB1_0521	23.8604	23.3687	23.9757	23.545	23.1165	22.8191	6	23.6015	23.3217	23.7534	23.3019	23.5359	23.886	6			187.84	703630000	182	0.243628	-0.119142	0.570653
178	F2HSI7	Pyruvate phosphate dikinase	ppdK BM28_A0519	22.132	21.3315	22.9063	20.5222	20.3292	20.0944	6	NaN	19.9112	NaN	20.5545	20.2875	21.2503	4			116.9	171520000	46	1.09963	3.1487	0.0794998
179	F2HSI8	Polysaccharide deacetylase	BM28_A0520	23.1919	24.2487	23.2816	23.7186	24.4725	23.7998	6	21.6974	21.1915	20.3363	20.7934	20.6554	20.3845	6	+	+	180.65	336140000	75	5.75618	2.94243	1.75316e-06
180	Q2YMM2	5-hydroxyisourate hydrolase (HIU hydrolase) (HIUHase) (EC 3.5.2.17)	BAB1_0532	20.1951	20.4292	20.6655	19.6647	19.8495	19.5296	6	19.4196	NaN	NaN	NaN	NaN	NaN	1	+	+	47.421	56991000	30	3.5996	5.81065	0.000251418
181	Q2YMP4	DegT/DnrJ/EryC1/StrS aminotransferase	BAB1_0544	21.9511	20.3755	21.8372	21.4008	20.8484	19.9372	6	20.3803	19.6271	20.2488	20.3131	19.7751	20.7587	6	+		54.945	118750000	97	1.39096	0.874536	0.0406485
182	Q2YMP3	GDP-mannose 4,6-dehydratase (EC 4.2.1.47) (GDP-D-mannose dehydratase)	gmd BAB1_0545	24.5022	24.3291	24.711	24.0322	23.635	23.5388	6	22.649	22.7079	22.4172	22.9031	22.4307	22.7232	6	+	+	246.02	743200000	192	4.51121	1.48621	3.08171e-05
183	F2HSN2	Uncharacterized protein	BM28_A1190	25.9611	23.9161	25.3062	24.7813	24.5793	24.6271	6	24.322	25.0328	24.5636	25.2528	24.7216	25.5283	6			273.44	1714100000	253	0.0434791	-0.041674	0.904734
184	Q2YRW5	NADPH-dependent 7-cyano-7-deazaguanine reductase (EC 1.7.1.13) (7-cyano-7-carbaguanine reductase) (NADPH-dependent nitrile oxidoreductase) (PreQ(0) reductase)	queF BAB1_1206	21.2578	20.7341	21.5233	21.0029	20.6031	19.9468	6	NaN	NaN	NaN	NaN	NaN	17.7363	1	+	+	68.481	75266000	42	5.26752	6.88027	5.40102e-06
185	F2HSP0	Uncharacterized protein	BM28_A1198	NaN	21.1487	NaN	20.0563	20.5323	20.5497	4	20.5702	20.1672	20.7578	21.1423	21.0577	20.9781	6			128.84	83880000	22	0.92075	-2.66104	0.120019
186	Q2YRV5	Tetracycline resistance protein TetB	BAB1_1216	27.8895	29.6254	27.5408	28.3633	28.8404	29.2918	6	27.777	27.5887	27.8647	27.3598	27.4118	26.4512	6	+	+	323.31	20184000000	990	1.89897	1.18304	0.0126191
187	Q2YRV4	Glutamate racemase (EC 5.1.1.3)	murI BAB1_1217	18.1831	17.7858	19.4213	17.7638	17.7445	NaN	5	17.3045	NaN	NaN	17.049	NaN	NaN	2	+		3.882	9314800	4	1.38147	2.81916	0.0415463
188	Q2YRV0	Isocitrate dehydrogenase [NADP] (EC 1.1.1.42)	BAB1_1221	21.7784	21.4937	21.9735	21.5733	20.7468	21.8823	6	20.2516	21.0249	20.2199	19.4187	19.5872	20.2868	6	+	+	154.78	208510000	76	3.18506	1.44314	0.000653036
189	Q2YRU8	Alanine--tRNA ligase (EC 6.1.1.7) (Alanyl-tRNA synthetase) (AlaRS)	alaS BAB1_1223	20.9813	19.8908	21.1635	20.4201	19.9634	19.3398	6	19.7832	19.407	19.4772	19.6348	19.7208	19.7598	6	+		232.98	72666000	33	1.33465	0.662694	0.0462751
190	F2HSQ5	OmpA/MotB domain-containing protein	BM28_A1213	21.1046	21.1166	20.7415	21.0427	21.0479	20.6624	6	NaN	NaN	NaN	NaN	NaN	NaN	0	+	+	204.98	55059000	25	15.3525	7.74261	4.44089e-16
191	F2HSQ8	Protease Do	BM28_A1216	19.9493	19.9783	19.606	NaN	19.6398	19.5732	5	19.3252	NaN	19.1753	19.4259	19.2081	NaN	4			27.098	36933000	10	0.371705	1.40036	0.424908
192	Q2YRU1	50S ribosomal protein L17	rplQ BAB1_1230	21.3508	21.1491	20.0296	21.1174	22.0454	21.7073	6	22.0614	22.2597	22.8292	23.1811	22.1259	22.2105	6	+	+	104.31	328120000	94	2.31504	-1.21136	0.00484131
193	Q2YRU0	DNA-directed RNA polymerase subunit alpha (RNAP subunit alpha) (EC 2.7.7.6) (RNA polymerase subunit alpha) (Transcriptase subunit alpha)	rpoA BAB1_1231	24.3629	23.1141	23.9406	23.9421	23.1547	22.3723	6	21.9831	22.1543	22.3262	22.0254	22.3642	22.1386	6	+	+	83.823	585300000	149	2.81599	1.31581	0.0015276
194	Q2YRT9	30S ribosomal protein S11	rpsK BAB1_1232	19.866	19.5822	19.2369	19.9217	19.655	19.6565	6	20.0836	19.2541	19.7984	19.5729	19.887	NaN	5			23.435	52020000	13	0.42671	1.0187	0.37436
195	Q2YRT8	30S ribosomal protein S13	rpsM BAB1_1233	22.6105	23.1431	22.3832	23.3911	23.366	23.6161	6	23.8351	24.0445	24.1735	23.8168	23.6439	23.5525	6	+	+	270.69	695260000	151	2.20848	-0.759392	0.00618759
196	Q2YRT7	Adenylate kinase (AK) (EC 2.7.4.3) (ATP-AMP transphosphorylase) (ATP:AMP phosphotransferase) (Adenylate monophosphate kinase)	adk BAB1_1234	21.013	20.6216	21.6136	21.2792	20.0076	19.3107	6	NaN	20.055	19.9887	19.8672	20.0179	20.2731	5			52.545	103730000	26	0.756213	1.73896	0.175302
197	Q2YRT5	50S ribosomal protein L15	rplO BAB1_1236	23.1745	23.1102	23.0315	23.2565	22.6414	22.7331	6	24.2741	24.3376	24.4183	24.2476	23.9989	24.2096	6	+	+	270.31	1092700000	229	6.08734	-1.25647	8.17819e-07
198	Q2YRT4	50S ribosomal protein L30	rpmD BAB1_1237	24.1411	24.7801	23.4004	24.6645	24.7244	23.9926	6	24.7206	24.3611	23.8843	24.4939	24.521	24.0979	6			323.31	1481700000	196	0.0912832	-0.0626125	0.810432
199	Q2YRT3	30S ribosomal protein S5	rpsE BAB1_1238	23.5024	23.4805	23.6698	23.9333	24.0966	23.6257	6	23.7262	24.1845	24.1384	24.2124	24.1707	23.7986	6	+		323.31	1036100000	310	1.42347	-0.320419	0.0377166
200	Q2YRT2	50S ribosomal protein L18	rplR BAB1_1239	23.1349	23.784	22.833	23.9439	23.8033	23.6765	6	24.1578	24.8045	24.9282	25.1068	24.5834	23.9855	6	+	+	265.11	1333000000	233	2.71982	-1.06511	0.00190625
201	F2HSS1	50S ribosomal protein L6	rplF BM28_A1229	23.2659	23.8402	22.7996	23.7437	23.8038	23.7335	6	22.8315	21.6533	22.7135	21.6818	22.1811	21.3937	6	+	+	165.53	632420000	129	3.20367	1.45528	0.00062565
202	Q2YRA8	30S ribosomal protein S14	rpsN BAB1_1242	22.2945	23.219	22.7862	23.3229	22.8295	22.8157	6	22.0873	22.5183	22.9181	22.5918	22.2547	22.0333	6	+		181.64	499310000	116	1.38838	0.47742	0.0408903
203	Q2YRA7	50S ribosomal protein L5	rplE BAB1_1243	22.7479	22.963	22.0456	22.9322	23.4851	23.2989	6	22.9769	23.7968	23.7014	23.7222	23.0804	23.0922	6			92.495	716320000	162	1.04552	-0.482868	0.0900493
204	Q2YRA6	50S ribosomal protein L24	rplX BAB1_1244	22.7234	22.9005	22.8869	23.0036	23.1255	23.4468	6	23.8143	24.0378	24.5173	23.9875	23.9033	23.4406	6	+	+	46.189	948900000	110	3.47813	-0.935709	0.00033256
205	Q2YRA5	50S ribosomal protein L14	rplN BAB1_1245	20.9969	20.8426	20.4206	19.968	20.6489	20.5991	6	20.5537	20.2291	21.4313	20.8749	20.8672	21.3839	6			142.26	185780000	92	0.646802	-0.310665	0.225527
206	Q2YRA4	30S ribosomal protein S17	rpsQ BAB1_1246	23.5274	24.4294	23.0943	24.4244	24.2039	24.2661	6	24.373	24.2521	24.8778	24.4192	24.3691	24.2518	6			193.39	1154300000	267	0.971292	-0.4329	0.106834
207	Q2YRA3	50S ribosomal protein L29	rpmC BAB1_1247	22.9906	24.3731	NaN	24.106	23.8845	23.2785	5	24.2684	25.0008	24.9262	24.7376	23.8286	23.6427	6			131.13	1085200000	81	0.692741	-2.42694	0.202889
208	P0C0Z4	50S ribosomal protein L16	rplP BAB1_1248	21.5219	21.3696	22.0517	21.4737	20.8591	20.4214	6	21.6787	22.5339	22.4089	22.3823	21.45	21.5315	6	+		119.64	272490000	88	1.37163	-0.714657	0.0424979
209	Q2YRA1	30S ribosomal protein S3	rpsC BAB1_1249	21.3092	20.7702	21.8204	21.4601	20.3297	19.8971	6	20.3182	21.1827	21.2714	21.3203	20.3413	21.327	6			42.046	144660000	73	0.0281561	-0.0290302	0.937225
210	Q2YRA0	50S ribosomal protein L22	rplV BAB1_1250	21.5201	21.9555	21.5087	21.973	21.7263	21.5364	6	22.8355	23.1736	23.4527	23.3195	22.603	22.5716	6	+	+	134.63	474220000	161	4.57408	-1.2893	2.66637e-05
211	Q2YM06	50S ribosomal protein L2	rplB BAB1_1252	24.0829	24.1171	23.9903	24.9202	24.477	24.0889	6	24.1607	25.23	25.1032	24.9186	24.8829	24.4723	6	+		323.31	1917100000	370	1.38721	-0.515175	0.041001
212	F2HST4	50S ribosomal protein L23	rplW BM28_A1242	19.4394	19.4951	18.6249	19.8671	19.9339	NaN	5	NaN	NaN	NaN	NaN	NaN	NaN	0	+	+	74.042	48305000	27	3.21753	5.2184	0.000605998
213	Q2YM04	50S ribosomal protein L4	rplD BAB1_1254	24.2962	24.314	24.3994	24.4653	24.2345	24.2337	6	25.0344	25.2333	25.3047	25.2201	25.2092	24.6228	6	+	+	323.31	1930100000	412	4.49024	-0.780227	3.23418e-05
214	Q2YM03	50S ribosomal protein L3	rplC BAB1_1255	23.4377	24.2654	23.7091	24.5895	24.2678	23.8756	6	24.5136	25.103	24.97	24.7851	24.6822	24.2613	6	+	+	323.31	1672700000	366	2.06084	-0.694995	0.00869274
215	Q2YM02	30S ribosomal protein S10	rpsJ BAB1_1256	22.6124	23.0166	22.4617	23.5195	23.1271	23.1345	6	23.3403	23.7018	23.64	23.6083	23.4241	22.915	6	+		74.588	613990000	168	1.37825	-0.459577	0.041855
216	Q2YM08	Elongation factor Tu (EF-Tu)	tuf1 BAB1_1257; tuf2 BAB1_1271	27.4847	26.6521	27.516	27.2979	26.8072	26.3957	6	26.6075	26.465	26.3683	26.4304	26.5417	26.7304	6	+		323.31	9203400000	1063	1.51208	0.501703	0.0307554
217	F2HST9	Elongation factor G (EF-G)	fusA BM28_A1247	22.8727	21.9002	23.1926	22.3395	21.6306	21.2255	6	NaN	NaN	NaN	NaN	NaN	NaN	0	+	+	29.817	153100000	22	10.3003	8.98351	5.00797e-11
218	Q2YLZ9	30S ribosomal protein S7	rpsG BAB1_1259	24.1974	25.3894	24.7723	25.139	25.2244	25.2512	6	25.7128	26.0207	25.7334	25.6409	25.5632	25.1983	6	+	+	323.31	2200100000	372	1.92801	-0.649247	0.0118029
219	F2HSU5	DNA-directed RNA polymerase subunit beta' (RNAP subunit beta') (EC 2.7.7.6) (RNA polymerase subunit beta') (Transcriptase subunit beta')	rpoC BM28_A1253	24.2974	22.777	24.4606	23.6903	22.68	22.1924	6	21.2869	21.2959	20.9393	21.0503	21.372	21.8211	6	+	+	323.31	580860000	251	3.3466	2.05538	0.00045019
220	Q2YM15	DNA-directed RNA polymerase subunit beta (RNAP subunit beta) (EC 2.7.7.6) (RNA polymerase subunit beta) (Transcriptase subunit beta)	rpoB BAB1_1264	24.7482	23.8505	24.9501	24.4968	23.4944	23.0031	6	22.8069	22.5937	22.4029	21.8636	22.8396	22.5038	6	+	+	323.31	881550000	315	3.01476	1.58876	0.000966575
221	Q2YM14	50S ribosomal protein L7/L12	rplL BAB1_1265	26.6549	27.2804	26.1673	27.2283	27.3917	27.2781	6	27.5795	26.6554	27.8588	27.2401	27.578	27.1778	6			323.31	9864700000	417	0.670257	-0.348164	0.21367
222	Q2YLV3	Universal stress protein	BAB1_1967	20.2693	19.8896	20.6125	18.904	20.1862	19.6012	6	21.535	20.9493	21.0632	21.119	21.1389	21.5403	6	+	+	94.056	90340000	52	3.2303	-1.3138	0.000588432
223	F2HSV2	Cysteine synthase A	cysK BM28_A1955	21.1005	19.6857	21.2041	21.1956	19.3749	NaN	5	NaN	NaN	NaN	NaN	NaN	NaN	0	+	+	151.41	107300000	36	3.15721	6.08511	0.000696282
224	Q2YR98	Antifreeze protein, type I:Electron transfer flavoprotein, alpha subunit	etfA BAB1_1971	23.091	22.6156	23.5072	22.6007	22.3827	22.1416	6	22.708	22.6547	22.8624	22.3977	22.7338	22.8487	6			323.31	402450000	130	0.0366088	0.0222747	0.91916
225	Q2YR93	Uncharacterized protein	BAB1_1976	22.3682	21.8331	22.7371	NaN	22.7263	23.1406	5	NaN	NaN	NaN	22.2511	NaN	NaN	1	+	+	25.984	257270000	19	1.79274	6.28569	0.0161162
226	Q2YR88	Sodium:dicarboxylate symporter:Thioredoxin type domain:Thioredoxin domain 2	BAB1_1981	NaN	NaN	19.0013	NaN	NaN	NaN	1	NaN	20.1202	NaN	20.1993	20.261	20.1403	4			7.2547	36754000	15	1.20264	-3.68158	0.0627139
227	Q2YR85	Diaminopimelate decarboxylase (DAP decarboxylase) (DAPDC) (EC 4.1.1.20)	lysA BAB1_1984	20.7728	21.4308	20.6871	21.266	21.0695	21.3351	6	20.7003	20.9285	20.511	20.4407	20.4733	20.2676	6	+	+	63.581	101210000	52	2.20483	0.539949	0.00623972
228	Q2YR81	Histidinol-phosphate aminotransferase (EC 2.6.1.9) (Imidazole acetol-phosphate transaminase)	hisC BAB1_1988	20.5601	19.8202	21.2733	20.7211	19.5845	19.7958	6	18.8701	19.2012	19.204	19.0516	18.9756	19.5459	6	+	+	34.485	61456000	19	2.60796	1.15114	0.00246628
229	Q2YR76	Inorganic pyrophosphatase (EC 3.6.1.1) (Pyrophosphate phospho-hydrolase)	ppa BAB1_1993	22.6906	22.6246	23.0142	22.5723	22.2234	21.6591	6	22.3131	22.2208	22.1546	21.8029	22.2682	21.9711	6			51.43	372000000	124	0.886351	0.342274	0.129912
230	Q2YR63	Response regulator receiver:Transcriptional regulatory protein, C terminal	BAB1_2006	21.0645	20.2775	21.2245	19.713	19.5746	19.5896	6	19.5793	19.6396	20.1883	NaN	19.6459	19.9992	5			34.342	60830000	52	0.675075	1.53025	0.211312
231	Q2YR56	50S ribosomal protein L28	rpmB BAB1_2016	19.7198	19.6335	19.2787	20.2005	20.5647	NaN	5	21.4878	21.6345	22.2893	21.3408	21.2925	21.2404	6	+		66.608	139720000	63	1.45976	-2.77969	0.0346931
232	Q2YR49	Chaperonin clpA/B:ATP/GTP-binding site motif A (P-loop):Cobalt chelatase, pCobS small subunit	BAB1_2023	19.7711	NaN	19.6977	20.2923	18.7528	NaN	4	18.2333	18.4985	17.5576	NaN	17.7259	18.3184	5			10.972	30999000	21	0.0518324	0.231697	0.887498
233	F2HT14	Acetyl-coenzyme A carboxylase carboxyl transferase subunit alpha (ACCase subunit alpha) (Acetyl-CoA carboxylase carboxyltransferase subunit alpha) (EC 6.4.1.2)	accA BM28_A2017	22.9908	22.0937	23.6171	22.6901	21.6409	20.8809	6	20.6673	20.9516	20.2868	20.259	20.4278	21.4898	6	+	+	164.78	229620000	95	2.36527	1.63853	0.00431255
234	Q2YR33	Short-chain dehydrogenase/reductase SDR:Glucose/ribitol dehydrogenase (EC 1.1.1.100)	BAB1_2039	NaN	NaN	20.0689	19.9493	19.1438	18.8901	4	NaN	19.0242	18.5465	NaN	NaN	18.6801	3			59.313	30838000	13	0.345435	1.43189	0.451403
235	F2HT23	Uncharacterized protein	BM28_A2026	20.9304	22.1115	20.2563	20.8776	21.7655	21.0833	6	NaN	NaN	NaN	NaN	NaN	NaN	0	+	+	135.42	43979000	23	10.2893	7.96076	5.13671e-11
236	Q2YMQ2	Xylose isomerase (EC 5.3.1.5)	xylA BAB1_0570	13.9927	13.3537	13.6689	61	16.718	NaN	5	14.086	14.7403	13.5101	13.4281	14.2929	14.1718	6			323.31	914490000	193	0.00674639	-0.0116507	0.984586
237	Q2YMP8	NAD/NADP-dependent betaine aldehyde dehydrogenase (BADH) (EC 1.2.1.8)	betB BAB1_0576	21.2925	18.8708	21.4435	19.889	18.5081	NaN	5	19.6254	19.3762	19.424	19.2785	19.2556	20.8207	6			34.67	61734000	22	0.252817	-0.761056	0.558705
238	F2HT47	Addiction module antidote	BM28_A0571	21.8501	21.9812	21.8085	22.2003	22.6914	22.4554	6	NaN	NaN	NaN	NaN	NaN	NaN	0	+	+	194.65	109400000	47	13.5498	8.95447	2.81997e-14
239	Q2YMS0	Uncharacterized protein	BAB1_0587	24.7829	24.2877	22.9062	23.1734	24.4493	24.9091	6	25.2471	23.2472	24.417	24.7796	24.7671	25.5682	6			314.13	1026000000	151	0.607875	-0.586271	0.246675
240	Q2YMR8	ErfK/YbiS/YcfS/YnhG:Twin-arginine translocation pathway signal	BAB1_0589	21.1718	21.62	21.2672	21.2275	21.7093	22.0374	6	22.8737	22.9746	22.7336	22.8841	22.7345	22.8024	6	+	+	47.668	304330000	101	5.46156	-1.3283	3.4549e-06
241	F2HT55	Superoxide dismutase (EC 1.15.1.1)	BM28_A0579	23.4846	23.1892	24.1085	22.8225	22.9606	22.5552	6	23.6306	23.8298	23.6321	23.342	23.3026	23.6572	6			306.23	853500000	177	0.837651	-0.378949	0.145328
242	Q2YMR3	Transcriptional regulatory protein MucR	BAB1_0594	25.1365	24.4493	25.1174	24.4782	24.5927	24.0403	6	23.5686	24.0355	24.3494	23.5606	23.3644	24.0367	6	+	+	323.31	1064400000	154	2.2597	0.816544	0.00549923
243	Q2YMU3	Uncharacterized protein	BAB1_0599	19.0919	18.3339	19.2786	NaN	19.2305	NaN	4	18.7268	19.176	NaN	17.8256	19.0708	18.5314	5			19.164	29718000	18	0.180544	-0.697622	0.659866
244	Q2YMV2	Uncharacterized protein	BAB1_0627	NaN	23.1396	21.782	NaN	23.711	24.5148	4	22.597	23.0632	23.275	23.1583	23.4406	23.2863	6			13.301	534880000	42	0.774739	-3.20885	0.167981
245	F2HT96	Outer membrane lipoprotein-related protein	BM28_A0620	18.8631	20.5078	19.546	19.4763	20.0705	20.1487	6	20.8683	19.5414	20.8712	19.5311	20.7537	20.7374	6			95.716	98531000	48	0.923896	-0.615106	0.119153
246	Q2YMX6	Probable periplasmic serine endoprotease DegP-like (EC 3.4.21.107) (Protease Do)	htrA BAB1_0635	23.9298	24.3771	24.149	23.7084	24.2887	23.9537	6	25.1972	25.0806	24.4327	24.9458	24.7864	24.8894	6	+	+	323.31	1275400000	406	3.58811	-0.820927	0.000258163
247	Q2YM13	50S ribosomal protein L10	rplJ BAB1_1266	22.6567	21.4593	22.9525	21.5955	21.3385	21.3442	6	22.1745	22.5462	21.743	22.2107	21.8672	22.2576	6			153.74	418630000	101	0.335143	-0.242069	0.462229
248	Q2YM12	50S ribosomal protein L1	rplA BAB1_1267	22.7746	20.9777	22.3225	22.4064	21.2586	21.1587	6	23.1043	23.3181	23.5559	23.2331	23.103	23.1803	6	+	+	160.41	503040000	143	2.9054	-1.43271	0.00124338
249	Q2YM11	50S ribosomal protein L11	rplK BAB1_1268	22.9987	21.7265	22.6756	22.2937	21.599	21.4597	6	21.7353	21.7576	22.1394	21.8535	21.7848	21.974	6			112.22	400030000	142	0.43914	0.251415	0.363798
250	Q2YM10	Transcription termination/antitermination protein NusG	nusG BAB1_1269	23.4904	21.6986	23.3911	22.2314	21.5719	21.3497	6	21.1846	21.5595	21.2341	21.3541	21.2674	21.2027	6	+		137.68	300050000	77	1.54021	0.988459	0.0288261
251	Q2YQH0	CBS domain	BAB1_1274	24.9021	25.6681	26.262	25.9866	26.4689	26.9488	6	27.6353	27.2492	27.0757	27.1802	27.2602	27.6372	6	+	+	323.31	5670700000	454	2.78638	-1.30019	0.0016354
252	Q2YQG1	Bacterial transferase hexapeptide repeat	BAB1_1279	NaN	NaN	NaN	NaN	NaN	NaN	0	21.0845	22.1669	22.4484	22.8763	22.5359	21.3548	6	+	+	73.44	158310000	52	10.5021	-8.8678	3.14723e-11
253	F2HTC1	Uncharacterized protein	BM28_A1271	20.3659	20.7919	20.7506	20.5906	20.5668	20.3143	6	21.1472	21.2479	21.1347	21.1617	21.0787	21.4186	6	+	+	42.577	111020000	51	4.31815	-0.634808	4.80677e-05
254	Q2YQG4	Alpha/beta hydrolase fold:Esterase/lipase/thioesterase, active site:Prolyl aminopeptidase S33:Alpha/beta hydrolase	BAB1_1282	19.8727	NaN	19.7471	18.9168	18.4691	NaN	4	NaN	NaN	NaN	NaN	NaN	18.394	1			9.4295	18343000	7	1.16064	3.16361	0.0690816
255	Q2YQG2	Uncharacterized protein	BAB1_1283	NaN	20.5045	NaN	NaN	20.0366	20.1416	3	20.7032	NaN	20.6348	20.0383	20.4706	20.9968	5			7.48	56982000	15	0.661094	-2.62352	0.218226
256	Q2YM78	Glyoxalase/Bleomycin resistance protein/dioxygenase domain:Glyoxalase I (EC 4.4.1.5)	gloA BAB1_1286	23.5497	24.8139	23.2605	24.666	25.0824	25.4761	6	25.8304	25.8171	26.1602	25.7843	25.9984	25.5484	6	+	+	323.31	2066500000	304	2.42344	-1.38168	0.0037719
257	Q2YM75	Fructose-1,6-bisphosphatase	glpX BAB1_1292	20.5698	NaN	20.9053	20.0002	18.896	19.3152	5	NaN	19.148	19.0953	NaN	NaN	NaN	2			28.122	47228000	14	1.23144	3.63554	0.0586898
258	F2HTD6	Homoserine dehydrogenase (EC 1.1.1.3)	BM28_A1286	20.8097	19.4217	21.447	19.8598	19.1763	18.8023	6	19.0296	19.4567	18.7302	18.9868	19.377	19.1542	6			50.372	57434000	20	1.03051	0.797022	0.0932165
259	F2HTD8	Uncharacterized protein	BM28_A1288	21.1112	22.9783	21.5702	21.9759	22.6671	22.1569	6	22.7607	22.8431	22.7799	22.57	23.012	22.4612	6	+		294.96	459260000	111	1.32715	-0.661222	0.0470819
260	Q2YRG3	Uncharacterized protein	BAB1_1297	20.1857	19.3344	19.5371	20.834	20.0804	19.8772	6	19.0223	20.6706	20.5148	20.2807	19.7654	20.3079	6			18.591	69508000	43	0.139243	-0.118807	0.725699
261	Q2YRG0	Methionine aminopeptidase (MAP) (MetAP) (EC 3.4.11.18) (Peptidase M)	map BAB1_1300	20.5282	19.353	21.03	19.4599	19.6557	19.7666	6	20.3106	20.633	20.255	20.7381	20.1739	20.824	6			84.434	84901000	45	0.976618	-0.523538	0.105531
262	F2HTF1	Uncharacterized protein	BM28_A1301	18.2617	19.3567	NaN	NaN	NaN	19.994	3	21.0976	21.5059	21.1166	20.9511	20.9541	21.2512	6	+	+	129.73	69456000	46	2.33347	-4.93902	0.00464014
263	Q2YQK5	Dynamin:ATP/GTP-binding site motif A (P-loop):Cobalamin synthesis protein/P47K	BAB1_1327	21.274	19.2639	21.7612	20.352	19.7742	19.0875	6	17.3233	NaN	NaN	17.2565	18.0003	18.0866	4	+	+	44.823	43824000	18	2.51762	4.07098	0.00303654
264	Q2YQK0	Acyl-CoA dehydrogenase:Acyl-CoA dehydrogenase, C-terminal:Acyl-CoA dehydrogenase, central domain:Acyl-CoA dehydrogenase, N-te (EC 1.3.99.2)	BAB1_1333	19.8095	19.1825	21.0687	19.8473	NaN	NaN	4	18.7115	NaN	NaN	NaN	NaN	NaN	1			21.378	27380000	8	1.20484	3.59443	0.0623971
265	Q2YQJ7	Uncharacterized protein	BAB1_1336	NaN	21.007	21.0143	NaN	21.9745	22.4893	4	24.6096	24.635	24.7973	24.0741	25.0429	24.5436	6	+	+	50.966	1238500000	64	2.04778	-5.79954	0.00895822
266	F2HTJ0	ABC transporter periplasmic substrate-binding protein	BM28_A2038	20.8006	20.6003	NaN	21.0113	20.9788	21.1719	5	NaN	NaN	NaN	NaN	NaN	NaN	0	+	+	57.37	94878000	21	3.26358	6.41882	0.000545036
267	Q2YR15	ParB-like nuclease:ParB-like partition protein	BAB1_2059	21.5575	20.1857	21.8386	21.6518	20.5118	20.067	6	19.6026	19.4317	20.1279	19.5859	19.7357	19.7921	6	+	+	35.677	115820000	48	2.37335	1.25608	0.00423298
268	Q2YR09	Transcription termination factor Rho (EC 3.6.4.-) (ATP-dependent helicase Rho)	rho BAB1_2065	23.3299	21.8378	23.3268	22.6319	21.815	20.9314	6	20.909	20.387	20.5888	20.8326	20.3287	20.9622	6	+	+	281.61	337440000	164	2.64111	1.64408	0.00228503
269	P0C126	Protein-export protein SecB	secB BAB1_2073	22.7092	21.4595	22.7844	21.6384	20.9682	20.7942	6	22.6545	22.2509	22.4797	22.5513	22.4388	22.9343	6	+		137.23	450890000	173	1.35293	-0.825914	0.0443676
270	Q2YQZ3	ATP-dependent protease subunit HslV (EC 3.4.25.2)	hslV BAB1_2081	20.2291	21.0214	20.7215	19.9806	20.5031	20.8399	6	20.8157	20.8458	20.6554	21.4764	20.5214	20.8537	6			62.303	88351000	46	0.782058	-0.31214	0.165174
271	F2HTM4	Imidazole glycerol phosphate synthase subunit HisF (EC 4.1.3.-) (IGP synthase cyclase subunit) (IGP synthase subunit HisF) (ImGP synthase subunit HisF)	hisF BM28_A2072	18.707	NaN	18.3387	18.6299	NaN	NaN	3	19.3689	19.2554	19.3153	19.6291	19.8283	19.4703	6	+	+	7.0208	35144000	17	1.87028	-3.59362	0.013481
272	Q2YQY7	Phosphoribosyl-ATP pyrophosphatase (PRA-PH) (EC 3.6.1.31)	hisE BAB1_2087	NaN	NaN	19.238	18.4456	19.0215	18.9357	4	NaN	NaN	18.8781	18.8605	18.9276	19.1071	4			16.652	26923000	14	0.00439243	-0.0220874	0.989937
273	Q2YQY4	Response regulator receiver:Transcriptional regulatory protein, C terminal	BAB1_2092	23.6227	19.1404	22.5136	19.2692	21.3188	19.6072	6	20.5991	18.9666	20.0916	20.2522	19.5709	21.2814	6			37.286	149450000	41	0.433511	0.784996	0.368544
274	Q2YQY2	ATP/GTP-binding site motif A (P-loop)	BAB1_2094	21.3697	22.0646	21.229	21.628	22.0426	21.2755	6	22.4206	22.5236	22.1937	22.8192	22.651	22.6388	6	+	+	114.13	220760000	94	3.45873	-0.939554	0.000347756
275	Q2YQY0	PTS system fructose subfamily IIA component (EC 2.7.1.69)	BAB1_2096	19.6293	NaN	19.7767	19.6886	NaN	19.1712	4	NaN	19.3544	19.1221	18.9009	NaN	19.6311	4			17.111	32550000	21	0.0398996	0.209553	0.912222
276	Q2YQX0	Thioredoxin	trx-1 BAB1_2107	23.8317	23.9526	23.7477	24.2469	23.5808	23.7087	6	24.0365	24.2911	24.5195	24.3177	24.2561	23.7236	6	+		323.31	1236100000	237	1.38924	-0.345996	0.0408091
277	F2HTP4	Acetyl-coenzyme A carboxylase carboxyl transferase subunit beta (ACCase subunit beta) (Acetyl-CoA carboxylase carboxyltransferase subunit beta) (EC 6.4.1.2)	accD BM28_A2092	21.0639	18.3708	21.911	18.5302	18.0706	NaN	5	NaN	18.9354	NaN	NaN	18.0745	19.1608	3			109.67	57406000	14	0.754584	2.55931	0.175961
278	F2HTQ5	2-hydroxymuconic semialdehyde hydrolase	BM28_A2103	18.8831	18.5082	20.1604	NaN	18.3375	NaN	4	NaN	NaN	NaN	NaN	NaN	18.1165	1			11.609	22550000	6	1.15824	3.0238	0.0694639
279	F2HTQ7	Translation initiation factor IF-3	infC BM28_A2105	23.946	24.5986	23.5992	24.9168	24.9112	24.5177	6	24.6512	25.1249	25.0953	24.9821	24.5574	24.2133	6			46.305	1369600000	158	0.686555	-0.355767	0.2058
280	Q2YQV8	50S ribosomal protein L35	rpmI BAB1_2123	19.5528	19.6707	19.6946	NaN	19.6941	19.7084	5	19.8417	19.6766	20.1241	20.1646	19.9068	19.7332	6			47.258	56502000	38	0.60301	-1.31942	0.249454
281	Q2YQV7	50S ribosomal protein L20	rplT BAB1_2124	21.6756	21.4254	21.636	21.0128	20.763	21.9663	6	22.3487	22.5524	22.8792	22.8347	21.8418	22.0373	6	+	+	101.42	322470000	84	2.59193	-1.00251	0.00255902
282	F2HTR2	DNA polymerase III subunit beta (EC 2.7.7.7)	dnaN BM28_A0002	23.4898	22.4132	23.6959	22.6284	22.2202	22.1124	6	22.3213	22.4869	21.9706	22.0896	22.0624	22.108	6			207.54	359490000	166	1.1757	0.586847	0.0667264
283	Q2YPM2	NAD binding site:UBA/THIF-type NAD/FAD binding fold:Aromatic-ring hydroxylase	BAB1_0004	18.3253	17.4976	19.9412	18.0852	17.7089	NaN	5	NaN	NaN	NaN	NaN	NaN	NaN	0	+	+	14.989	12583000	2	3.02091	4.25138	0.000952989
284	Q2YPM1	Pyridine nucleotide-disulphide oxidoreductase, class I:D-isomer specific 2-hydroxyacid dehydrogenase, NAD binding domain	BAB1_0005	21.5883	20.1195	21.2974	19.6191	20.0708	NaN	5	NaN	NaN	NaN	NaN	NaN	19.0268	1	+	+	17.665	54844000	10	2.04533	5.13806	0.00900877
285	F2HTS0	Extracellular solute-binding protein family 5	BM28_A0010	20.3544	18.6038	20.2979	19.9016	18.951	18.7683	6	19.3185	19.1913	18.7948	19.5338	19.2754	19.2088	6			44.769	40263000	27	0.334361	0.259083	0.463062
286	F2HTS3	Extracellular ligand-binding receptor	BM28_A0013	22.9033	22.8147	23.2514	23.0124	22.9955	22.9964	6	NaN	NaN	NaN	NaN	NaN	NaN	0	+	+	323.31	414260000	142	unendlich	9.78561	0
287	Q2YPN9	Biotin/lipoyl attachment:Biotin-requiring enzyme, attachment site:Carbamoyl-phosphate synthase L chain, ATP-binding:Carbamoyl (EC 6.4.1.4)	BAB1_0018	20.8202	19.5684	21.7207	19.8402	19.5253	NaN	5	19.4582	19.7272	19.5564	19.6981	19.5709	19.8435	6			25.881	61504000	9	0.169251	-0.528286	0.67725
288	F2HTS9	Ivd, isovaleryl-CoA dehydrogenase	BM28_A0019	25.2019	24.127	25.7701	25.1946	24.3298	23.6608	6	22.5393	22.7146	22.3411	22.5305	22.7667	22.7627	6	+	+	323.31	1267300000	274	4.06106	2.10489	8.68846e-05
289	Q2YPN7	Brucella melitensis biovar Abortus 2308 chromosome I, complete sequence, strain 2308	BAB1_0022	23.8422	25.4958	24.0136	24.5527	24.7464	24.736	6	25.1098	24.7343	25.2673	24.9875	24.9744	24.285	6			129.17	1647800000	135	0.572127	-0.328598	0.267839
290	Q2YPN6	3-phosphoshikimate 1-carboxyvinyltransferase (EC 2.5.1.19) (5-enolpyruvylshikimate-3-phosphate synthase) (EPSP synthase) (EPSPS)	aroA BAB1_0023	20.3351	NaN	20.82	19.7081	19.0894	NaN	4	18.3551	18.7256	18.0617	18.1714	17.6747	18.2196	6			23.397	39848000	12	0.123722	-0.472584	0.752104
291	F2HTT9	30S ribosomal protein S1	rpsA BM28_A0029	23.4762	22.3292	23.9454	23.4628	22.5298	21.6084	6	22.155	22.1314	22.6967	22.1575	22.2007	22.3734	6			196.57	542880000	175	0.877268	0.606183	0.132658
292	Q2YPQ5	3-deoxy-manno-octulosonate cytidylyltransferase (EC 2.7.7.38) (CMP-2-keto-3-deoxyoctulosonic acid synthase) (CKS) (CMP-KDO synthase)	kdsB BAB1_0035	18.6308	17.0219	17.934	18.2923	NaN	NaN	4	NaN	17.5385	NaN	17.5626	NaN	17.6847	3			5.075	13110000	8	0.296166	0.980528	0.505631
293	Q2YPP8	Bacterial surface antigen (D15)	BAB1_0045	21.2286	22.5277	21.5201	22.0335	22.2659	22.1523	6	22.1408	22.1303	22.1045	22.0296	21.98	22.122	6			126.16	214040000	144	0.274141	-0.129888	0.531936
294	Q2YPP7	Uncharacterized protein	BAB1_0046	21.6664	22.1065	21.321	21.8773	21.917	21.5722	6	22.1861	21.8665	21.5991	22.1666	21.9402	22.189	6			206.05	217430000	112	0.889343	-0.247876	0.12902
295	Q2YPP2	Uncharacterized protein	BAB1_0051	21.9137	23.3456	22.3328	22.4815	22.5889	22.6422	6	23.5002	23.5407	23.3214	23.3966	23.4442	23.154	6	+	+	254.23	523160000	224	2.74759	-0.842075	0.00178818
296	F2HTW8	Glyoxalase/bleomycin resistance protein/dioxygenase	BM28_A0058	21.4198	22.7098	20.9635	21.9687	22.4312	22.438	6	NaN	NaN	NaN	NaN	NaN	NaN	0	+	+	68.704	104510000	37	10.6467	8.7785	2.25575e-11
297	Q2YPS4	Phosphoglucomutase/phosphomannomutase:Phosphogluc omutase/phosphomannomutase C terminal:Phosphoglucomutase/phosphomannomutase (EC 5.4.2.2)	pgm BAB1_0055	18.8181	19.3773	18.7371	NaN	NaN	NaN	3	18.8888	19.8201	NaN	NaN	18.8572	19.8419	4			16.761	19623000	13	0.279918	-1.21092	0.524907
298	Q2YPS1	Esterase/lipase/thioesterase, active site	BAB1_0058	NaN	NaN	NaN	NaN	NaN	NaN	0	23.9694	24.0513	23.9462	24.1696	23.9738	23.7524	6	+	+	248.48	296270000	78	18.4481	-10.7671	3.56358e-19
299	Q2YPR8	Uncharacterized protein	BAB1_0061	21.485	22.5002	21.1424	21.8084	22.6909	22.5429	6	21.2354	20.6348	21.7294	21.4507	21.3854	21.344	6	+		73.42	189750000	112	1.45112	0.731682	0.0353897
300	Q2YPR6	Uncharacterized protein	BAB1_0063	23.127	24.7439	23.0324	23.9114	24.0896	24.4285	6	24.2361	NaN	23.8438	23.665	23.9253	23.4666	5			28.373	686390000	77	0.479215	1.83097	0.33173
301	Q2YMW6	NAD binding site:ATP/GTP-binding site motif A (P-loop):Aromatic-ring hydroxylase:Electron transfer flavoprotein-ubiquinone ox (EC 1.5.5.1)	BAB1_0645	19.7965	20.1653	20.3872	19.5173	19.6086	19.2695	6	18.0721	18.4785	18.5321	18.5829	18.5993	18.614	6	+	+	35.821	39306000	26	4.36937	1.31095	4.27198e-05
302	Q2YMW4	AMP nucleosidase (EC 3.2.2.4)	amn BAB1_0647	21.3586	20.6475	21.2086	19.4507	19.2114	NaN	5	18.265	18.4972	18.0029	18.4964	NaN	18.706	5			83.718	43600000	25	0.518479	1.65155	0.303055
303	Q2YMW1	Uncharacterized protein	BAB1_0650	21.1971	22.7896	21.1437	22.226	22.9987	21.6618	6	17.4586	NaN	16.5367	17.0914	17.9813	18.0699	5	+	+	189.03	283940000	74	4.17664	5.27817	6.65825e-05
304	F2HU01	Uncharacterized protein	BM28_A0646	21.8296	22.2451	21.9925	22.4431	22.2244	21.9101	6	22.7631	23.0115	22.9668	22.9474	22.6949	22.9937	6	+	+	79.5	304490000	115	4.5167	-0.788758	3.043e-05
305	Q2YMZ0	Aminotransferase, class-II:Aminotransferase, class I and II (EC 2.6.1.9)	BAB1_0657	21.2385	20.3237	20.595	19.7983	20.2035	19.5202	6	19.7005	20.0124	19.5488	19.2182	19.2544	20.3924	6			10.384	68309000	25	1.07389	0.592101	0.0843543
306	Q2YMY7	Porin Omp2b	omp2b BAB1_0660	22.2332	23.7363	22.0031	23.3761	23.2562	23.3411	6	25.5182	25.2571	25.6621	25.7908	25.8224	25.6912	6	+	+	323.31	1480700000	354	5.30947	-2.63262	4.90377e-06
307	F2HU12	4-hydroxy-tetrahydrodipicolinate synthase (HTPA synthase) (EC 4.3.3.7)	dapA BM28_A0657	23.243	24.1325	22.7625	23.8803	23.204	24.1237	6	NaN	NaN	NaN	NaN	NaN	NaN	0	+	+	30.151	213240000	18	12.1171	10.3477	7.63611e-13
308	Q2YN14	Uncharacterized protein	BAB1_0669	20.9864	22.639	21.2157	21.4905	22.5519	22.5349	6	22.1804	22.8256	23.0237	22.8149	22.4068	22.4204	6			51.781	275800000	55	1.21891	-0.708879	0.0604069
309	Q2YN12	DNA-directed RNA polymerase subunit omega (RNAP omega subunit) (EC 2.7.7.6) (RNA polymerase omega subunit) (Transcriptase subunit omega)	rpoZ BAB1_0671	21.6146	22.9671	21.5461	21.9139	22.0083	21.5654	6	21.4836	21.0971	22.399	21.6232	21.459	21.6469	6			59.262	200860000	80	0.543192	0.317734	0.286291
310	Q2YN10	Orotate phosphoribosyltransferase (OPRT) (OPRTase) (EC 2.4.2.10)	pyrE BAB1_0673	20.5374	19.233	20.511	NaN	19.0574	NaN	4	NaN	NaN	NaN	NaN	NaN	NaN	0	+	+	17.018	28587000	13	1.95748	4.41648	0.0110286
311	Q2YN04	Holo-[acyl-carrier-protein] synthase (Holo-ACP synthase) (EC 2.7.8.7) (4'-phosphopantetheinyl transferase AcpS)	acpS BAB1_0679	19.8342	21.514	19.5201	19.7542	20.6125	20.506	6	20.5722	20.1252	20.4712	20.7127	20.2649	20.811	6			71.697	73497000	24	0.266652	-0.202692	0.541188
312	F2HU26	Signal peptidase I (EC 3.4.21.89)	BM28_A0671	20.5488	19.3804	NaN	NaN	19.6297	NaN	3	19.1885	19.4222	18.8927	18.9963	NaN	NaN	4			32.5	34649000	15	0.121446	-0.621816	0.756055
313	F2HU33	Dihydroorotase (DHOase) (EC 3.5.2.3)	pyrC BM28_A0678	19.7533	21.7852	19.9242	20.4716	21.0863	21.3768	6	NaN	NaN	NaN	NaN	NaN	NaN	0	+	+	24.498	54645000	13	9.18572	7.52289	6.52045e-10
314	F2HU40	Uncharacterized protein	BM28_A0685	22.5252	23.8899	23.1294	23.2706	23.137	22.9787	6	21.4233	21.0696	20.4509	20.2906	21.1006	20.2991	6	+	+	20.067	238930000	55	5.32974	2.38278	4.6802e-06
315	Q2YN49	Peptidyl-prolyl cis-trans isomerase, putative	BAB1_0706	22.3388	22.903	22.1111	22.2438	22.1587	22.6706	6	23.2471	23.3764	23.2031	23.3601	23.086	23.3969	6	+	+	321.52	391130000	143	4.07276	-0.873916	8.45751e-05
316	Q2YN45	Probable cytosol aminopeptidase (Leucine aminopeptidase) (Leucyl aminopeptidase)	pepA BAB1_0710	26.6855	27.6091	26.6223	27.3431	27.6059	27.4523	6	28.1043	28.0736	28.0256	28.0399	28.123	27.8671	6	+	+	323.31	9807500000	1067	2.8536	-0.819215	0.00140088
317	Q2YN37	Molybdopterin synthase sulfur carrier subunit	moaD BAB1_0718	21.1398	22.1425	21.0644	21.1291	21.4016	21.1401	6	21.3171	20.9261	21.0947	20.9128	20.7957	20.8212	6			20.004	117980000	64	1.0789	0.35832	0.0833879
318	F2HU67	Uncharacterized protein	BM28_A1334	NaN	20.8815	19.1491	NaN	20.6136	21.4129	4	NaN	NaN	NaN	NaN	NaN	19.3449	1			114.16	116950000	36	1.17299	3.84703	0.0671437
319	F2HU70	Bifunctional preprotein translocase subunit SecD/SecF	BM28_A1337	21.5327	20.2792	22.362	21.4987	20.3493	19.924	6	NaN	NaN	NaN	NaN	NaN	NaN	0	+	+	185.73	107390000	35	8.69333	7.78099	2.02616e-09
320	F2HU77	Sulfate ABC transporter sulfate-binding protein	BM28_A1344	22.8322	24.1029	24.3509	24.298	24.0969	23.7818	6	NaN	NaN	NaN	NaN	NaN	NaN	0	+	+	309.26	332880000	40	12.2836	10.7004	5.20473e-13
321	Q2YQE7	RbsD or FucU transport	fucU BAB1_1356	24.0906	24.8046	23.6772	24.734	24.9064	24.251	6	24.694	24.2601	24.8061	24.578	24.9971	24.5032	6			20.359	1166500000	121	0.482639	-0.229101	0.329125
322	F2HU89	Periplasmic binding protein/LacI transcriptional regulator	BM28_A1356	24.4118	25.8834	24.8769	26.119	25.6591	27.1916	6	24.002	24.374	24.3367	24.3115	24.2039	24.0019	6	+	+	323.31	1557900000	323	2.3654	1.48531	0.00431125
323	Q2YQD0	TonB-dependent receptor protein	BAB1_1367	18.947	19.2552	NaN	19.6491	19.4184	NaN	4	20.5686	NaN	20.6687	20.7144	21.0493	20.2002	5			22.054	90469000	30	0.578086	-2.12026	0.264188
324	F2HUA9	Cobalt ABC transporter periplasmic binding protein CbiN	BM28_A1376	23.3856	24.9365	23.6739	24.4243	24.9402	24.788	6	25.8605	26.1149	26.0584	25.5643	25.9013	25.2433	6	+	+	323.31	1551500000	273	3.0557	-1.43237	0.000879632
325	Q2YQP2	Putative fluoride ion transporter CrcB	crcB BAB1_1389	17.8607	17.876	18.4488	17.7073	NaN	NaN	4	20.2295	20.6318	19.866	19.7499	18.8628	19.1268	6	+	+	6.8899	22758000	12	2.03304	-3.359	0.00926736
326	Q2YQN9	Uncharacterized protein	BAB1_1392	22.9298	24.2528	23.8212	22.9463	23.9897	24.2633	6	24.1048	24.3187	23.2481	23.9341	23.9183	24.2909	6			323.31	863340000	237	0.411819	-0.268611	0.387419
327	Q2YQN2	Ketol-acid reductoisomerase (EC 1.1.1.86) (Acetohydroxy-acid isomeroreductase) (Alpha-keto-beta-hydroxylacyl reductoisomerase)	ilvC BAB1_1399	19.9924	21.7367	20.0147	19.9936	20.2588	19.8577	6	20.8672	NaN	20.542	20.6044	NaN	19.4057	4			33.418	65797000	17	0.790043	2.33578	0.162165
328	F2HUD3	Acetolactate synthase (EC 2.2.1.6)	ilvB BM28_A1400	18.5316	NaN	18.2291	18.2095	NaN	19.239	4	17.8876	18.5174	18.3702	NaN	18.8929	18.7737	5			46.583	93351000	36	0.240297	-0.837069	0.575047
329	Q2YS27	Serine proteases, V8 family:Serine protease, trypsin family:PDZ/DHR/GLGF domain:HtrA/DegQ protease:Glucose/ribitol dehydrogenase (EC 3.4.21.-)	BAB1_1413	19.0708	19.2145	19.1415	19.2434	18.8531	NaN	5	19.1948	19.928	19.1788	18.7858	19.2967	19.7563	6			23.674	28298000	18	0.611401	-1.23455	0.24468
330	Q2YS25	Protein HflC	hflC BAB1_1415	20.6543	20.0182	20.7498	19.7962	19.4729	NaN	5	19.6718	NaN	NaN	19.3926	NaN	19.2867	3			136.18	54119000	32	0.753973	2.65339	0.176208
331	Q2YS24	Band 7 protein:Stomatin	BAB1_1416	21.8045	21.0445	22.5196	21.6236	20.5166	19.502	6	20.0577	19.9369	19.9992	20.1016	19.364	20.7466	6	+		62.134	117930000	47	1.43779	1.13414	0.0364927
332	Q2YQV5	Phenylalanine--tRNA ligase alpha subunit (EC 6.1.1.20) (Phenylalanyl-tRNA synthetase alpha subunit) (PheRS)	pheS BAB1_2126	18.5875	18.699	18.67	18.6539	18.8441	NaN	5	18.464	18.6181	18.8261	18.7757	18.9389	NaN	5			5.7374	32469000	6	0.00735822	-0.0280253	0.9832
333	Q2YQV2	Chaperone protein DnaK (HSP70) (Heat shock 70 kDa protein) (Heat shock protein 70)	dnaK BAB1_2129	26.5295	25.8017	26.724	26.0573	25.6529	24.9369	6	25.6925	25.5407	25.667	25.47	25.6766	25.9087	6			323.31	4181200000	820	0.512533	0.291134	0.307233
334	F2HUF3	Regucalcin	BM28_A2119	20.1808	18.6145	20.7785	19.1755	18.7688	NaN	5	18.715	18.644	18.828	19.0048	18.7512	18.7949	6			11.364	36173000	12	0.114684	-0.334971	0.76792
335	F2HUF4	Glutathione synthetase (EC 6.3.2.3) (GSH synthetase) (Glutathione synthase)	gshB BM28_A2120	20.8773	19.884	21.7242	20.2822	20.0869	19.6237	6	19.9748	20.2805	19.8526	19.5548	NaN	19.9045	5			17.046	105920000	15	0.709664	1.61684	0.195136
336	Q2YQU1	Brucella melitensis biovar Abortus 2308 chromosome I, complete sequence, strain 2308	BAB1_2141	24.5693	26.0568	24.546	25.2791	25.7394	26.1298	6	25.162	25.1871	24.9941	25.027	25.1013	25.0507	6			323.31	1792200000	473	0.484817	0.299662	0.327478
337	Q2YQT7	Phosphate-specific transport system accessory protein PhoU	phoU BAB1_2145	18.9454	18.629	19.5972	18.8607	NaN	NaN	4	NaN	NaN	NaN	NaN	NaN	NaN	0	+	+	3.6159	18555000	5	1.9815	3.86537	0.0104351
338	F2HUG7	Lipoprotein	BM28_A2133	20.9044	22.6172	20.7867	NaN	21.5821	NaN	4	20.9527	22.2337	21.119	21.4072	21.356	21.7355	6			20.273	119230000	24	0.818509	-2.74896	0.151877
339	F2HUG9	DNA starvation/stationary phase protection protein Dps	BM28_A2135	25.112	27.1476	24.6624	25.4786	26.5169	26.4175	6	19.1641	NaN	NaN	NaN	NaN	NaN	1	+	+	302.09	1089900000	47	6.16826	11.6868	6.78798e-07
340	Q2YQR9	Transcription termination/antitermination protein NusA	nusA BAB1_2163	24.1173	21.8988	24.1688	24.093	23.2673	23.117	6	21.1396	22.576	21.5833	21.4717	21.848	21.9942	6	+	+	113.42	511670000	90	2.62769	1.67487	0.00235675
341	Q2YQR7	Translation initiation factor IF-2	infB BAB1_2165	22.9479	21.5772	23.7469	22.1035	20.9456	20.0813	6	20.1555	20.2337	21.0329	19.586	20.1441	20.6587	6	+	+	251.07	276660000	97	1.69266	1.59858	0.0202929
342	P0C0Z6	30S ribosomal protein S15	rpsO BAB1_2168	20.2445	19.8695	18.9794	21.2709	21.2344	21.0055	6	20.3047	21.1847	20.9463	20.7633	20.3105	NaN	5			53.559	86948000	43	0.326567	0.980767	0.471447
343	Q2YQR3	Polyribonucleotide nucleotidyltransferase (EC 2.7.7.8) (Polynucleotide phosphorylase) (PNPase)	pnp BAB1_2169	23.4964	22.4688	23.5906	23.1258	22.2474	21.1221	6	21.9145	21.9715	21.7791	21.6194	21.6906	22.0153	6			323.31	441570000	171	1.26733	0.843429	0.0540347
344	Q2YQR0	Enoyl-[acyl-carrier-protein] reductase [NADH] (EC 1.3.1.9)	fabI-2 BAB1_2172	21.6694	19.6633	21.2027	20.498	20.38	20.2992	6	19.0915	19.2914	19.3466	19.9728	19.6147	20.4131	6	+	+	123.55	94345000	40	1.74187	0.9971	0.0181188
345	Q2YQQ9	Beta-ketoacyl synthase (EC 2.3.1.41)	fabB BAB1_2173	26.5786	27.3621	26.6381	27.2791	27.9136	27.8761	6	27.6093	27.3201	27.8359	27.6798	27.6731	27.0531	6			323.31	8683800000	937	0.446395	-0.253937	0.357771
346	Q2YQQ8	3-hydroxydecanoyl-[acyl-carrier-protein] dehydratase (EC 4.2.1.59) (3-hydroxyacyl-[acyl-carrier-protein] dehydratase FabA) (Beta-hydroxydecanoyl thioester dehydrase) (Trans-2-decenoyl-[acyl-carrier-protein] isomerase) (EC 5.3.3.14)	fabA BAB1_2174	20.8063	19.5458	20.2295	19.4947	19.2891	NaN	5	20.3162	18.3709	18.9561	18.8496	18.5782	19.5246	6			47.202	50035000	19	0.108139	-0.336675	0.779581
347	Q2YQQ2	NLP/P60	BAB1_2180	20.2139	18.5075	19.7888	19.3666	18.94	NaN	5	18.8459	18.6053	18.3095	18.9027	18.5677	19.5208	6			61.752	31797000	33	0.167676	-0.454189	0.679711
348	F2HUK3	Leucine aminopeptidase 2, chloroplastic (EC 3.4.11.-) (EC 3.4.11.1) (Leucine aminopeptidase 3, chloroplastic)	BM28_A2169	22.6935	23.6882	22.6492	23.3601	23.2271	22.9581	6	NaN	NaN	NaN	NaN	NaN	NaN	0	+	+	154.04	239300000	107	13.3864	9.88605	4.10783e-14
349	Q2YQP6	30S ribosomal protein S20	rpsT BAB1_2186	21.3083	22.0573	22.2448	22.3554	22.3895	21.8472	6	22.0116	22.1964	22.7267	22.2568	22.3079	21.9632	6			109.62	284890000	111	0.49476	-0.209992	0.320066
350	Q2YPQ8	Argininosuccinate synthase (EC 6.3.4.5) (Citrulline--aspartate ligase)	argG BAB1_0071	21.6442	19.5412	22.5778	19.9576	19.7377	19.7348	6	19.4548	19.1966	18.7892	19.1971	19.0541	18.7657	6	+	+	178.99	138690000	56	1.69573	1.45597	0.0201499
351	Q2YNV2	Uncharacterized protein	BAB1_0075	23.2069	22.483	22.7882	22.4105	22.4312	22.8476	6	23.6315	23.4853	23.4371	23.3981	22.9906	23.7222	6	+	+	236.35	569860000	136	2.98036	-0.749558	0.00104625
352	Q2YNV0	Putative pterin-4-alpha-carbinolamine dehydratase (PHS) (EC 4.2.1.96) (4-alpha-hydroxy-tetrahydropterin dehydratase) (Pterin carbinolamine dehydratase) (PCD)	BAB1_0077	NaN	20.6775	NaN	NaN	20.2362	20.5401	3	20.3193	NaN	19.7926	20.3453	20.3975	20.0453	5			15.849	33640000	25	0.517694	-2.17102	0.303603
353	Q2YNW9	Dihydroxy-acid dehydratase (DAD) (EC 4.2.1.9)	ilvD BAB1_0096	21.5681	22.5744	21.918	21.6804	22.2611	21.8472	6	21.3947	21.5031	21.4571	20.694	21.2739	20.7804	6	+	+	225.39	178430000	94	2.41197	0.790997	0.00387281
354	Q2YNW5	Transcriptional regulator, putative	BAB1_0100	20.753	NaN	20.8174	21.3844	21.7625	22.2393	5	22.4783	22.2121	22.39	22.5334	21.9535	22.4617	6			131.21	258510000	54	0.89812	-2.31038	0.126439
355	F2HUP5	Formate/nitrite transporter	BM28_A0112	NaN	NaN	NaN	NaN	NaN	NaN	0	24.6844	23.9086	25.0128	25.0503	25.2196	24.7533	6	+	+	180.55	682540000	122	13.4442	-11.5615	3.59567e-14
356	F2HUP7	Uncharacterized protein	BM28_A0114	24.5031	23.4644	24.7085	22.0087	23.0808	20.1183	6	19.314	19.1434	18.8828	19.0707	18.4077	19.0165	6	+	+	53.439	294580000	28	3.66473	4.00812	0.000216408
357	Q2YNY6	Short-chain dehydrogenase/reductase SDR:Glucose/ribitol dehydrogenase	BAB1_0113	21.156	19.0279	21.1413	19.4518	NaN	18.7237	5	20.1901	20.101	20.0622	20.3457	20.3873	20.5581	6			125.97	76766000	41	0.616734	-1.48894	0.241694
358	Q2YNY3	Outer membrane protein, putative	BAB1_0116	23.1068	24.0816	22.7933	23.7941	23.6413	24.1588	6	24.8387	24.8595	25.5123	25.2692	25.2017	25.3437	6	+	+	323.31	989900000	210	4.08164	-1.57487	8.28624e-05
359	F2HUR3	Peptidase M20	BM28_A0130	23.8859	22.1828	23.8687	22.9589	21.9109	21.5748	6	21.7501	21.8907	21.2366	22.0305	21.9165	22.1607	6			239.25	467890000	141	1.20633	0.89947	0.0621831
360	F2HUR6	DNA gyrase subunit B (EC 5.99.1.3)	gyrB BM28_A0133	21.6239	19.7108	21.2661	21.3387	20.1089	19.6736	6	19.7793	19.5777	19.9466	19.4291	19.1359	19.6451	6	+	+	83.303	82361000	38	1.67049	1.03469	0.0213554
361	F2HUS3	S-(hydroxymethyl)glutathione dehydrogenase (EC 1.1.1.284)	BM28_A0140	24.5183	23.4666	24.9632	24.2679	23.3704	22.9831	6	21.2573	21.8878	21.273	21.4739	21.6501	22.0581	6	+	+	323.31	956920000	270	4.33922	2.32823	4.57908e-05
362	Q2YNZ5	Nitrogen-fixing NifU, C-terminal	BAB1_0139	20.4781	20.3597	21.029	20.7598	19.8025	19.7051	6	19.6123	19.2771	20.0887	19.2877	19.7428	NaN	5			127.8	83369000	46	0.895774	1.81926	0.127124
363	F2HUT9	OmpA-like transmembrane domain protein	BM28_A0710	25.0879	26.2156	24.7472	25.7473	25.5834	26.0927	6	25.5649	25.5414	25.5991	25.717	25.5103	25.795	6			323.31	2526900000	458	0.0643326	-0.0422633	0.862318
364	Q2YN67	Aminoacyl-tRNA synthetase, class I:Glutathione S-transferase, N-terminal	BAB1_0723	21.1699	20.1655	20.9418	19.4675	19.9721	19.2038	6	18.6901	18.6829	NaN	18.8492	18.5831	18.6308	5	+		115.84	43462000	17	1.47132	2.37908	0.0337817
365	F2HUX8	Lipoprotein	BM28_A0749	19.5124	19.0584	19.721	NaN	18.8172	20.1413	5	18.8104	NaN	NaN	NaN	NaN	19.0461	2			72.018	29923000	13	1.17327	3.29397	0.0671005
366	F2HUY2	Lysine-arginine-ornithine-binding periplasmic protein	BM28_A0753	27.1354	28.434	27.5272	28.2706	28.3378	28.7919	6	27.9578	28.1602	28.3109	28.0808	28.2577	27.9079	6			323.31	18898000000	1043	0.040018	-0.0297267	0.911973
367	Q2YNA8	Ribonuclease D (RNase D) (EC 3.1.13.5)	rnd BAB1_0774	19.8638	18.007	NaN	18.3609	17.2984	NaN	4	17.7758	NaN	NaN	16.8602	NaN	17.8704	3			63.609	23142000	23	0.392065	1.30228	0.405448
368	Q2YNA7	Aspartate--tRNA(Asp/Asn) ligase (EC 6.1.1.23) (Aspartyl-tRNA synthetase) (AspRS) (Non-discriminating aspartyl-tRNA synthetase) (ND-AspRS)	aspS BAB1_0775	21.5265	19.9314	22.1003	20.3787	19.5108	NaN	5	18.9681	19.0911	19.1376	19.1433	19.8331	NaN	5			84.513	97676000	41	0.318378	1.21239	0.480421
369	Q2YNA6	Uncharacterized protein	BAB1_0776	21.1928	21.1883	21.3222	20.5995	20.3616	20.4482	6	NaN	NaN	NaN	19.2361	18.9279	18.9866	3	+	+	145.38	64545000	38	2.30151	4.72203	0.00499453
370	Q2YNA2	Delta-aminolevulinic acid dehydratase (EC 4.2.1.24)	hemB BAB1_0780	19.9893	19.764	20.9018	19.4479	19.3956	19.2601	6	19.6504	19.4522	19.6071	19.6021	19.8131	20.1773	6			88.32	68136000	38	0.106734	0.0760775	0.782106
371	F2HV02	Peptidoglycan-binding domain 1 protein	BM28_A0773	20.0803	19.815	19.9861	19.1924	18.3161	18.2515	6	18.0792	18.362	17.8973	NaN	NaN	17.7227	4	+		20.195	20344000	9	1.62881	2.86003	0.0235066
372	F2HV03	Serine hydroxymethyltransferase (SHMT) (Serine methylase) (EC 2.1.2.1)	glyA BM28_A0774	22.2985	19.1605	21.9353	20.4202	20.0791	20.1089	6	19.6264	19.5197	19.3993	19.4522	19.5166	20.154	6			77.892	137140000	52	1.20119	1.05571	0.0629234
373	Q2YNC4	K(+)-insensitive pyrophosphate-energized proton pump (EC 3.6.1.1) (Membrane-bound proton-translocating pyrophosphatase) (Pyrophosphate-energized inorganic pyrophosphatase)	hppA BAB1_0793	22.6689	22.1735	23.0619	22.5369	21.5176	20.2393	6	16.9944	17.357	17.4579	NaN	NaN	17.4987	4	+	+	221.51	165340000	50	4.04698	6.07837	8.97465e-05
374	F2HV10	SmpA/OmlA domain-containing protein	BM28_A0781	21.571	21.9472	NaN	NaN	20.4394	21.4062	4	NaN	NaN	NaN	NaN	NaN	NaN	0	+	+	7.9341	68228000	23	1.97862	5.42063	0.0105046
375	Q2YPU4	Uncharacterized protein	BAB1_1419	27.8294	29.4746	28.2509	28.8856	29.4219	29.784	6	29.9873	30.1251	30.2375	30.4034	30.4435	30.0637	6	+	+	323.31	49682000000	1301	2.55662	-1.26905	0.00277576
376	Q2YPT4	FAD linked oxidase, C-terminal:FAD linked oxidase, N-terminal (EC 1.1.2.4)	BAB1_1429	21.0485	20.8348	21.4865	21.0723	20.1521	19.8288	6	19.8636	19.6259	19.6047	19.7123	NaN	20.2822	5			125.86	85121000	34	0.977336	2.02069	0.105357
377	Q2YPS8	Electron transport protein SCO1/SenC	BAB1_1435	21.0445	20.0311	20.7899	19.7876	20.0201	19.3027	6	NaN	NaN	NaN	NaN	NaN	NaN	0	+	+	96.207	34177000	15	9.84487	6.95267	1.42934e-10
378	Q2YPS7	Ribosomal protein L11 methyltransferase (L11 Mtase) (EC 2.1.1.-)	prmA BAB1_1436	20.9	NaN	NaN	19.7321	20.0909	19.4607	4	19.4471	NaN	19.1915	19.1043	19.1462	19.8341	5			14.054	40445000	32	0.11815	-0.554937	0.761817
379	Q2YPS6	Metallopeptidase family M24 (EC 3.4.11.9)	BAB1_1437	20.6303	19.1372	21.456	20.2126	19.1302	18.84	6	18.7375	18.6494	NaN	18.4542	NaN	18.6884	4	+		19.388	56197000	24	1.51948	3.07614	0.0302359
380	Q2YLZ1	Cell division protein FtsZ	ftsZ BAB1_1444	20.6715	19.7574	20.4052	20.5411	20.0363	NaN	5	19.8518	19.5241	19.5785	NaN	20.0776	19.6271	5			15.034	69847000	17	0.106958	0.458748	0.781703
381	Q2YLY8	D-alanine--D-alanine ligase (EC 6.3.2.4) (D-Ala-D-Ala ligase) (D-alanylalanine synthetase)	ddl BAB1_1447	20.903	20.0887	20.8841	20.6847	19.0741	19.2106	6	18.9854	18.3871	18.1873	18.2059	18.1778	18.1759	6	+	+	21.97	53471000	24	3.22358	1.78765	0.000597619
382	Q2YLY6	UDP-N-acetylmuramate--L-alanine ligase (EC 6.3.2.8) (UDP-N-acetylmuramoyl-L-alanine synthetase)	murC BAB1_1449	20.9934	18.9144	21.4389	NaN	18.6191	NaN	4	19.2452	19.628	18.9659	19.0059	NaN	19.4975	5			92.137	50072000	24	0.109758	-0.527775	0.776679
383	F2HV50	UDP-N-acetylglucosamine--N-acetylmuramyl-(pentapeptide) pyrophosphoryl-undecaprenol N-acetylglucosamine transferase (EC 2.4.1.227) (Undecaprenyl-PP-MurNAc-pentapeptide-UDPGlcNAc GlcNAc transferase)	murG BM28_A1444	20.5333	NaN	20.898	20.6932	NaN	NaN	3	NaN	NaN	20.0421	NaN	NaN	19.8734	2			60.881	58366000	21	0.291774	1.49984	0.510771
384	Q2YM67	UDP-N-acetylmuramoyl-tripeptide--D-alanyl-D-alanine ligase (EC 6.3.2.10)	BAB1_1454	21.369	19.1427	22.2561	19.9714	19.4473	NaN	5	18.6287	18.744	NaN	NaN	NaN	NaN	2	+		114.6	70215000	19	1.43972	4.19729	0.036331
385	F2HV55	UDP-N-acetylmuramoyl-L-alanyl-D-glutamate--2,6-diaminopimelate ligase (EC 6.3.2.13) (Meso-A2pm-adding enzyme) (Meso-diaminopimelate-adding enzyme) (UDP-MurNAc-L-Ala-D-Glu:meso-diaminopimelate ligase) (UDP-MurNAc-tripeptide synthetase) (UDP-N-acetylmuramyl-tripeptide synthetase)	murE BM28_A1449	21.2458	19.459	21.205	20.4627	19.5648	NaN	5	18.3846	18.6725	18.8613	18.8506	NaN	18.8505	5			56.049	61129000	30	0.409009	1.38631	0.389934
386	Q2YM41	Putative peptidoglycan binding domain 1:N-acetylmuramoyl-L-alanine amidase, family 2 (EC 3.5.1.28)	BAB1_1462	18.7651	20.1803	19.265	19.5899	19.7495	20.0774	6	19.7259	18.9603	18.9589	18.8448	19.1792	19.6718	6			14.746	44656000	24	0.736137	0.381061	0.183596
387	F2HV64	Uncharacterized protein	BM28_A1458	18.5698	20.2049	NaN	19.3453	19.5	19.4148	5	NaN	NaN	NaN	NaN	NaN	NaN	0	+	+	10.036	13915000	13	3.20398	5.16414	0.000625198
388	F2HV74	Putative ABC transporter ATP-binding protein	BM28_A1468	21.9075	19.9027	21.9032	20.7233	20.224	19.5963	6	19.6832	20.2756	19.5767	19.8577	19.8624	19.8128	6			65.862	117010000	58	1.18013	0.864765	0.0660493
389	Q2YS20	Choloylglycine hydrolase (EC 3.5.1.24)	BAB1_1488	25.4427	24.6056	25.6744	25.1298	24.2479	24.0418	6	24.2389	24.1911	23.6708	24.0217	24.066	24.5018	6	+		323.31	1757500000	350	1.53079	0.741956	0.0294585
390	F2HV86	Uncharacterized protein	BM28_A1480	20.9057	21.8277	20.6437	21.2652	21.4485	21.7412	6	21.1129	NaN	20.7289	20.5801	20.7563	20.456	5			206.33	97703000	48	0.744739	1.8313	0.179995
391	F2HV91	Periplasmic immunogenic protein	BM28_A1485	25.3653	25.2066	24.6951	25.355	25.6652	25.7004	6	25.4014	24.9544	24.8999	25.2381	25.1108	25.3352	6			323.31	1702300000	328	0.479925	0.174633	0.331189
392	Q2YS13	Antifreeze protein, type I	BAB1_1495	20.6932	19.8338	NaN	20.9224	21.5871	21.2083	5	22.0434	24.2688	24.9422	25.3775	24.0618	24.3915	6	+	+	6.9677	487810000	35	2.12594	-4.60506	0.00748271
393	Q2YM27	Uncharacterized protein	BAB1_1497	20.571	21.3291	21.0612	21.1316	21.3407	21.146	6	21.4024	20.4983	20.9899	20.5732	20.7813	21.0494	6			41.697	136870000	63	0.58776	0.214159	0.258369
394	Q2YP10	Phosphoenolpyruvate-dependent sugar phosphotransferase system, EIIA 2:PTS IIA-like nitrogen-regulatory protein PtsN (EC 2.7.1.69)	BAB1_0160	23.096	22.2742	23.125	22.4498	22.0155	20.2197	6	21.1561	20.6556	20.9538	20.2844	20.4723	19.7031	6	+	+	108.93	191380000	52	2.1918	1.65913	0.00642991
395	F2HVE0	Uncharacterized protein	BM28_A0200	20.8616	20.6293	19.6664	21.1481	21.4056	22.1158	6	20.7043	22.778	22.1902	22.547	21.9984	NaN	5			58.668	154080000	54	0.0967962	0.399832	0.80021
396	Q2YP48	Aminotransferase class-III:Maltose binding protein	BAB1_0191	23.6211	23.5309	24.0738	23.2103	23.0356	23.3847	6	23.9279	24.1851	23.5847	23.8565	23.6166	23.6987	6			323.31	790990000	271	1.08016	-0.335534	0.0831467
397	F2HVF2	EPTC-inducible aldehyde dehydrogenase	BM28_A0212	26.0025	24.4636	26.9474	26.1265	24.4259	23.9422	6	NaN	NaN	NaN	NaN	NaN	NaN	0	+	+	323.31	1615400000	158	9.57213	12.108	2.67836e-10
398	Q2YP66	Zinc-containing alcohol dehydrogenase superfamily:Zinc-containing alcohol dehydrogenase (EC 1.1.1.1)	BAB1_0204	27.5968	28.7903	27.9065	28.376	29.0366	29.399	6	27.1095	27.2028	27.3342	27.0834	27.4668	27.1272	6	+	+	323.31	12537000000	617	2.95169	1.2969	0.00111766
399	Q2YP60	ABC transporter substrate-binding protein KO: K02051 sulfonate/nitrate transport system substrate-binding protein	BAB1_0214	18.0869	18.4831	17.8543	19.0894	18.4967	18.9206	6	17.3199	NaN	NaN	NaN	NaN	17.5647	2	+	+	7.8468	9813900	9	2.76179	3.86772	0.00173066
400	F2HVH1	Heavy metal translocating P-type ATPase	BM28_A0231	20.7145	NaN	21.4262	20.823	19.628	NaN	4	NaN	NaN	NaN	NaN	NaN	NaN	0	+	+	50.469	42512000	19	1.96867	4.95862	0.010748
401	Q2YNB7	Bacterial regulatory protein, MerR family	BAB1_0800	20.5406	19.7632	21.6433	21.1042	19.5391	20.0812	6	18.7602	19.3928	18.7037	19.5716	19.2567	19.1546	6	+	+	110.95	68205000	27	2.33042	1.30532	0.0046728
402	Q2YNE1	N-acetyl-gamma-glutamyl-phosphate reductase (AGPR) (EC 1.2.1.38) (N-acetyl-glutamate semialdehyde dehydrogenase) (NAGSA dehydrogenase)	argC BAB1_0808	20.515	19.6867	19.8731	19.9608	19.7916	19.2613	6	19.1878	18.9494	19.5239	19.0533	19.3509	19.6332	6	+	+	18.199	49331000	23	1.75344	0.565004	0.0176423
403	F2HVI7	30S ribosomal protein S9	rpsI BM28_A0800	22.4178	23.1882	22.0441	23.2321	23.2907	23.0934	6	NaN	NaN	NaN	NaN	NaN	NaN	0	+	+	61.918	274600000	45	12.2127	9.66772	6.12843e-13
404	F2HVI8	50S ribosomal protein L13	rplM BM28_A0801	17.3811	17.4834	18.5795	17.8066	NaN	NaN	4	NaN	NaN	NaN	NaN	NaN	NaN	0	+	+	10.321	4521400	3	1.95917	3.06842	0.0109858
405	Q2YND6	Cys/Met metabolism pyridoxal-phosphate-dependent enzymes:O-acetylhomoserine/O-acetylserine sulfhydrylase (EC 2.5.1.49)	BAB1_0813	19.0263	NaN	18.5156	18.7728	NaN	NaN	3	18.9106	18.6596	NaN	18.7234	NaN	19.0046	4			43.141	36378000	11	0.230676	-0.96224	0.587928
406	Q2YNC8	NADH-quinone oxidoreductase subunit B (EC 1.6.5.11) (NADH dehydrogenase I subunit B) (NDH-1 subunit B)	nuoB BAB1_0823	18.7208	18.3765	18.5557	18.7181	18.0316	18.0704	6	18.7341	NaN	NaN	18.5156	NaN	NaN	2	+	+	49.973	21069000	20	1.84298	3.39723	0.0143555
407	Q2YNC7	NADH-quinone oxidoreductase subunit C (EC 1.6.5.11) (NADH dehydrogenase I subunit C) (NDH-1 subunit C)	nuoC BAB1_0824	19.6345	19.8126	19.8001	19.7982	19.5473	19.5383	6	21.6281	21.5892	20.6402	21.1679	21.5664	21.7019	6	+	+	85.565	98080000	42	5.66356	-1.69376	2.16992e-06
408	Q2YNF9	NADH dehydrogenase (Ubiquinone), 24 kDa subunit (EC 1.6.5.3)	nuoE BAB1_0826	20.8698	20.6483	21.0154	20.6799	20.4638	20.4036	6	21.8543	21.226	21.6126	21.1011	21.726	21.8624	6	+	+	82.108	119170000	83	3.52112	-0.883595	0.000301215
409	Q2YNF7	Respiratory-chain NADH dehydrogenase 75 kDa subunit:Ferredoxin:Molybdopterin oxidoreductase (EC 1.6.5.3)	nuoG BAB1_0828	22.0666	20.8288	22.4979	21.8435	20.8221	20.8815	6	21.8832	21.7329	21.5212	21.8771	22.1334	22.1058	6			76.169	238410000	77	0.601711	-0.385531	0.250201
410	Q2YNE7	Glyoxalase/Bleomycin resistance protein/dioxygenase domain (EC 4.4.1.5)	BAB1_0838	NaN	19.6452	20.5261	NaN	NaN	NaN	2	19.9372	20.1278	19.7979	NaN	19.5872	NaN	4			7.1392	31884000	10	0.503085	-2.14312	0.313989
411	F2HVM0	Proline--tRNA ligase (EC 6.1.1.15) (Prolyl-tRNA synthetase)	proS BM28_A0833	21.0602	NaN	20.5723	20.5649	20.8536	NaN	4	20.8657	21.1092	21.0653	20.807	20.851	21.1177	6			70.545	109820000	45	0.926381	-2.72417	0.118473
412	Q2YNH4	Uncharacterized protein	BAB1_0846	21.8821	23.5824	21.6248	22.2855	23.6057	23.8673	6	22.6539	21.9481	22.5756	22.0132	22.4932	22.0881	6			72.929	315410000	106	0.595428	0.512604	0.253847
413	Q2YNH3	Uncharacterized protein	BAB1_0847	19.614	19.1921	20.3844	19.1656	19.2145	19.2783	6	19.9576	19.8055	19.6569	19.4798	20.395	20.551	6			57.985	48104000	35	1.08292	-0.499497	0.0826191
414	F2HVN1	Glutaredoxin	BM28_A0844	24.6372	24.4633	25.0972	23.6539	24.0491	23.6375	6	21.82	20.7608	21.3342	21.0639	20.8884	21.3445	6	+	+	323.31	742960000	120	6.09359	3.05443	8.06146e-07
415	Q2YNG6	Phosphoribosylformylglycinamidine synthase subunit PurL (FGAM synthase) (EC 6.3.5.3) (Formylglycinamide ribonucleotide amidotransferase subunit II) (FGAR amidotransferase II) (FGAR-AT II) (Glutamine amidotransferase PurL) (Phosphoribosylformylglycinamidine synthase subunit II)	purL BAB1_0857	20.5486	20.4254	20.8352	20.3787	19.938	NaN	5	20.6081	NaN	20.3994	20.0726	NaN	20.2283	4			181.16	80704000	23	0.279348	1.26792	0.525596
416	Q2YNG2	Phosphoribosylformylglycinamidine synthase subunit PurS (FGAM synthase) (EC 6.3.5.3) (Formylglycinamide ribonucleotide amidotransferase subunit III) (Phosphoribosylformylglycinamidine synthase subunit III)	purS BAB1_0861	21.8051	NaN	21.3821	NaN	22.1633	22.507	4	22.5628	NaN	NaN	NaN	22.3585	22.2389	3			165.56	213670000	48	0.179587	1.24789	0.661321
417	F2HVN9	Putative cytoplasmic protein	BM28_A0852	24.1164	25.0529	23.6965	24.6002	25.4659	25.5504	6	25.1448	24.4731	25.4108	25.265	25.7522	25.4571	6			323.31	1822000000	366	0.737556	-0.503443	0.182997
418	Q2YNI5	Beta-ketoacyl synthase:ATP/GTP-binding site motif A (P-loop) (EC 2.3.1.41)	BAB1_0872	21.3518	20.0406	21.5433	22.4736	20.8496	20.5901	6	19.4911	20.2141	19.7895	19.7418	19.7453	19.7762	6	+	+	35.672	88125000	52	2.43049	1.34851	0.00371117
419	Q2YNI4	Beta-ketoacyl synthase	BAB1_0873	22.82	20.4683	22.6701	21.5063	20.7213	18.8805	6	19.8738	19.3221	19.6249	19.7272	20.0774	20.6768	6			183.68	136470000	59	1.16195	1.29405	0.0688726
420	Q2YNI3	Acyl carrier protein (ACP):Phosphopantetheine attachment site:Phosphopantetheine-binding domain	BAB1_0874	23.4919	24.0333	NaN	23.6111	23.7701	23.7868	5	24.7872	23.2004	24.15	24.0078	23.8358	23.8311	6			34.882	676480000	65	0.540518	-1.98485	0.28806
421	F2HVQ0	Uncharacterized protein	BM28_A0863	21.1675	19.9916	22.1173	20.2067	20.121	19.9769	6	NaN	NaN	NaN	NaN	NaN	NaN	0	+	+	116.72	50978000	23	8.84453	7.38682	1.43043e-09
422	Q2YM26	RNA polymerase sigma factor RpoD (Sigma-70)	rpoD BAB1_1498	20.5441	18.715	20.7072	19.3555	18.8879	NaN	5	18.725	18.6117	18.749	18.4456	NaN	NaN	4			22.797	37133000	16	0.519595	1.74473	0.302277
423	Q2YM23	GatB/Yqey	BAB1_1501	20.3816	21.3943	20.2004	21.1486	20.3263	20.0277	6	20.2296	19.7976	20.1426	19.3488	19.8234	19.9028	6	+	+	40.105	74363000	29	1.66448	0.705665	0.0216533
424	Q2YRM6	1-aminocyclopropane-1-carboxylate synthase:Aminotransferase, class-I:Aminotransferase, class I and II (EC 2.6.1.1)	aspC BAB1_1514	24.5581	23.4442	24.4679	24.1661	23.6374	22.9792	6	23.4798	23.3958	23.3391	23.4193	23.5566	23.3766	6			275.64	926970000	211	0.951072	0.44761	0.111925
425	Q2YRP4	Bacterial regulatory protein LysR, HTH motif:LysR substrate binding domain	BAB1_1517	19.8491	18.7052	20.9265	19.3837	19.0751	NaN	5	NaN	19.0403	19.0202	18.5739	18.4701	18.5681	5			11.676	39738000	11	0.198558	0.711163	0.633056
426	Q2YRP0	Bacterial regulatory proteins, AsnC family	lrp-1 BAB1_1521	22.8345	22.9323	23.3209	23.0958	22.8937	22.7199	6	21.9156	22.0593	21.8549	21.9571	21.6998	22.0426	6	+	+	77.854	367690000	108	5.87202	1.04463	1.34272e-06
427	Q2YRN7	Uncharacterized protein	BAB1_1524	20.6868	21.7512	21.0893	20.6525	21.049	21.7862	6	22.4667	22.176	21.9983	22.1306	22.2043	22.4816	6	+	+	136.7	162700000	82	3.2224	-1.07375	0.000599234
428	Q2YRN3	Thioesterase superfamily	BAB1_1528	25.7604	25.733	24.4149	25.1412	26.0577	25.9192	6	24.9078	24.9843	25.1545	25.8132	25.075	25.8073	6			323.31	1993900000	316	0.304088	0.214057	0.496492
429	F2HVT5	Beta-lactamase domain-containing protein	BM28_A1523	23.4068	25.3215	23.2012	24.3504	24.6491	24.5696	6	23.6277	23.1017	23.562	23.2918	24.1344	23.3815	6			172.28	626970000	118	1.16498	0.733258	0.0683941
430	Q2YRL4	Response regulator receiver:Transcriptional regulatory protein, C terminal	BAB1_1538	20.8761	20.0055	21.0045	19.587	19.8719	19.6122	6	18.9942	19.5284	19.4634	19.0196	NaN	19.2376	5			323.31	54406000	25	1.01923	1.91734	0.0956682
431	Q2YLY4	Uncharacterized protein	BAB1_1543	20.7867	20.6976	21.2358	20.9444	20.8538	20.78	6	23.1709	23.6489	23.1079	23.2238	22.9513	23.0317	6	+	+	48.348	299890000	58	8.25749	-2.30602	5.52731e-09
432	Q2YLY0	Metallopeptidase family M24 (EC 3.4.13.9)	BAB1_1547	20.7783	18.1931	21.0716	18.9835	18.4729	NaN	5	17.9315	18.0216	18.2211	18.2998	18.301	18.1936	6			57.831	34850000	19	0.0930129	0.290133	0.807211
433	Q2YLX9	Lipoprotein, putative	BAB1_1548	18.9067	19.6369	19.1488	19.0753	19.0567	NaN	5	19.4694	19.7521	19.207	18.6735	19.0413	19.037	6			22.097	25141000	14	0.476074	-1.0243	0.334138
434	Q2YLX8	Ribose-phosphate pyrophosphokinase (RPPK) (EC 2.7.6.1) (5-phospho-D-ribosyl alpha-1-diphosphate) (Phosphoribosyl diphosphate synthase) (Phosphoribosyl pyrophosphate synthase)	prs BAB1_1549	21.8382	19.4216	20.8895	20.3154	19.4354	NaN	5	19.2307	19.9032	19.1982	NaN	NaN	19.2317	4			206.4	75822000	44	0.481691	1.85439	0.329845
435	Q2YLX6	50S ribosomal protein L25 (General stress protein CTC)	rplY ctc BAB1_1551	25.2167	25.9042	24.0206	25.3186	25.7312	25.9687	6	26.5096	26.3676	26.2723	26.1581	26.1098	25.9709	6	+	+	323.31	3416700000	434	1.76255	-0.871392	0.0172764
436	F2HVW1	Cytochrome c1	petC BM28_A1549	21.1463	20.8939	21.2484	21.3847	20.9455	20.477	6	21.1489	21.2228	20.5089	20.6547	20.8883	20.8626	6			217.73	148550000	83	0.343961	0.134948	0.452938
437	Q2YM55	Cytochrome b	petB BAB1_1558	19.2912	18.9259	21.3548	19.4773	NaN	NaN	4	NaN	18.3031	18.4013	18.1838	18.2649	18.5027	5			33.027	48873000	9	0.0209522	0.100552	0.952901
438	Q2YM54	Ubiquinol-cytochrome c reductase iron-sulfur subunit (EC 1.10.2.2)	BAB1_1559	21.7265	22.7967	21.7162	22.3462	22.7292	22.3798	6	23.0142	22.6109	23.1572	22.8214	23.2439	23.0795	6	+	+	133.16	501620000	106	2.0877	-0.705413	0.00817145
439	Q2YM50	Purine nucleoside permease	BAB1_1563	21.9929	20.8355	21.849	21.2753	20.4078	20.5082	6	NaN	NaN	NaN	NaN	NaN	NaN	0	+	+	52.396	73302000	22	10.2275	7.9348	5.92197e-11
440	Q2YS10	Oxygen-dependent coproporphyrinogen-III oxidase (CPO) (Coprogen oxidase) (Coproporphyrinogenase) (EC 1.3.3.3)	hemF BAB1_1566	20.1357	18.4221	20.5804	19.5287	18.0721	NaN	5	18.843	18.8145	18.4185	18.6489	18.5994	18.6404	6			35.609	41265000	29	0.115815	-0.335937	0.765923
441	F2HVY7	Extracellular solute-binding protein	BM28_A0870	18.4726	NaN	NaN	18.64	NaN	19.7363	3	19.3861	20.7974	20.4833	20.2091	20.041	19.494	6	+	+	89.827	28986000	15	1.89934	-3.98865	0.0126083
442	Q2YNK7	Nicotinate-nucleotide--dimethylbenzimidazole phosphoribosyltransferase (NN:DBI PRT) (EC 2.4.2.21) (N(1)-alpha-phosphoribosyltransferase)	cobT BAB1_0886	19.0746	NaN	19.0192	18.4288	NaN	NaN	3	19.483	NaN	19.1191	19.3641	NaN	NaN	3			40.363	35376000	14	0.045896	-0.240582	0.899713
443	Q2YNK2	Uncharacterized protein	BAB1_0893	20.9186	21.4424	21.2261	20.8976	21.0992	20.7891	6	20.5363	19.8057	21.1768	20.3558	21.086	20.9274	6			18.617	89396000	31	0.966427	0.41415	0.108037
444	F2HW02	Oleosin-B6	BM28_A0885	20.4141	20.2905	20.5059	19.9279	20.3174	19.9135	6	20.3511	20.2428	20.6161	19.7812	20.1845	20.4503	6			77.144	62260000	51	0.103548	-0.0427783	0.787865
445	Q2YNJ7	Beta-N-acetylhexosaminidase (EC 3.2.1.52)	BAB1_0898	20.0739	NaN	19.6415	20.2613	19.7937	19.337	5	NaN	19.1654	NaN	NaN	NaN	NaN	1	+	+	12.101	41161000	15	1.89975	4.51701	0.0125965
446	F2HW06	Sec-independent protein translocase protein TatA	tatA BM28_A0889	21.3027	23.5715	21.6847	22.0602	22.5103	22.6737	6	20.8095	20.9193	21.4816	20.814	21.1531	21.0526	6	+	+	33.355	170980000	48	2.36124	1.26217	0.00435273
447	F2HW09	Serine--tRNA ligase (EC 6.1.1.11) (Seryl-tRNA synthetase) (Seryl-tRNA(Ser/Sec) synthetase)	serS BM28_A0892	21.8051	22.9761	22.1463	23.0879	23.1813	22.6734	6	NaN	NaN	NaN	NaN	NaN	NaN	0	+	+	48.876	177940000	42	11.8042	9.435	1.56963e-12
448	Q2YNM5	5'-nucleotidase SurE (EC 3.1.3.5) (Nucleoside 5'-monophosphate phosphohydrolase)	surE BAB1_0905	20.4846	20.6123	20.4982	20.1024	20.2653	19.8329	6	NaN	NaN	NaN	NaN	NaN	NaN	0	+	+	57.953	47324000	30	13.3418	7.08931	4.55191e-14
449	Q2YNM1	Immunogenic membrane protein YajC	yajC BAB1_0909	21.8805	22.0745	22.2191	21.3158	21.4929	21.8309	6	20.9288	21.1022	20.7888	20.6549	20.4791	20.4138	6	+	+	32.611	159830000	48	3.92436	1.07435	0.000119027
450	Q2YNL6	Uncharacterized protein	BAB1_0914	20.168	20.3488	18.3383	19.6267	20.2421	18.7431	6	NaN	18.4908	NaN	19.5407	NaN	18.8513	3	+		30.9	20096000	18	1.5828	3.49237	0.0261338
451	Q2YNL3	Trigger factor (TF) (EC 5.2.1.8) (PPIase)	tig BAB1_0917	23.5413	22.8723	23.4595	23.3106	22.8606	22.5086	6	22.7345	22.6143	23.1463	22.5837	22.8052	22.7123	6			323.31	650640000	205	0.96099	0.326115	0.109398
452	Q2YNL2	Aspartyl/glutamyl-tRNA(Asn/Gln) amidotransferase subunit B (Asp/Glu-ADT subunit B) (EC 6.3.5.-)	gatB BAB1_0918	22.6047	22.7409	22.6436	22.6378	22.3652	21.9604	6	21.4459	21.1902	21.3182	21.1562	21.1417	21.6358	6	+	+	316.25	271000000	142	5.05483	1.17744	8.8139e-06
453	Q2YNP7	NADH:ubiquinone oxidoreductase 17.2 kD subunit	BAB1_0920	18.0442	18.2656	18.3836	NaN	NaN	NaN	3	18.4529	18.6855	18.0273	17.8814	18.0907	18.2709	6			9.6788	11884000	8	1.29849	-2.51424	0.0502938
454	Q2YNP2	Biotin/lipoyl attachment:Acetyl-CoA biotin carboxyl carrier:Biotin-requiring enzyme, attachment site	accB BAB1_0925	24.0727	23.8164	23.6143	23.6836	23.409	22.8181	6	23.3102	22.0789	23.4223	22.8501	22.6487	22.4237	6	+	+	78.101	591240000	77	1.76032	0.780011	0.017365
455	F2HW41	Ribonuclease E (RNase E) (EC 3.1.26.12)	rne BM28_A0924	18.6849	17.4499	19.0935	17.7962	NaN	NaN	4	NaN	17.4338	17.1273	16.96	16.825	17.5471	5			2.6866	18332000	6	0.0152763	0.0568976	0.965436
456	Q2YNR0	Tyrosine--tRNA ligase (EC 6.1.1.1) (Tyrosyl-tRNA synthetase) (TyrRS)	tyrS BAB1_0943	19.7903	18.9429	20.3069	20.637	18.9042	18.9298	6	19.3772	18.9373	18.8861	18.7656	NaN	19.3352	5			61.499	47774000	28	0.754834	1.49992	0.175859
457	F2HW76	Choline ABC transporter periplasmic binding protein	choX BM28_A1585	21.434	21.8709	21.5844	21.6511	21.2835	21.2293	6	NaN	NaN	NaN	NaN	NaN	NaN	0	+	+	10.659	61323000	13	14.8754	8.29886	1.33227e-15
458	Q2YRB9	DegT/DnrJ/EryC1/StrS aminotransferase	BAB1_1616	21.9733	21.4753	22.3217	20.831	20.8341	20.0678	6	21.6488	20.7383	20.8657	20.6035	21.1496	21.122	6			165.06	258950000	98	0.25777	0.229186	0.55237
459	Q2YRB8	Oxidoreductase, N-terminal:Oxidoreductase, C-terminal	BAB1_1617	20.4298	18.9413	20.5301	19.9045	18.7149	18.2973	6	18.0106	18.3383	18.0181	18.0989	18.0996	18.566	6	+	+	136.4	46280000	27	2.04957	1.2811	0.00892126
460	Q2YQ99	Uncharacterized protein	BAB1_1632	19.3763	19.811	19.0885	19.8611	19.5393	19.8302	6	19.8988	20.2646	20.0799	20.5416	20.3201	20.61	6	+	+	63.88	47593000	30	2.7255	-0.701426	0.00188149
461	F2HWB4	7-alpha-hydroxysteroid dehydrogenase	BM28_A1623	21.3798	18.874	21.0036	18.8941	18.7448	19.581	6	NaN	NaN	NaN	18.1709	18.4119	19.2254	3	+	+	100.69	46902000	33	1.8339	3.83984	0.0146589
462	Q2YQC0	Uncharacterized protein	BAB1_1641	25.7445	27.4238	25.3486	26.3255	26.8646	27.3827	6	25.522	25.1611	25.6409	25.1365	25.8196	25.674	6	+	+	189.91	3771100000	216	1.70317	1.02262	0.0198073
463	F2HWC2	Dihydroxyacetone kinase subunit L	BM28_A1631	NaN	NaN	18.9443	NaN	NaN	NaN	1	22.4126	22.3895	22.5998	21.6687	22.1664	22.3705	6	+	+	223.93	114940000	51	5.11456	-8.10221	7.6814e-06
464	F2HWC3	Dihydroxyacetone kinase	BM28_A1632	19.012	NaN	19.5427	19.0749	NaN	NaN	3	22.281	22.4771	22.2388	22.4769	22.3902	22.5273	6	+	+	304.92	226420000	76	3.01055	-6.18862	0.00097599
465	Q2YRI6	Uncharacterized protein	BAB1_1652	20.613	21.7602	20.9811	21.1971	21.8196	22.1264	6	22.3003	21.439	22.0575	21.9597	21.9834	21.3377	6			263.07	143320000	57	0.802986	-0.430037	0.157403
466	Q2YRI3	Aldehyde dehydrogenase (EC 1.2.1.16)	gabD BAB1_1655	20.5844	19.5727	20.4467	19.7206	19.4774	NaN	5	NaN	19.4194	19.6086	19.5706	19.4792	19.5234	5			23.156	46699000	23	0.0872795	0.366761	0.817938
467	F2HWE0	Malate synthase G (EC 2.3.3.9)	glcB BM28_A1649	20.1001	NaN	21.5634	NaN	18.918	NaN	3	NaN	18.3609	NaN	NaN	18.2397	18.5657	3			8.0667	34252000	13	0.18219	0.902527	0.65737
468	Q2YRK3	RNA polymerase sigma factor RpoH (RNA polymerase sigma-32 factor)	rpoH BAB1_1665	20.3441	19.5155	20.8473	20.5213	19.1175	NaN	5	19.9166	19.506	19.1002	18.8348	19.2267	19.3785	6			18.963	53481000	21	0.129857	-0.401171	0.741555
469	Q2YRH9	Response regulator receiver	BAB1_1671	23.9033	23.2921	24.0518	23.4414	22.4955	21.5125	6	20.8719	21.2926	20.4893	20.6682	20.9685	20.8036	6	+	+	52.191	446020000	59	3.62642	2.26709	0.000236362
470	F2HWF0	RNA polymerase sigma factor	BM28_A1659	20.862	19.6197	21.6357	20.1323	19.8691	19.4733	6	NaN	NaN	NaN	NaN	NaN	NaN	0	+	+	61.038	52244000	13	8.83434	7.05534	1.46439e-09
471	Q2YRH5	DNA gyrase, subunit B	BAB1_1675	18.4413	21.878	20.4203	19.896	19.86	19.9029	6	18.9029	20.1179	20.1244	19.1718	19.2405	18.9474	6			31.754	46156000	32	0.639136	0.648921	0.229543
472	Q2YRG4	Deoxyuridine 5'-triphosphate nucleotidohydrolase (dUTPase) (EC 3.6.1.23) (dUTP pyrophosphatase)	dut BAB1_1687	24.3392	25.3651	23.9057	24.8429	25.4291	25.6918	6	24.7491	24.9965	25.6843	25.8026	25.544	25.0338	6			271.37	1772600000	257	0.536424	-0.372756	0.290787
473	F2HWH5	Uncharacterized protein	BM28_A1684	21.5131	21.0421	21.9169	21.3641	20.9272	20.9164	6	20.8956	21.1982	20.0877	20.8456	20.5126	21.5629	6			89.256	138180000	60	0.866098	0.429536	0.136114
474	Q2YQI5	Adenylosuccinate synthetase (AMPSase) (AdSS) (EC 6.3.4.4) (IMP--aspartate ligase)	purA BAB1_1695	25.2437	26.4728	25.7877	25.7212	26.1526	25.9385	6	26.1159	25.7124	25.805	25.9296	25.9448	25.7392	6			323.31	4209000000	693	0.0222403	0.0116215	0.950079
475	Q2YQI1	Phosphoserine transaminase (EC 2.6.1.52)	serC BAB1_1699	21.5641	20.6373	21.5792	20.6441	19.9386	19.9931	6	21.269	22.1233	21.755	21.6469	21.2292	21.3341	6	+		64.529	140630000	79	1.53823	-0.833498	0.0289582
476	F2HWI5	ATP-dependent zinc metalloprotease FtsH (EC 3.4.24.-)	ftsH BM28_A1694	20.7808	NaN	20.7554	18.2115	17.7834	NaN	4	NaN	NaN	NaN	NaN	NaN	NaN	0	+	+	6.2276	23054000	6	1.83396	4.11519	0.0146567
477	Q2YQH5	TPR repeat:Molluscan rhodopsin C-terminal tail	BAB1_1705	NaN	19.3092	18.4691	NaN	19.1505	19.1605	4	19.8497	19.445	20.2442	19.3966	19.7736	19.876	6			32.497	34308000	21	1.25447	-2.6793	0.0556585
478	Q2YQH3	MotY protein:Bacterial outer membrane protein:OmpA/MotB domain	BAB1_1707	19.902	21.5261	18.9692	21.682	20.7653	22.3632	6	20.5172	20.3547	20.9435	20.4666	20.8	20.8506	6			143.96	141600000	67	0.159661	0.212524	0.692371
479	Q2YRD7	Protein TolB	tolB BAB1_1709	22.51	22.379	22.36	21.7666	22.1158	21.8112	6	23.066	23.1913	22.5345	22.8812	22.7006	23.035	6	+	+	323.31	338670000	175	2.99391	-0.744346	0.00101412
480	Q2YRD6	Proline-rich region:Proline-rich extensin:Histamine H3 receptor	tolA BAB1_1710	18.8147	19.7408	19.29	18.4132	20.1163	20.3525	6	20.7103	19.587	20.3726	20.739	20.8415	NaN	5			19.715	55792000	38	0.0603917	0.211179	0.870178
481	Q2YRD3	Uncharacterized protein	BAB1_1713	20.1246	21.4713	19.5205	19.8531	21.2882	20.1544	6	20.6021	19.3008	20.6011	19.9591	20.6132	20.0297	6			9.9838	57355000	29	0.230775	0.217678	0.587794
482	F2HWK0	Thiamine-phosphate pyrophosphorylase	BM28_A1709	21.518	22.2629	21.7523	21.3836	21.6326	21.1647	6	22.2929	22.2627	21.4336	21.8093	22.2008	NaN	5			255.34	203590000	47	0.318367	1.08414	0.480434
483	Q2YRC3	Inositol phosphatase/fructose-1,6-bisphosphatase:Inositol monophosphatase (EC 3.1.3.25)	BAB1_1723	20.296	19.5391	19.8239	18.736	18.7019	19.3678	6	19.4477	19.5049	NaN	18.9629	19.5596	19.1974	5			18.815	39570000	8	0.490487	1.09702	0.323231
484	Q2YRF3	50S ribosomal protein L31	rpmE BAB1_1728	22.5373	23.8405	22.2666	23.5475	23.6073	23.1785	6	23.7033	23.6593	23.4409	23.6319	23.8484	23.5083	6			133.79	739880000	145	0.970962	-0.469092	0.106915
485	Q2YRF2	Probable transcriptional regulatory protein BAB1_1729	BAB1_1729	19.2883	19.2515	19.5426	19.8636	NaN	18.9261	5	18.5573	18.8237	19.4472	18.8136	18.7868	NaN	5			22.073	38747000	29	0.108877	0.407242	0.778257
486	Q2YIF5	Inositol phosphatase/fructose-1,6-bisphosphatase:Inositol monophosphatase	BAB2_0044	19.9594	19.5222	20.9502	20.176	NaN	NaN	4	19.5205	NaN	19.1804	19.1896	19.1944	19.7609	5			36.334	49957000	16	0.105171	-0.504658	0.784926
487	Q2YIE9	Heat shock protein Hsp20	BAB2_0050	20.3256	21.1966	20.4154	21.4241	21.0179	20.7251	6	20.281	20.1972	20.4915	20.7108	20.5006	20.384	6			82.274	86066000	89	1.27109	0.423291	0.0535687
488	Q2YJ80	L-threonine aldolase (EC 4.1.2.48)	BAB2_0051	18.573	18.8747	18.9631	19.1718	18.6445	19.0905	6	21.361	21.7394	21.1929	20.2206	21.0192	20.027	6	+	+	49.672	57505000	23	4.44919	-2.04041	3.55476e-05
489	Q2YJ79	Type IV secretion system protein virB9	virB9 BAB2_0060	22.101	21.3173	19.7642	20.6878	21.212	20.9488	6	21.1418	20.4141	20.9282	21.2861	20.9405	21.3023	6			43.555	69743000	34	0.00300614	0.00304063	0.993102
490	Q2YJ78	Type IV secretion system protein virB8	virB8 BAB2_0061	23.8015	23.2052	22.5388	22.2292	22.6326	21.9781	6	21.9976	21.4878	21.1757	21.4294	20.7019	21.5402	6	+	+	130.11	180660000	40	2.69383	1.34212	0.00202382
491	Q2YIT3	UTP--glucose-1-phosphate uridylyltransferase (EC 2.7.7.9) (UDP-glucose pyrophosphorylase)	galU BAB2_0070	21.6572	21.0305	21.9589	20.8273	20.4086	20.1549	6	20.2901	20.3222	20.614	20.4423	20.0833	20.7282	6			74.341	134390000	50	1.1124	0.592896	0.0771967
492	F2HWP3	Band 7 protein	BM28_B0077	22.7116	22.0763	21.2887	22.2227	21.3751	21.0361	6	18.9578	19.0025	18.7524	18.5886	18.646	19.4932	6	+	+	98.063	106660000	54	5.66487	2.87831	2.16337e-06
493	Q2YIS9	Ferrochelatase (EC 4.99.1.1) (Heme synthase) (Protoheme ferro-lyase)	hemH BAB2_0075	21.119	19.4657	22.5064	21.0407	20.0118	NaN	5	18.7677	18.9265	NaN	NaN	NaN	18.5815	3			29.448	83458000	20	1.10343	3.57468	0.0788073
494	Q2YIP8	Lipoprotein Omp10	omp10 BAB2_0076	19.456	22.6024	20.3177	20.8141	21.6005	21.7106	6	23.4663	21.8442	23.1841	22.548	22.681	23.2561	6	+	+	111.01	320440000	58	2.14681	-1.74641	0.00713158
495	F2HWP6	Homospermidine synthase	BM28_B0080	NaN	NaN	NaN	NaN	NaN	NaN	0	NaN	19.0844	19.6525	NaN	NaN	20.1664	3			98.653	29266000	17	1.29913	-3.21223	0.0502189
496	F2HWQ0	Oligoendopeptidase, pepF/M3 family protein	BM28_B0084	22.4611	21.3167	22.2094	21.2687	20.6231	20.1974	6	20.2861	20.4219	19.8676	20.1952	20.2587	20.7326	6	+	+	50.221	132410000	33	1.72561	1.05239	0.0188101
497	F2HWQ3	Keto-hydroxyglutarate-aldolase/keto-deoxy-phosphogluconate aldolase	BM28_B0087	18.8925	19.5844	19.8328	19.3762	19.0293	18.8823	6	NaN	NaN	NaN	NaN	NaN	NaN	0	+	+	29.966	21456000	13	11.3769	6.05624	4.1982e-12
498	F2HWR5	Amidase	BM28_B0099	19.3798	19.7816	20.8182	NaN	19.5049	19.3066	5	19.0598	NaN	NaN	18.974	NaN	NaN	2			19.15	36612000	15	1.22667	3.52121	0.0593378
499	Q2YJ89	6-phosphogluconate dehydrogenase, decarboxylating (EC 1.1.1.44)	gnd BAB2_0109	22.7336	20.1635	22.2633	21.1754	20.4349	19.9762	6	21.5523	20.9134	20.6244	21.3322	21.0525	21.8448	6			236.79	178770000	111	0.0688825	-0.0954638	0.853331
500	F2HWT1	Family 1 extracellular solute-binding protein	BM28_B0115	23.2326	23.2207	24.0301	23.5217	23.1832	23.4269	6	23.1062	23.3481	23.2901	23.2401	23.4805	23.4517	6			323.31	762130000	225	0.363625	0.116414	0.432887
501	Q2YJ50	HTH-type quorum sensing-dependent transcriptional regulator VjbR	vjbR BAB2_0118	22.265	19.1695	19.0646	NaN	19.2499	19.0142	5	18.928	NaN	19.2443	18.7091	NaN	19.2421	4			18.774	28607000	13	0.416875	1.57163	0.382935
502	F2HWU1	Endoribonuclease L-PSP	BM28_B0998	24.7996	25.6146	24.2994	25.433	26.1882	26.5139	6	NaN	NaN	NaN	NaN	NaN	NaN	0	+	+	212.62	1826400000	182	11.2088	12.2648	6.18305e-12
503	Q2YJR2	Membrane protein insertase YidC (Foldase YidC) (Membrane integrase YidC) (Membrane protein YidC)	yidC BAB2_0986	20.5299	18.0475	20.0918	19.8381	18.9916	17.7992	6	18.1238	NaN	18.4508	NaN	18.3659	18.2885	4	+		60.419	32953000	16	1.30306	2.60818	0.0497664
504	Q2YJR0	Acetylglutamate kinase (EC 2.7.2.8) (N-acetyl-L-glutamate 5-phosphotransferase) (NAG kinase) (AGK)	argB BAB2_0988	NaN	19.6331	20.2901	19.5095	NaN	18.8105	4	19.3206	19.5749	18.9425	19.0914	18.994	19.44	6			17.352	42111000	25	0.661564	-1.78336	0.21799
505	Q2YJQ8	Uncharacterized protein	BAB2_0990	19.9034	19.0843	20.3585	19.6272	18.8302	18.6595	6	19.2436	19.8476	19.1342	19.173	19.2432	20.8173	6			18.195	62892000	24	0.171564	-0.165924	0.673653
506	Q2YJQ7	2,3,4,5-tetrahydropyridine-2,6-dicarboxylate N-succinyltransferase (EC 2.3.1.117) (Tetrahydrodipicolinate N-succinyltransferase) (THDP succinyltransferase) (THP succinyltransferase) (Tetrahydropicolinate succinylase)	dapD BAB2_0991	21.3677	20.1291	21.1848	20.1352	19.5145	19.3245	6	19.9006	19.6629	19.6213	19.9008	19.6272	20.4931	6			32.841	104610000	28	0.530005	0.408335	0.295118
507	Q2YJQ6	Succinyl-diaminopimelate desuccinylase (SDAP desuccinylase) (EC 3.5.1.18) (N-succinyl-LL-2,6-diaminoheptanedioate amidohydrolase)	dapE BAB2_0993	22.3262	21.3176	22.1037	20.7791	21.5875	21.6257	6	21.2174	21.1148	21.2353	20.9405	21.0836	20.6592	6	+		150.39	178360000	63	1.42644	0.581478	0.0374592
508	Q2YJP7	NADH-ubiquinone oxidoreductase 39 kd subunit (EC 1.6.5.3)	BAB2_1002	19.8449	NaN	19.9236	19.6344	19.0981	NaN	4	18.9822	19.5619	19.4917	19.2092	19.1089	19.8763	6			26.316	41731000	30	0.705098	-1.88487	0.197198
509	Q2YJP0	Methylglyoxal synthase (MGS) (EC 4.2.3.3)	mgsA BAB2_1009	22.5155	23.781	23.6385	23.6857	23.8058	23.665	6	22.2955	21.9521	22.0569	22.0368	22.255	22.4797	6	+	+	174.9	651330000	92	3.96272	1.33591	0.000108963
510	Q2YJN6	2,3-bisphosphoglycerate-dependent phosphoglycerate mutase (BPG-dependent PGAM) (PGAM) (Phosphoglyceromutase) (dPGM) (EC 5.4.2.11)	gpmA BAB2_1013	21.9353	21.3033	22.0301	21.593	21.5755	21.1063	6	22.1824	22.2822	22.1774	22.2366	22.3536	22.3671	6	+	+	59.798	262820000	128	2.97321	-0.675976	0.00106363
511	F2HWY9	Protein SlyX homolog	slyX BM28_B1046	20.6731	22.4154	21.2223	21.5849	22.1635	21.3532	6	22.6564	22.1108	22.4035	22.1245	22.3537	21.6659	6			99.167	149200000	43	1.28411	-0.650366	0.0519859
512	Q2YLA2	Hydroxypyruvate isomerase (EC 5.3.1.22)	BAB2_0144	22.5569	24.2928	22.4035	23.3251	24.2073	24.0038	6	21.5873	21.7401	22.332	21.2217	22.2209	21.5404	6	+	+	243.56	398250000	160	2.88389	1.69116	0.0013065
513	Q2YIS6	L-carnitine dehydratase/bile acid-inducible protein F	BAB2_0162	20.6807	19.7347	19.7898	20.5249	19.8348	NaN	5	19.2475	18.8405	18.3905	19.4227	NaN	19.0795	5			19.533	37997000	20	0.257021	0.930693	0.553323
514	Q2YIS5	Uncharacterized protein	BAB2_0163	20.6211	18.9519	21.4376	18.8124	18.9424	18.7696	6	18.3353	18.2927	18.2989	NaN	18.2752	18.3206	5			9.3871	35544000	13	1.28054	2.13372	0.0524153
515	Q2YIS4	Citrate lyase, beta subunit, putative	BAB2_0164	20.1173	18.9187	20.5651	19.6754	18.426	NaN	5	18.4429	NaN	18.0405	17.7433	18.2254	19.3902	5			90.013	33830000	17	0.295772	0.976713	0.50609
516	F2HX52	Aldo/keto reductase	BM28_B0178	23.157	23.3291	23.0299	22.9955	23.1723	23.0225	6	23.9516	23.7745	23.6625	23.9044	23.996	23.894	6	+	+	323.31	601080000	221	5.92027	-0.746134	1.20152e-06
517	Q2YIH9	Histidine--tRNA ligase (EC 6.1.1.21) (Histidyl-tRNA synthetase) (HisRS)	hisS BAB2_0181	21.17	19.4712	21.3148	20.8658	19.5874	NaN	5	19.4592	19.6927	19.2487	19.6098	19.6822	19.4742	6			17.656	84388000	31	0.0749791	-0.257945	0.841436
518	F2HX58	ATP phosphoribosyltransferase regulatory subunit	hisZ BM28_B0184	19.6409	17.9065	NaN	18.6326	18.2701	NaN	4	18.2352	NaN	17.8389	NaN	18.2796	19.128	4			7.3395	16850000	10	0.0353975	0.161415	0.921727
519	Q2YIJ6	Fumarate hydratase class II (Fumarase C) (EC 4.2.1.2)	fumC BAB2_0186	26.8861	NaN	27.1789	26.4248	NaN	NaN	3	NaN	NaN	27.0092	26.7053	26.8731	27.3815	4			3.6804	6627200000	11	0.233059	-2.37821	0.584711
520	F2HX63	Uncharacterized protein	BM28_B0189	18.0283	18.6254	17.4631	18.28	19.5508	20.5688	6	22.6003	22.0487	22.728	22.4507	22.809	22.1901	6	+	+	169.64	126390000	74	4.8332	-3.71842	1.46824e-05
521	Q2YIJ3	60 kDa chaperonin (GroEL protein) (Protein Cpn60)	groL groEL BAB2_0189	28.6138	28.012	29.0425	28.4222	28.2279	27.85	6	28.1498	28.2594	28.3654	28.1063	28.1818	28.1632	6			323.31	22717000000	1576	0.393223	0.157074	0.404368
522	Q2YIJ2	10 kDa chaperonin (GroES protein) (Protein Cpn10)	groS groES BAB2_0190	27.5758	29.0368	27.7203	28.3553	28.8709	28.9889	6	29.213	29.2666	29.5308	29.1088	29.1849	28.9851	6	+	+	323.31	29822000000	995	1.77486	-0.790192	0.0167936
523	F2HX69	Isoleucine--tRNA ligase (EC 6.1.1.5) (Isoleucyl-tRNA synthetase)	ileS BM28_B0195	20.9098	21.8554	20.7489	21.1302	20.7711	20.5433	6	19.8127	20.4089	20.2699	20.2442	19.9468	20.0688	6	+	+	108.36	122460000	62	2.68506	0.86789	0.0020651
524	Q2YJ33	Uncharacterized protein	BAB2_0195	NaN	21.0046	19.8298	20.7383	21.1481	21.21	5	20.9989	20.9177	21.0101	20.4069	20.8869	20.9238	6			150.09	101340000	45	0.490953	-1.33389	0.322884
525	F2HX75	Zinc protease	BM28_B0201	NaN	NaN	NaN	NaN	NaN	NaN	0	24.8379	24.6959	24.5413	24.5311	24.6904	24.4679	6	+	+	215.77	592660000	176	18.6793	-11.4174	2.0925e-19
526	Q2YJ26	Modulator of DNA gyrase	pmbA BAB2_0205	21.2559	22.3652	NaN	NaN	21.9074	22.1859	4	21.1538	NaN	21.3379	21.346	NaN	NaN	3			3.9453	87072000	20	0.295401	1.77777	0.506523
527	Q2YIH7	Uncharacterized protein	BAB2_0207	23.0198	24.0733	23.3031	23.5262	23.7499	23.8251	6	23.8406	23.514	23.3585	23.357	23.5349	23.4099	6			157.99	835030000	170	0.186531	0.0804291	0.650832
528	F2HXH2	Putative Cytosolic Protein	BM28_B0224	20.5981	21.8135	19.208	20.0593	21.6376	20.4096	6	20.5763	19.4299	20.4301	20.0331	19.8867	19.4483	6			76.318	68622000	28	0.760751	0.653626	0.17348
529	Q2YJU8	Multicopper oxidase, type 1:Copper-containing nitrite reductase:Twin-arginine translocation pathway signal (EC 1.7.2.1)	BAB2_0943	NaN	NaN	NaN	NaN	NaN	NaN	0	22.3427	19.9815	23.6829	21.3449	22.5661	20.5489	6	+	+	181.62	307340000	60	7.50508	-8.5345	3.12548e-08
530	Q2YJV3	Periplasmic binding protein/LacI transcriptional regulator	BAB2_0938	23.3015	23.9208	24.3277	24.0589	23.5103	23.7107	6	23.9259	24.2495	23.9454	23.858	24.0887	24.1415	6			323.31	993760000	396	0.715414	-0.229862	0.192569
531	Q2YJB6	Putative binding protein BAB2_1146	BAB2_1146	22.2473	21.7184	21.8771	22.275	21.398	21.105	6	NaN	NaN	NaN	NaN	NaN	NaN	0	+	+	65.644	115960000	60	12.1667	8.56015	6.81233e-13
532	F2HXS9	Pollen allergen Poa pIX/Phl pVI, C-terminal protein	BM28_B1176	20.7522	22.6688	20.2874	21.0918	21.4801	21.156	6	NaN	NaN	NaN	NaN	NaN	NaN	0	+	+	76.115	59860000	31	9.49973	8.02937	3.16427e-10
533	F2HXT1	Leu/Ile/Val-binding protein family	BM28_B1178	18.9221	NaN	16.1432	NaN	NaN	NaN	2	24.5707	24.7253	24.3207	24.7567	24.74	24.901	6	+	+	323.31	1122500000	373	5.87521	-10.0182	1.33287e-06
534	Q2YJA3	NifH/frxC family:ATPase, ParA type	BAB2_1163	18.0972	17.8625	19.0135	17.9905	NaN	NaN	4	NaN	NaN	NaN	NaN	NaN	NaN	0	+	+	145.9	8489300	5	1.96686	3.35395	0.010793
535	Q2YJY3	Cytochrome c heme-binding site:4Fe-4S ferredoxin, iron-sulfur binding domain:Nitrate reductase, beta subunit (EC 1.7.99.4)	narH BAB2_0905	18.9872	18.4596	19.3357	18.5124	18.2598	NaN	5	NaN	NaN	NaN	NaN	NaN	NaN	0	+	+	13.677	11447000	5	3.22164	4.58411	0.000600292
536	F2HXV5	Nitrate reductase subunit alpha	narG BM28_B0294	21.8663	20.2018	21.1761	20.3426	19.7479	19.322	6	NaN	NaN	NaN	NaN	NaN	18.7783	1	+	+	58.722	50756000	22	4.04054	6.30472	9.10886e-05
537	F2HXV9	Family 1 extracellular solute-binding protein	BM28_B0298	18.1017	18.187	17.4191	18.155	NaN	NaN	4	19.9334	19.7555	19.9918	19.5519	19.9947	19.9766	6	+	+	68.539	46117000	46	2.20276	-3.48683	0.0062696
538	F2HXW3	Uncharacterized protein	BM28_B0302	25.589	26.55	24.8845	25.7808	26.4911	26.3694	6	NaN	NaN	NaN	NaN	NaN	NaN	0	+	+	147.83	1475400000	138	12.4183	12.7341	3.81695e-13
539	Q2YK03	Bacterial extracellular solute-binding protein, family 1	BAB2_0879	22.3643	22.158	22.5397	22.672	22.202	22.2418	6	21.8741	21.6333	21.6581	21.8285	22.0023	21.8846	6	+	+	117.94	388750000	127	3.52086	0.549453	0.000301398
540	Q2YK12	Uncharacterized protein	BAB2_0868	NaN	NaN	NaN	NaN	NaN	NaN	0	24.1381	24.1399	24.0508	23.9408	23.8277	24.1178	6	+	+	157.42	311890000	81	18.8085	-10.8259	1.55413e-19
541	Q2YK18	Probable acid stress chaperone HdeA	hdeA BAB2_0862	27.1754	28.5223	27.3806	27.9328	28.6739	28.8187	6	29.5482	29.5262	29.5224	29.5886	29.6169	28.9205	6	+	+	232.23	30288000000	449	2.94673	-1.36985	0.00113049
542	Q2YK29	Inosine-5'-monophosphate dehydrogenase (IMP dehydrogenase) (IMPD) (IMPDH) (EC 1.1.1.205)	guaB BAB2_0851	22.838	20.7913	23.0636	22.3001	21.6866	21.5828	6	21.1542	22.0549	21.1781	21.7461	21.7261	21.9418	6			175.74	405270000	142	0.511375	0.410206	0.308053
543	Q2YK40	UPF0423 protein BAB2_0840	BAB2_0840	27.7351	29.0607	27.086	27.9423	28.913	28.7597	6	28.4865	28.2257	28.8066	28.2423	28.4428	27.92	6			323.31	15268000000	608	0.115519	-0.104541	0.766445
544	F2HY19	Acetate kinase (EC 2.7.2.1) (Acetokinase)	ackA BM28_B0358	20.9555	21.9717	20.6016	22.0161	22.4442	22.196	6	20.8122	NaN	21.4825	21.8928	21.6258	22.0692	5			129.51	125850000	68	0.499449	1.51545	0.316629
545	F2HY41	Extracellular solute-binding protein	BM28_B0380	22.5442	20.9727	23.0859	20.8395	20.429	20.0395	6	18.4446	18.979	18.3838	18.748	19.3318	19.8831	6	+	+	275.56	164990000	69	2.80268	2.35676	0.00157515
546	F2HY58	Outer membrane protein Omp31	BM28_B0397	25.4987	26.6698	25.1001	25.9074	26.5693	26.4926	6	18.7088	17.301	18.4265	19.1104	18.601	18.0388	6	+	+	323.31	1275000000	158	8.8546	7.67525	1.39764e-09
547	Q2YK77	Peptide methionine sulfoxide reductase MsrB (EC 1.8.4.12) (Peptide-methionine (R)-S-oxide reductase)	msrB BAB2_0792	21.192	22.99	22.2173	22.1916	21.9166	22.0034	6	18.3147	17.5028	17.9803	17.6155	17.3218	17.4953	6	+	+	71.771	106480000	42	7.61818	4.38012	2.40892e-08
548	F2HYA4	Cupin domain protein	BM28_B0443	24.9079	26.4188	24.6595	25.6343	26.0823	25.9271	6	20.4937	20.9606	20.7217	20.5999	20.7922	20.2486	6	+	+	133.21	1168400000	188	7.88456	4.96889	1.30449e-08
549	Q2YKA5	Uncharacterized protein	BAB2_0759	20.8003	19.9634	20.9873	19.856	20.0683	19.4412	6	21.5505	21.7506	20.8734	20.7375	21.6586	21.6364	6	+	+	50.577	101660000	33	2.54342	-1.18174	0.00286143
550	Q2YKA8	Glyoxalase/Bleomycin resistance protein/dioxygenase domain	BAB2_0756	21.2766	21.0343	22.2756	21.2044	20.0006	19.9068	6	NaN	NaN	NaN	NaN	NaN	NaN	0	+	+	87.64	61676000	20	8.9554	7.7397	1.10814e-09
551	Q2YKC1	Molybdenum cofactor biosynthesis protein	BAB2_0741	20.2446	18.8463	19.8094	18.7412	18.4127	18.2971	6	NaN	18.3074	18.3014	18.2087	NaN	NaN	3	+	+	87.49	24491000	19	1.73965	3.31731	0.0182116
552	Q2YKC2	Uncharacterized protein	BAB2_0740	19.7941	21.455	20.7304	20.8913	20.3585	20.0542	6	19.6219	19.6356	19.8155	19.8395	19.6743	19.3474	6	+	+	60.37	70070000	20	2.2218	0.891572	0.00600063
553	Q2YKD6	Cytochrome bd ubiquinol oxidase subunit X (EC 1.10.3.14)	cydX ybgT BAB2_0726	NaN	NaN	19.1316	NaN	NaN	NaN	1	21.1866	NaN	NaN	21.844	21.2486	21.6474	4	+		96.443	49228000	16	1.3221	-4.5275	0.0476326
554	F2HYE9	GntR family transcriptional regulator	BM28_B0488	20.0338	NaN	20.6526	18.76	18.341	18.1292	5	NaN	NaN	NaN	NaN	NaN	NaN	0	+	+	56.623	26392000	13	3.03132	4.97778	0.00093043
555	Q2YKD8	ATPase, BadF/BadG/BcrA/BcrD type (EC 2.7.1.59)	BAB2_0724	23.2497	21.4147	23.2132	21.831	21.1588	21.6234	6	19.7774	NaN	18.6559	19.0991	NaN	19.3493	4	+	+	132.45	229530000	65	2.35666	4.86484	0.00439889
556	Q2YKE6	Transketolase, central region:Transketolase, C terminal (EC 1.2.4.4)	BAB2_0714	21.9802	21.0546	22.2957	21.8653	19.899	20.0507	6	19.9087	20.0167	20.1635	19.6705	19.6511	19.2427	6	+	+	149.33	333020000	116	2.03197	1.41538	0.00929021
557	Q2YKE7	Biotin/lipoyl attachment:Catalytic domain of components of various dehydrogenase complexes:2-oxo acid dehydrogenase, acyltran (EC 2.3.1.12)	BAB2_0713	24.3288	22.6429	25.3048	23.8759	22.9861	22.264	6	NaN	NaN	NaN	NaN	NaN	NaN	0	+	+	274.19	671350000	141	9.09448	10.3571	8.0449e-10
558	Q2YKF7	ATP/GTP-binding site motif A (P-loop):ABC transporter:AAA ATPase	BAB2_0703	22.1639	18.6998	22.1777	21.879	20.593	NaN	5	20.838	20.9598	20.7022	20.7366	20.1436	21.0958	6			323.31	314040000	142	0.285805	-0.958738	0.517839
559	F2HYG8	Binding-protein-dependent transport systems inner membrane component	BM28_B0507	22.4171	NaN	22.2724	21.6767	21.8926	NaN	4	NaN	NaN	NaN	NaN	NaN	NaN	0	+	+	27.457	209540000	19	1.99097	5.90314	0.0102101
560	Q2YKG0	Bacterial extracellular solute-binding protein, family 5	BAB2_0700	27.8099	28.9781	27.6457	28.242	28.9315	28.9598	6	28.1058	27.7988	28.119	27.6933	27.9178	27.6692	6			323.31	14552000000	1495	1.18796	0.543812	0.0648697
561	Q2YKG3	Uncharacterized protein	BAB2_0697	NaN	NaN	17.4402	NaN	NaN	NaN	1	19.9093	22.5778	21.5974	20.0293	21.9537	19.7201	6	+	+	4.1976	63546000	20	5.00113	-7.04956	9.97399e-06
562	Q2YKI2	Uncharacterized protein	BAB2_0677	20.5923	22.0715	20.2004	21.0689	21.8068	22.3315	6	21.8535	21.8667	22.3613	22.0974	22.2643	21.8838	6			183.3	151220000	72	1.10848	-0.709269	0.077897
563	F2HYJ5	Ferroxidase (EC 1.16.3.1)	BM28_B0534	28.0342	29.7468	27.5497	28.7175	29.6679	30.0618	6	29.0375	28.577	29.0297	28.9712	29.3957	28.7046	6			323.31	19078000000	654	0.00815142	0.0103712	0.981406
564	Q2YKJ4	Uncharacterized protein	BAB2_0665	24.169	24.1521	24.3258	24.3128	24.4979	24.4327	6	23.8713	23.138	22.7474	23.2843	24.2725	24.1023	6	+	+	109.1	1075100000	125	1.84302	0.745753	0.0143542
565	F2HYK9	Family 5 extracellular solute-binding protein	BM28_B0548	21.8125	21.0465	21.5349	19.8393	20.4802	20.0797	6	20.4371	19.8593	20.202	20.2	20.0609	20.2722	6			49.12	87920000	35	1.04281	0.62691	0.0906129
566	F2HYL6	Bifunctional protein GlmU	glmU BM28_B0555	20.0566	18.7462	20.4114	19.8467	18.7518	18.7501	6	18.2832	NaN	NaN	18.363	NaN	18.5445	3	+	+	29.112	30879000	19	1.88649	3.62367	0.0129872
567	Q2YKL3	Glutamyl-tRNA(Gln) amidotransferase subunit A (Glu-ADT subunit A) (EC 6.3.5.7)	gatA BAB2_0646	21.7011	21.4724	22.4372	21.6778	21.1678	20.7185	6	19.9847	20.1367	20.2885	NaN	20.3199	20.0983	5			223.94	158580000	63	1.22942	2.52278	0.0589636
568	F2HYM8	Aspartyl/glutamyl-tRNA(Asn/Gln) amidotransferase subunit C (Asp/Glu-ADT subunit C) (EC 6.3.5.-)	gatC BM28_B0567	20.2787	20.0018	NaN	21.0192	20.8395	NaN	4	NaN	NaN	NaN	NaN	NaN	NaN	0	+	+	9.518	38138000	17	1.98387	4.88319	0.0103784
569	Q2YKL5	UPF0173 metal-dependent hydrolase BAB2_0644	BAB2_0644	24.9111	26.5265	24.7782	25.6598	26.3501	26.6186	6	28.9203	28.4117	28.8524	28.7002	28.8795	28.684	6	+	+	323.31	9384000000	523	5.1847	-2.93397	6.53578e-06
570	F2HYN2	Acyl-CoA dehydrogenase	BM28_B0571	18.633	18.4137	NaN	18.6747	18.2887	NaN	4	18.6809	NaN	18.2644	NaN	NaN	NaN	2			24.027	22710000	7	0.543004	1.77415	0.286415
571	Q2YKL9	Dihydroorotase (DHOase) (EC 3.5.2.3)	pyrC BAB2_0640	19.8601	18.9181	19.5589	19.287	19.0426	NaN	5	NaN	NaN	NaN	NaN	18.9049	NaN	1	+	+	21.558	33861000	17	1.849	4.15362	0.0141579
572	Q2YKM8	50S ribosomal protein L33	rpmG BAB2_0631	19.2905	NaN	19.7853	20.354	NaN	20.0381	4	20.2264	20.6775	NaN	20.0526	20.3081	20.0011	5			14.523	89263000	50	0.342843	-1.43131	0.454105
573	Q2YKN7	Uncharacterized protein	BAB2_0620	22.1645	23.9858	22.4475	22.6092	22.7691	23.7402	6	21.4591	21.564	21.8777	22.1251	22.1684	22.2736	6	+	+	204.61	633440000	94	1.98369	1.0414	0.0103826
574	F2HYR5	Amidohydrolase 3	BM28_B0604	27.3639	28.8067	26.1061	27.2783	28.5745	28.6151	6	15.0696	13.5111	NaN	NaN	NaN	NaN	2	+	+	323.31	4380900000	333	9.93494	14.2207	1.1616e-10
575	Q2YKR4	Renal dipeptidase (EC 3.4.13.19)	BAB2_0586	NaN	NaN	NaN	NaN	NaN	NaN	0	19.1108	19.5872	19.2989	19.1875	19.4753	19.2432	6	+	+	8.4894	22253000	14	14.7934	-6.10715	1.6091e-15
576	Q2YKR5	sn-glycerol-3-phosphate-binding periplasmic protein UgpB	ugpB BAB2_0585	24.6728	24.7625	25.4889	25.1591	24.7788	25.1123	6	23.1678	22.6008	22.7545	22.7034	22.8254	23.0676	6	+	+	323.31	1519800000	271	7.08735	2.14248	8.17811e-08
577	F2HYT9	sn-glycerol-3-phosphate import ATP-binding protein UgpC (EC 3.6.3.20)	ugpC BM28_B0628	20.911	18.9293	21.7234	19.749	19.3965	NaN	5	NaN	NaN	19.4451	19.1293	NaN	NaN	2			30.966	57515000	10	1.21593	3.7508	0.0608239
578	F2HYU8	Aminotransferase	BM28_B0637	25.652	27.0685	25.7879	26.5368	26.8598	26.9826	6	26.9006	27.189	26.9609	27.2096	27.2644	26.7827	6			323.31	4258300000	459	1.24536	-0.569935	0.0568384
579	F2HYV2	Uncharacterized protein	BM28_B0641	21.9877	21.0788	NaN	21.2826	22.0147	22.081	5	20.9831	NaN	20.8415	20.6587	20.8352	21.2419	5			271.2	109430000	77	0.129159	0.647419	0.742748
580	F2HYV3	Aldehyde dehydrogenase	BM28_B0642	24.8041	24.5638	25.6216	24.9648	24.5485	24.0955	6	23.7805	23.8888	23.7094	23.6876	23.9015	23.7966	6	+	+	323.31	1196400000	316	2.99767	0.972319	0.00100537
581	Q2YKT4	Periplasmic binding protein	BAB2_0564	20.6112	20.7613	21.1983	20.6379	19.9181	20.1207	6	19.0057	18.7586	19.3695	18.8263	18.9793	19.5329	6	+	+	75.514	62147000	26	4.14634	1.46254	7.13933e-05
582	F2HYW0	Family 3 extracellular solute-binding protein	BM28_B0649	25.4666	25.7296	26.2389	25.9848	25.5125	25.8351	6	22.8257	22.5732	21.3917	21.26	22.5243	21.4134	6	+	+	323.31	2706300000	406	6.55436	3.79651	2.79022e-07
583	F2HYW9	Putative sugar-binding periplasmic protein	BM28_B0658	23.7071	21.8617	23.0918	23.4246	22.346	22.7689	6	NaN	NaN	NaN	NaN	NaN	NaN	0	+	+	35.606	653440000	48	10.9959	9.65669	1.00959e-11
584	F2HYX7	Family 1 extracellular solute-binding protein	BM28_B0666	23.3758	23.3889	24.1224	23.1406	23.2946	22.911	6	NaN	NaN	NaN	NaN	19.5415	NaN	1	+	+	222.26	289950000	73	5.17234	9.10698	6.72456e-06
585	Q2YKV9	Superoxide dismutase [Cu-Zn] (EC 1.15.1.1)	sodC BAB2_0535	28.8277	30.223	28.7811	29.3431	30.2942	30.3999	6	31.1737	30.69	31.0237	30.8881	30.9956	30.8398	6	+	+	323.31	75483000000	1848	2.66907	-1.29034	0.00214254
586	F2HYZ2	Rhizopine catabolism protein mocA	BM28_B0681	19.355	18.8529	19.9104	18.7834	NaN	18.9891	5	NaN	NaN	NaN	NaN	NaN	NaN	0	+	+	76.556	15969000	10	3.22396	4.97346	0.000597086
587	Q2YKX0	IolE protein KO: K03335 IolE protein	BAB2_0524	21.4041	19.1339	19.3773	19.2204	19.0233	18.7634	6	NaN	NaN	18.5779	NaN	18.5155	18.5828	3	+	+	25.663	30203000	9	1.77214	3.6027	0.016899
588	Q2YKX1	IolB protein KO: K03337 IolB protein	BAB2_0523	19.9035	20.9881	19.6494	19.4528	19.306	19.3167	6	NaN	NaN	NaN	NaN	NaN	19.3494	1	+	+	10.077	24896000	8	3.42352	5.53617	0.000377118
589	Q2YKX9	Glycine dehydrogenase (decarboxylating) (EC 1.4.4.2) (Glycine cleavage system P-protein) (Glycine decarboxylase) (Glycine dehydrogenase (aminomethyl-transferring))	gcvP BAB2_0515	19.294	18.4826	19.0294	NaN	18.8893	NaN	4	21.7817	22.172	22.8133	22.4435	22.0722	22.2566	6	+	+	170.28	190420000	90	2.80711	-5.23735	0.00155915
590	F2HZ05	Glycine cleavage system H protein	gcvH BM28_B0694	21.1545	20.5687	21.1301	21.134	20.9164	21.0849	6	22.9488	23.7208	23.4125	23.0053	22.6391	22.9296	6	+	+	216.18	399920000	60	6.35388	-2.11126	4.42707e-07
591	F2HZ06	Aminomethyltransferase (EC 2.1.2.10)	gcvT BM28_B0695	20.9144	19.8657	21.7484	20.5908	20.2167	19.2083	6	21.9544	22.1465	22.2659	21.9622	22.2185	22.3451	6	+	+	208.11	163770000	62	3.09621	-1.7247	0.000801285
592	Q2YKY9	Lectin-like protein BA14k	BAB2_0505	20.9174	21.6738	21.2341	22	22.1105	22.5368	6	20.5522	20.6682	21.1237	21.185	21.2073	21.7743	6			99.023	154780000	71	1.27057	0.660336	0.0536331
593	F2HZ16	Substrate-binding region of ABC-type glycine betaine transport system	BM28_B0705	26.4736	27.6624	26.1794	27.3551	27.7723	27.9754	6	23.3457	23.1308	23.2693	23.157	23.4059	22.9585	6	+	+	323.31	6563300000	583	6.87394	4.02517	1.33678e-07
594	F2HZ20	Alanine racemase domain-containing protein	BM28_B0709	20.0804	21.5045	19.3631	20.7735	20.9393	21.4727	6	NaN	NaN	NaN	NaN	NaN	NaN	0	+	+	7.9104	43172000	17	9.0675	7.47894	8.56055e-10
595	F2HZ24	Family 1 extracellular solute-binding protein	BM28_B0713	24.0893	24.5489	24.1563	24.3348	24.1242	23.8266	6	23.2279	22.7327	22.8079	22.709	22.8001	23.0012	6	+	+	323.31	663460000	239	5.84649	1.30018	1.42401e-06
596	Q2YL07	Periplasmic binding protein	BAB2_0483	20.6655	20.5265	NaN	NaN	20.4949	20.7137	4	21.0006	NaN	21.0622	21.0664	21.1221	21.4245	5			9.4335	95645000	18	0.365641	-1.67753	0.430883
597	Q2YL14	Glutamate--cysteine ligase, plant (EC 6.3.2.2)	BAB2_0476	19.2528	18.0846	19.2294	18.9269	NaN	NaN	4	NaN	NaN	NaN	NaN	NaN	NaN	0	+	+	9.0713	15953000	9	1.97076	3.7756	0.0106965
598	Q2YL19	Glutamine synthetase, catalytic domain (EC 6.3.1.2)	BAB2_0471	21.2573	18.7829	21.9631	19.4428	19.1386	18.7641	6	18.212	18.7827	NaN	NaN	NaN	18.617	3	+	+	26.355	50873000	18	1.90952	4.01787	0.0123162
599	F2HZ53	3-ketoacyl-(Acyl-carrier-protein) reductase	BM28_B0742	19.6432	18.4741	20.7893	19.1659	18.573	NaN	5	18.7541	18.6142	18.6644	NaN	18.2393	19.0643	5			69.326	39580000	13	0.152078	0.551521	0.704567
600	Q2YL30	Glucose-6-phosphate 1-dehydrogenase (G6PD) (EC 1.1.1.49)	zwf BAB2_0460	22.0663	19.5394	22.9592	21.6659	20.977	20.246	6	19.7097	21.1702	20.441	20.7193	20.6852	21.6507	6			64.883	168550000	50	0.404832	0.512982	0.393702
601	Q2YL31	6-phosphogluconolactonase:Glucosamine/galactosami ne-6-phosphate isomerase (EC 3.1.1.31)	pgl BAB2_0459	20.2849	20.5293	20.4043	20.4892	NaN	NaN	4	20.0957	20.2098	20.3428	20.5132	NaN	20.5976	5			57.049	67856000	24	0.245294	-1.14023	0.568469
602	Q2YL33	Bifunctional protein FolD [Includes: Methylenetetrahydrofolate dehydrogenase (EC 1.5.1.5); Methenyltetrahydrofolate cyclohydrolase (EC 3.5.4.9)]	folD BAB2_0457	20.3546	20.5602	20.4834	20.0423	19.5338	19.6946	6	21.0834	20.0194	20.498	20.4154	20.3592	20.5623	6			283	77554000	36	0.909872	-0.378139	0.123063
603	Q2YL40	Uncharacterized protein	BAB2_0450	21.2774	20.4447	22.173	20.3685	20.416	19.5744	6	21.0437	21.1785	20.1971	21.0834	20.7808	20.5173	6			20.81	99363000	25	0.0843459	-0.0911449	0.823482
604	F2HZ71	Repressor protein C	BM28_B0760	19.2377	18.7278	20.3848	18.9878	18.8075	NaN	5	NaN	NaN	NaN	NaN	NaN	NaN	0	+	+	31.458	21004000	7	3.17665	5.01594	0.000665815
605	F2HZ72	Fatty acid oxidation complex subunit alpha	BM28_B0761	23.4113	22.4777	23.6772	22.7938	22.0631	21.385	6	20.916	21.3015	20.9905	20.9062	20.9451	21.5416	6	+	+	323.31	274480000	85	2.74996	1.53454	0.00177844
606	Q2YL65	Thiolase (EC 2.3.1.16)	BAB2_0443	23.7268	22.46	24.1135	23.0426	22.4503	21.8329	6	21.4249	21.7806	21.0956	21.2291	21.7006	21.7245	6	+	+	323.31	340720000	140	2.53027	1.44517	0.00294935
607	F2HZ74	Acyl-CoA dehydrogenase domain-containing protein	BM28_B0763	22.7409	21.8706	22.655	21.9793	22.138	21.5241	6	18.7263	NaN	19.272	19.8168	19.4602	19.2971	5	+	+	102.51	120770000	50	2.3772	3.85426	0.00419566
608	F2HZ79	Acyl-CoA dehydrogenase	BM28_B0768	24.4871	20.9168	24.231	22.1193	21.1433	19.6227	6	18.1222	NaN	16.492	18.4418	NaN	18.0346	4	+	+	171.02	245110000	54	2.99432	5.83493	0.00101316
609	F2HZ84	Nickel ABC transporter periplasmic nickel-binding protein	nikA BM28_B0773	23.7172	23.6739	24.0243	23.3893	23.4107	23.077	6	NaN	NaN	NaN	NaN	NaN	NaN	0	+	+	276.05	299730000	98	14.4775	10.3387	3.33067e-15
610	F2HZ90	ABC transporter periplasmic substrate-binding protein	BM28_B0779	20.7103	20.32	21.3177	21.3423	20.2137	20.0908	6	19.1529	19.7941	19.256	19.4026	19.5327	19.6646	6	+	+	17.612	74616000	16	3.16924	1.19866	0.000677273
611	Q2YIY5	Uncharacterized protein	BAB2_0415	20.6364	20.8168	NaN	NaN	20.8095	20.5021	4	20.2984	NaN	20.3457	20.292	19.801	20.0782	5			3.3683	56713000	11	0.161637	-0.806763	0.689228
612	Q2YIX0	DEAD/DEAH box helicase:Helicase, C-terminal:Type I site-specific deoxyribonuclease HsdR (EC 3.1.21.3)	hsdR BAB2_0395	19.6995	NaN	NaN	NaN	NaN	NaN	1	NaN	NaN	18.7492	19.7026	18.8629	19.017	4			2.2949	13458000	3	0.933399	-2.83369	0.116574
613	F2HZD4	Rhizopine-binding protein	BM28_B0823	22.9851	24.2311	22.9139	22.9547	23.7725	23.7069	6	NaN	NaN	NaN	NaN	NaN	NaN	0	+	+	75.616	310300000	34	12.1799	10.2174	6.60805e-13
614	Q2YIP9	Uncharacterized protein	BAB2_0374	21.081	19.3145	20.8003	20.1808	19.4846	19.1324	6	19.3619	19.4788	19.3406	19.0887	19.5031	19.7727	6			67.519	55471000	28	0.894908	0.57467	0.127377
615	F2HZF3	Inosine-uridine preferring nucleoside hydrolase	iunH BM28_B0006	19.5554	18.8192	18.8835	18.7138	18.8968	NaN	5	19.4685	19.0749	19.209	19.6471	19.3837	19.4689	6			44.02	28243000	29	0.718309	-1.36224	0.191289
616	F2HZF8	Adenine nucleotide translocator 1	BM28_B0011	NaN	NaN	NaN	NaN	NaN	NaN	0	18.2593	18.2348	18.4087	NaN	18.3043	17.9244	5	+	+	3.7854	9411300	12	3.25975	-4.18024	0.00054986
617	F2HZG8	Pentapeptide MXKDX repeat protein	BM28_B0021	26.1817	26.4907	25.4862	26.925	26.6301	26.7145	6	21.353	20.29	NaN	NaN	20.5396	20.3553	4	+	+	88.187	2322400000	88	3.39404	8.24503	0.000403609
618	Q2YL87	Bacterial regulatory protein, GntR family	BAB2_0022	20.963	19.0229	21.1391	21.174	19.1673	19.1389	6	NaN	NaN	NaN	NaN	17.9204	NaN	1	+	+	21.73	76568000	14	4.30666	6.10578	4.93565e-05
619	Q2YL86	Leu/Ile/Val-binding protein homolog 4	BAB2_0023	22.247	22.5234	22.6174	22.5247	22.2233	22.2442	6	23.8166	24.0486	23.5893	23.615	23.5305	23.8339	6	+	+	276.34	415790000	165	6.68362	-1.34234	2.07196e-07
620	Q2YIQ7	Ribose/galactose isomerase (EC 5.3.1.6)	BAB2_0366	24.9816	26.2778	24.5674	25.4342	26.1992	25.9432	6	26.0978	26.068	26.0221	26.1624	25.8745	25.6721	6			323.31	2919000000	375	0.73061	-0.41558	0.185947
621	Q2YIQ8	Ketose-bisphosphate aldolase, class-II:Fructose-bisphosphate aldolase, class II, Calvin cycle subtype (EC 4.1.2.13)	fbaA BAB2_0365	24.2169	23.5686	24.013	23.5339	23.6538	23.2036	6	22.1769	21.718	21.6599	21.7218	21.6998	21.9657	6	+	+	291.85	961120000	251	6.19041	1.8746	6.45041e-07
622	Q2YIR2	Elongation factor G, C-terminal:Elongation factor, GTP-binding:ATP/GTP-binding site motif A (P-loop):Elongation factor Tu, do	BAB2_0361	20.008	NaN	20.6311	NaN	NaN	NaN	2	19.9476	19.4752	NaN	19.6336	19.6986	20.0117	5			18.545	55245000	13	0.893168	-3.08294	0.127889
623	Q2YL46	Peptidase M3:Neutral zinc metallopeptidases, zinc-binding region (EC 3.4.15.5)	dcp BAB2_0358	22.6063	21.1139	22.3281	21.3106	19.6641	19.3725	6	19.2738	20.5016	19.3252	19.8507	19.722	19.4424	6	+		77.093	121400000	41	1.4285	1.37994	0.0372819
624	Q2YL48	Uncharacterized protein	BAB2_0356	21.8881	22.3956	21.2139	22.4258	22.5318	22.7536	6	21.1047	20.878	21.3865	20.1771	20.9416	NaN	5			55.481	218750000	76	1.11316	2.58516	0.0770625
625	F2HZK0	Citrate lyase subunit beta	BM28_B0846	19.7187	NaN	NaN	NaN	19.5213	NaN	2	NaN	NaN	17.9104	18.2272	NaN	18.5326	3			9.8422	20815000	26	0.0770171	-0.37004	0.837496
626	Q2YL53	Legume lectin, beta domain:OsmC-like protein	ohr BAB2_0351	22.0933	21.886	22.1603	21.9524	22.047	22.2932	6	23.0339	22.9953	22.2132	22.1694	22.2983	22.6852	6	+	+	204.36	404310000	83	1.79107	-0.493836	0.016178
627	Q2YL55	Aspartate-semialdehyde dehydrogenase (ASA dehydrogenase) (ASADH) (EC 1.2.1.11) (Aspartate-beta-semialdehyde dehydrogenase)	asd BAB2_0349	18.47	18.1353	18.7058	NaN	NaN	18.7621	4	NaN	NaN	18.1484	NaN	18.3079	NaN	2			57.236	25855000	35	0.594753	1.86615	0.254242
628	F2HZK9	3-isopropylmalate dehydrogenase (EC 1.1.1.85) (3-IPM-DH) (Beta-IPM dehydrogenase)	leuB BM28_B0855	20.0966	19.8412	21.0687	20.0383	19.5357	NaN	5	19.4055	19.1453	19.2944	19.3058	NaN	19.0324	5			62.868	53493000	10	0.190423	0.732847	0.645026
629	Q2YL59	UPF0434 protein BAB2_0345	BAB2_0345	20.2515	21.3835	19.5141	20.4974	20.3514	20.899	6	20.2398	19.8264	20.8976	20.5112	20.5938	NaN	5			81.698	116800000	49	0.483064	1.26969	0.328803
630	F2HZL2	Peptidase S16 lon domain-containing protein	BM28_B0858	20.2176	19.4425	20.3754	19.3287	NaN	NaN	4	NaN	NaN	NaN	NaN	NaN	19.3217	1			21.666	34146000	4	1.10378	3.40208	0.0787449
631	Q2YL61	Thioredoxin:Thioredoxin type domain:Thioredoxin domain 2	trx-2 BAB2_0343	18.6379	20.3012	19.0977	NaN	NaN	20.0502	4	18.9087	19.5378	19.6791	19.2983	19.6227	19.3058	6			39.352	46314000	40	0.752444	-1.97422	0.17683
632	Q2YIG4	ATP/GTP-binding site motif A (P-loop):Ornithine cyclodeaminase/mu-crystallin (EC 4.3.1.12)	BAB2_0338	NaN	NaN	NaN	NaN	NaN	NaN	0	19.8683	19.5938	19.8015	19.9317	20.3204	20.5168	6	+	+	91.209	44354000	26	12.4492	-6.79542	3.55458e-13
633	Q2YIG5	Arginase (EC 3.5.3.1)	rocF BAB2_0337	18.6407	NaN	18.8633	NaN	NaN	NaN	2	21.559	21.5878	20.5409	21.3789	21.4531	21.5278	6	+	+	146.12	103160000	50	3.47468	-6.28394	0.000335211
634	Q2YIG7	NADH:flavin oxidoreductase/NADH oxidase	BAB2_0335	25.3321	24.8738	25.3056	24.7524	24.4828	24.1314	6	23.1094	22.9759	22.8626	23.185	23.0141	22.972	6	+	+	323.31	879100000	181	5.43907	1.79319	3.63856e-06
635	F2HZN0	N-acetylglucosamine-6-phosphate deacetylase (EC 3.5.1.25) (GlcNAc 6-P deacetylase)	nagA BM28_B0876	23.2119	23.8182	23.5151	23.688	23.6318	23.5405	6	24.6827	24.572	24.4598	24.7721	24.5957	24.5282	6	+	+	246.04	697100000	216	6.11879	-1.03415	7.60688e-07
636	Q2YJ13	Sugar isomerase (SIS) (EC 3.5.99.6)	nagB BAB2_0323	20.2982	19.6369	20.924	20.4548	18.3703	NaN	5	21.4152	21.7152	21.2838	21.4368	21.5759	21.0902	6			210.52	134130000	32	1.2834	-2.60382	0.0520719
637	Q2YIL0	D-amino acid dehydrogenase (EC 1.4.99.1)	dadA BAB2_0311	22.7975	21.3437	22.4207	21.5179	20.9574	19.6144	6	19.7796	19.7349	19.4106	19.78	19.6298	20.5668	6	+	+	154.8	109380000	32	2.11585	1.62498	0.00765863
638	F2HZQ1	Imidazolonepropionase (EC 3.5.2.7)	hutI BM28_B0897	NaN	NaN	NaN	NaN	NaN	NaN	0	21.7278	22.3357	22.2616	22.1465	22.0961	22.2078	6	+	+	115.31	121040000	59	15.7016	-8.91927	1.98803e-16
639	Q2YIM0	Aminotransferase, class IV (EC 2.6.1.21)	BAB2_0301	21.2927	20.5566	21.6459	21.5419	20.9426	NaN	5	20.6504	20.9441	20.2723	20.6774	21.1232	21.2114	6			84.963	136320000	47	0.302738	-0.948178	0.498037
640	Q2YJ19	KDPG and KHG aldolase (EC 4.1.2.21)	BAB2_0296	18.6554	NaN	19.0699	19.1597	NaN	NaN	3	21.7572	21.3571	21.9663	21.3888	22.0216	21.7545	6	+	+	130.37	158920000	52	2.83891	-5.62176	0.00144908
641	Q2YJ22	Oxidoreductase, N-terminal:Oxidoreductase, C-terminal (EC 1.1.1.48)	BAB2_0293	NaN	NaN	NaN	18.4902	NaN	NaN	1	21.804	21.4632	21.1636	21.1248	21.4147	21.5467	6	+	+	62.011	123430000	30	5.05677	-7.32945	8.77462e-06
642	Q2YLB2	Pyruvate decarboxylase (EC 2.2.1.6)	BAB2_0289	23.0391	21.9064	22.9768	22.1845	21.4431	20.8686	6	22.2361	22.4771	22.0866	22.3979	22.3735	22.5643	6			267.59	357610000	123	0.357328	-0.286139	0.43921
643	F2HZT8	Lipoprotein	BM28_B0934	23.0874	23.9338	23.0714	23.5877	23.7272	23.9091	6	26.5273	26.3492	26.5203	26.374	26.3587	26.1615	6	+	+	323.31	2718100000	449	7.95135	-2.82905	1.11853e-08
644	Q2YIV7	Uncharacterized protein	BAB2_0272	20.0309	21.7508	19.8812	20.5115	NaN	21.0137	5	NaN	19.9582	20.2533	NaN	NaN	NaN	2			46.586	70884000	33	1.146	3.89113	0.0714504
645	Q2YIV8	RNA-binding region RNP-1 (RNA recognition motif):TPR repeat	BAB2_0271	22.1489	23.0093	21.9651	22.6025	22.5995	22.7276	6	22.1962	22.3815	22.393	21.8523	22.0447	22.0492	6			170.48	276270000	103	1.12333	0.355998	0.0752785
646	Q2YIM4	NAD(P) transhydrogenase subunit beta (EC 1.6.1.2) (Nicotinamide nucleotide transhydrogenase subunit beta)	pntB BAB2_0263	20.614	18.0961	19.1242	20.8146	18.2228	18.0039	6	NaN	NaN	NaN	NaN	NaN	NaN	0	+	+	7.0145	20963000	12	6.30948	5.93592	4.90363e-07
647	Q2YIM5	Antifreeze protein, type I:Pollen allergen Poa pIX/Phl pVI, C-terminal	pntAB BAB2_0262	18.3704	18.2397	21.4598	18.1839	18.5028	18.2228	6	NaN	17.9174	NaN	NaN	NaN	NaN	1	+	+	91.981	27520000	11	3.34137	4.83533	0.000455647
648	F2HZV1	Alanine dehydrogenase/PNT domain-containing protein	BM28_B0947	23.5664	20.4683	23.9144	22.231	21.3402	20.5849	6	19.1296	17.9777	18.7509	18.6692	17.9204	19.8924	6	+	+	323.31	236660000	73	3.1902	3.29418	0.000645358
649	Q2YJ02	Bacterial regulatory protein LacI, HTH motif:Periplasmic binding protein/LacI transcriptional regulator	BAB2_0250	19.4998	NaN	21.0119	19.4296	18.9201	NaN	4	NaN	NaN	NaN	NaN	NaN	NaN	0	+	+	4.5236	24227000	4	1.94587	4.33689	0.0113275
650	F2HZW6	Cobalamin synthesis protein P47K	BM28_B0962	21.1484	19.7506	NaN	20.5581	19.9165	19.1137	5	NaN	NaN	19.4574	20.0437	NaN	NaN	2			37.904	63332000	29	1.10376	3.55938	0.0787482
651	Q2YIK0	Sulfoxide reductase catalytic subunit YedY (EC 1.8.-.-)	yedY BAB2_0243	20.144	20.6446	19.5626	19.4761	20.2813	NaN	5	22.9286	22.7217	22.8309	22.6332	22.5559	21.8936	6	+	+	91.02	201530000	100	2.02115	-3.70756	0.00952458
652	Q2YJ55	Biphenyl-2,3-diol 1,2-dioxygenase III (EC 1.13.11.39)	BAB2_0231	21.7534	22.2297	22.0696	21.5439	21.8206	21.5196	6	21.6252	21.7111	21.4681	21.621	21.7635	22.2713	6			106.71	156320000	67	0.197787	0.0794331	0.63418
653	Q2YJS1	DNA gyrase, subunit B:Short-chain dehydrogenase/reductase SDR:Glucose/ribitol dehydrogenase	BAB2_0975	19.5208	NaN	19.7573	19.0278	NaN	NaN	3	20.992	21.1153	20.7604	21.3033	20.6502	21.5959	6	+	+	156.65	156380000	61	2.15788	-4.74686	0.00695216
654	Q2YIL6	Histidine ammonia-lyase (Histidase) (EC 4.3.1.3)	hutH BAB2_0305	NaN	NaN	NaN	NaN	NaN	NaN	0	20.6113	21.1031	21.1981	20.989	20.7949	20.9889	6	+	+	53.828	56317000	28	15.1046	-7.73755	7.85872e-16
655	Q2YIL8	Urocanate hydratase (Urocanase) (EC 4.2.1.49) (Imidazolonepropionate hydrolase)	hutU BAB2_0303	NaN	NaN	NaN	NaN	NaN	NaN	0	24.1446	24.4797	24.5919	24.6669	24.6259	24.2453	6	+	+	279.2	686180000	164	16.6637	-11.2491	2.16917e-17
656	Q2YIN7	Molybdenum ABC transporter, periplasmic binding protein	modA BAB2_0087	21.254	22.0389	20.4607	21.9508	22.3815	23.474	6	25.1993	24.8185	25.0196	25.0395	25.1991	25.1573	6	+	+	323.31	1023100000	222	4.66931	-3.14558	2.14137e-05
657	Q2YIU5	FMN-dependent alpha-hydroxy acid dehydrogenase:FMN/related compound-binding core (EC 1.1.2.3)	lldD BAB2_0315	20.6542	NaN	21.2548	NaN	20.8561	NaN	3	20.5577	20.5242	NaN	20.7956	20.1062	20.5018	5			26.01	67812000	15	0.496569	-2.21674	0.318736
658	Q2YIW0	30S ribosomal protein S21	rpsU BAB2_0269	21.1317	21.0196	21.6621	22.1333	21.5363	21.1323	6	20.2855	20.5078	20.8071	20.8457	20.7817	20.356	6	+	+	52.677	151060000	70	2.72236	0.838593	0.00189513
659	Q2YIX5	Uncharacterized protein	BAB2_0388	23.7124	21.0177	23.8258	21.5074	21.2638	19.0038	6	18.1888	17.8999	17.7452	18.0848	17.4711	18.8994	6	+	+	186.29	169450000	46	3.12731	3.67363	0.000745916
660	Q2YIY2	Periplasmic binding protein/LacI transcriptional regulator	rbsB-2 BAB2_0377	26.9292	27.8622	27.0395	27.6452	27.758	27.7817	6	28.2662	28.1839	28.6318	28.2152	28.4139	28.0455	6	+	+	323.31	12328000000	869	2.76032	-0.79011	0.00173651
661	Q2YJ16	Aldehyde dehydrogenase (EC 1.2.1.-)	BAB2_0327	20.3278	19.3357	20.0803	19.0549	18.9549	18.4884	6	23.7317	24.4483	23.5603	23.9728	23.5252	23.817	6	+	+	323.31	1049400000	177	7.17445	-4.46889	6.69195e-08
662	Q2YJ21	Dihydroxy-acid and 6-phosphogluconate dehydratase:ATP/GTP-binding site motif A (P-loop) (EC 4.2.1.6)	BAB2_0294	NaN	NaN	NaN	NaN	NaN	NaN	0	21.5329	22.0065	21.8441	21.4756	21.7296	21.965	6	+	+	302.83	186540000	93	15.3855	-8.54893	4.1164e-16
663	Q2YJ23	Sugar transporter	BAB2_0292	NaN	NaN	NaN	NaN	NaN	NaN	0	20.6224	21.1387	20.6907	20.7234	20.6937	20.5536	6	+	+	13.9	69402000	16	15.1279	-7.52709	7.44869e-16
664	Q2YJ35	Putative nickel-responsive regulator	BAB2_0432	NaN	NaN	NaN	NaN	NaN	NaN	0	19.5859	19.749	19.6703	19.5344	19.5632	19.5745	6	+	+	3.9483	23249000	6	18.488	-6.40289	3.25122e-19
665	Q2YJ77	Type IV secretion system putative lipoprotein virB7	virB7 BAB2_0062	25.6763	27.1068	24.9018	23.393	24.7713	24.3551	6	24.7116	24.1139	22.6553	23.2264	24.7697	23.0371	6			21.771	1076500000	47	1.15198	1.28172	0.0704728
666	Q2YJ81	Type IV secretion system protein virB10	virB10 BAB2_0059	20.6882	21.1903	19.6495	NaN	20.9734	20.1945	5	20.7683	20.5763	20.3926	20.7317	20.5012	20.7423	6			160.32	48291000	30	0.494527	-1.30108	0.320238
667	Q2YJ83	Type IV secretion system putative outer membrane lipoprotein BAB2_0057	BAB2_0057	21.5905	22.751	20.3414	20.1514	22.2712	21.7549	6	22.442	22.4524	22.1726	21.6627	21.6676	21.4092	6			27.142	126150000	39	0.50546	-0.491044	0.312277
668	Q2YJE8	ATP/GTP-binding site motif A (P-loop):Periplasmic binding protein/LacI transcriptional regulator:Twin-arginine translocation	xylF BAB2_1109	21.7994	22.2214	22.5506	22.3847	21.6109	21.1666	6	21.9617	22.0767	21.6243	21.475	21.5305	21.8266	6			323.31	1271500000	230	0.395504	0.206474	0.40225
669	Q2YJH5	High-affinity zinc uptake system protein ZnuA	znuA BAB2_1079	NaN	17.2511	17.237	NaN	NaN	NaN	2	19.1111	19.6618	18.5204	18.6458	19.8178	20.3788	6	+	+	18.484	15542000	12	3.47962	-4.80126	0.00033142
670	Q2YJM1	Peptide methionine sulfoxide reductase MsrA (Protein-methionine-S-oxide reductase) (EC 1.8.4.11) (Peptide-methionine (S)-S-oxide reductase) (Peptide Met(O) reductase)	msrA BAB2_1029	19.6631	19.0878	20.2144	19.7543	18.9382	18.7556	6	18.2673	18.6826	18.384	18.3568	18.393	18.8472	6	+	+	58.622	37627000	32	2.38137	0.913768	0.0041556
671	Q2YJN7	4-hydroxy-tetrahydrodipicolinate reductase (HTPA reductase) (EC 1.17.1.8)	dapB BAB2_1012	19.3547	18.2331	19.2747	NaN	NaN	NaN	3	20.6725	NaN	20.4335	20.1508	20.6737	21.4725	5			151.44	61264000	35	1.03216	-3.35341	0.0928618
672	Q2YJP1	Peptidase family U6, penicillin-insensitive murein endopeptidase (EC 3.4.-.-)	mepA BAB2_1008	18.955	18.9619	18.8606	19.3268	NaN	NaN	4	19.2389	19.6919	19.13	19.2932	19.0096	19.2341	6			106.43	19973000	18	0.969511	-2.17889	0.107273
673	Q2YJS2	Bacterial extracellular solute-binding protein, family 5	BAB2_0974	21.3779	19.5422	20.8755	21.896	20.5759	19.4969	6	21.0694	22.066	21.2652	21.7388	20.8477	22.0087	6			323.31	230320000	104	1.09861	-0.871898	0.0796883
674	Q2YJT0	Dihydrodipicolinate synthetase (EC 4.2.1.52)	BAB2_0961	17.1605	NaN	15.5481	16.5035	NaN	NaN	3	18.2325	15.8523	16.3771	17.3529	17.1084	18.0265	6	+	+	323.31	384330000	58	1.73958	-2.35126	0.0182148
675	Q2YJV5	Short-chain dehydrogenase/reductase SDR:Glucose/ribitol dehydrogenase (EC 1.1.1.56)	BAB2_0935	19.7901	19.2537	20.0465	NaN	19.3139	19.0836	5	21.3284	20.5919	20.9971	20.8795	21.0215	21.3002	6	+		14.865	63127000	38	1.43938	-2.57015	0.0363596
676	Q2YJW2	Nitrous-oxide reductase (EC 1.7.2.4) (N(2)OR) (N2O reductase)	nosZ BAB2_0928	NaN	NaN	NaN	NaN	NaN	NaN	0	22.2562	20.1039	22.9851	20.6412	22.1287	20.4179	6	+	+	113.64	201660000	106	7.98317	-8.21218	1.0395e-08
677	Q2YK02	Uncharacterized protein	BAB2_0880	25.1027	26.3845	25.679	26.569	26.0107	25.9828	6	28.6389	28.5013	28.3643	28.2814	28.3658	28.2591	6	+	+	323.31	9603000000	467	6.19877	-2.447	6.3275e-07
678	Q2YK26	Peptidase family T4	BAB2_0854	20.1226	20.8626	20.2836	20.3569	20.8569	20.6255	6	19.9284	19.9617	19.7612	20.1262	20.0367	20.1287	6	+	+	56.528	81920000	58	2.45535	0.527549	0.00350466
679	Q2YK32	Catalase (EC 1.11.1.6)	BAB2_0848	29.3253	30.3632	28.7413	29.6581	30.2542	30.0963	6	30.2119	30.0362	30.0639	30.1988	30.2546	29.8588	6			323.31	47525000000	2250	0.709623	-0.36431	0.195154
680	Q2YK44	Probable phosphoketolase (EC 4.1.2.-)	BAB2_0836	26.57	25.3282	27.091	25.5468	24.7636	25.312	6	25.2618	26.2768	24.5721	25.3676	25.1168	25.0542	6			96.697	1871400000	28	0.56399	0.49374	0.272904
681	Q2YKE5	2-oxoisovalerate dehydrogenase E1 component, alpha subunit (EC 1.2.4.4)	BAB2_0715	20.6995	NaN	20.7063	19.6998	NaN	NaN	3	NaN	NaN	18.4101	NaN	18.8174	19.0064	3			88.291	160110000	53	0.156367	0.811934	0.697642
682	Q2YKG1	Bacterial extracellular solute-binding protein, family 5	BAB2_0699	26.1707	25.5741	26.5437	26.0184	25.6369	25.5205	6	24.9416	24.7643	24.9671	24.6964	25.0233	24.9428	6	+	+	323.31	7309100000	820	3.81387	1.02146	0.000153509
683	Q2YKI4	Ferroxidase (EC 1.16.3.1)	bfr BAB2_0675	NaN	NaN	NaN	NaN	NaN	NaN	0	25.6926	24.5034	25.4575	25.41	25.4958	25.1753	6	+	+	61.898	730990000	73	14.0994	-12.0791	7.95406e-15
684	Q2YKN9	Uncharacterized protein	BAB2_0618	20.2992	22.1326	20.5948	20.7854	21.8959	22.4797	6	23.6594	22.5259	23.8214	23.8555	23.8476	23.4198	6	+	+	53.033	443160000	119	3.29169	-2.157	0.000510874
685	Q2YKP4	Solute-binding protein/glutamate receptor:Ionotropic glutamate receptor:Bacterial extracellular solute-binding protein, family 3	BAB2_0612	NaN	NaN	NaN	NaN	NaN	NaN	0	22.3161	22.3338	22.41	22.3701	22.5368	22.5378	6	+	+	217.77	187840000	88	19.2176	-9.20744	6.05961e-20
686	Q2YKP5	Solute-binding protein/glutamate receptor:Ionotropic glutamate receptor:Bacterial extracellular solute-binding protein, family 3	BAB2_0611	NaN	NaN	NaN	NaN	NaN	NaN	0	NaN	19.0702	18.9931	18.9024	NaN	NaN	3	+		17.712	14501000	11	1.30664	-2.88929	0.0493586
687	Q2YKP6	NAD binding site:UBA/THIF-type NAD/FAD binding fold:Pyridine nucleotide-disulphide oxidoreductase, class I	BAB2_0610	18.5598	NaN	18.8945	18.0909	NaN	NaN	3	NaN	17.9946	17.8479	NaN	NaN	18.0936	3			217.72	158110000	39	0.0604229	0.268212	0.870116
688	Q2YKP7	Twin-arginine translocation pathway signal	BAB2_0607	23.7517	25.0503	22.8314	24.2076	24.9228	23.4349	6	NaN	NaN	NaN	NaN	NaN	NaN	0	+	+	22.182	381230000	17	10.4961	10.8231	3.19094e-11
689	Q2YKQ9	Leu/Ile/Val-binding protein homolog 6	BAB2_0593	21.9108	22.0614	22.4454	22.1474	21.8947	21.7835	6	20.3383	20.4239	20.7323	20.3255	20.533	20.284	6	+	+	323.31	206790000	119	7.01799	1.60103	9.59432e-08
690	Q2YKU9	Bacterial extracellular solute-binding protein, family 1	BAB2_0547	25.4653	25.5139	26.4192	26.3277	25.3846	25.6063	6	NaN	NaN	NaN	NaN	NaN	NaN	0	+	+	323.31	6210500000	593	13.8612	12.5762	1.37668e-14
691	Q2YKV1	6,7-dimethyl-8-ribityllumazine synthase 2 (DMRL synthase 2) (LS 2) (Lumazine synthase 2) (EC 2.5.1.78) (Type II lumazine synthase)	ribH2 ribH-2 BAB2_0545	23.5398	22.1291	22.5902	22.2483	22.3741	22.2346	6	22.2265	21.8814	21.9965	22.9705	22.3039	22.5651	6			135.72	304670000	107	0.315491	0.195355	0.483626
692	Q2YKW2	Alkyl hydroperoxide reductase AhpD (EC 1.11.1.15) (Alkylhydroperoxidase AhpD)	ahpD BAB2_0532	NaN	NaN	NaN	NaN	NaN	NaN	0	22.3778	21.724	21.4622	22.0895	21.5886	22.9014	6	+	+	323.31	229880000	106	11.5865	-8.81391	2.59108e-12
693	Q2YKW3	Alkyl hydroperoxide reductase/ Thiol specific antioxidant/ Mal allergen (EC 1.8.1.-)	ahpC BAB2_0531	NaN	NaN	NaN	NaN	NaN	NaN	0	21.9576	21.6492	21.8033	21.3059	21.7593	21.8118	6	+	+	61.112	101470000	43	15.3068	-8.5045	4.93373e-16
694	Q2YKX5	Bacterial periplasmic spermidine/putrescine-binding protein:Gliadin, alpha/beta:Bacterial extracellular solute-binding protei	BAB2_0519	24.7857	25.7927	24.7567	25.3252	25.8362	26.0024	6	24.5459	24.2145	24.8924	24.2045	24.7868	24.4973	6	+	+	323.31	1938400000	390	2.27272	0.892929	0.00533681
695	Q2YKX6	Bacterial extracellular solute-binding protein, family 3:Aldehyde dehydrogenase:Proline dehydrogenase:delta-1-pyrroline-5-car (EC 1.5.99.8)	BAB2_0518	21.004	18.6095	20.6935	19.2409	17.2835	NaN	5	NaN	17.6768	17.2314	18.0646	17.652	17.2255	5			234.01	108950000	37	0.5169	1.49686	0.304158
696	Q2YLB9	Leu/Ile/Val-binding protein family	BAB2_0282	23.1231	22.4167	23.5963	23.3515	21.7964	22.1423	6	23.836	24.0654	23.9707	24.0053	23.9875	24.0423	6	+	+	323.31	621960000	249	2.7407	-1.24682	0.00181677
697	Q2YLE7	ATP synthase epsilon chain (ATP synthase F1 sector epsilon subunit) (F-ATPase epsilon subunit)	atpC BAB1_1806	NaN	20.1773	19.9701	NaN	20.0435	NaN	3	20.2858	20.8441	20.8125	NaN	NaN	NaN	3			71.733	86915000	32	0.0457913	-0.2919	0.89993
698	Q2YLF3	4-hydroxyproline epimerase (EC 5.1.1.8) (Hydroxyproline-2-epimerase) (HyPRE)	prpA BAB1_1800	NaN	NaN	NaN	NaN	NaN	NaN	0	20.5604	20.0726	20.5387	20.4976	20.4154	20.3846	6	+	+	93.246	122540000	42	15.5322	-7.20154	2.93627e-16
699	Q2YLF8	Leu/Ile/Val-binding protein homolog 1	BAB1_1794	23.7084	24.928	24.1795	24.555	24.8884	25.063	6	23.0808	23.0189	23.3159	23.0362	23.2122	23.0246	6	+	+	323.31	1525700000	273	4.1979	1.43894	6.34019e-05
700	Q2YLG0	Leu/Ile/Val-binding protein homolog 2	BAB1_1792	24.1153	24.729	24.2372	24.571	25.0029	25.0071	6	24.4079	24.7365	24.9281	24.5638	24.5795	24.5592	6			323.31	2551400000	401	0.038767	-0.0187594	0.914604
701	Q2YLG9	ATP/GTP-binding site motif A (P-loop):Bacterial NAD-glutamate dehydrogenase (EC 1.4.1.2)	BAB1_1827	24.034	22.3272	24.0741	23.1484	21.9844	21.2979	6	20.8859	21.2744	21.2464	20.983	20.5103	21.1883	6	+	+	323.31	427170000	155	2.4315	1.79629	0.00370257
702	Q2YLH5	Acetyl-coenzyme A synthetase (AcCoA synthetase) (Acs) (EC 6.2.1.1) (Acetate--CoA ligase) (Acyl-activating enzyme)	acsA BAB1_1819	22.4508	20.6754	22.3866	21.8226	20.0576	19.8875	6	19.627	19.483	19.2441	19.5628	19.6061	NaN	5	+		142.95	236290000	75	1.42446	2.75791	0.0376303
703	Q2YLI5	ATP synthase subunit alpha (EC 3.6.3.14) (ATP synthase F1 sector subunit alpha) (F-ATPase subunit alpha)	atpA BAB1_1809	23.7717	22.6082	23.9308	23.7066	22.4411	22.0444	6	21.7141	21.9752	22.2187	22.0312	22.0053	22.1267	6	+	+	323.31	655800000	198	1.99578	1.07194	0.0100976
704	Q2YLJ8	ATP/GTP-binding site motif A (P-loop):Aldehyde dehydrogenase (EC 1.2.1.27)	mmsA BAB1_1840	23.0688	22.209	23.4009	22.9946	21.7918	21.43	6	21.6932	21.8021	21.7747	21.8214	22.0118	22.1233	6			292.98	420050000	236	1.03398	0.611413	0.0924731
705	Q2YLK6	30S ribosomal protein S16	rpsP BAB1_1832	23.0485	23.9586	22.969	23.7891	23.4906	23.3589	6	24.1189	24.8593	24.8507	24.744	24.3638	23.9618	6	+	+	323.31	1035700000	244	3.0253	-1.04731	0.000943406
706	Q2YLM5	Porphobilinogen deaminase (PBG) (EC 2.5.1.61) (Hydroxymethylbilane synthase) (HMBS) (Pre-uroporphyrinogen synthase)	hemC BAB1_1887	22.8005	24.1116	22.743	23.2884	23.8444	23.771	6	24.0191	23.5369	23.6258	23.7021	23.5752	23.567	6			129.92	631030000	169	0.465907	-0.244534	0.342052
707	Q2YLN2	Glutaredoxin:Thioredoxin type domain	grxC BAB1_1879	22.4711	23.477	22.904	22.463	23.4621	23.192	6	22.3185	22.031	22.2295	21.8798	21.8608	22.0519	6	+	+	183.39	449590000	116	3.02145	0.932945	0.000951809
708	Q2YLS7	Dihydrolipoyl dehydrogenase (EC 1.8.1.4)	lpdA-2 BAB1_1918	23.9876	23.7272	24.1975	23.3632	23.4166	22.908	6	27.3062	27.2967	27.8691	28.0206	27.7638	27.6617	6	+	+	323.31	4211600000	664	8.20489	-4.05298	6.23894e-09
709	Q2YLU4	Arginine biosynthesis bifunctional protein ArgJ	argJ BAB1_1942	22.4048	22.8406	22.4382	22.7213	22.9068	23.1262	6	22.6248	22.5849	22.383	22.5219	22.5135	22.6025	6			323.31	405370000	211	0.907951	0.201205	0.123609
710	Q2YLY1	Laccase domain protein	BAB1_1546	22.8238	23.9518	23.3313	23.3492	23.8817	23.7498	6	24.1668	23.9534	23.7608	23.8592	23.7722	23.7769	6			163.51	619640000	168	1.11066	-0.36696	0.0775068
711	Q2YLZ2	UDP-3-O-[3-hydroxymyristoyl] N-acetylglucosamine deacetylase (EC 3.5.1.-) (UDP-3-O-acyl-GlcNAc deacetylase)	lpxC BAB1_1443	18.6686	18.3813	18.8406	18.2905	18.7226	18.6179	6	NaN	NaN	NaN	NaN	NaN	NaN	0	+	+	30.983	17849000	6	13.5891	5.37691	2.57572e-14
712	Q2YLZ8	30S ribosomal protein S12	rpsL BAB1_1260	23.1009	23.4811	22.3451	25.2669	23.8133	24.2572	6	23.6624	24.3886	24.3848	24.1749	24.1479	23.8181	6			93.828	1051200000	120	0.411443	-0.385357	0.387754
713	Q2YM00	Elongation factor G (EF-G)	fusA BAB1_1258	25.2543	24.2096	25.4949	24.9372	24.1798	23.9594	6	23.8963	24.241	23.9231	24.0543	23.793	24.0846	6	+		323.31	1646100000	431	1.50298	0.673809	0.0314067
714	Q2YM05	50S ribosomal protein L23	rplW BAB1_1253	22.2349	22.9474	21.8258	22.8794	22.7633	22.0687	6	23.3725	23.5359	23.698	23.4783	23.3031	22.7363	6	+	+	257.74	539460000	156	2.47646	-0.900767	0.00333838
715	Q2YM07	30S ribosomal protein S19	rpsS BAB1_1251	22.1961	22.6389	21.5146	22.6168	22.0161	22.4184	6	22.6327	23.004	23.5312	23.1142	22.4996	22.5535	6	+	+	100.89	376870000	109	1.68179	-0.655719	0.0208072
716	Q2YM22	Carbamoyl-phosphate synthase small chain (EC 6.3.5.5) (Carbamoyl-phosphate synthetase glutamine chain)	carA BAB1_1502	19.2181	NaN	19.0734	18.5582	18.6428	NaN	4	NaN	17.6429	NaN	NaN	18.1674	NaN	2			35.786	28186000	19	0.730993	2.21036	0.185783
717	Q2YM39	Antifreeze protein, type I	BAB1_1464	20.8981	21.2594	20.7435	21.0131	19.9713	NaN	5	21.4605	21.2493	21.8225	21.3337	21.776	21.4598	6			248.76	273210000	86	0.828989	-2.00109	0.148256
718	Q2YM63	Ribosomal RNA small subunit methyltransferase H (EC 2.1.1.199) (16S rRNA m(4)C1402 methyltransferase) (rRNA (cytosine-N(4)-)-methyltransferase RsmH)	rsmH mraW BAB1_1458	18.5363	17.5727	NaN	18.1371	17.5696	NaN	4	NaN	NaN	NaN	NaN	NaN	NaN	0	+	+	19.124	6237000	8	1.96936	3.16262	0.010731
719	Q2YMC0	Uncharacterized protein	BAB1_0418	NaN	19.2448	NaN	18.5084	NaN	NaN	2	25.704	25.408	25.8565	25.6107	25.6956	25.3051	6	+	+	219.93	858170000	94	5.26847	-10.4978	5.38923e-06
720	Q2YMC4	ATP synthase subunit b 2 (ATP synthase F(0) sector subunit b 2) (ATPase subunit I 2) (F-type ATPase subunit b 2) (F-ATPase subunit b 2)	atpF2 BAB1_0414	20.6588	20.1302	20.2927	20.0931	19.9845	NaN	5	20.5318	NaN	20.2143	19.5479	20.0303	19.9713	5			144.4	78662000	18	0.0306288	0.143962	0.931904
721	Q2YMC5	ATP synthase subunit b 1 (ATP synthase F(0) sector subunit b 1) (ATPase subunit I 1) (F-type ATPase subunit b 1) (F-ATPase subunit b 1)	atpF1 BAB1_0413	21.348	20.8018	21.5254	20.7671	20.519	20.4839	6	21.6631	22.4571	21.6178	22.3433	22.1487	21.5301	6	+	+	94.683	251430000	55	2.84009	-1.05249	0.00144514
722	Q2YMD8	Uncharacterized protein	BAB1_0437	NaN	NaN	NaN	NaN	NaN	NaN	0	19.016	NaN	18.8479	18.9564	NaN	18.8927	4	+	+	31.345	17404000	19	1.9944	-3.81217	0.0101297
723	Q2YME1	Threonylcarbamoyl-AMP synthase (TC-AMP synthase) (EC 2.7.7.87) (L-threonylcarbamoyladenylate synthase)	BAB1_0434	23.154	24.3322	22.5545	23.6193	24.1837	24.022	6	23.9592	23.8641	23.9905	24.0151	23.9567	23.6307	6			172.17	747960000	221	0.41349	-0.258422	0.385931
724	Q2YME2	Glycine--tRNA ligase beta subunit (EC 6.1.1.14) (Glycyl-tRNA synthetase beta subunit)	glyS BAB1_0433	18.9685	18.3092	18.7455	18.1586	NaN	NaN	4	NaN	NaN	NaN	NaN	NaN	18.5255	1			39.804	16027000	18	1.03316	2.67104	0.0926498
725	Q2YMR6	Superoxide dismutase (EC 1.15.1.1)	BAB1_0591	23.9036	NaN	NaN	NaN	NaN	23.7459	2	24.7789	24.495	24.7767	24.494	24.7581	24.7598	6	+	+	138.28	1059500000	82	2.27241	-7.92881	0.00534057
726	Q2YMX0	Membrane alanine aminopeptidase:Neutral zinc metallopeptidases, zinc-binding region (EC 3.4.11.2)	pepN BAB1_0641	20.9618	19.5366	21.5248	20.3346	19.4838	NaN	5	19.2555	18.8376	19.3969	19.4115	19.443	19.6312	6			67.868	69916000	17	0.0439679	-0.154018	0.903716
727	Q2YMY1	4-hydroxy-tetrahydrodipicolinate synthase (HTPA synthase) (EC 4.3.3.7)	dapA BAB1_0666	25.091	26.6313	25.1949	25.8676	26.4781	26.5666	6	26.459	26.4773	26.5868	26.3886	26.4063	26.2107	6			323.31	4523500000	588	0.820549	-0.449832	0.151165
728	Q2YMZ2	Antifreeze protein, type I	BAB1_0655	NaN	NaN	NaN	NaN	NaN	NaN	0	19.7831	19.3249	20.311	NaN	19.7332	19.9375	5	+	+	17.218	19709000	16	3.24757	-5.50662	0.000565492
729	Q2YN11	GTP pyrophosphokinase rsh (EC 2.7.6.5) ((p)ppGpp synthase) (ATP:GTP 3'-pyrophosphotransferase)	rsh BAB1_0672	19.3654	NaN	20.3308	21.0753	19.6528	NaN	4	NaN	NaN	NaN	NaN	19.1468	19.4101	2			40.77	39325000	14	0.664427	2.57455	0.216557
730	Q2YN28	Uncharacterized protein	BAB1_0691	NaN	NaN	NaN	NaN	NaN	NaN	0	19.0964	19.0849	19.4171	19.2906	19.1449	19.1812	6	+	+	5.2052	15727000	8	16.1852	-5.99249	6.52817e-17
731	Q2YN31	Dihydroorotase (DHOase) (EC 3.5.2.3)	pyrC-1 pyrC BAB1_0688	23.7373	25.2269	23.6158	24.6918	25.1174	25.7728	6	25.7568	25.8973	26.1343	25.8428	25.9434	25.878	6	+	+	318.91	2199800000	432	2.18445	-1.21511	0.00653958
732	Q2YN33	OmpA-like transmembrane domain	BAB1_0722	NaN	NaN	NaN	NaN	NaN	NaN	0	20.4003	21.0104	20.6356	NaN	20.3612	NaN	4	+	+	2.7237	34426000	12	1.99058	-4.92792	0.0102193
733	Q2YN40	Nucleoside diphosphate kinase (NDK) (NDP kinase) (EC 2.7.4.6) (Nucleoside-2-P kinase)	ndk BAB1_0715	26.0506	27.4765	26.3501	26.7593	27.2775	27.2331	6	27.9985	27.8788	28.015	27.9638	28.0541	27.9015	6	+	+	323.31	9857100000	643	3.10649	-1.11078	0.000782547
734	Q2YN48	LPS-assembly protein LptD	lptD BAB1_0707	NaN	NaN	19.0645	NaN	NaN	NaN	1	NaN	20.4253	NaN	20.1889	20.3455	20.2501	4			4.0522	39120000	10	1.2081	-3.75257	0.0619302
735	Q2YN51	ETC complex I subunit conserved region	BAB1_0739	19.3182	20.4057	19.8758	NaN	20.1398	20.212	5	20.2797	20.0455	NaN	20.1529	20.226	20.0851	5			30.456	67848000	31	0.0299965	-0.139602	0.933262
736	Q2YN59	Phosphoribosylformylglycinamidine cyclo-ligase (EC 6.3.3.1) (AIR synthase) (AIRS) (Phosphoribosyl-aminoimidazole synthetase)	purM BAB1_0731	19.3505	NaN	19.4445	NaN	NaN	NaN	2	NaN	NaN	NaN	18.7741	18.3232	NaN	2			25.266	28022000	9	0.059034	0.282934	0.872903
737	Q2YN61	Uncharacterized protein	BAB1_0729	19.5169	21.092	19.3149	19.392	20.4375	20.4011	6	22.7537	22.8839	23.02	22.1772	22.0769	22.6709	6	+	+	248.02	267390000	90	4.78125	-2.57137	1.65482e-05
738	Q2YN92	Rhodopsin-like GPCR superfamily:Lumazine-binding protein (EC 2.5.1.9)	BAB1_0790	22.9101	24.4825	23.1203	23.2838	24.1145	24.213	6	25.2708	25.0064	24.8584	24.9079	24.7279	24.8596	6	+	+	323.31	1151000000	342	2.92023	-1.25112	0.00120163
739	Q2YNA1	Enoyl-CoA hydratase/isomerase (EC 4.2.1.17)	BAB1_0781	20.7871	NaN	22.1943	20.42	19.3807	NaN	4	NaN	NaN	NaN	NaN	NaN	NaN	0	+	+	43.205	69263000	14	1.93381	4.99034	0.0116463
740	Q2YNB8	Integration host factor subunit alpha (IHF-alpha)	ihfA himA BAB1_0799	22.7133	23.1443	23.0602	22.6698	22.6432	22.253	6	22.8165	23.0218	22.785	22.8209	22.4049	22.524	6			123.03	377670000	119	0.0406785	0.0184511	0.910587
741	Q2YNC6	6,7-dimethyl-8-ribityllumazine synthase 1 (DMRL synthase 1) (LS 1) (Lumazine synthase 1) (EC 2.5.1.78) (Type I lumazine synthase)	ribH1 BAB1_0791	20.0893	21.6357	20.741	20.1928	20.4809	20.6812	6	23.2701	23.4728	22.7177	23.7791	23.457	22.0505	6	+	+	158.96	272220000	43	4.55922	-2.48773	2.75916e-05
742	Q2YND4	Uncharacterized protein	BAB1_0817	21.347	22.7832	21.5943	22.2635	22.4807	22.8427	6	24.1697	24.7255	24.3888	24.4114	24.3811	24.1134	6	+	+	297.95	732760000	191	4.92614	-2.14638	1.18539e-05
743	Q2YND8	50S ribosomal protein L13	rplM BAB1_0811	20.8156	19.2553	20.3231	18.8673	19.1988	19.7435	6	21.9054	20.9815	22.1347	21.0529	20.8865	22.1688	6	+	+	267.39	285620000	100	3.03096	-1.82102	0.000931184
744	Q2YND9	30S ribosomal protein S9	rpsI BAB1_0810	23.4835	23.2369	23.4076	24.0556	23.8179	23.8546	6	24.5377	24.7919	25.0028	24.6059	24.4849	24.0918	6	+	+	323.31	1071100000	217	3.43386	-0.943166	0.000368249
745	Q2YNE3	Proline--tRNA ligase (EC 6.1.1.15) (Prolyl-tRNA synthetase) (ProRS)	proS BAB1_0842	NaN	NaN	NaN	NaN	NaN	NaN	0	NaN	19.9555	20.3243	20.09	19.7628	20.0771	5	+	+	7.5547	27164000	19	3.26283	-5.69327	0.000545967
746	Q2YNG7	ATP/GTP-binding site motif A (P-loop):BolA-like protein	BAB1_0856	24.2332	25.9358	24.5822	24.8076	25.4246	25.4839	6	24.8798	24.2996	25.0801	24.3511	24.5901	24.702	6			110.63	1677100000	281	0.768929	0.427429	0.170244
747	Q2YNH2	30S ribosomal protein S4	rpsD BAB1_0851	24.9331	25.5337	24.8903	25.6367	25.326	25.2964	6	25.5799	25.9109	25.9439	25.9464	25.7149	25.415	6	+	+	323.31	2804600000	541	1.97564	-0.482466	0.010577
748	Q2YNH7	Solute-binding protein/glutamate receptor:Ionotropic glutamate receptor:Bacterial extracellular solute-binding protein, family 3	BAB1_0881	21.4642	20.5128	19.2591	20.9971	22.2073	22.9308	6	23.1718	23.9317	23.8853	23.6305	23.5571	23.4316	6	+	+	242.48	611170000	120	2.86813	-2.37277	0.00135479
749	Q2YNI1	Aldose 1-epimerase (EC 5.1.3.3) (Galactose mutarotase)	galM BAB1_0876	18.7238	18.6643	20.2056	18.9113	18.713	NaN	5	17.9529	NaN	18.4973	18.0824	18.012	18.1865	5			67.378	24557000	6	0.238556	0.747837	0.577356
750	Q2YNJ3	HpcH/HpaI aldolase	BAB1_0864	21.1586	20.4406	21.0295	19.4411	20.1472	19.3757	6	20.6722	20.5912	19.1494	20.0583	19.7568	21.1307	6			30.248	75379000	30	0.032032	0.0390231	0.928898
751	Q2YNJ4	Uncharacterized protein	BAB1_0863	NaN	NaN	NaN	NaN	NaN	NaN	0	22.6842	21.1097	22.7121	22.6457	22.9269	21.9629	6	+	+	24.691	138320000	30	10.7621	-9.13026	1.72939e-11
752	Q2YNJ9	Arginine--tRNA ligase (EC 6.1.1.19) (Arginyl-tRNA synthetase) (ArgRS)	argS BAB1_0896	22.2229	21.313	22.2508	21.3869	21.0198	19.9706	6	NaN	20.2541	19.6238	20.4916	20.4355	20.304	5			68.538	116800000	38	1.05033	2.30749	0.0890573
753	Q2YNM6	Serine--tRNA ligase (EC 6.1.1.11) (Seryl-tRNA synthetase) (SerRS) (Seryl-tRNA(Ser/Sec) synthetase)	serS BAB1_0904	24.1434	25.9982	24.2829	25.0801	25.4193	24.9933	6	25.3822	25.1636	24.9466	25.0149	25.228	25.0562	6			323.31	1798600000	438	0.20192	-0.145715	0.628175
754	Q2YNP3	Acetyl-CoA carboxylase, biotin carboxylase:Carbamoyl-phosphate synthase L chain, ATP-binding:Carbamoyl-phosphate synthetase l (EC 6.3.4.14)	accC BAB1_0924	23.2943	22.2325	23.1487	22.8377	21.9339	21.5766	6	21.9303	22.2495	21.8186	22.0859	21.8401	22.1966	6			323.31	388380000	167	0.886068	0.483776	0.129997
755	Q2YNP5	Uncharacterized protein	BAB1_0922	22.0985	22.9429	20.6376	22.6115	23.8555	24.0217	6	23.0618	22.0062	23.3127	22.5959	22.9603	22.9793	6			66.503	428140000	107	0.0847778	-0.124777	0.822663
756	Q2YNR9	Valine--tRNA ligase (EC 6.1.1.9) (Valyl-tRNA synthetase)	valS BAB1_0966	19.6731	19.2411	20.962	19.6362	19.3653	19.4098	6	NaN	19.405	19.6169	19.4125	19.1676	19.6155	5			17.883	49233000	12	0.602032	1.31001	0.250016
757	Q2YNU1	Aconitate hydratase (Aconitase) (EC 4.2.1.3)	BAB1_0090	24.4237	23.4774	24.6327	23.7295	22.8751	22.5239	6	23.5139	23.4917	23.1914	23.4359	23.2701	23.7296	6			323.31	887540000	280	0.19861	0.171611	0.63298
758	Q2YNV7	Cyclic beta 1-2 glucan synthetase	BAB1_0108	20.4866	18.5417	20.8071	19.4915	18.7439	NaN	5	18.9042	18.6362	18.3497	NaN	18.7154	19.2875	5			192.82	53834000	26	0.190206	0.696312	0.645348
759	Q2YNW1	Prokaryotic sulfate-/thiosulfate-binding protein:Bacterial extracellular solute-binding protein, family 1	BAB1_0104	22.1746	22.7524	22.7961	22.2837	22.1989	19.9226	6	27.9181	27.2515	27.7476	27.8946	27.7775	27.7653	6	+	+	323.31	5834700000	443	6.79888	-5.70441	1.589e-07
760	Q2YNZ8	Response regulator receiver:Helix-turn-helix, Fis-type	BAB1_0136	21.9655	20.6447	21.7332	20.8545	21.0265	21.1719	6	21.8902	21.0609	21.1044	21.1083	20.8421	21.0165	6			147.76	173750000	49	0.0894778	0.0623144	0.813808
761	Q2YP08	Heat shock protein Hsp20	BAB1_0162	23.6543	23.2866	24.0705	23.3664	23.107	22.5375	6	22.5234	22.7516	22.7481	22.758	22.7413	22.7596	6	+	+	150.62	480920000	112	1.80705	0.623375	0.0155938
762	Q2YP11	Sigma 54 modulation protein/ribosomal protein S30EA	BAB1_0159	22.3147	22.9478	22.661	22.6956	22.5829	22.4838	6	23.0076	23.5097	23.1389	23.2535	23.1983	23.3207	6	+	+	282.72	477650000	184	3.63893	-0.623843	0.000229652
763	Q2YP15	OstA-like protein	BAB1_0155	21.8381	23.2033	21.8697	22.7987	22.9923	22.855	6	23.0769	23.1298	22.9138	22.8252	23.2921	23.0995	6			245.26	370280000	143	1.02991	-0.463361	0.0933446
764	Q2YP18	Integration host factor subunit beta (IHF-beta)	ihfB himD BAB1_0152	22.5094	21.4966	20.8742	22.449	22.6913	21.8907	6	24.0625	24.3462	23.3821	23.6417	22.8287	23.7819	6	+	+	37.072	385150000	64	3.06961	-1.68865	0.000851905
765	Q2YP33	Ribonuclease PH (RNase PH) (EC 2.7.7.56) (tRNA nucleotidyltransferase)	rph BAB1_0172	20.3157	20.3564	20.5449	19.8329	20.6046	20.6659	6	21.202	NaN	20.5851	20.852	20.6674	21.0384	5			49.061	97287000	47	0.259159	0.794258	0.550606
766	Q2YP35	Protein GrpE (HSP-70 cofactor)	grpE BAB1_0170	23.9346	24.0798	23.8256	23.8647	23.8104	23.2691	6	24.7658	24.6802	24.9311	24.6385	24.5617	24.6978	6	+	+	323.31	1176300000	335	4.61779	-0.915175	2.41108e-05
767	Q2YP63	Aldehyde dehydrogenase (EC 1.2.1.3)	BAB1_0211	22.1329	23.348	22.9698	22.7966	22.6616	23.4081	6	24.2017	24.8295	23.7297	24.4762	24.2291	24.4797	6	+	+	281.92	1008900000	325	3.80535	-1.43819	0.00015655
768	Q2YP75	Uncharacterized protein	BAB1_0227	NaN	NaN	NaN	NaN	NaN	NaN	0	23.4206	22.9479	22.871	23.4893	22.9909	23.0467	6	+	+	97.665	154310000	56	15.3029	-9.91773	4.9782e-16
769	Q2YP89	ATP/GTP-binding site motif A (P-loop):Fumarylacetoacetate (FAA) hydrolase (EC 4.1.1.-)	BAB1_0247	NaN	NaN	NaN	NaN	NaN	NaN	0	26.1896	24.322	25.9598	25.9714	26.0285	25.5474	6	+	+	41.772	1430200000	32	12.0537	-12.4598	8.83598e-13
770	Q2YPE0	Uncharacterized protein	BAB1_0295	NaN	NaN	NaN	NaN	NaN	NaN	0	20.4561	20.3282	20.0124	20.1897	20.5863	20.5973	6	+	+	45.989	41864000	31	14.4044	-7.15166	3.94115e-15
771	Q2YPF3	Glucose-6-phosphate isomerase (GPI) (EC 5.3.1.9) (Phosphoglucose isomerase) (PGI) (Phosphohexose isomerase) (PHI)	pgi BAB1_0316	21.2187	19.0823	20.8867	19.7874	19.659	19.2737	6	19.3002	20.3201	19.9052	19.4357	19.2744	20.4416	6			65.681	66921000	29	0.199772	0.205112	0.631289
772	Q2YPH7	Uncharacterized protein	BAB1_0327	19.7302	NaN	18.5166	18.0897	17.8239	NaN	4	18.3476	18.6699	18.3469	18.4884	NaN	18.5813	5			3.4431	17524000	3	0.241015	-0.843949	0.574097
773	Q2YPK5	Invasion protein B homolog BAB1_0368	BAB1_0368	NaN	NaN	NaN	NaN	NaN	NaN	0	22.3135	21.8213	21.9795	21.7676	22.889	23.5607	6	+	+	7.904	117010000	21	10.6481	-9.17859	2.2484e-11
774	Q2YPK8	ATP/GTP-binding site motif A (P-loop):Saccharopine dehydrogenase (EC 1.1.1.-)	BAB1_0364	19.4571	18.3604	20.766	18.8351	18.8136	NaN	5	18.5746	NaN	18.4471	18.7506	18.48	18.8729	5			26.901	30601000	12	0.143668	0.517821	0.718343
775	Q2YPL1	Enoyl-CoA hydratase/isomerase (EC 4.2.1.17)	BAB1_0016	NaN	NaN	NaN	NaN	NaN	NaN	0	21.6063	21.1854	NaN	21.4822	20.4721	22.1024	5	+	+	27.737	52700000	14	3.22874	-6.79972	0.000590548
776	Q2YPM9	Nucleoid-associated protein BAB1_0030	BAB1_0030	21.9042	22.3827	21.7627	22.2516	21.9761	21.7607	6	22.9906	22.8761	22.8284	22.8233	22.6047	22.5341	6	+	+	33.678	281520000	100	3.92229	-0.769865	0.000119594
777	Q2YPR0	Uncharacterized protein	BAB1_0069	NaN	NaN	NaN	NaN	NaN	NaN	0	21.7849	20.9774	20.9864	21.0757	21.3808	20.1642	6	+	+	136.09	36886000	25	11.1628	-7.85158	6.87448e-12
778	Q2YPV0	Enolase (EC 4.2.1.11) (2-phospho-D-glycerate hydro-lyase) (2-phosphoglycerate dehydratase)	eno BAB1_1155	26.7979	27.8519	26.9181	27.5871	28.0824	27.8697	6	28.0256	28.0429	28.1454	28.1196	28.2161	27.6922	6	+		323.31	10783000000	1094	1.3227	-0.522442	0.0475668
779	Q2YPV5	Acetyltransferase component of pyruvate dehydrogenase complex (EC 2.3.1.12)	aceF BAB1_1150	23.3185	22.8843	23.7467	21.3796	21.4332	20.4815	6	21.6603	21.7027	21.2246	20.7735	21.1157	21.4468	6			188.44	266090000	84	0.867663	0.886738	0.135624
780	Q2YQ07	Threonine--tRNA ligase (EC 6.1.1.3) (Threonyl-tRNA synthetase) (ThrRS)	thrS BAB1_1093	20.1398	20.6371	20.4471	20.6115	20.2544	20.1893	6	20.079	19.6894	19.9518	19.7055	19.9802	19.9053	6	+	+	50.117	70040000	42	2.96922	0.494663	0.00107345
781	Q2YQ20	Cysteine synthase/cystathionine beta-synthase P-phosphate attachment site:Pyridoxal-5'-phosphate-dependent enzyme, beta family (EC 2.5.1.47)	BAB1_1073	22.1424	21.1059	22.2623	21.8905	20.1478	19.6866	6	22.2982	22.7122	21.7052	22.3425	22.3269	22.4117	6	+		323.31	279470000	77	1.39886	-1.09353	0.0399151
782	Q2YQ24	Molybdenum cofactor biosynthesis protein	BAB1_1069	21.0897	20.19	20.4945	20.8724	20.3207	19.8847	6	NaN	NaN	20.2627	NaN	19.9545	19.8991	3	+		62.311	62633000	23	1.50464	3.85096	0.0312869
783	Q2YQ36	RNA polymerase-binding transcription factor DksA	dksA BAB1_1056	20.0575	20.5184	20.0519	18.9354	19.7297	NaN	5	19.5319	NaN	20.1159	19.5151	NaN	NaN	3			7.1497	47910000	14	0.613232	2.28499	0.243651
784	Q2YQ47	Brucella melitensis biovar Abortus 2308 chromosome I, complete sequence, strain 2308	BAB1_1043	22.8719	21.8605	23.2111	22.5673	21.3444	20.9958	6	21.7427	22.1193	21.9471	21.9719	21.9769	22.1917	6			323.31	271800000	117	0.161313	0.150206	0.689742
785	Q2YQ61	Uncharacterized protein	BAB1_1029	NaN	NaN	NaN	NaN	NaN	NaN	0	23.5776	23.2888	23.252	23.6442	23.0735	23.1791	6	+	+	151.38	285790000	91	16.0078	-10.1259	9.82124e-17
786	Q2YQ92	Uncharacterized protein	BAB1_0993	19.7289	20.3442	20.0242	19.7956	NaN	20.0234	5	19.6555	19.7998	19.5088	19.7567	19.3766	19.2664	6			25.721	49020000	24	0.261266	-0.706237	0.547942
787	Q2YQ97	Short-chain dehydrogenase/reductase SDR:Glucose/ribitol dehydrogenase (EC 1.1.1.159)	BAB1_1634	21.9301	19.7707	21.2745	20.6604	20.4873	20.3275	6	NaN	19.8811	NaN	20.1233	20.1053	20.3766	4			71.964	87213000	46	1.10624	2.92404	0.0782996
788	Q2YQA1	Putrescine-binding periplasmic protein	BAB1_1628	24.1341	25.4957	24.2484	24.6201	25.1418	25.0794	6	25.4772	25.1837	25.9202	25.2751	25.5921	25.2112	6	+		323.31	1959200000	469	1.60556	-0.656666	0.0247993
789	Q2YQA8	Uncharacterized protein	BAB1_1610	NaN	NaN	NaN	20.3676	NaN	19.9034	2	21.8922	20.1945	NaN	21.018	NaN	20.3537	4			66.588	169080000	44	0.63656	-2.79457	0.230909
790	Q2YQB8	Periplasmic binding protein/LacI transcriptional regulator	BAB1_1648	17.9796	20.0726	20.3285	19.8685	19.5392	19.8955	6	24.7258	24.0897	25.579	24.4621	24.6363	24.5307	6	+	+	323.31	499180000	139	6.75997	-5.05663	1.73792e-07
791	Q2YQB9	Short-chain dehydrogenase/reductase SDR:Glucose/ribitol dehydrogenase	BAB1_1647	NaN	NaN	NaN	NaN	NaN	NaN	0	21.3707	21.3085	21.0107	21.5766	21.2492	21.9022	6	+	+	323.31	114050000	56	13.7875	-8.19298	1.63112e-14
792	Q2YQC2	OmpA-like transmembrane domain	omp31-1 BAB1_1639	NaN	NaN	NaN	NaN	NaN	NaN	0	21.3262	20.5188	21.4591	21.3039	21.6623	21.2855	6	+	+	102.29	57236000	34	12.6622	-8.04931	2.17685e-13
793	Q2YQD3	ATP-dependent DNA ligase	BAB1_1384	NaN	NaN	NaN	NaN	NaN	NaN	0	20.9742	20.7383	22.1043	21.0685	NaN	NaN	4	+	+	64.128	55157000	10	1.98001	-5.3409	0.010471
794	Q2YQE8	Calcium-binding EF-hand	BAB1_1355	NaN	NaN	20.6068	19.4585	18.4845	19.3325	4	21.431	21.4367	22.1001	22.2551	21.8327	21.6691	6	+	+	130.09	234820000	113	2.05852	-4.40376	0.00873941
795	Q2YQF2	Prokaryotic sulfate-/thiosulfate-binding protein:Bacterial extracellular solute-binding protein, family 1	BAB1_1351	25.9862	26.3658	25.7368	26.7529	26.5625	25.9991	6	26.5699	26.8231	25.9823	26.4069	27.0451	26.936	6			323.31	3845400000	462	0.948338	-0.393318	0.112632
796	Q2YQH7	ATP-dependent zinc metalloprotease FtsH (EC 3.4.24.-)	ftsH BAB1_1703	23.4885	22.2951	23.9383	22.6246	22.046	21.3952	6	21.6725	21.999	21.4498	21.6158	21.4055	21.4981	6	+		272	327170000	149	1.57612	1.02452	0.0265387
797	Q2YQI3	ATP/GTP-binding site motif A (P-loop):Amino acid-binding ACT:D-isomer specific 2-hydroxyacid dehydrogenase, catalytic domain (EC 1.1.1.95)	BAB1_1697	23.3207	21.0358	22.7289	21.3978	20.798	20.1505	6	19.9044	NaN	19.2846	19.6406	19.2711	20.0053	5	+		323.31	155880000	72	1.53984	3.01931	0.0288512
798	Q2YQJ9	3-hydroxyisobutyrate dehydrogenase (HIBADH) (EC 1.1.1.31)	BAB1_1334	22.3119	21.17	22.1478	22.2455	20.9833	21.2715	6	20.4531	21.3146	19.8816	NaN	NaN	20.2256	4	+		139.49	127490000	45	1.37578	3.63916	0.0420936
799	Q2YQN4	Aminotransferase, class I and II	BAB1_1397	23.4007	22.2626	23.6483	22.7323	21.988	22.1164	6	22.8092	23.0275	22.8675	23.0891	22.7724	22.8476	6			323.31	473800000	169	0.3162	-0.21081	0.482837
800	Q2YQP7	Enoyl-CoA hydratase/isomerase (EC 4.2.1.17)	BAB1_2185	21.5572	19.5852	21.4987	19.871	19.9591	NaN	5	NaN	NaN	NaN	NaN	NaN	NaN	0	+	+	43.343	83337000	31	3.14446	6.07019	0.000717035
801	Q2YQQ6	Glutelin:Lipoprotein YaeC family:NLPA lipoprotein	BAB1_2176	NaN	NaN	NaN	NaN	NaN	NaN	0	21.6888	21.9562	21.7607	21.9511	21.3998	21.7468	6	+	+	129.37	197420000	70	15.7061	-8.54056	1.96755e-16
802	Q2YQS2	S-adenosylmethionine synthase (EC 2.5.1.6)	BAB1_2160	22.6038	23.3968	22.5201	22.8099	22.9165	23.2327	6	22.5713	22.8496	22.657	22.6377	22.1742	22.039	6	+		291.52	404810000	148	1.30599	0.425142	0.0494319
803	Q2YQT2	Ferritin:DNA-binding protein Dps	BAB1_2150	28.1517	29.9383	28.0323	29.335	29.1257	29.5501	6	28.3335	27.9056	26.7655	26.128	26.3623	25.8197	6	+	+	323.31	16635000000	870	2.67679	2.13644	0.00210481
804	Q2YQT3	Thermophilic metalloprotease (M29) (EC 3.4.11.-)	pepS BAB1_2149	22.4881	21.2518	22.1659	22.2957	21.3899	20.5933	6	21.1909	21.1034	21.3527	21.6874	21.4829	21.3034	6			171.56	161660000	62	0.527122	0.344047	0.297083
805	Q2YQX8	Adenosylhomocysteinase (EC 3.3.1.1) (S-adenosyl-L-homocysteine hydrolase) (AdoHcyase)	ahcY BAB1_2099	23.1587	22.4371	23.8012	23.1953	22.3798	22.0452	6	23.0121	23.2585	22.9776	22.7936	23.0948	22.9741	6			282.51	724090000	295	0.281374	-0.182218	0.52315
806	Q2YQZ0	Imidazole glycerol phosphate synthase subunit HisH (EC 2.4.2.-) (IGP synthase glutamine amidotransferase subunit) (IGP synthase subunit HisH) (ImGP synthase subunit HisH) (IGPS subunit HisH)	hisH BAB1_2084	NaN	NaN	NaN	NaN	NaN	NaN	0	21.2529	20.7072	21.0796	21.0856	21.1077	20.8718	6	+	+	42.688	66571000	30	15.5327	-7.80748	2.93266e-16
807	Q2YQZ9	Calcium-binding EF-hand	BAB1_2075	NaN	NaN	NaN	NaN	NaN	NaN	0	NaN	17.8402	17.8423	17.7686	NaN	17.8724	4	+	+	63.464	15497000	16	1.9946	-3.0806	0.0101251
808	Q2YR20	Uncharacterized protein	BAB1_2054	22.8484	23.9271	22.9122	23.45	23.3013	23.565	6	23.7027	23.6854	23.859	23.3565	23.4809	23.2571	6			323.31	919900000	296	0.566982	-0.222919	0.271031
809	Q2YR45	Basic helix-loop-helix dimerization domain bHLH:BolA-like protein	bolA BAB1_2027	NaN	NaN	NaN	NaN	NaN	NaN	0	NaN	20.1255	20.8853	20.0722	20.0493	20.2091	5	+	+	33.997	62675000	31	3.25097	-5.8819	0.00056109
810	Q2YR84	Brucella melitensis biovar Abortus 2308 chromosome I, complete sequence, strain 2308	BAB1_1985	NaN	NaN	NaN	NaN	NaN	NaN	0	17.4144	17.7724	17.9502	17.7174	18.012	18.0032	6	+	+	13.102	10064000	14	12.5212	-4.60161	3.01132e-13
811	Q2YR97	Electron transfer flavoprotein beta-subunit	etfB BAB1_1972	24.0777	23.2016	23.8013	23.5006	23.1957	22.6348	6	23.3737	23.3262	23.1402	23.269	23.1476	23.1536	6			323.31	664490000	221	0.34728	0.166904	0.44949
812	Q2YR99	3-hydroxyacyl-CoA dehydrogenase, C-terminal:3-hydroxyacyl-CoA dehydrogenase, NAD binding domain:3-hydroxyacyl-CoA dehydrogenase (EC 1.1.1.157)	BAB1_1970	21.3362	19.9981	21.5722	20.3044	NaN	NaN	4	20.839	20.1528	20.5397	20.8898	20.9812	21.4421	6			29.423	112070000	34	0.822271	-2.53561	0.150567
813	Q2YRA9	30S ribosomal protein S8	rpsH BAB1_1241	22.1406	22.5123	21.305	21.7385	21.7975	21.9591	6	NaN	22.3913	23.1361	22.5681	21.8998	22.3921	5			110.71	246790000	53	0.262739	0.975912	0.546086
814	Q2YRE1	Transketolase (EC 2.2.1.1)	tkt BAB1_1740	24.5231	23.146	24.837	24.025	23.693	23.5545	6	23.8794	23.9512	23.8439	23.9077	24.0355	24.0292	6			323.31	1179600000	312	0.0295115	0.0219326	0.934305
815	Q2YRH4	Brucella melitensis biovar Abortus 2308 chromosome I, complete sequence, strain 2308	BAB1_1676	NaN	NaN	NaN	NaN	NaN	NaN	0	20.3784	19.6806	20.7476	20.1749	20.3106	20.2917	6	+	+	63.431	30253000	13	12.6027	-7.05394	2.49638e-13
816	Q2YRK5	Malate synthase G (EC 2.3.3.9)	glcB BAB1_1663	23.4737	23.3357	23.7974	23.4202	22.8454	22.9582	6	20.7848	21.494	20.7917	21.1793	21.1999	21.2675	6	+	+	164.1	389790000	152	6.50762	2.18556	3.1073e-07
817	Q2YRM0	Cold-shock DNA-binding domain	BAB1_1532	25.088	25.4221	24.7873	26.1049	25.9588	26.0135	6	25.6159	26.1042	25.6343	25.4648	25.6885	25.402	6			90.862	3051300000	113	0.140441	-0.0892076	0.723701
818	Q2YRM8	Cold-shock DNA-binding domain	BAB1_1512	20.2347	20.1418	19.7626	NaN	NaN	NaN	3	22.2743	NaN	21.7525	21.4931	21.6784	21.4104	5			9.093	118010000	19	0.961697	-3.67491	0.10922
819	Q2YRN2	Carbamoyl-phosphate synthase large chain (EC 6.3.5.5) (Carbamoyl-phosphate synthetase ammonia chain)	carB BAB1_1508	23.0309	22.1837	22.8449	22.569	20.9616	20.5406	6	19.8086	19.9833	19.3905	20.1206	20.192	19.902	6	+	+	88.467	280920000	91	3.17193	2.1223	0.000673091
820	Q2YRN8	Transcription elongation factor GreA (Transcript cleavage factor GreA)	greA BAB1_1523	22.89	24.2084	22.9375	23.3977	23.7582	23.5444	6	24.6326	24.3122	24.6891	24.301	24.3967	23.6889	6	+	+	190.76	965080000	223	2.24548	-0.880739	0.00568228
821	Q2YRP7	Ribosome-recycling factor (RRF) (Ribosome-releasing factor)	frr BAB1_1181	26.2454	26.6068	26.2608	26.578	26.4629	26.191	6	24.0092	24.276	24.4602	24.1815	24.0372	23.8588	6	+	+	323.31	3781800000	560	8.59498	2.25369	2.54107e-09
822	Q2YRR5	Anthranilate phosphoribosyltransferase (EC 2.4.2.18)	trpD BAB1_1163	20.7085	19.8194	21.0831	20.714	19.5249	18.9554	6	19.0651	19.1429	19.122	19.1607	19.0346	19.1876	6	+	+	22.246	60202000	20	1.87261	1.01539	0.0134088
823	Q2YRR6	Peptidyl-prolyl cis-trans isomerase D (EC 5.2.1.8)	BAB1_1162	NaN	NaN	18.9984	18.3261	NaN	NaN	2	20.4519	19.9038	19.9893	19.8857	20.3668	19.8466	6	+	+	113.88	39738000	18	2.84657	-5.04659	0.00142373
824	Q2YRT1	2-isopropylmalate synthase (EC 2.3.3.13) (Alpha-IPM synthase) (Alpha-isopropylmalate synthase)	leuA BAB1_1583	20.402	19.0957	19.5735	20.0226	NaN	NaN	4	21.1198	20.1546	21.0797	20.7736	20.7238	21.2238	6	+		182.7	86818000	50	1.37	-3.26029	0.0426576
825	Q2YRU5	MotY protein:Bacterial outer membrane protein:OmpA/MotB domain	BAB1_1226	22.2572	22.2109	21.6358	21.829	21.8298	21.4273	6	20.8597	20.8345	20.5963	20.4069	20.3771	20.5558	6	+	+	264.05	151780000	64	4.96195	1.25995	1.09158e-05
826	Q2YRV2	Uncharacterized protein	BAB1_1219	21.327	23.1738	23.4333	23.5751	23.4416	24.1818	6	23.209	22.2899	22.9485	21.5265	23.2823	23.6081	6			51.98	571670000	61	0.325837	0.37802	0.47224
827	Q2YRY0	Substrate-binding region of ABC-type glycine betaine transport system	BAB1_1593	23.7683	24.146	24.0973	23.9595	23.7062	23.7332	6	24.4848	24.4427	24.5863	24.2118	24.3109	24.5743	6	+	+	323.31	1125800000	327	3.50343	-0.533375	0.000313743
828	Q2YRZ0	Uncharacterized protein	BAB1_1756	20.2467	20.6133	NaN	NaN	21.0282	21.9017	4	20.318	NaN	NaN	NaN	19.9902	NaN	2			16.826	85057000	49	0.64596	2.8436	0.225964

## Sheet: Significant (t-test and FDR)
Supplementary Table 1B: List of Proteins identified: S.No, Uniprot ID (as obtained from the database: uniprot.org), protein name/description (as in the database), Gene name, Log2 normalised label free quantification intensities (quantification, NaN-not a number for those values lower thanthe dedection level, Expt-individual culture and measurement), Score (Andromeda score for the best associated …
S.No	Uniprot ID	Protein name/ Description	Gene name	Log2 normalised label free quantification intensities														Score	Intensity	MS/MS Count	T-test Significant	False Discovery Rate (FDR)	t-test Difference	t-test p value
				B. melitensis 09RB5232 (M)							B. abortus 09RB5689 (A)
				Expt. 1	Expt. 2	Expt. 3	Expt. 4	Expt. 5	Expt. 6	Count	Expt. 7	Expt. 8	Expt. 9	Expt. 10	Expt. 11	Expt. 12	Count
1	Q2YP89	ATP/GTP-binding site motif A (P-loop):Fumarylacetoacetate (FAA) hydrolase (EC 4.1.1.-)	BAB1_0247	NaN	NaN	NaN	NaN	NaN	NaN	0	26.1896	24.322	25.9598	25.9714	26.0285	25.5474	6	41.772	1430200000	32	+	+	-12.4598	8.83598e-13
2	Q2YKI4	Ferroxidase (EC 1.16.3.1)	bfr BAB2_0675	NaN	NaN	NaN	NaN	NaN	NaN	0	25.6926	24.5034	25.4575	25.41	25.4958	25.1753	6	61.898	730990000	73	+	+	-12.0791	7.95406e-15
3	F2HUP5	Formate/nitrite transporter	BM28_A0112	NaN	NaN	NaN	NaN	NaN	NaN	0	24.6844	23.9086	25.0128	25.0503	25.2196	24.7533	6	180.55	682540000	122	+	+	-11.5615	3.59567e-14
4	F2HX75	Zinc protease	BM28_B0201	NaN	NaN	NaN	NaN	NaN	NaN	0	24.8379	24.6959	24.5413	24.5311	24.6904	24.4679	6	215.77	592660000	176	+	+	-11.4174	2.0925e-19
5	Q2YIL8	Urocanate hydratase (Urocanase) (EC 4.2.1.49) (Imidazolonepropionate hydrolase)	hutU BAB2_0303	NaN	NaN	NaN	NaN	NaN	NaN	0	24.1446	24.4797	24.5919	24.6669	24.6259	24.2453	6	279.2	686180000	164	+	+	-11.2491	2.16917e-17
6	Q2YK12	Uncharacterized protein	BAB2_0868	NaN	NaN	NaN	NaN	NaN	NaN	0	24.1381	24.1399	24.0508	23.9408	23.8277	24.1178	6	157.42	311890000	81	+	+	-10.8259	1.55413e-19
7	Q2YPS1	Esterase/lipase/thioesterase, active site	BAB1_0058	NaN	NaN	NaN	NaN	NaN	NaN	0	23.9694	24.0513	23.9462	24.1696	23.9738	23.7524	6	248.48	296270000	78	+	+	-10.7671	3.56358e-19
8	Q2YMC0	Uncharacterized protein	BAB1_0418	NaN	19.2448	NaN	18.5084	NaN	NaN	2	25.704	25.408	25.8565	25.6107	25.6956	25.3051	6	219.93	858170000	94	+	+	-10.4978	5.38923e-06
9	Q2YQ61	Uncharacterized protein	BAB1_1029	NaN	NaN	NaN	NaN	NaN	NaN	0	23.5776	23.2888	23.252	23.6442	23.0735	23.1791	6	151.38	285790000	91	+	+	-10.1259	9.82124e-17
10	F2HXT1	Leu/Ile/Val-binding protein family	BM28_B1178	18.9221	NaN	16.1432	NaN	NaN	NaN	2	24.5707	24.7253	24.3207	24.7567	24.74	24.901	6	323.31	1122500000	373	+	+	-10.0182	1.33287e-06
11	Q2YP75	Uncharacterized protein	BAB1_0227	NaN	NaN	NaN	NaN	NaN	NaN	0	23.4206	22.9479	22.871	23.4893	22.9909	23.0467	6	97.665	154310000	56	+	+	-9.91773	4.9782e-16
12	Q2YLN5	Ubiquinone biosynthesis O-methyltransferase (2-polyprenyl-6-hydroxyphenol methylase) (EC 2.1.1.222) (3-demethylubiquinone 3-O-methyltransferase) (EC 2.1.1.64)	ubiG BAB1_1875	16.172	NaN	17.8558	15.6276	NaN	NaN	3	24.6897	24.692	24.3916	24.5582	24.3742	25.1031	6	323.31	849090000	225	+	+	-9.75391	2.9132e-07
13	Q2YKP4	Solute-binding protein/glutamate receptor:Ionotropic glutamate receptor:Bacterial extracellular solute-binding protein, family 3	BAB2_0612	NaN	NaN	NaN	NaN	NaN	NaN	0	22.3161	22.3338	22.41	22.3701	22.5368	22.5378	6	217.77	187840000	88	+	+	-9.20744	6.05961e-20
14	Q2YPK5	Invasion protein B homolog BAB1_0368	BAB1_0368	NaN	NaN	NaN	NaN	NaN	NaN	0	22.3135	21.8213	21.9795	21.7676	22.889	23.5607	6	7.904	117010000	21	+	+	-9.17859	2.2484e-11
15	Q2YNJ4	Uncharacterized protein	BAB1_0863	NaN	NaN	NaN	NaN	NaN	NaN	0	22.6842	21.1097	22.7121	22.6457	22.9269	21.9629	6	24.691	138320000	30	+	+	-9.13026	1.72939e-11
16	F2HZQ1	Imidazolonepropionase (EC 3.5.2.7)	hutI BM28_B0897	NaN	NaN	NaN	NaN	NaN	NaN	0	21.7278	22.3357	22.2616	22.1465	22.0961	22.2078	6	115.31	121040000	59	+	+	-8.91927	1.98803e-16
17	Q2YQG1	Bacterial transferase hexapeptide repeat	BAB1_1279	NaN	NaN	NaN	NaN	NaN	NaN	0	21.0845	22.1669	22.4484	22.8763	22.5359	21.3548	6	73.44	158310000	52	+	+	-8.8678	3.14723e-11
18	Q2YKW2	Alkyl hydroperoxide reductase AhpD (EC 1.11.1.15) (Alkylhydroperoxidase AhpD)	ahpD BAB2_0532	NaN	NaN	NaN	NaN	NaN	NaN	0	22.3778	21.724	21.4622	22.0895	21.5886	22.9014	6	323.31	229880000	106	+	+	-8.81391	2.59108e-12
19	Q2YJ21	Dihydroxy-acid and 6-phosphogluconate dehydratase:ATP/GTP-binding site motif A (P-loop) (EC 4.2.1.6)	BAB2_0294	NaN	NaN	NaN	NaN	NaN	NaN	0	21.5329	22.0065	21.8441	21.4756	21.7296	21.965	6	302.83	186540000	93	+	+	-8.54893	4.1164e-16
20	Q2YQQ6	Glutelin:Lipoprotein YaeC family:NLPA lipoprotein	BAB1_2176	NaN	NaN	NaN	NaN	NaN	NaN	0	21.6888	21.9562	21.7607	21.9511	21.3998	21.7468	6	129.37	197420000	70	+	+	-8.54056	1.96755e-16
21	Q2YJU8	Multicopper oxidase, type 1:Copper-containing nitrite reductase:Twin-arginine translocation pathway signal (EC 1.7.2.1)	BAB2_0943	NaN	NaN	NaN	NaN	NaN	NaN	0	22.3427	19.9815	23.6829	21.3449	22.5661	20.5489	6	181.62	307340000	60	+	+	-8.5345	3.12548e-08
22	Q2YKW3	Alkyl hydroperoxide reductase/ Thiol specific antioxidant/ Mal allergen (EC 1.8.1.-)	ahpC BAB2_0531	NaN	NaN	NaN	NaN	NaN	NaN	0	21.9576	21.6492	21.8033	21.3059	21.7593	21.8118	6	61.112	101470000	43	+	+	-8.5045	4.93373e-16
23	Q2YJW2	Nitrous-oxide reductase (EC 1.7.2.4) (N(2)OR) (N2O reductase)	nosZ BAB2_0928	NaN	NaN	NaN	NaN	NaN	NaN	0	22.2562	20.1039	22.9851	20.6412	22.1287	20.4179	6	113.64	201660000	106	+	+	-8.21218	1.0395e-08
24	Q2YQB9	Short-chain dehydrogenase/reductase SDR:Glucose/ribitol dehydrogenase	BAB1_1647	NaN	NaN	NaN	NaN	NaN	NaN	0	21.3707	21.3085	21.0107	21.5766	21.2492	21.9022	6	323.31	114050000	56	+	+	-8.19298	1.63112e-14
25	F2HWC2	Dihydroxyacetone kinase subunit L	BM28_A1631	NaN	NaN	18.9443	NaN	NaN	NaN	1	22.4126	22.3895	22.5998	21.6687	22.1664	22.3705	6	223.93	114940000	51	+	+	-8.10221	7.6814e-06
26	Q2YQC2	OmpA-like transmembrane domain	omp31-1 BAB1_1639	NaN	NaN	NaN	NaN	NaN	NaN	0	21.3262	20.5188	21.4591	21.3039	21.6623	21.2855	6	102.29	57236000	34	+	+	-8.04931	2.17685e-13
27	Q2YMR6	Superoxide dismutase (EC 1.15.1.1)	BAB1_0591	23.9036	NaN	NaN	NaN	NaN	23.7459	2	24.7789	24.495	24.7767	24.494	24.7581	24.7598	6	138.28	1059500000	82	+	+	-7.92881	0.00534057
28	Q2YPR0	Uncharacterized protein	BAB1_0069	NaN	NaN	NaN	NaN	NaN	NaN	0	21.7849	20.9774	20.9864	21.0757	21.3808	20.1642	6	136.09	36886000	25	+	+	-7.85158	6.87448e-12
29	Q2YQZ0	Imidazole glycerol phosphate synthase subunit HisH (EC 2.4.2.-) (IGP synthase glutamine amidotransferase subunit) (IGP synthase subunit HisH) (ImGP synthase subunit HisH) (IGPS subunit HisH)	hisH BAB1_2084	NaN	NaN	NaN	NaN	NaN	NaN	0	21.2529	20.7072	21.0796	21.0856	21.1077	20.8718	6	42.688	66571000	30	+	+	-7.80748	2.93266e-16
30	F2HRA2	Glutathione reductase	BM28_A1021	18.0637	NaN	18.8958	18.5389	17.526	NaN	4	24.5601	24.7908	24.4147	24.3834	24.2797	23.7513	6	259.51	373520000	114	+	+	-7.78929	3.10915e-05
31	Q2YIL6	Histidine ammonia-lyase (Histidase) (EC 4.3.1.3)	hutH BAB2_0305	NaN	NaN	NaN	NaN	NaN	NaN	0	20.6113	21.1031	21.1981	20.989	20.7949	20.9889	6	53.828	56317000	28	+	+	-7.73755	7.85872e-16
32	Q2YJ23	Sugar transporter	BAB2_0292	NaN	NaN	NaN	NaN	NaN	NaN	0	20.6224	21.1387	20.6907	20.7234	20.6937	20.5536	6	13.9	69402000	16	+	+	-7.52709	7.44869e-16
33	Q2YJ22	Oxidoreductase, N-terminal:Oxidoreductase, C-terminal (EC 1.1.1.48)	BAB2_0293	NaN	NaN	NaN	18.4902	NaN	NaN	1	21.804	21.4632	21.1636	21.1248	21.4147	21.5467	6	62.011	123430000	30	+	+	-7.32945	8.77462e-06
34	Q2YLF3	4-hydroxyproline epimerase (EC 5.1.1.8) (Hydroxyproline-2-epimerase) (HyPRE)	prpA BAB1_1800	NaN	NaN	NaN	NaN	NaN	NaN	0	20.5604	20.0726	20.5387	20.4976	20.4154	20.3846	6	93.246	122540000	42	+	+	-7.20154	2.93627e-16
35	Q2YPE0	Uncharacterized protein	BAB1_0295	NaN	NaN	NaN	NaN	NaN	NaN	0	20.4561	20.3282	20.0124	20.1897	20.5863	20.5973	6	45.989	41864000	31	+	+	-7.15166	3.94115e-15
36	Q2YRH4	Brucella melitensis biovar Abortus 2308 chromosome I, complete sequence, strain 2308	BAB1_1676	NaN	NaN	NaN	NaN	NaN	NaN	0	20.3784	19.6806	20.7476	20.1749	20.3106	20.2917	6	63.431	30253000	13	+	+	-7.05394	2.49638e-13
37	Q2YKG3	Uncharacterized protein	BAB2_0697	NaN	NaN	17.4402	NaN	NaN	NaN	1	19.9093	22.5778	21.5974	20.0293	21.9537	19.7201	6	4.1976	63546000	20	+	+	-7.04956	9.97399e-06
38	Q2YPL1	Enoyl-CoA hydratase/isomerase (EC 4.2.1.17)	BAB1_0016	NaN	NaN	NaN	NaN	NaN	NaN	0	21.6063	21.1854	NaN	21.4822	20.4721	22.1024	5	27.737	52700000	14	+	+	-6.79972	0.000590548
39	Q2YIG4	ATP/GTP-binding site motif A (P-loop):Ornithine cyclodeaminase/mu-crystallin (EC 4.3.1.12)	BAB2_0338	NaN	NaN	NaN	NaN	NaN	NaN	0	19.8683	19.5938	19.8015	19.9317	20.3204	20.5168	6	91.209	44354000	26	+	+	-6.79542	3.55458e-13
40	Q2YJ35	Putative nickel-responsive regulator	BAB2_0432	NaN	NaN	NaN	NaN	NaN	NaN	0	19.5859	19.749	19.6703	19.5344	19.5632	19.5745	6	3.9483	23249000	6	+	+	-6.40289	3.25122e-19
41	Q2YIG5	Arginase (EC 3.5.3.1)	rocF BAB2_0337	18.6407	NaN	18.8633	NaN	NaN	NaN	2	21.559	21.5878	20.5409	21.3789	21.4531	21.5278	6	146.12	103160000	50	+	+	-6.28394	0.000335211
42	F2HWC3	Dihydroxyacetone kinase	BM28_A1632	19.012	NaN	19.5427	19.0749	NaN	NaN	3	22.281	22.4771	22.2388	22.4769	22.3902	22.5273	6	304.92	226420000	76	+	+	-6.18862	0.00097599
43	Q2YKR4	Renal dipeptidase (EC 3.4.13.19)	BAB2_0586	NaN	NaN	NaN	NaN	NaN	NaN	0	19.1108	19.5872	19.2989	19.1875	19.4753	19.2432	6	8.4894	22253000	14	+	+	-6.10715	1.6091e-15
44	Q2YN28	Uncharacterized protein	BAB1_0691	NaN	NaN	NaN	NaN	NaN	NaN	0	19.0964	19.0849	19.4171	19.2906	19.1449	19.1812	6	5.2052	15727000	8	+	+	-5.99249	6.52817e-17
45	Q2YR45	Basic helix-loop-helix dimerization domain bHLH:BolA-like protein	bolA BAB1_2027	NaN	NaN	NaN	NaN	NaN	NaN	0	NaN	20.1255	20.8853	20.0722	20.0493	20.2091	5	33.997	62675000	31	+	+	-5.8819	0.00056109
46	Q2YQJ7	Uncharacterized protein	BAB1_1336	NaN	21.007	21.0143	NaN	21.9745	22.4893	4	24.6096	24.635	24.7973	24.0741	25.0429	24.5436	6	50.966	1238500000	64	+	+	-5.79954	0.00895822
47	Q2YNW1	Prokaryotic sulfate-/thiosulfate-binding protein:Bacterial extracellular solute-binding protein, family 1	BAB1_0104	22.1746	22.7524	22.7961	22.2837	22.1989	19.9226	6	27.9181	27.2515	27.7476	27.8946	27.7775	27.7653	6	323.31	5834700000	443	+	+	-5.70441	1.589e-07
48	Q2YNE3	Proline--tRNA ligase (EC 6.1.1.15) (Prolyl-tRNA synthetase) (ProRS)	proS BAB1_0842	NaN	NaN	NaN	NaN	NaN	NaN	0	NaN	19.9555	20.3243	20.09	19.7628	20.0771	5	7.5547	27164000	19	+	+	-5.69327	0.000545967
49	Q2YJ19	KDPG and KHG aldolase (EC 4.1.2.21)	BAB2_0296	18.6554	NaN	19.0699	19.1597	NaN	NaN	3	21.7572	21.3571	21.9663	21.3888	22.0216	21.7545	6	130.37	158920000	52	+	+	-5.62176	0.00144908
50	Q2YMZ2	Antifreeze protein, type I	BAB1_0655	NaN	NaN	NaN	NaN	NaN	NaN	0	19.7831	19.3249	20.311	NaN	19.7332	19.9375	5	17.218	19709000	16	+	+	-5.50662	0.000565492
51	Q2YQD3	ATP-dependent DNA ligase	BAB1_1384	NaN	NaN	NaN	NaN	NaN	NaN	0	20.9742	20.7383	22.1043	21.0685	NaN	NaN	4	64.128	55157000	10	+	+	-5.3409	0.010471
52	Q2YKX9	Glycine dehydrogenase (decarboxylating) (EC 1.4.4.2) (Glycine cleavage system P-protein) (Glycine decarboxylase) (Glycine dehydrogenase (aminomethyl-transferring))	gcvP BAB2_0515	19.294	18.4826	19.0294	NaN	18.8893	NaN	4	21.7817	22.172	22.8133	22.4435	22.0722	22.2566	6	170.28	190420000	90	+	+	-5.23735	0.00155915
53	Q2YQB8	Periplasmic binding protein/LacI transcriptional regulator	BAB1_1648	17.9796	20.0726	20.3285	19.8685	19.5392	19.8955	6	24.7258	24.0897	25.579	24.4621	24.6363	24.5307	6	323.31	499180000	139	+	+	-5.05663	1.73792e-07
54	Q2YRR6	Peptidyl-prolyl cis-trans isomerase D (EC 5.2.1.8)	BAB1_1162	NaN	NaN	18.9984	18.3261	NaN	NaN	2	20.4519	19.9038	19.9893	19.8857	20.3668	19.8466	6	113.88	39738000	18	+	+	-5.04659	0.00142373
55	F2HTF1	Uncharacterized protein	BM28_A1301	18.2617	19.3567	NaN	NaN	NaN	19.994	3	21.0976	21.5059	21.1166	20.9511	20.9541	21.2512	6	129.73	69456000	46	+	+	-4.93902	0.00464014
56	Q2YN33	OmpA-like transmembrane domain	BAB1_0722	NaN	NaN	NaN	NaN	NaN	NaN	0	20.4003	21.0104	20.6356	NaN	20.3612	NaN	4	2.7237	34426000	12	+	+	-4.92792	0.0102193
57	Q2YJH5	High-affinity zinc uptake system protein ZnuA	znuA BAB2_1079	NaN	17.2511	17.237	NaN	NaN	NaN	2	19.1111	19.6618	18.5204	18.6458	19.8178	20.3788	6	18.484	15542000	12	+	+	-4.80126	0.00033142
58	F2HQD9	Glycine betaine ABC transporter substrate-binding protein	BM28_A0236	18.5096	19.5203	19.7746	19.2384	18.8932	17.8435	6	24.231	24.0482	24.0459	23.5007	23.5326	23.1933	6	323.31	280120000	82	+	+	-4.79533	5.23694e-08
59	Q2YM83	Cytochrome c heme-binding site:Cytochrome C oxidase, mono-heme subunit/FixO (EC 1.9.3.1)	ccoO BAB1_0391	NaN	NaN	NaN	NaN	NaN	NaN	0	18.9299	NaN	18.9983	18.895	18.9413	18.9283	5	17.749	14336000	6	+	+	-4.7738	0.000537743
60	Q2YJS1	DNA gyrase, subunit B:Short-chain dehydrogenase/reductase SDR:Glucose/ribitol dehydrogenase	BAB2_0975	19.5208	NaN	19.7573	19.0278	NaN	NaN	3	20.992	21.1153	20.7604	21.3033	20.6502	21.5959	6	156.65	156380000	61	+	+	-4.74686	0.00695216
61	Q2YLL8	50S ribosomal protein L27	rpmA BAB1_1857	NaN	NaN	NaN	16.9652	NaN	NaN	1	17.8504	17.6641	19.0417	20.2061	18.2354	17.8122	6	89.687	30055000	16	+	+	-4.63244	9.81934e-05
62	Q2YS13	Antifreeze protein, type I	BAB1_1495	20.6932	19.8338	NaN	20.9224	21.5871	21.2083	5	22.0434	24.2688	24.9422	25.3775	24.0618	24.3915	6	6.9677	487810000	35	+	+	-4.60506	0.00748271
63	Q2YR84	Brucella melitensis biovar Abortus 2308 chromosome I, complete sequence, strain 2308	BAB1_1985	NaN	NaN	NaN	NaN	NaN	NaN	0	17.4144	17.7724	17.9502	17.7174	18.012	18.0032	6	13.102	10064000	14	+	+	-4.60161	3.01132e-13
64	Q2YJ16	Aldehyde dehydrogenase (EC 1.2.1.-)	BAB2_0327	20.3278	19.3357	20.0803	19.0549	18.9549	18.4884	6	23.7317	24.4483	23.5603	23.9728	23.5252	23.817	6	323.31	1049400000	177	+	+	-4.46889	6.69195e-08
65	Q2YQE8	Calcium-binding EF-hand	BAB1_1355	NaN	NaN	20.6068	19.4585	18.4845	19.3325	4	21.431	21.4367	22.1001	22.2551	21.8327	21.6691	6	130.09	234820000	113	+	+	-4.40376	0.00873941
66	F2HZF8	Adenine nucleotide translocator 1	BM28_B0011	NaN	NaN	NaN	NaN	NaN	NaN	0	18.2593	18.2348	18.4087	NaN	18.3043	17.9244	5	3.7854	9411300	12	+	+	-4.18024	0.00054986
67	Q2YLS7	Dihydrolipoyl dehydrogenase (EC 1.8.1.4)	lpdA-2 BAB1_1918	23.9876	23.7272	24.1975	23.3632	23.4166	22.908	6	27.3062	27.2967	27.8691	28.0206	27.7638	27.6617	6	323.31	4211600000	664	+	+	-4.05298	6.23894e-09
68	F2HRI2	Uncharacterized protein	BM28_A1804	NaN	NaN	18.8943	NaN	NaN	NaN	1	19.3658	18.6871	19.8785	18.7661	NaN	18.9754	5	5.4819	23872000	14	+	+	-3.98976	0.0160847
69	F2HVY7	Extracellular solute-binding protein	BM28_A0870	18.4726	NaN	NaN	18.64	NaN	19.7363	3	19.3861	20.7974	20.4833	20.2091	20.041	19.494	6	89.827	28986000	15	+	+	-3.98865	0.0126083
70	Q2YMD8	Uncharacterized protein	BAB1_0437	NaN	NaN	NaN	NaN	NaN	NaN	0	19.016	NaN	18.8479	18.9564	NaN	18.8927	4	31.345	17404000	19	+	+	-3.81217	0.0101297
71	F2HX63	Uncharacterized protein	BM28_B0189	18.0283	18.6254	17.4631	18.28	19.5508	20.5688	6	22.6003	22.0487	22.728	22.4507	22.809	22.1901	6	169.64	126390000	74	+	+	-3.71842	1.46824e-05
72	Q2YIK0	Sulfoxide reductase catalytic subunit YedY (EC 1.8.-.-)	yedY BAB2_0243	20.144	20.6446	19.5626	19.4761	20.2813	NaN	5	22.9286	22.7217	22.8309	22.6332	22.5559	21.8936	6	91.02	201530000	100	+	+	-3.70756	0.00952458
73	F2HTM4	Imidazole glycerol phosphate synthase subunit HisF (EC 4.1.3.-) (IGP synthase cyclase subunit) (IGP synthase subunit HisF) (ImGP synthase subunit HisF)	hisF BM28_A2072	18.707	NaN	18.3387	18.6299	NaN	NaN	3	19.3689	19.2554	19.3153	19.6291	19.8283	19.4703	6	7.0208	35144000	17	+	+	-3.59362	0.013481
74	F2HXV9	Family 1 extracellular solute-binding protein	BM28_B0298	18.1017	18.187	17.4191	18.155	NaN	NaN	4	19.9334	19.7555	19.9918	19.5519	19.9947	19.9766	6	68.539	46117000	46	+	+	-3.48683	0.0062696
75	Q2YQ44	Uncharacterized protein	BAB1_1048	18.4742	18.0065	19.1676	19.2563	NaN	NaN	4	19.5959	21.6732	20.0691	20.5927	19.6349	20.3847	6	13.639	39824000	17	+	+	-3.43763	0.0181747
76	Q2YQP2	Putative fluoride ion transporter CrcB	crcB BAB1_1389	17.8607	17.876	18.4488	17.7073	NaN	NaN	4	20.2295	20.6318	19.866	19.7499	18.8628	19.1268	6	6.8899	22758000	12	+	+	-3.359	0.00926736
77	Q2YIN7	Molybdenum ABC transporter, periplasmic binding protein	modA BAB2_0087	21.254	22.0389	20.4607	21.9508	22.3815	23.474	6	25.1993	24.8185	25.0196	25.0395	25.1991	25.1573	6	323.31	1023100000	222	+	+	-3.14558	2.14137e-05
78	Q2YQZ9	Calcium-binding EF-hand	BAB1_2075	NaN	NaN	NaN	NaN	NaN	NaN	0	NaN	17.8402	17.8423	17.7686	NaN	17.8724	4	63.464	15497000	16	+	+	-3.0806	0.0101251
79	Q2YPZ4	Acyl-CoA dehydrogenase:Acyl-CoA dehydrogenase, C-terminal:Acyl-CoA dehydrogenase, central domain:Acyl-CoA dehydrogenase, N-te (EC 1.3.99.7)	BAB1_1109	21.6096	19.9269	21.7116	20.8107	19.9936	19.6947	6	23.5653	23.4429	23.251	23.9586	23.6697	23.9986	6	323.31	938810000	209	+	+	-3.02319	1.27462e-05
80	Q2YKL5	UPF0173 metal-dependent hydrolase BAB2_0644	BAB2_0644	24.9111	26.5265	24.7782	25.6598	26.3501	26.6186	6	28.9203	28.4117	28.8524	28.7002	28.8795	28.684	6	323.31	9384000000	523	+	+	-2.93397	6.53578e-06
81	F2HZT8	Lipoprotein	BM28_B0934	23.0874	23.9338	23.0714	23.5877	23.7272	23.9091	6	26.5273	26.3492	26.5203	26.374	26.3587	26.1615	6	323.31	2718100000	449	+	+	-2.82905	1.11853e-08
82	Q2YMY7	Porin Omp2b	omp2b BAB1_0660	22.2332	23.7363	22.0031	23.3761	23.2562	23.3411	6	25.5182	25.2571	25.6621	25.7908	25.8224	25.6912	6	323.31	1480700000	354	+	+	-2.63262	4.90377e-06
83	Q2YN61	Uncharacterized protein	BAB1_0729	19.5169	21.092	19.3149	19.392	20.4375	20.4011	6	22.7537	22.8839	23.02	22.1772	22.0769	22.6709	6	248.02	267390000	90	+	+	-2.57137	1.65482e-05
84	Q2YNC6	6,7-dimethyl-8-ribityllumazine synthase 1 (DMRL synthase 1) (LS 1) (Lumazine synthase 1) (EC 2.5.1.78) (Type I lumazine synthase)	ribH1 BAB1_0791	20.0893	21.6357	20.741	20.1928	20.4809	20.6812	6	23.2701	23.4728	22.7177	23.7791	23.457	22.0505	6	158.96	272220000	43	+	+	-2.48773	2.75916e-05
85	Q2YK02	Uncharacterized protein	BAB2_0880	25.1027	26.3845	25.679	26.569	26.0107	25.9828	6	28.6389	28.5013	28.3643	28.2814	28.3658	28.2591	6	323.31	9603000000	467	+	+	-2.447	6.3275e-07
86	Q2YNH7	Solute-binding protein/glutamate receptor:Ionotropic glutamate receptor:Bacterial extracellular solute-binding protein, family 3	BAB1_0881	21.4642	20.5128	19.2591	20.9971	22.2073	22.9308	6	23.1718	23.9317	23.8853	23.6305	23.5571	23.4316	6	242.48	611170000	120	+	+	-2.37277	0.00135479
87	Q2YJT0	Dihydrodipicolinate synthetase (EC 4.2.1.52)	BAB2_0961	17.1605	NaN	15.5481	16.5035	NaN	NaN	3	18.2325	15.8523	16.3771	17.3529	17.1084	18.0265	6	323.31	384330000	58	+	+	-2.35126	0.0182148
88	Q2YLY4	Uncharacterized protein	BAB1_1543	20.7867	20.6976	21.2358	20.9444	20.8538	20.78	6	23.1709	23.6489	23.1079	23.2238	22.9513	23.0317	6	48.348	299890000	58	+	+	-2.30602	5.52731e-09
89	Q2YKN9	Uncharacterized protein	BAB2_0618	20.2992	22.1326	20.5948	20.7854	21.8959	22.4797	6	23.6594	22.5259	23.8214	23.8555	23.8476	23.4198	6	53.033	443160000	119	+	+	-2.157	0.000510874
90	Q2YND4	Uncharacterized protein	BAB1_0817	21.347	22.7832	21.5943	22.2635	22.4807	22.8427	6	24.1697	24.7255	24.3888	24.4114	24.3811	24.1134	6	297.95	732760000	191	+	+	-2.14638	1.18539e-05
91	F2HZ05	Glycine cleavage system H protein	gcvH BM28_B0694	21.1545	20.5687	21.1301	21.134	20.9164	21.0849	6	22.9488	23.7208	23.4125	23.0053	22.6391	22.9296	6	216.18	399920000	60	+	+	-2.11126	4.42707e-07
92	Q2YJ80	L-threonine aldolase (EC 4.1.2.48)	BAB2_0051	18.573	18.8747	18.9631	19.1718	18.6445	19.0905	6	21.361	21.7394	21.1929	20.2206	21.0192	20.027	6	49.672	57505000	23	+	+	-2.04041	3.55476e-05
93	Q2YLP8	GCN5-related N-acetyltransferase (EC 2.3.1.-)	BAB1_1904	22.2465	21.3562	22.217	21.8723	21.7442	21.3589	6	23.5277	23.6834	23.5581	23.3766	23.7689	24.101	6	132.14	496350000	153	+	+	-1.87009	1.87502e-06
94	Q2YND8	50S ribosomal protein L13	rplM BAB1_0811	20.8156	19.2553	20.3231	18.8673	19.1988	19.7435	6	21.9054	20.9815	22.1347	21.0529	20.8865	22.1688	6	267.39	285620000	100	+	+	-1.82102	0.000931184
95	Q2YIP8	Lipoprotein Omp10	omp10 BAB2_0076	19.456	22.6024	20.3177	20.8141	21.6005	21.7106	6	23.4663	21.8442	23.1841	22.548	22.681	23.2561	6	111.01	320440000	58	+	+	-1.74641	0.00713158
96	F2HZ06	Aminomethyltransferase (EC 2.1.2.10)	gcvT BM28_B0695	20.9144	19.8657	21.7484	20.5908	20.2167	19.2083	6	21.9544	22.1465	22.2659	21.9622	22.2185	22.3451	6	208.11	163770000	62	+	+	-1.7247	0.000801285
97	F2HSA5	Succinyl-CoA ligase [ADP-forming] subunit beta (EC 6.2.1.5) (Succinyl-CoA synthetase subunit beta)	sucC BM28_A1917	25.1635	24.6266	25.1956	24.9852	24.5703	23.7943	6	26.462	26.5175	26.4148	26.1698	26.4097	26.6126	6	323.31	3345100000	477	+	+	-1.70849	1.71451e-05
98	Q2YNC7	NADH-quinone oxidoreductase subunit C (EC 1.6.5.11) (NADH dehydrogenase I subunit C) (NDH-1 subunit C)	nuoC BAB1_0824	19.6345	19.8126	19.8001	19.7982	19.5473	19.5383	6	21.6281	21.5892	20.6402	21.1679	21.5664	21.7019	6	85.565	98080000	42	+	+	-1.69376	2.16992e-06
99	Q2YP18	Integration host factor subunit beta (IHF-beta)	ihfB himD BAB1_0152	22.5094	21.4966	20.8742	22.449	22.6913	21.8907	6	24.0625	24.3462	23.3821	23.6417	22.8287	23.7819	6	37.072	385150000	64	+	+	-1.68865	0.000851905
100	Q2YLS1	Succinyl-CoA ligase [ADP-forming] subunit alpha (EC 6.2.1.5)	BAB1_1925	24.2422	23.4987	24.1579	23.8081	23.3752	22.8458	6	25.3247	25.2631	25.3413	25.0688	25.4549	25.4569	6	205.6	1528100000	240	+	+	-1.66362	2.10176e-05
101	Q2YNY3	Outer membrane protein, putative	BAB1_0116	23.1068	24.0816	22.7933	23.7941	23.6413	24.1588	6	24.8387	24.8595	25.5123	25.2692	25.2017	25.3437	6	323.31	989900000	210	+	+	-1.57487	8.28624e-05
102	Q2YLU2	Peptidylprolyl isomerase (EC 5.2.1.8)	BAB1_1944	21.2182	22.2038	21.5916	21.1936	22.6395	22.4114	6	23.3597	23.6018	23.3222	23.4238	22.9835	23.4029	6	186.78	471010000	180	+	+	-1.47265	0.000267679
103	Q2YP63	Aldehyde dehydrogenase (EC 1.2.1.3)	BAB1_0211	22.1329	23.348	22.9698	22.7966	22.6616	23.4081	6	24.2017	24.8295	23.7297	24.4762	24.2291	24.4797	6	281.92	1008900000	325	+	+	-1.43819	0.00015655
104	Q2YM12	50S ribosomal protein L1	rplA BAB1_1267	22.7746	20.9777	22.3225	22.4064	21.2586	21.1587	6	23.1043	23.3181	23.5559	23.2331	23.103	23.1803	6	160.41	503040000	143	+	+	-1.43271	0.00124338
105	F2HUA9	Cobalt ABC transporter periplasmic binding protein CbiN	BM28_A1376	23.3856	24.9365	23.6739	24.4243	24.9402	24.788	6	25.8605	26.1149	26.0584	25.5643	25.9013	25.2433	6	323.31	1551500000	273	+	+	-1.43237	0.000879632
106	Q2YM78	Glyoxalase/Bleomycin resistance protein/dioxygenase domain:Glyoxalase I (EC 4.4.1.5)	gloA BAB1_1286	23.5497	24.8139	23.2605	24.666	25.0824	25.4761	6	25.8304	25.8171	26.1602	25.7843	25.9984	25.5484	6	323.31	2066500000	304	+	+	-1.38168	0.0037719
107	Q2YK18	Probable acid stress chaperone HdeA	hdeA BAB2_0862	27.1754	28.5223	27.3806	27.9328	28.6739	28.8187	6	29.5482	29.5262	29.5224	29.5886	29.6169	28.9205	6	232.23	30288000000	449	+	+	-1.36985	0.00113049
108	F2HQS8	Beta-lactamase domain-containing protein	BM28_A1007	19.7151	21.8633	19.9802	20.7587	21.5475	21.4005	6	22.1682	22.546	22.4213	21.8916	21.9841	22.4604	6	63.674	194790000	76	+	+	-1.36772	0.00452373
109	F2HSA6	Malate dehydrogenase (EC 1.1.1.37)	mdh BM28_A1918	25.415	23.4164	24.6726	23.6396	23.4095	23.2366	6	25.2109	25.1416	25.0172	25.4269	25.0588	26.0802	6	323.31	2015000000	403	+	+	-1.35765	0.00621215
110	Q2YL86	Leu/Ile/Val-binding protein homolog 4	BAB2_0023	22.247	22.5234	22.6174	22.5247	22.2233	22.2442	6	23.8166	24.0486	23.5893	23.615	23.5305	23.8339	6	276.34	415790000	165	+	+	-1.34234	2.07196e-07
111	Q2YMR8	ErfK/YbiS/YcfS/YnhG:Twin-arginine translocation pathway signal	BAB1_0589	21.1718	21.62	21.2672	21.2275	21.7093	22.0374	6	22.8737	22.9746	22.7336	22.8841	22.7345	22.8024	6	47.668	304330000	101	+	+	-1.3283	3.4549e-06
112	Q2YLV3	Universal stress protein	BAB1_1967	20.2693	19.8896	20.6125	18.904	20.1862	19.6012	6	21.535	20.9493	21.0632	21.119	21.1389	21.5403	6	94.056	90340000	52	+	+	-1.3138	0.000588432
113	Q2YQH0	CBS domain	BAB1_1274	24.9021	25.6681	26.262	25.9866	26.4689	26.9488	6	27.6353	27.2492	27.0757	27.1802	27.2602	27.6372	6	323.31	5670700000	454	+	+	-1.30019	0.0016354
114	Q2YKV9	Superoxide dismutase [Cu-Zn] (EC 1.15.1.1)	sodC BAB2_0535	28.8277	30.223	28.7811	29.3431	30.2942	30.3999	6	31.1737	30.69	31.0237	30.8881	30.9956	30.8398	6	323.31	75483000000	1848	+	+	-1.29034	0.00214254
115	Q2YRA0	50S ribosomal protein L22	rplV BAB1_1250	21.5201	21.9555	21.5087	21.973	21.7263	21.5364	6	22.8355	23.1736	23.4527	23.3195	22.603	22.5716	6	134.63	474220000	161	+	+	-1.2893	2.66637e-05
116	Q2YPU4	Uncharacterized protein	BAB1_1419	27.8294	29.4746	28.2509	28.8856	29.4219	29.784	6	29.9873	30.1251	30.2375	30.4034	30.4435	30.0637	6	323.31	49682000000	1301	+	+	-1.26905	0.00277576
117	Q2YRT5	50S ribosomal protein L15	rplO BAB1_1236	23.1745	23.1102	23.0315	23.2565	22.6414	22.7331	6	24.2741	24.3376	24.4183	24.2476	23.9989	24.2096	6	270.31	1092700000	229	+	+	-1.25647	8.17819e-07
118	Q2YLE0	7Fe ferredoxin:4Fe-4S ferredoxin, iron-sulfur binding domain	fdxA BAB1_1778	22.5426	24.5085	22.3754	23.2035	24.0398	24.1385	6	25.1399	24.5358	24.9279	24.5024	24.8103	24.4152	6	178.63	1146700000	135	+	+	-1.25386	0.00827405
119	Q2YN92	Rhodopsin-like GPCR superfamily:Lumazine-binding protein (EC 2.5.1.9)	BAB1_0790	22.9101	24.4825	23.1203	23.2838	24.1145	24.213	6	25.2708	25.0064	24.8584	24.9079	24.7279	24.8596	6	323.31	1151000000	342	+	+	-1.25112	0.00120163
120	Q2YLB9	Leu/Ile/Val-binding protein family	BAB2_0282	23.1231	22.4167	23.5963	23.3515	21.7964	22.1423	6	23.836	24.0654	23.9707	24.0053	23.9875	24.0423	6	323.31	621960000	249	+	+	-1.24682	0.00181677
121	Q2YN31	Dihydroorotase (DHOase) (EC 3.5.2.3)	pyrC-1 pyrC BAB1_0688	23.7373	25.2269	23.6158	24.6918	25.1174	25.7728	6	25.7568	25.8973	26.1343	25.8428	25.9434	25.878	6	318.91	2199800000	432	+	+	-1.21511	0.00653958
122	Q2YRU1	50S ribosomal protein L17	rplQ BAB1_1230	21.3508	21.1491	20.0296	21.1174	22.0454	21.7073	6	22.0614	22.2597	22.8292	23.1811	22.1259	22.2105	6	104.31	328120000	94	+	+	-1.21136	0.00484131
123	F2HQV0	Glyceraldehyde-3-phosphate dehydrogenase (EC 1.2.1.-)	BM28_A1729	24.2992	23.0305	24.528	23.8742	23.2933	22.8958	6	25.372	24.8754	24.553	24.7665	24.7813	24.7233	6	323.31	2134400000	407	+	+	-1.19173	0.00266815
124	Q2YKA5	Uncharacterized protein	BAB2_0759	20.8003	19.9634	20.9873	19.856	20.0683	19.4412	6	21.5505	21.7506	20.8734	20.7375	21.6586	21.6364	6	50.577	101660000	33	+	+	-1.18174	0.00286143
125	Q2YMF5	Exodeoxyribonuclease 7 small subunit (EC 3.1.11.6) (Exodeoxyribonuclease VII small subunit)	xseB BAB1_0457	21.0443	23.0314	21.0684	21.8039	22.577	22.6917	6	23.2724	22.8303	23.7063	22.9369	23.2683	22.8869	6	120.82	320200000	115	+	+	-1.11406	0.0142248
126	Q2YN40	Nucleoside diphosphate kinase (NDK) (NDP kinase) (EC 2.7.4.6) (Nucleoside-2-P kinase)	ndk BAB1_0715	26.0506	27.4765	26.3501	26.7593	27.2775	27.2331	6	27.9985	27.8788	28.015	27.9638	28.0541	27.9015	6	323.31	9857100000	643	+	+	-1.11078	0.000782547
127	Q2YRN7	Uncharacterized protein	BAB1_1524	20.6868	21.7512	21.0893	20.6525	21.049	21.7862	6	22.4667	22.176	21.9983	22.1306	22.2043	22.4816	6	136.7	162700000	82	+	+	-1.07375	0.000599234
128	Q2YRT2	50S ribosomal protein L18	rplR BAB1_1239	23.1349	23.784	22.833	23.9439	23.8033	23.6765	6	24.1578	24.8045	24.9282	25.1068	24.5834	23.9855	6	265.11	1333000000	233	+	+	-1.06511	0.00190625
129	Q2YMC5	ATP synthase subunit b 1 (ATP synthase F(0) sector subunit b 1) (ATPase subunit I 1) (F-type ATPase subunit b 1) (F-ATPase subunit b 1)	atpF1 BAB1_0413	21.348	20.8018	21.5254	20.7671	20.519	20.4839	6	21.6631	22.4571	21.6178	22.3433	22.1487	21.5301	6	94.683	251430000	55	+	+	-1.05249	0.00144514
130	Q2YLK6	30S ribosomal protein S16	rpsP BAB1_1832	23.0485	23.9586	22.969	23.7891	23.4906	23.3589	6	24.1189	24.8593	24.8507	24.744	24.3638	23.9618	6	323.31	1035700000	244	+	+	-1.04731	0.000943406
131	F2HZN0	N-acetylglucosamine-6-phosphate deacetylase (EC 3.5.1.25) (GlcNAc 6-P deacetylase)	nagA BM28_B0876	23.2119	23.8182	23.5151	23.688	23.6318	23.5405	6	24.6827	24.572	24.4598	24.7721	24.5957	24.5282	6	246.04	697100000	216	+	+	-1.03415	7.60688e-07
132	F2HRU8	Pyridoxine/pyridoxamine 5'-phosphate oxidase (EC 1.4.3.5) (PNP/PMP oxidase) (Pyridoxal 5'-phosphate synthase)	pdxH BM28_A0439	23.1329	24.0989	22.9761	22.8089	23.4348	22.6242	6	24.4098	25.0594	23.6111	24.1691	23.8544	23.9939	6	30.296	654690000	72	+	+	-1.00365	0.00734575
133	Q2YQV7	50S ribosomal protein L20	rplT BAB1_2124	21.6756	21.4254	21.636	21.0128	20.763	21.9663	6	22.3487	22.5524	22.8792	22.8347	21.8418	22.0373	6	101.42	322470000	84	+	+	-1.00251	0.00255902
134	Q2YMH2	50S ribosomal protein L9	rplI BAB1_0477	23.9745	24.6909	23.96	24.46	24.5659	24.3259	6	25.2315	25.4881	25.5381	25.4622	25.256	24.9151	6	323.31	1831500000	382	+	+	-0.985639	9.08869e-05
135	Q2YND9	30S ribosomal protein S9	rpsI BAB1_0810	23.4835	23.2369	23.4076	24.0556	23.8179	23.8546	6	24.5377	24.7919	25.0028	24.6059	24.4849	24.0918	6	323.31	1071100000	217	+	+	-0.943166	0.000368249
136	Q2YQY2	ATP/GTP-binding site motif A (P-loop)	BAB1_2094	21.3697	22.0646	21.229	21.628	22.0426	21.2755	6	22.4206	22.5236	22.1937	22.8192	22.651	22.6388	6	114.13	220760000	94	+	+	-0.939554	0.000347756
137	Q2YRA6	50S ribosomal protein L24	rplX BAB1_1244	22.7234	22.9005	22.8869	23.0036	23.1255	23.4468	6	23.8143	24.0378	24.5173	23.9875	23.9033	23.4406	6	46.189	948900000	110	+	+	-0.935709	0.00033256
138	Q2YMJ0	Uncharacterized protein	BAB1_0491	21.3753	21.9548	20.6303	21.529	21.6544	21.9995	6	22.8173	21.7404	22.6764	22.3712	22.3804	22.6643	6	52.849	180440000	75	+	+	-0.917785	0.00519514
139	Q2YP35	Protein GrpE (HSP-70 cofactor)	grpE BAB1_0170	23.9346	24.0798	23.8256	23.8647	23.8104	23.2691	6	24.7658	24.6802	24.9311	24.6385	24.5617	24.6978	6	323.31	1176300000	335	+	+	-0.915175	2.41108e-05
140	Q2YRZ2	Uncharacterized protein	BAB1_1754	23.9973	25.3941	24.1733	24.7617	25.1795	25.1216	6	25.8494	25.8509	25.3023	25.4303	25.9699	25.6504	6	269.64	1956100000	220	+	+	-0.904296	0.00555234
141	Q2YM05	50S ribosomal protein L23	rplW BAB1_1253	22.2349	22.9474	21.8258	22.8794	22.7633	22.0687	6	23.3725	23.5359	23.698	23.4783	23.3031	22.7363	6	257.74	539460000	156	+	+	-0.900767	0.00333838
142	Q2YNF9	NADH dehydrogenase (Ubiquinone), 24 kDa subunit (EC 1.6.5.3)	nuoE BAB1_0826	20.8698	20.6483	21.0154	20.6799	20.4638	20.4036	6	21.8543	21.226	21.6126	21.1011	21.726	21.8624	6	82.108	119170000	83	+	+	-0.883595	0.000301215
143	Q2YRN8	Transcription elongation factor GreA (Transcript cleavage factor GreA)	greA BAB1_1523	22.89	24.2084	22.9375	23.3977	23.7582	23.5444	6	24.6326	24.3122	24.6891	24.301	24.3967	23.6889	6	190.76	965080000	223	+	+	-0.880739	0.00568228
144	Q2YN49	Peptidyl-prolyl cis-trans isomerase, putative	BAB1_0706	22.3388	22.903	22.1111	22.2438	22.1587	22.6706	6	23.2471	23.3764	23.2031	23.3601	23.086	23.3969	6	321.52	391130000	143	+	+	-0.873916	8.45751e-05
145	Q2YLX6	50S ribosomal protein L25 (General stress protein CTC)	rplY ctc BAB1_1551	25.2167	25.9042	24.0206	25.3186	25.7312	25.9687	6	26.5096	26.3676	26.2723	26.1581	26.1098	25.9709	6	323.31	3416700000	434	+	+	-0.871392	0.0172764
146	F2HS75	Acyl-CoA thioesterase II	tesB BM28_A1887	20.703	22.7403	21.1816	21.8108	21.85	21.445	6	22.6682	22.5358	22.6308	22.3253	22.4886	22.268	6	209.5	273940000	136	+	+	-0.864321	0.0140075
147	Q2YQ75	TatD-related deoxyribonuclease (EC 3.1.21.-)	BAB1_1015	20.3226	20.4968	19.398	20.6275	20.8203	21.2943	6	21.1525	21.3108	21.5051	21.4601	21.4583	21.1705	6	48.309	100980000	50	+	+	-0.849669	0.0095006
148	Q2YPP2	Uncharacterized protein	BAB1_0051	21.9137	23.3456	22.3328	22.4815	22.5889	22.6422	6	23.5002	23.5407	23.3214	23.3966	23.4442	23.154	6	254.23	523160000	224	+	+	-0.842075	0.00178818
149	Q2YMX6	Probable periplasmic serine endoprotease DegP-like (EC 3.4.21.107) (Protease Do)	htrA BAB1_0635	23.9298	24.3771	24.149	23.7084	24.2887	23.9537	6	25.1972	25.0806	24.4327	24.9458	24.7864	24.8894	6	323.31	1275400000	406	+	+	-0.820927	0.000258163
150	Q2YN45	Probable cytosol aminopeptidase (Leucine aminopeptidase) (Leucyl aminopeptidase)	pepA BAB1_0710	26.6855	27.6091	26.6223	27.3431	27.6059	27.4523	6	28.1043	28.0736	28.0256	28.0399	28.123	27.8671	6	323.31	9807500000	1067	+	+	-0.819215	0.00140088
151	Q2YPY6	Peptidyl-prolyl cis-trans isomerase (EC 5.2.1.8)	BAB1_1117	24.386	25.5261	24.6924	24.7153	25.2237	25.0413	6	25.9306	25.6022	25.8073	25.7354	25.6743	25.7233	6	323.31	2161400000	357	+	+	-0.814704	0.00089355
152	F2HQZ1	50S ribosomal protein L32	rpmF BM28_A1770	20.4511	21.3131	20.5239	20.8703	20.7561	20.7634	6	21.9786	21.5635	21.8679	21.4858	21.6878	20.9543	6	73.324	144060000	47	+	+	-0.809977	0.00185487
153	Q2YIJ2	10 kDa chaperonin (GroES protein) (Protein Cpn10)	groS groES BAB2_0190	27.5758	29.0368	27.7203	28.3553	28.8709	28.9889	6	29.213	29.2666	29.5308	29.1088	29.1849	28.9851	6	323.31	29822000000	995	+	+	-0.790192	0.0167936
154	Q2YIY2	Periplasmic binding protein/LacI transcriptional regulator	rbsB-2 BAB2_0377	26.9292	27.8622	27.0395	27.6452	27.758	27.7817	6	28.2662	28.1839	28.6318	28.2152	28.4139	28.0455	6	323.31	12328000000	869	+	+	-0.79011	0.00173651
155	F2HU01	Uncharacterized protein	BM28_A0646	21.8296	22.2451	21.9925	22.4431	22.2244	21.9101	6	22.7631	23.0115	22.9668	22.9474	22.6949	22.9937	6	79.5	304490000	115	+	+	-0.788758	3.043e-05
156	Q2YPE7	Secretion protein HlyD	BAB1_0322	20.4034	20.1421	20.2834	20.4195	19.9933	19.416	6	20.3958	20.7164	20.0695	21.2707	21.4101	21.4796	6	33.043	76974000	29	+	+	-0.780735	0.0204956
157	Q2YM04	50S ribosomal protein L4	rplD BAB1_1254	24.2962	24.314	24.3994	24.4653	24.2345	24.2337	6	25.0344	25.2333	25.3047	25.2201	25.2092	24.6228	6	323.31	1930100000	412	+	+	-0.780227	3.23418e-05
158	F2HS46	Outer membrane protein assembly factor BamA	yaeT bamA BM28_A1162	23.9258	24.8821	23.807	24.578	24.8162	25.0135	6	25.7463	25.0678	25.2021	25.0433	25.272	25.3228	6	323.31	1811100000	467	+	+	-0.771969	0.00815619
159	Q2YPM9	Nucleoid-associated protein BAB1_0030	BAB1_0030	21.9042	22.3827	21.7627	22.2516	21.9761	21.7607	6	22.9906	22.8761	22.8284	22.8233	22.6047	22.5341	6	33.678	281520000	100	+	+	-0.769865	0.000119594
160	Q2YRT8	30S ribosomal protein S13	rpsM BAB1_1233	22.6105	23.1431	22.3832	23.3911	23.366	23.6161	6	23.8351	24.0445	24.1735	23.8168	23.6439	23.5525	6	270.69	695260000	151	+	+	-0.759392	0.00618759
161	Q2YNV2	Uncharacterized protein	BAB1_0075	23.2069	22.483	22.7882	22.4105	22.4312	22.8476	6	23.6315	23.4853	23.4371	23.3981	22.9906	23.7222	6	236.35	569860000	136	+	+	-0.749558	0.00104625
162	F2HX52	Aldo/keto reductase	BM28_B0178	23.157	23.3291	23.0299	22.9955	23.1723	23.0225	6	23.9516	23.7745	23.6625	23.9044	23.996	23.894	6	323.31	601080000	221	+	+	-0.746134	1.20152e-06
163	Q2YKJ4	Uncharacterized protein	BAB2_0665	24.169	24.1521	24.3258	24.3128	24.4979	24.4327	6	23.8713	23.138	22.7474	23.2843	24.2725	24.1023	6	109.1	1075100000	125	+	+	0.745753	0.0143542
164	Q2YNP2	Biotin/lipoyl attachment:Acetyl-CoA biotin carboxyl carrier:Biotin-requiring enzyme, attachment site	accB BAB1_0925	24.0727	23.8164	23.6143	23.6836	23.409	22.8181	6	23.3102	22.0789	23.4223	22.8501	22.6487	22.4237	6	78.101	591240000	77	+	+	0.780011	0.017365
165	Q2YNW9	Dihydroxy-acid dehydratase (DAD) (EC 4.2.1.9)	ilvD BAB1_0096	21.5681	22.5744	21.918	21.6804	22.2611	21.8472	6	21.3947	21.5031	21.4571	20.694	21.2739	20.7804	6	225.39	178430000	94	+	+	0.790997	0.00387281
166	Q2YMR3	Transcriptional regulatory protein MucR	BAB1_0594	25.1365	24.4493	25.1174	24.4782	24.5927	24.0403	6	23.5686	24.0355	24.3494	23.5606	23.3644	24.0367	6	323.31	1064400000	154	+	+	0.816544	0.00549923
167	Q2YIW0	30S ribosomal protein S21	rpsU BAB2_0269	21.1317	21.0196	21.6621	22.1333	21.5363	21.1323	6	20.2855	20.5078	20.8071	20.8457	20.7817	20.356	6	52.677	151060000	70	+	+	0.838593	0.00189513
168	Q2YRQ8	Citrate synthase (EC 2.3.3.16)	gltA BAB1_1170	22.9003	22.176	22.6867	22.5651	22.1486	21.7008	6	21.5955	21.6639	21.2925	21.2648	21.5494	21.7651	6	277.83	323360000	129	+	+	0.841035	0.00160931
169	F2HQX7	Thiamine transporter substrate binding subunit	tbpA BM28_A1756	25.7169	27.3446	25.6255	26.3163	26.973	26.9239	6	25.7025	25.4158	25.7741	25.5439	25.7463	25.5186	6	323.31	3091000000	547	+	+	0.866488	0.0151476
170	F2HX69	Isoleucine--tRNA ligase (EC 6.1.1.5) (Isoleucyl-tRNA synthetase)	ileS BM28_B0195	20.9098	21.8554	20.7489	21.1302	20.7711	20.5433	6	19.8127	20.4089	20.2699	20.2442	19.9468	20.0688	6	108.36	122460000	62	+	+	0.86789	0.0020651
171	Q2YKC2	Uncharacterized protein	BAB2_0740	19.7941	21.455	20.7304	20.8913	20.3585	20.0542	6	19.6219	19.6356	19.8155	19.8395	19.6743	19.3474	6	60.37	70070000	20	+	+	0.891572	0.00600063
172	Q2YKX5	Bacterial periplasmic spermidine/putrescine-binding protein:Gliadin, alpha/beta:Bacterial extracellular solute-binding protei	BAB2_0519	24.7857	25.7927	24.7567	25.3252	25.8362	26.0024	6	24.5459	24.2145	24.8924	24.2045	24.7868	24.4973	6	323.31	1938400000	390	+	+	0.892929	0.00533681
173	F2HSE5	Malonyl CoA-acyl carrier protein transacylase (EC 2.3.1.39)	fabD BM28_A0477	22.0697	20.9229	22.3161	21.5762	21.0408	20.6667	6	20.4789	20.3161	20.3773	20.708	20.3241	20.9895	6	200.25	155200000	66	+	+	0.89977	0.0116838
174	Q2YJM1	Peptide methionine sulfoxide reductase MsrA (Protein-methionine-S-oxide reductase) (EC 1.8.4.11) (Peptide-methionine (S)-S-oxide reductase) (Peptide Met(O) reductase)	msrA BAB2_1029	19.6631	19.0878	20.2144	19.7543	18.9382	18.7556	6	18.2673	18.6826	18.384	18.3568	18.393	18.8472	6	58.622	37627000	32	+	+	0.913768	0.0041556
175	Q2YLN2	Glutaredoxin:Thioredoxin type domain	grxC BAB1_1879	22.4711	23.477	22.904	22.463	23.4621	23.192	6	22.3185	22.031	22.2295	21.8798	21.8608	22.0519	6	183.39	449590000	116	+	+	0.932945	0.000951809
176	F2HYV3	Aldehyde dehydrogenase	BM28_B0642	24.8041	24.5638	25.6216	24.9648	24.5485	24.0955	6	23.7805	23.8888	23.7094	23.6876	23.9015	23.7966	6	323.31	1196400000	316	+	+	0.972319	0.00100537
177	Q2YQ16	Acetyl-CoA hydrolase/transferase	BAB1_1077	23.1103	21.4658	22.4213	21.9519	21.831	21.749	6	21.318	20.0767	20.8149	21.6406	21.4338	21.2699	6	42.956	208960000	61	+	+	0.99594	0.0138105
178	Q2YQR0	Enoyl-[acyl-carrier-protein] reductase [NADH] (EC 1.3.1.9)	fabI-2 BAB1_2172	21.6694	19.6633	21.2027	20.498	20.38	20.2992	6	19.0915	19.2914	19.3466	19.9728	19.6147	20.4131	6	123.55	94345000	40	+	+	0.9971	0.0181188
179	Q2YRJ0	ATP/GTP-binding site motif A (P-loop)	BAB1_1186	23.474	24.3791	23.3691	23.7157	24.1899	23.86	6	22.8238	22.9028	22.8997	22.8981	22.6537	22.7906	6	153.56	529360000	166	+	+	1.00314	0.000127817
180	Q2YRR5	Anthranilate phosphoribosyltransferase (EC 2.4.2.18)	trpD BAB1_1163	20.7085	19.8194	21.0831	20.714	19.5249	18.9554	6	19.0651	19.1429	19.122	19.1607	19.0346	19.1876	6	22.246	60202000	20	+	+	1.01539	0.0134088
181	Q2YKG1	Bacterial extracellular solute-binding protein, family 5	BAB2_0699	26.1707	25.5741	26.5437	26.0184	25.6369	25.5205	6	24.9416	24.7643	24.9671	24.6964	25.0233	24.9428	6	323.31	7309100000	820	+	+	1.02146	0.000153509
182	Q2YQC0	Uncharacterized protein	BAB1_1641	25.7445	27.4238	25.3486	26.3255	26.8646	27.3827	6	25.522	25.1611	25.6409	25.1365	25.8196	25.674	6	189.91	3771100000	216	+	+	1.02262	0.0198073
183	F2HUR6	DNA gyrase subunit B (EC 5.99.1.3)	gyrB BM28_A0133	21.6239	19.7108	21.2661	21.3387	20.1089	19.6736	6	19.7793	19.5777	19.9466	19.4291	19.1359	19.6451	6	83.303	82361000	38	+	+	1.03469	0.0213554
184	Q2YKN7	Uncharacterized protein	BAB2_0620	22.1645	23.9858	22.4475	22.6092	22.7691	23.7402	6	21.4591	21.564	21.8777	22.1251	22.1684	22.2736	6	204.61	633440000	94	+	+	1.0414	0.0103826
185	Q2YRP0	Bacterial regulatory proteins, AsnC family	lrp-1 BAB1_1521	22.8345	22.9323	23.3209	23.0958	22.8937	22.7199	6	21.9156	22.0593	21.8549	21.9571	21.6998	22.0426	6	77.854	367690000	108	+	+	1.04463	1.34272e-06
186	F2HWQ0	Oligoendopeptidase, pepF/M3 family protein	BM28_B0084	22.4611	21.3167	22.2094	21.2687	20.6231	20.1974	6	20.2861	20.4219	19.8676	20.1952	20.2587	20.7326	6	50.221	132410000	33	+	+	1.05239	0.0188101
187	Q2YPU8	CTP synthase (EC 6.3.4.2) (CTP synthetase) (UTP--ammonia ligase)	pyrG BAB1_1157	21.068	22.308	22.3907	22.0047	21.5264	21.2809	6	20.6213	21.1722	20.8778	20.5442	20.65	20.3373	6	42.091	170610000	56	+	+	1.06262	0.00189138
188	Q2YLI5	ATP synthase subunit alpha (EC 3.6.3.14) (ATP synthase F1 sector subunit alpha) (F-ATPase subunit alpha)	atpA BAB1_1809	23.7717	22.6082	23.9308	23.7066	22.4411	22.0444	6	21.7141	21.9752	22.2187	22.0312	22.0053	22.1267	6	323.31	655800000	198	+	+	1.07194	0.0100976
189	Q2YNM1	Immunogenic membrane protein YajC	yajC BAB1_0909	21.8805	22.0745	22.2191	21.3158	21.4929	21.8309	6	20.9288	21.1022	20.7888	20.6549	20.4791	20.4138	6	32.611	159830000	48	+	+	1.07435	0.000119027
190	F2HRD9	UspA domain-containing protein	BM28_A1058	24.8633	23.1729	24.9867	23.6035	23.4134	23.0668	6	22.8197	22.6211	22.2743	22.7918	22.7285	23.1664	6	253.89	810610000	225	+	+	1.11746	0.0125453
191	Q2YPV4	Biotin/lipoyl attachment:2-oxo acid dehydrogenase, acyltransferase component, lipoyl-binding:Transketolase, central region:Tr (EC 1.2.4.1)	BAB1_1151	23.888	23.224	24.0704	23.428	22.8828	22.3827	6	22.21	22.2548	21.9929	22.1001	22.0895	22.3951	6	289.36	559570000	131	+	+	1.13891	0.00149588
192	Q2YR81	Histidinol-phosphate aminotransferase (EC 2.6.1.9) (Imidazole acetol-phosphate transaminase)	hisC BAB1_1988	20.5601	19.8202	21.2733	20.7211	19.5845	19.7958	6	18.8701	19.2012	19.204	19.0516	18.9756	19.5459	6	34.485	61456000	19	+	+	1.15114	0.00246628
193	Q2YLU8	Hydroxyacylglutathione hydrolase (EC 3.1.2.6) (Glyoxalase II) (Glx II)	gloB BAB1_1936	21.3787	20.7191	21.7569	20.5442	20.0837	19.7562	6	19.9511	18.9929	19.247	19.895	19.6254	19.5627	6	96.086	97235000	59	+	+	1.16079	0.0071279
194	Q2YNL2	Aspartyl/glutamyl-tRNA(Asn/Gln) amidotransferase subunit B (Asp/Glu-ADT subunit B) (EC 6.3.5.-)	gatB BAB1_0918	22.6047	22.7409	22.6436	22.6378	22.3652	21.9604	6	21.4459	21.1902	21.3182	21.1562	21.1417	21.6358	6	316.25	271000000	142	+	+	1.17744	8.8139e-06
195	Q2YRV5	Tetracycline resistance protein TetB	BAB1_1216	27.8895	29.6254	27.5408	28.3633	28.8404	29.2918	6	27.777	27.5887	27.8647	27.3598	27.4118	26.4512	6	323.31	20184000000	990	+	+	1.18304	0.0126191
196	F2HZ90	ABC transporter periplasmic substrate-binding protein	BM28_B0779	20.7103	20.32	21.3177	21.3423	20.2137	20.0908	6	19.1529	19.7941	19.256	19.4026	19.5327	19.6646	6	17.612	74616000	16	+	+	1.19866	0.000677273
197	Q2YR15	ParB-like nuclease:ParB-like partition protein	BAB1_2059	21.5575	20.1857	21.8386	21.6518	20.5118	20.067	6	19.6026	19.4317	20.1279	19.5859	19.7357	19.7921	6	35.677	115820000	48	+	+	1.25608	0.00423298
198	Q2YRU5	MotY protein:Bacterial outer membrane protein:OmpA/MotB domain	BAB1_1226	22.2572	22.2109	21.6358	21.829	21.8298	21.4273	6	20.8597	20.8345	20.5963	20.4069	20.3771	20.5558	6	264.05	151780000	64	+	+	1.25995	1.09158e-05
199	F2HW06	Sec-independent protein translocase protein TatA	tatA BM28_A0889	21.3027	23.5715	21.6847	22.0602	22.5103	22.6737	6	20.8095	20.9193	21.4816	20.814	21.1531	21.0526	6	33.355	170980000	48	+	+	1.26217	0.00435273
200	Q2YRB8	Oxidoreductase, N-terminal:Oxidoreductase, C-terminal	BAB1_1617	20.4298	18.9413	20.5301	19.9045	18.7149	18.2973	6	18.0106	18.3383	18.0181	18.0989	18.0996	18.566	6	136.4	46280000	27	+	+	1.2811	0.00892126
201	Q2YP66	Zinc-containing alcohol dehydrogenase superfamily:Zinc-containing alcohol dehydrogenase (EC 1.1.1.1)	BAB1_0204	27.5968	28.7903	27.9065	28.376	29.0366	29.399	6	27.1095	27.2028	27.3342	27.0834	27.4668	27.1272	6	323.31	12537000000	617	+	+	1.2969	0.00111766
202	F2HZ24	Family 1 extracellular solute-binding protein	BM28_B0713	24.0893	24.5489	24.1563	24.3348	24.1242	23.8266	6	23.2279	22.7327	22.8079	22.709	22.8001	23.0012	6	323.31	663460000	239	+	+	1.30018	1.42401e-06
203	Q2YNB7	Bacterial regulatory protein, MerR family	BAB1_0800	20.5406	19.7632	21.6433	21.1042	19.5391	20.0812	6	18.7602	19.3928	18.7037	19.5716	19.2567	19.1546	6	110.95	68205000	27	+	+	1.30532	0.0046728
204	Q2YMW6	NAD binding site:ATP/GTP-binding site motif A (P-loop):Aromatic-ring hydroxylase:Electron transfer flavoprotein-ubiquinone ox (EC 1.5.5.1)	BAB1_0645	19.7965	20.1653	20.3872	19.5173	19.6086	19.2695	6	18.0721	18.4785	18.5321	18.5829	18.5993	18.614	6	35.821	39306000	26	+	+	1.31095	4.27198e-05
205	Q2YLQ2	Succinate dehydrogenase iron-sulfur subunit (EC 1.3.5.1)	BAB1_1900	21.7616	21.2799	22.0567	21.6008	20.8906	20.0299	6	19.77	20.4147	19.7875	19.6963	19.862	20.2145	6	84.594	126550000	49	+	+	1.31239	0.0021324
206	Q2YRU0	DNA-directed RNA polymerase subunit alpha (RNAP subunit alpha) (EC 2.7.7.6) (RNA polymerase subunit alpha) (Transcriptase subunit alpha)	rpoA BAB1_1231	24.3629	23.1141	23.9406	23.9421	23.1547	22.3723	6	21.9831	22.1543	22.3262	22.0254	22.3642	22.1386	6	83.823	585300000	149	+	+	1.31581	0.0015276
207	Q2YJP0	Methylglyoxal synthase (MGS) (EC 4.2.3.3)	mgsA BAB2_1009	22.5155	23.781	23.6385	23.6857	23.8058	23.665	6	22.2955	21.9521	22.0569	22.0368	22.255	22.4797	6	174.9	651330000	92	+	+	1.33591	0.000108963
208	Q2YJ78	Type IV secretion system protein virB8	virB8 BAB2_0061	23.8015	23.2052	22.5388	22.2292	22.6326	21.9781	6	21.9976	21.4878	21.1757	21.4294	20.7019	21.5402	6	130.11	180660000	40	+	+	1.34212	0.00202382
209	Q2YNI5	Beta-ketoacyl synthase:ATP/GTP-binding site motif A (P-loop) (EC 2.3.1.41)	BAB1_0872	21.3518	20.0406	21.5433	22.4736	20.8496	20.5901	6	19.4911	20.2141	19.7895	19.7418	19.7453	19.7762	6	35.672	88125000	52	+	+	1.34851	0.00371117
210	F2HS18	Dihydrolipoyl dehydrogenase (EC 1.8.1.4)	lpdA BM28_A1134	23.2914	21.5002	23.0276	22.4373	21.2715	20.7454	6	20.1371	20.8178	20.4794	20.8164	20.2492	21.6807	6	176.98	210600000	60	+	+	1.34883	0.0178504
211	F2HRA3	3-deoxy-7-phosphoheptulonate synthase	BM28_A1022	21.4185	20.8442	22.1096	20.1713	21.2032	19.5081	6	19.6756	20.0434	19.1819	19.2678	19.371	19.3583	6	81.528	80453000	26	+	+	1.39284	0.00592914
212	Q2YKE6	Transketolase, central region:Transketolase, C terminal (EC 1.2.4.4)	BAB2_0714	21.9802	21.0546	22.2957	21.8653	19.899	20.0507	6	19.9087	20.0167	20.1635	19.6705	19.6511	19.2427	6	149.33	333020000	116	+	+	1.41538	0.00929021
213	Q2YLF8	Leu/Ile/Val-binding protein homolog 1	BAB1_1794	23.7084	24.928	24.1795	24.555	24.8884	25.063	6	23.0808	23.0189	23.3159	23.0362	23.2122	23.0246	6	323.31	1525700000	273	+	+	1.43894	6.34019e-05
214	Q2YRV0	Isocitrate dehydrogenase [NADP] (EC 1.1.1.42)	BAB1_1221	21.7784	21.4937	21.9735	21.5733	20.7468	21.8823	6	20.2516	21.0249	20.2199	19.4187	19.5872	20.2868	6	154.78	208510000	76	+	+	1.44314	0.000653036
215	Q2YL65	Thiolase (EC 2.3.1.16)	BAB2_0443	23.7268	22.46	24.1135	23.0426	22.4503	21.8329	6	21.4249	21.7806	21.0956	21.2291	21.7006	21.7245	6	323.31	340720000	140	+	+	1.44517	0.00294935
216	F2HSS1	50S ribosomal protein L6	rplF BM28_A1229	23.2659	23.8402	22.7996	23.7437	23.8038	23.7335	6	22.8315	21.6533	22.7135	21.6818	22.1811	21.3937	6	165.53	632420000	129	+	+	1.45528	0.00062565
217	Q2YPQ8	Argininosuccinate synthase (EC 6.3.4.5) (Citrulline--aspartate ligase)	argG BAB1_0071	21.6442	19.5412	22.5778	19.9576	19.7377	19.7348	6	19.4548	19.1966	18.7892	19.1971	19.0541	18.7657	6	178.99	138690000	56	+	+	1.45597	0.0201499
218	Q2YKT4	Periplasmic binding protein	BAB2_0564	20.6112	20.7613	21.1983	20.6379	19.9181	20.1207	6	19.0057	18.7586	19.3695	18.8263	18.9793	19.5329	6	75.514	62147000	26	+	+	1.46254	7.13933e-05
219	F2HU89	Periplasmic binding protein/LacI transcriptional regulator	BM28_A1356	24.4118	25.8834	24.8769	26.119	25.6591	27.1916	6	24.002	24.374	24.3367	24.3115	24.2039	24.0019	6	323.31	1557900000	323	+	+	1.48531	0.00431125
220	Q2YMP3	GDP-mannose 4,6-dehydratase (EC 4.2.1.47) (GDP-D-mannose dehydratase)	gmd BAB1_0545	24.5022	24.3291	24.711	24.0322	23.635	23.5388	6	22.649	22.7079	22.4172	22.9031	22.4307	22.7232	6	246.02	743200000	192	+	+	1.48621	3.08171e-05
221	F2HR76	Carboxynorspermidine dehydrogenase	BM28_A0367	23.3242	22.2016	22.9865	21.8551	21.0259	21.0087	6	20.9958	21.3313	19.5302	21.2449	19.765	20.4232	6	148.62	184080000	68	+	+	1.51861	0.0132098
222	F2HZ72	Fatty acid oxidation complex subunit alpha	BM28_B0761	23.4113	22.4777	23.6772	22.7938	22.0631	21.385	6	20.916	21.3015	20.9905	20.9062	20.9451	21.5416	6	323.31	274480000	85	+	+	1.53454	0.00177844
223	Q2YM15	DNA-directed RNA polymerase subunit beta (RNAP subunit beta) (EC 2.7.7.6) (RNA polymerase subunit beta) (Transcriptase subunit beta)	rpoB BAB1_1264	24.7482	23.8505	24.9501	24.4968	23.4944	23.0031	6	22.8069	22.5937	22.4029	21.8636	22.8396	22.5038	6	323.31	881550000	315	+	+	1.58876	0.000966575
224	Q2YQR7	Translation initiation factor IF-2	infB BAB1_2165	22.9479	21.5772	23.7469	22.1035	20.9456	20.0813	6	20.1555	20.2337	21.0329	19.586	20.1441	20.6587	6	251.07	276660000	97	+	+	1.59858	0.0202929
225	Q2YKQ9	Leu/Ile/Val-binding protein homolog 6	BAB2_0593	21.9108	22.0614	22.4454	22.1474	21.8947	21.7835	6	20.3383	20.4239	20.7323	20.3255	20.533	20.284	6	323.31	206790000	119	+	+	1.60103	9.59432e-08
226	Q2YQ34	Proline-rich region:Proline-rich extensin	BAB1_1058	20.8988	19.4098	22.2312	20.4502	20.1813	20.504	6	19.2654	18.803	18.9554	18.972	19.0608	18.9883	6	57.811	72264000	29	+	+	1.60505	0.00198105
227	Q2YPG8	dCTP deaminase (EC 3.5.4.13)	BAB1_0336	21.7787	19.8071	22.5359	21.2343	19.8364	19.0624	6	19.2384	19.2929	19.0632	18.7975	19.0225	19.1292	6	42.779	105550000	20	+	+	1.61853	0.0152268
228	Q2YIL0	D-amino acid dehydrogenase (EC 1.4.99.1)	dadA BAB2_0311	22.7975	21.3437	22.4207	21.5179	20.9574	19.6144	6	19.7796	19.7349	19.4106	19.78	19.6298	20.5668	6	154.8	109380000	32	+	+	1.62498	0.00765863
229	F2HT14	Acetyl-coenzyme A carboxylase carboxyl transferase subunit alpha (ACCase subunit alpha) (Acetyl-CoA carboxylase carboxyltransferase subunit alpha) (EC 6.4.1.2)	accA BM28_A2017	22.9908	22.0937	23.6171	22.6901	21.6409	20.8809	6	20.6673	20.9516	20.2868	20.259	20.4278	21.4898	6	164.78	229620000	95	+	+	1.63853	0.00431255
230	Q2YR09	Transcription termination factor Rho (EC 3.6.4.-) (ATP-dependent helicase Rho)	rho BAB1_2065	23.3299	21.8378	23.3268	22.6319	21.815	20.9314	6	20.909	20.387	20.5888	20.8326	20.3287	20.9622	6	281.61	337440000	164	+	+	1.64408	0.00228503
231	Q2YP10	Phosphoenolpyruvate-dependent sugar phosphotransferase system, EIIA 2:PTS IIA-like nitrogen-regulatory protein PtsN (EC 2.7.1.69)	BAB1_0160	23.096	22.2742	23.125	22.4498	22.0155	20.2197	6	21.1561	20.6556	20.9538	20.2844	20.4723	19.7031	6	108.93	191380000	52	+	+	1.65913	0.00642991
232	F2HQW9	Pyruvate kinase (EC 2.7.1.40)	BM28_A1748	22.9831	21.1542	23.1419	21.6542	21.1986	20.3197	6	19.913	20.4444	19.7726	19.8388	19.9663	20.5307	6	119.68	207140000	70	+	+	1.66432	0.00552406
233	Q2YP67	Bacterial extracellular solute-binding protein, family 1	BAB1_0238	24.6389	24.5875	24.7572	24.7402	24.6095	24.5677	6	22.9024	23.0847	22.7997	22.9905	22.9376	23.1979	6	323.31	1351400000	288	+	+	1.66469	2.20705e-10
234	Q2YQR9	Transcription termination/antitermination protein NusA	nusA BAB1_2163	24.1173	21.8988	24.1688	24.093	23.2673	23.117	6	21.1396	22.576	21.5833	21.4717	21.848	21.9942	6	113.42	511670000	90	+	+	1.67487	0.00235675
235	Q2YLA2	Hydroxypyruvate isomerase (EC 5.3.1.22)	BAB2_0144	22.5569	24.2928	22.4035	23.3251	24.2073	24.0038	6	21.5873	21.7401	22.332	21.2217	22.2209	21.5404	6	243.56	398250000	160	+	+	1.69116	0.0013065
236	Q2YNQ4	ATP/GTP-binding site motif A (P-loop):ABC transporter:AAA ATPase	BAB1_0949	21.486	20.2885	21.0521	21.24	20.7383	19.6463	6	18.9548	18.9785	19.0768	18.8173	18.9809	19.4507	6	128.71	84005000	59	+	+	1.69871	0.000163747
237	Q2YLY8	D-alanine--D-alanine ligase (EC 6.3.2.4) (D-Ala-D-Ala ligase) (D-alanylalanine synthetase)	ddl BAB1_1447	20.903	20.0887	20.8841	20.6847	19.0741	19.2106	6	18.9854	18.3871	18.1873	18.2059	18.1778	18.1759	6	21.97	53471000	24	+	+	1.78765	0.000597619
238	Q2YIG7	NADH:flavin oxidoreductase/NADH oxidase	BAB2_0335	25.3321	24.8738	25.3056	24.7524	24.4828	24.1314	6	23.1094	22.9759	22.8626	23.185	23.0141	22.972	6	323.31	879100000	181	+	+	1.79319	3.63856e-06
239	Q2YLG9	ATP/GTP-binding site motif A (P-loop):Bacterial NAD-glutamate dehydrogenase (EC 1.4.1.2)	BAB1_1827	24.034	22.3272	24.0741	23.1484	21.9844	21.2979	6	20.8859	21.2744	21.2464	20.983	20.5103	21.1883	6	323.31	427170000	155	+	+	1.79629	0.00370257
240	F2HQJ0	Histidinol dehydrogenase (HDH) (EC 1.1.1.23)	hisD BM28_A0287	22.623	22.1102	23.406	22.52	22.0754	21.8601	6	20.2029	20.7848	20.2749	20.6597	20.2216	21.5753	6	159.68	230970000	73	+	+	1.81255	0.000176236
241	Q2YIQ8	Ketose-bisphosphate aldolase, class-II:Fructose-bisphosphate aldolase, class II, Calvin cycle subtype (EC 4.1.2.13)	fbaA BAB2_0365	24.2169	23.5686	24.013	23.5339	23.6538	23.2036	6	22.1769	21.718	21.6599	21.7218	21.6998	21.9657	6	291.85	961120000	251	+	+	1.8746	6.45041e-07
242	F2HRX0	Uncharacterized protein	BM28_A0461	23.2195	24.212	23.3738	23.8234	24.3051	24.0454	6	22.5099	21.9337	21.8542	21.8425	21.8047	21.7216	6	97.053	562050000	101	+	+	1.88544	5.56138e-06
243	F2HSU5	DNA-directed RNA polymerase subunit beta' (RNAP subunit beta') (EC 2.7.7.6) (RNA polymerase subunit beta') (Transcriptase subunit beta')	rpoC BM28_A1253	24.2974	22.777	24.4606	23.6903	22.68	22.1924	6	21.2869	21.2959	20.9393	21.0503	21.372	21.8211	6	323.31	580860000	251	+	+	2.05538	0.00045019
244	F2HTS9	Ivd, isovaleryl-CoA dehydrogenase	BM28_A0019	25.2019	24.127	25.7701	25.1946	24.3298	23.6608	6	22.5393	22.7146	22.3411	22.5305	22.7667	22.7627	6	323.31	1267300000	274	+	+	2.10489	8.68846e-05
245	Q2YRN2	Carbamoyl-phosphate synthase large chain (EC 6.3.5.5) (Carbamoyl-phosphate synthetase ammonia chain)	carB BAB1_1508	23.0309	22.1837	22.8449	22.569	20.9616	20.5406	6	19.8086	19.9833	19.3905	20.1206	20.192	19.902	6	88.467	280920000	91	+	+	2.1223	0.000673091
246	Q2YQT2	Ferritin:DNA-binding protein Dps	BAB1_2150	28.1517	29.9383	28.0323	29.335	29.1257	29.5501	6	28.3335	27.9056	26.7655	26.128	26.3623	25.8197	6	323.31	16635000000	870	+	+	2.13644	0.00210481
247	Q2YKR5	sn-glycerol-3-phosphate-binding periplasmic protein UgpB	ugpB BAB2_0585	24.6728	24.7625	25.4889	25.1591	24.7788	25.1123	6	23.1678	22.6008	22.7545	22.7034	22.8254	23.0676	6	323.31	1519800000	271	+	+	2.14248	8.17811e-08
248	Q2YPD2	Urease accessory protein UreG 1	ureG1 BAB1_0303	22.687	23.3701	22.1632	22.4463	23.1485	22.8328	6	20.7153	20.3063	19.157	21.9227	20.1583	21.5082	6	120.95	176220000	69	+	+	2.14668	0.000695046
249	Q2YRK5	Malate synthase G (EC 2.3.3.9)	glcB BAB1_1663	23.4737	23.3357	23.7974	23.4202	22.8454	22.9582	6	20.7848	21.494	20.7917	21.1793	21.1999	21.2675	6	164.1	389790000	152	+	+	2.18556	3.1073e-07
250	Q2YRP7	Ribosome-recycling factor (RRF) (Ribosome-releasing factor)	frr BAB1_1181	26.2454	26.6068	26.2608	26.578	26.4629	26.191	6	24.0092	24.276	24.4602	24.1815	24.0372	23.8588	6	323.31	3781800000	560	+	+	2.25369	2.54107e-09
251	Q2YRH9	Response regulator receiver	BAB1_1671	23.9033	23.2921	24.0518	23.4414	22.4955	21.5125	6	20.8719	21.2926	20.4893	20.6682	20.9685	20.8036	6	52.191	446020000	59	+	+	2.26709	0.000236362
252	F2HUS3	S-(hydroxymethyl)glutathione dehydrogenase (EC 1.1.1.284)	BM28_A0140	24.5183	23.4666	24.9632	24.2679	23.3704	22.9831	6	21.2573	21.8878	21.273	21.4739	21.6501	22.0581	6	323.31	956920000	270	+	+	2.32823	4.57908e-05
253	F2HY41	Extracellular solute-binding protein	BM28_B0380	22.5442	20.9727	23.0859	20.8395	20.429	20.0395	6	18.4446	18.979	18.3838	18.748	19.3318	19.8831	6	275.56	164990000	69	+	+	2.35676	0.00157515
254	F2HU40	Uncharacterized protein	BM28_A0685	22.5252	23.8899	23.1294	23.2706	23.137	22.9787	6	21.4233	21.0696	20.4509	20.2906	21.1006	20.2991	6	20.067	238930000	55	+	+	2.38278	4.6802e-06
255	F2HWP3	Band 7 protein	BM28_B0077	22.7116	22.0763	21.2887	22.2227	21.3751	21.0361	6	18.9578	19.0025	18.7524	18.5886	18.646	19.4932	6	98.063	106660000	54	+	+	2.87831	2.16337e-06
256	F2HQL2	Allantoate amidohydrolase	BM28_A0309	23.251	24.1501	23.4941	23.783	23.7541	24.2763	6	20.0845	20.4376	21.0004	21.2465	21.0102	21.4652	6	126.25	660720000	201	+	+	2.91072	6.32673e-07
257	F2HSI8	Polysaccharide deacetylase	BM28_A0520	23.1919	24.2487	23.2816	23.7186	24.4725	23.7998	6	21.6974	21.1915	20.3363	20.7934	20.6554	20.3845	6	180.65	336140000	75	+	+	2.94243	1.75316e-06
258	Q2YNQ5	Uncharacterized protein	BAB1_0948	17.37	17.4999	18.9214	17.212	NaN	NaN	4	NaN	NaN	NaN	NaN	NaN	NaN	0	30.94	7080900	2	+	+	3.02722	0.0120446
259	F2HS78	Glyoxalase/bleomycin resistance protein/dioxygenase	BM28_A1890	23.3914	25.4149	23.7426	24.9675	24.6741	25.4431	6	21.433	21.8677	21.6829	21.7212	21.5495	21.1326	6	127.86	988810000	166	+	+	3.04113	8.68721e-06
260	F2HVN1	Glutaredoxin	BM28_A0844	24.6372	24.4633	25.0972	23.6539	24.0491	23.6375	6	21.82	20.7608	21.3342	21.0639	20.8884	21.3445	6	323.31	742960000	120	+	+	3.05443	8.06146e-07
261	F2HVI8	50S ribosomal protein L13	rplM BM28_A0801	17.3811	17.4834	18.5795	17.8066	NaN	NaN	4	NaN	NaN	NaN	NaN	NaN	NaN	0	10.321	4521400	3	+	+	3.06842	0.0109858
262	Q2YME4	Glycine--tRNA ligase alpha subunit (EC 6.1.1.14) (Glycyl-tRNA synthetase alpha subunit) (GlyRS)	glyQ BAB1_0431	18.0575	17.7255	18.3848	NaN	17.4247	NaN	4	NaN	NaN	NaN	NaN	NaN	NaN	0	9.5597	11449000	5	+	+	3.12542	0.0106037
263	Q2YM63	Ribosomal RNA small subunit methyltransferase H (EC 2.1.1.199) (16S rRNA m(4)C1402 methyltransferase) (rRNA (cytosine-N(4)-)-methyltransferase RsmH)	rsmH mraW BAB1_1458	18.5363	17.5727	NaN	18.1371	17.5696	NaN	4	NaN	NaN	NaN	NaN	NaN	NaN	0	19.124	6237000	8	+	+	3.16262	0.010731
264	F2HZV1	Alanine dehydrogenase/PNT domain-containing protein	BM28_B0947	23.5664	20.4683	23.9144	22.231	21.3402	20.5849	6	19.1296	17.9777	18.7509	18.6692	17.9204	19.8924	6	323.31	236660000	73	+	+	3.29418	0.000645358
265	Q2YKC1	Molybdenum cofactor biosynthesis protein	BAB2_0741	20.2446	18.8463	19.8094	18.7412	18.4127	18.2971	6	NaN	18.3074	18.3014	18.2087	NaN	NaN	3	87.49	24491000	19	+	+	3.31731	0.0182116
266	Q2YJA3	NifH/frxC family:ATPase, ParA type	BAB2_1163	18.0972	17.8625	19.0135	17.9905	NaN	NaN	4	NaN	NaN	NaN	NaN	NaN	NaN	0	145.9	8489300	5	+	+	3.35395	0.010793
267	Q2YMA4	Uncharacterized protein	BAB1_0399	18.047	17.8062	18.7188	18.4226	NaN	NaN	4	NaN	NaN	NaN	NaN	NaN	NaN	0	3.6158	11902000	3	+	+	3.35911	0.0105148
268	Q2YNC8	NADH-quinone oxidoreductase subunit B (EC 1.6.5.11) (NADH dehydrogenase I subunit B) (NDH-1 subunit B)	nuoB BAB1_0823	18.7208	18.3765	18.5557	18.7181	18.0316	18.0704	6	18.7341	NaN	NaN	18.5156	NaN	NaN	2	49.973	21069000	20	+	+	3.39723	0.0143555
269	Q2YLI6	ATP synthase gamma chain (ATP synthase F1 sector gamma subunit) (F-ATPase gamma subunit)	atpG BAB1_1808	18.8239	17.9768	18.6897	NaN	17.8625	NaN	4	NaN	NaN	NaN	NaN	NaN	NaN	0	28.035	14828000	14	+	+	3.41882	0.0106821
270	Q2YPD5	Urease subunit alpha 1 (EC 3.5.1.5) (Urea amidohydrolase subunit alpha 1)	ureC1 BAB1_0300	20.6916	20.7438	22.2263	21.6439	21.9316	19.9074	6	18.883	NaN	18.9487	18.7075	18.132	18.0181	5	56.542	70719000	35	+	+	3.54089	0.00450821
271	Q2YKX0	IolE protein KO: K03335 IolE protein	BAB2_0524	21.4041	19.1339	19.3773	19.2204	19.0233	18.7634	6	NaN	NaN	18.5779	NaN	18.5155	18.5828	3	25.663	30203000	9	+	+	3.6027	0.016899
272	F2HYL6	Bifunctional protein GlmU	glmU BM28_B0555	20.0566	18.7462	20.4114	19.8467	18.7518	18.7501	6	18.2832	NaN	NaN	18.363	NaN	18.5445	3	29.112	30879000	19	+	+	3.62367	0.0129872
273	Q2YIX5	Uncharacterized protein	BAB2_0388	23.7124	21.0177	23.8258	21.5074	21.2638	19.0038	6	18.1888	17.8999	17.7452	18.0848	17.4711	18.8994	6	186.29	169450000	46	+	+	3.67363	0.000745916
274	Q2YL14	Glutamate--cysteine ligase, plant (EC 6.3.2.2)	BAB2_0476	19.2528	18.0846	19.2294	18.9269	NaN	NaN	4	NaN	NaN	NaN	NaN	NaN	NaN	0	9.0713	15953000	9	+	+	3.7756	0.0106965
275	F2HYW0	Family 3 extracellular solute-binding protein	BM28_B0649	25.4666	25.7296	26.2389	25.9848	25.5125	25.8351	6	22.8257	22.5732	21.3917	21.26	22.5243	21.4134	6	323.31	2706300000	406	+	+	3.79651	2.79022e-07
276	F2HWB4	7-alpha-hydroxysteroid dehydrogenase	BM28_A1623	21.3798	18.874	21.0036	18.8941	18.7448	19.581	6	NaN	NaN	NaN	18.1709	18.4119	19.2254	3	100.69	46902000	33	+	+	3.83984	0.0146589
277	F2HZ74	Acyl-CoA dehydrogenase domain-containing protein	BM28_B0763	22.7409	21.8706	22.655	21.9793	22.138	21.5241	6	18.7263	NaN	19.272	19.8168	19.4602	19.2971	5	102.51	120770000	50	+	+	3.85426	0.00419566
278	Q2YLG1	Pyruvate carboxylase (EC 6.4.1.1)	pyc BAB1_1791	21.7059	20.477	22.9612	20.9526	20.6296	19.8393	6	20.5004	18.8936	19.279	NaN	NaN	18.3051	4	113.69	146290000	53	+	+	3.86127	0.0189037
279	Q2YQT7	Phosphate-specific transport system accessory protein PhoU	phoU BAB1_2145	18.9454	18.629	19.5972	18.8607	NaN	NaN	4	NaN	NaN	NaN	NaN	NaN	NaN	0	3.6159	18555000	5	+	+	3.86537	0.0104351
280	Q2YP60	ABC transporter substrate-binding protein KO: K02051 sulfonate/nitrate transport system substrate-binding protein	BAB1_0214	18.0869	18.4831	17.8543	19.0894	18.4967	18.9206	6	17.3199	NaN	NaN	NaN	NaN	17.5647	2	7.8468	9813900	9	+	+	3.86772	0.00173066
281	F2HUP7	Uncharacterized protein	BM28_A0114	24.5031	23.4644	24.7085	22.0087	23.0808	20.1183	6	19.314	19.1434	18.8828	19.0707	18.4077	19.0165	6	53.439	294580000	28	+	+	4.00812	0.000216408
282	Q2YL19	Glutamine synthetase, catalytic domain (EC 6.3.1.2)	BAB2_0471	21.2573	18.7829	21.9631	19.4428	19.1386	18.7641	6	18.212	18.7827	NaN	NaN	NaN	18.617	3	26.355	50873000	18	+	+	4.01787	0.0123162
283	F2HZ16	Substrate-binding region of ABC-type glycine betaine transport system	BM28_B0705	26.4736	27.6624	26.1794	27.3551	27.7723	27.9754	6	23.3457	23.1308	23.2693	23.157	23.4059	22.9585	6	323.31	6563300000	583	+	+	4.02517	1.33678e-07
284	Q2YQK5	Dynamin:ATP/GTP-binding site motif A (P-loop):Cobalamin synthesis protein/P47K	BAB1_1327	21.274	19.2639	21.7612	20.352	19.7742	19.0875	6	17.3233	NaN	NaN	17.2565	18.0003	18.0866	4	44.823	43824000	18	+	+	4.07098	0.00303654
285	F2HWI5	ATP-dependent zinc metalloprotease FtsH (EC 3.4.24.-)	ftsH BM28_A1694	20.7808	NaN	20.7554	18.2115	17.7834	NaN	4	NaN	NaN	NaN	NaN	NaN	NaN	0	6.2276	23054000	6	+	+	4.11519	0.0146567
286	Q2YKL9	Dihydroorotase (DHOase) (EC 3.5.2.3)	pyrC BAB2_0640	19.8601	18.9181	19.5589	19.287	19.0426	NaN	5	NaN	NaN	NaN	NaN	18.9049	NaN	1	21.558	33861000	17	+	+	4.15362	0.0141579
287	Q2YPM2	NAD binding site:UBA/THIF-type NAD/FAD binding fold:Aromatic-ring hydroxylase	BAB1_0004	18.3253	17.4976	19.9412	18.0852	17.7089	NaN	5	NaN	NaN	NaN	NaN	NaN	NaN	0	14.989	12583000	2	+	+	4.25138	0.000952989
288	Q2YJ02	Bacterial regulatory protein LacI, HTH motif:Periplasmic binding protein/LacI transcriptional regulator	BAB2_0250	19.4998	NaN	21.0119	19.4296	18.9201	NaN	4	NaN	NaN	NaN	NaN	NaN	NaN	0	4.5236	24227000	4	+	+	4.33689	0.0113275
289	Q2YK77	Peptide methionine sulfoxide reductase MsrB (EC 1.8.4.12) (Peptide-methionine (R)-S-oxide reductase)	msrB BAB2_0792	21.192	22.99	22.2173	22.1916	21.9166	22.0034	6	18.3147	17.5028	17.9803	17.6155	17.3218	17.4953	6	71.771	106480000	42	+	+	4.38012	2.40892e-08
290	F2HQL1	Phenylhydantoinase	hydA BM28_A0308	NaN	18.1928	17.9302	19.5169	18.4271	18.3202	5	NaN	NaN	NaN	NaN	NaN	NaN	0	26.908	46306000	30	+	+	4.38953	0.000674933
291	Q2YN10	Orotate phosphoribosyltransferase (OPRT) (OPRTase) (EC 2.4.2.10)	pyrE BAB1_0673	20.5374	19.233	20.511	NaN	19.0574	NaN	4	NaN	NaN	NaN	NaN	NaN	NaN	0	17.018	28587000	13	+	+	4.41648	0.0110286
292	Q2YNJ7	Beta-N-acetylhexosaminidase (EC 3.2.1.52)	BAB1_0898	20.0739	NaN	19.6415	20.2613	19.7937	19.337	5	NaN	19.1654	NaN	NaN	NaN	NaN	1	12.101	41161000	15	+	+	4.51701	0.0125965
293	Q2YJY3	Cytochrome c heme-binding site:4Fe-4S ferredoxin, iron-sulfur binding domain:Nitrate reductase, beta subunit (EC 1.7.99.4)	narH BAB2_0905	18.9872	18.4596	19.3357	18.5124	18.2598	NaN	5	NaN	NaN	NaN	NaN	NaN	NaN	0	13.677	11447000	5	+	+	4.58411	0.000600292
294	Q2YNA6	Uncharacterized protein	BAB1_0776	21.1928	21.1883	21.3222	20.5995	20.3616	20.4482	6	NaN	NaN	NaN	19.2361	18.9279	18.9866	3	145.38	64545000	38	+	+	4.72203	0.00499453
295	Q2YIM5	Antifreeze protein, type I:Pollen allergen Poa pIX/Phl pVI, C-terminal	pntAB BAB2_0262	18.3704	18.2397	21.4598	18.1839	18.5028	18.2228	6	NaN	17.9174	NaN	NaN	NaN	NaN	1	91.981	27520000	11	+	+	4.83533	0.000455647
296	Q2YKD8	ATPase, BadF/BadG/BcrA/BcrD type (EC 2.7.1.59)	BAB2_0724	23.2497	21.4147	23.2132	21.831	21.1588	21.6234	6	19.7774	NaN	18.6559	19.0991	NaN	19.3493	4	132.45	229530000	65	+	+	4.86484	0.00439889
297	F2HYM8	Aspartyl/glutamyl-tRNA(Asn/Gln) amidotransferase subunit C (Asp/Glu-ADT subunit C) (EC 6.3.5.-)	gatC BM28_B0567	20.2787	20.0018	NaN	21.0192	20.8395	NaN	4	NaN	NaN	NaN	NaN	NaN	NaN	0	9.518	38138000	17	+	+	4.88319	0.0103784
298	F2HVH1	Heavy metal translocating P-type ATPase	BM28_A0231	20.7145	NaN	21.4262	20.823	19.628	NaN	4	NaN	NaN	NaN	NaN	NaN	NaN	0	50.469	42512000	19	+	+	4.95862	0.010748
299	F2HYA4	Cupin domain protein	BM28_B0443	24.9079	26.4188	24.6595	25.6343	26.0823	25.9271	6	20.4937	20.9606	20.7217	20.5999	20.7922	20.2486	6	133.21	1168400000	188	+	+	4.96889	1.30449e-08
300	F2HYZ2	Rhizopine catabolism protein mocA	BM28_B0681	19.355	18.8529	19.9104	18.7834	NaN	18.9891	5	NaN	NaN	NaN	NaN	NaN	NaN	0	76.556	15969000	10	+	+	4.97346	0.000597086
301	F2HYE9	GntR family transcriptional regulator	BM28_B0488	20.0338	NaN	20.6526	18.76	18.341	18.1292	5	NaN	NaN	NaN	NaN	NaN	NaN	0	56.623	26392000	13	+	+	4.97778	0.00093043
302	Q2YNA1	Enoyl-CoA hydratase/isomerase (EC 4.2.1.17)	BAB1_0781	20.7871	NaN	22.1943	20.42	19.3807	NaN	4	NaN	NaN	NaN	NaN	NaN	NaN	0	43.205	69263000	14	+	+	4.99034	0.0116463
303	F2HZ71	Repressor protein C	BM28_B0760	19.2377	18.7278	20.3848	18.9878	18.8075	NaN	5	NaN	NaN	NaN	NaN	NaN	NaN	0	31.458	21004000	7	+	+	5.01594	0.000665815
304	F2HQN2	Uncharacterized protein	BM28_A0961	17.8732	18.669	18.0896	18.4794	17.861	18.4504	6	NaN	NaN	NaN	NaN	NaN	NaN	0	37.022	15964000	16	+	+	5.02709	6.57319e-12
305	Q2YPM1	Pyridine nucleotide-disulphide oxidoreductase, class I:D-isomer specific 2-hydroxyacid dehydrogenase, NAD binding domain	BAB1_0005	21.5883	20.1195	21.2974	19.6191	20.0708	NaN	5	NaN	NaN	NaN	NaN	NaN	19.0268	1	17.665	54844000	10	+	+	5.13806	0.00900877
306	F2HV64	Uncharacterized protein	BM28_A1458	18.5698	20.2049	NaN	19.3453	19.5	19.4148	5	NaN	NaN	NaN	NaN	NaN	NaN	0	10.036	13915000	13	+	+	5.16414	0.000625198
307	Q2YPW3	Histidine kinase (EC 2.7.13.3)	BAB1_1141	20.2452	18.9982	19.9854	19.1404	18.8319	NaN	5	NaN	NaN	NaN	NaN	NaN	NaN	0	14.452	21002000	7	+	+	5.19183	0.000641284
308	F2HST4	50S ribosomal protein L23	rplW BM28_A1242	19.4394	19.4951	18.6249	19.8671	19.9339	NaN	5	NaN	NaN	NaN	NaN	NaN	NaN	0	74.042	48305000	27	+	+	5.2184	0.000605998
309	Q2YMW1	Uncharacterized protein	BAB1_0650	21.1971	22.7896	21.1437	22.226	22.9987	21.6618	6	17.4586	NaN	16.5367	17.0914	17.9813	18.0699	5	189.03	283940000	74	+	+	5.27817	6.65825e-05
310	Q2YLZ2	UDP-3-O-[3-hydroxymyristoyl] N-acetylglucosamine deacetylase (EC 3.5.1.-) (UDP-3-O-acyl-GlcNAc deacetylase)	lpxC BAB1_1443	18.6686	18.3813	18.8406	18.2905	18.7226	18.6179	6	NaN	NaN	NaN	NaN	NaN	NaN	0	30.983	17849000	6	+	+	5.37691	2.57572e-14
311	F2HV10	SmpA/OmlA domain-containing protein	BM28_A0781	21.571	21.9472	NaN	NaN	20.4394	21.4062	4	NaN	NaN	NaN	NaN	NaN	NaN	0	7.9341	68228000	23	+	+	5.42063	0.0105046
312	Q2YKX1	IolB protein KO: K03337 IolB protein	BAB2_0523	19.9035	20.9881	19.6494	19.4528	19.306	19.3167	6	NaN	NaN	NaN	NaN	NaN	19.3494	1	10.077	24896000	8	+	+	5.53617	0.000377118
313	Q2YLD7	DEAD/DEAH box helicase:Helicase, C-terminal:ATP/GTP-binding site motif A (P-loop):Aldehyde dehydrogenase	BAB1_1781	20.5077	NaN	20.2516	20.3791	19.6664	19.2752	5	NaN	NaN	NaN	NaN	NaN	NaN	0	41.144	36031000	17	+	+	5.67168	0.000595729
314	Q2YMM2	5-hydroxyisourate hydrolase (HIU hydrolase) (HIUHase) (EC 3.5.2.17)	BAB1_0532	20.1951	20.4292	20.6655	19.6647	19.8495	19.5296	6	19.4196	NaN	NaN	NaN	NaN	NaN	1	47.421	56991000	30	+	+	5.81065	0.000251418
315	F2HZ79	Acyl-CoA dehydrogenase	BM28_B0768	24.4871	20.9168	24.231	22.1193	21.1433	19.6227	6	18.1222	NaN	16.492	18.4418	NaN	18.0346	4	171.02	245110000	54	+	+	5.83493	0.00101316
316	F2HYG8	Binding-protein-dependent transport systems inner membrane component	BM28_B0507	22.4171	NaN	22.2724	21.6767	21.8926	NaN	4	NaN	NaN	NaN	NaN	NaN	NaN	0	27.457	209540000	19	+	+	5.90314	0.0102101
317	Q2YIM4	NAD(P) transhydrogenase subunit beta (EC 1.6.1.2) (Nicotinamide nucleotide transhydrogenase subunit beta)	pntB BAB2_0263	20.614	18.0961	19.1242	20.8146	18.2228	18.0039	6	NaN	NaN	NaN	NaN	NaN	NaN	0	7.0145	20963000	12	+	+	5.93592	4.90363e-07
318	F2HWQ3	Keto-hydroxyglutarate-aldolase/keto-deoxy-phosphogluconate aldolase	BM28_B0087	18.8925	19.5844	19.8328	19.3762	19.0293	18.8823	6	NaN	NaN	NaN	NaN	NaN	NaN	0	29.966	21456000	13	+	+	6.05624	4.1982e-12
319	Q2YQP7	Enoyl-CoA hydratase/isomerase (EC 4.2.1.17)	BAB1_2185	21.5572	19.5852	21.4987	19.871	19.9591	NaN	5	NaN	NaN	NaN	NaN	NaN	NaN	0	43.343	83337000	31	+	+	6.07019	0.000717035
320	Q2YNC4	K(+)-insensitive pyrophosphate-energized proton pump (EC 3.6.1.1) (Membrane-bound proton-translocating pyrophosphatase) (Pyrophosphate-energized inorganic pyrophosphatase)	hppA BAB1_0793	22.6689	22.1735	23.0619	22.5369	21.5176	20.2393	6	16.9944	17.357	17.4579	NaN	NaN	17.4987	4	221.51	165340000	50	+	+	6.07837	8.97465e-05
321	F2HSV2	Cysteine synthase A	cysK BM28_A1955	21.1005	19.6857	21.2041	21.1956	19.3749	NaN	5	NaN	NaN	NaN	NaN	NaN	NaN	0	151.41	107300000	36	+	+	6.08511	0.000696282
322	Q2YL87	Bacterial regulatory protein, GntR family	BAB2_0022	20.963	19.0229	21.1391	21.174	19.1673	19.1389	6	NaN	NaN	NaN	NaN	17.9204	NaN	1	21.73	76568000	14	+	+	6.10578	4.93565e-05
323	Q2YR93	Uncharacterized protein	BAB1_1976	22.3682	21.8331	22.7371	NaN	22.7263	23.1406	5	NaN	NaN	NaN	22.2511	NaN	NaN	1	25.984	257270000	19	+	+	6.28569	0.0161162
324	Q2YPD7	Urease subunit gamma 1 (EC 3.5.1.5) (Urea amidohydrolase subunit gamma 1)	ureA1 ureA ureA-1 BAB1_0298	21.5785	22.431	21.9289	22.4299	22.6483	22.68	6	18.3906	18.7353	NaN	NaN	19.1229	NaN	3	44.108	101450000	34	+	+	6.30296	0.000520186
325	F2HXV5	Nitrate reductase subunit alpha	narG BM28_B0294	21.8663	20.2018	21.1761	20.3426	19.7479	19.322	6	NaN	NaN	NaN	NaN	NaN	18.7783	1	58.722	50756000	22	+	+	6.30472	9.10886e-05
326	F2HTJ0	ABC transporter periplasmic substrate-binding protein	BM28_A2038	20.8006	20.6003	NaN	21.0113	20.9788	21.1719	5	NaN	NaN	NaN	NaN	NaN	NaN	0	57.37	94878000	21	+	+	6.41882	0.000545036
327	F2HR03	ABC transporter-like protein	BM28_A1782	20.2618	19.4007	20.1362	20.2412	19.0458	19.1686	6	NaN	NaN	NaN	NaN	NaN	NaN	0	46.731	33922000	19	+	+	6.49906	7.4162e-11
328	Q2YPK6	Uncharacterized protein BAB1_0366	BAB1_0366	19.0201	20.3903	18.4032	20.0922	20.2044	20.4639	6	NaN	NaN	NaN	NaN	NaN	NaN	0	15.2	25924000	21	+	+	6.55236	3.64468e-09
329	F2HR00	Leu/Ile/Val-binding protein	BM28_A1779	22.9404	23.4349	22.2831	NaN	23.456	23.442	5	NaN	NaN	22.9932	NaN	NaN	NaN	1	66.792	349110000	50	+	+	6.62054	0.0174104
330	Q2YRW5	NADPH-dependent 7-cyano-7-deazaguanine reductase (EC 1.7.1.13) (7-cyano-7-carbaguanine reductase) (NADPH-dependent nitrile oxidoreductase) (PreQ(0) reductase)	queF BAB1_1206	21.2578	20.7341	21.5233	21.0029	20.6031	19.9468	6	NaN	NaN	NaN	NaN	NaN	17.7363	1	68.481	75266000	42	+	+	6.88027	5.40102e-06
331	Q2YPS8	Electron transport protein SCO1/SenC	BAB1_1435	21.0445	20.0311	20.7899	19.7876	20.0201	19.3027	6	NaN	NaN	NaN	NaN	NaN	NaN	0	96.207	34177000	15	+	+	6.95267	1.42934e-10
332	F2HS19	Acetyltransferase component of pyruvate dehydrogenase complex (EC 2.3.1.12)	BM28_A1135	20.4624	20.1987	20.2576	20.4243	20.1446	19.9989	6	NaN	NaN	NaN	NaN	NaN	NaN	0	19.295	34917000	26	+	+	7.03776	2.22045e-16
333	F2HWF0	RNA polymerase sigma factor	BM28_A1659	20.862	19.6197	21.6357	20.1323	19.8691	19.4733	6	NaN	NaN	NaN	NaN	NaN	NaN	0	61.038	52244000	13	+	+	7.05534	1.46439e-09
334	Q2YNM5	5'-nucleotidase SurE (EC 3.1.3.5) (Nucleoside 5'-monophosphate phosphohydrolase)	surE BAB1_0905	20.4846	20.6123	20.4982	20.1024	20.2653	19.8329	6	NaN	NaN	NaN	NaN	NaN	NaN	0	57.953	47324000	30	+	+	7.08931	4.55191e-14
335	Q2YPF2	Arginine/ornithine transport operon protein aot	BAB1_0317	21.8147	19.5285	21.4953	19.8788	19.7791	19.8893	6	NaN	NaN	NaN	NaN	NaN	NaN	0	22.966	54290000	25	+	+	7.1876	6.59804e-09
336	F2HVQ0	Uncharacterized protein	BM28_A0863	21.1675	19.9916	22.1173	20.2067	20.121	19.9769	6	NaN	NaN	NaN	NaN	NaN	NaN	0	116.72	50978000	23	+	+	7.38682	1.43043e-09
337	F2HZ20	Alanine racemase domain-containing protein	BM28_B0709	20.0804	21.5045	19.3631	20.7735	20.9393	21.4727	6	NaN	NaN	NaN	NaN	NaN	NaN	0	7.9104	43172000	17	+	+	7.47894	8.56055e-10
338	F2HU33	Dihydroorotase (DHOase) (EC 3.5.2.3)	pyrC BM28_A0678	19.7533	21.7852	19.9242	20.4716	21.0863	21.3768	6	NaN	NaN	NaN	NaN	NaN	NaN	0	24.498	54645000	13	+	+	7.52289	6.52045e-10
339	F2HY58	Outer membrane protein Omp31	BM28_B0397	25.4987	26.6698	25.1001	25.9074	26.5693	26.4926	6	18.7088	17.301	18.4265	19.1104	18.601	18.0388	6	323.31	1275000000	158	+	+	7.67525	1.39764e-09
340	Q2YKA8	Glyoxalase/Bleomycin resistance protein/dioxygenase domain	BAB2_0756	21.2766	21.0343	22.2756	21.2044	20.0006	19.9068	6	NaN	NaN	NaN	NaN	NaN	NaN	0	87.64	61676000	20	+	+	7.7397	1.10814e-09
341	F2HSQ5	OmpA/MotB domain-containing protein	BM28_A1213	21.1046	21.1166	20.7415	21.0427	21.0479	20.6624	6	NaN	NaN	NaN	NaN	NaN	NaN	0	204.98	55059000	25	+	+	7.74261	4.44089e-16
342	F2HU70	Bifunctional preprotein translocase subunit SecD/SecF	BM28_A1337	21.5327	20.2792	22.362	21.4987	20.3493	19.924	6	NaN	NaN	NaN	NaN	NaN	NaN	0	185.73	107390000	35	+	+	7.78099	2.02616e-09
343	F2HRJ5	30S ribosomal protein S16	rpsP BM28_A1817	20.3309	20.681	21.0427	21.6476	21.7469	20.675	6	NaN	NaN	NaN	NaN	NaN	NaN	0	124.07	50028000	16	+	+	7.81068	1.33078e-11
344	F2HSF2	Peptidase U62	BM28_A0484	20.9225	21.4106	21.0181	21.154	20.8689	20.7731	6	NaN	NaN	NaN	NaN	NaN	NaN	0	181.81	72669000	52	+	+	7.81456	1.55431e-15
345	Q2YM50	Purine nucleoside permease	BAB1_1563	21.9929	20.8355	21.849	21.2753	20.4078	20.5082	6	NaN	NaN	NaN	NaN	NaN	NaN	0	52.396	73302000	22	+	+	7.9348	5.92197e-11
346	F2HT23	Uncharacterized protein	BM28_A2026	20.9304	22.1115	20.2563	20.8776	21.7655	21.0833	6	NaN	NaN	NaN	NaN	NaN	NaN	0	135.42	43979000	23	+	+	7.96076	5.13671e-11
347	Q2YMI9	Cytochrome c oxidase subunit 2 (EC 1.9.3.1)	BAB1_0492	21.4334	20.944	22.1495	21.246	20.8171	20.6871	6	NaN	NaN	NaN	NaN	NaN	NaN	0	138.59	100640000	19	+	+	8.00284	5.47518e-12
348	F2HXS9	Pollen allergen Poa pIX/Phl pVI, C-terminal protein	BM28_B1176	20.7522	22.6688	20.2874	21.0918	21.4801	21.156	6	NaN	NaN	NaN	NaN	NaN	NaN	0	76.115	59860000	31	+	+	8.02937	3.16427e-10
349	F2HZG8	Pentapeptide MXKDX repeat protein	BM28_B0021	26.1817	26.4907	25.4862	26.925	26.6301	26.7145	6	21.353	20.29	NaN	NaN	20.5396	20.3553	4	88.187	2322400000	88	+	+	8.24503	0.000403609
350	F2HW76	Choline ABC transporter periplasmic binding protein	choX BM28_A1585	21.434	21.8709	21.5844	21.6511	21.2835	21.2293	6	NaN	NaN	NaN	NaN	NaN	NaN	0	10.659	61323000	13	+	+	8.29886	1.33227e-15
351	Q2YJB6	Putative binding protein BAB2_1146	BAB2_1146	22.2473	21.7184	21.8771	22.275	21.398	21.105	6	NaN	NaN	NaN	NaN	NaN	NaN	0	65.644	115960000	60	+	+	8.56015	6.81233e-13
352	F2HTW8	Glyoxalase/bleomycin resistance protein/dioxygenase	BM28_A0058	21.4198	22.7098	20.9635	21.9687	22.4312	22.438	6	NaN	NaN	NaN	NaN	NaN	NaN	0	68.704	104510000	37	+	+	8.7785	2.25575e-11
353	F2HQQ4	Porin	BM28_A0983	23.8099	25.1615	23.6561	24.9949	25.5355	25.4169	6	NaN	NaN	NaN	20.2407	NaN	22.8136	2	323.31	960710000	137	+	+	8.78009	0.000686226
354	F2HT47	Addiction module antidote	BM28_A0571	21.8501	21.9812	21.8085	22.2003	22.6914	22.4554	6	NaN	NaN	NaN	NaN	NaN	NaN	0	194.65	109400000	47	+	+	8.95447	2.81997e-14
355	F2HST9	Elongation factor G (EF-G)	fusA BM28_A1247	22.8727	21.9002	23.1926	22.3395	21.6306	21.2255	6	NaN	NaN	NaN	NaN	NaN	NaN	0	29.817	153100000	22	+	+	8.98351	5.00797e-11
356	F2HSB5	Uncharacterized protein	BM28_A1927	21.6055	22.806	21.6433	22.1278	22.5525	22.43	6	NaN	NaN	NaN	NaN	NaN	NaN	0	36.937	127590000	29	+	+	8.98419	7.57838e-13
357	F2HRF2	Zinc-binding alcohol dehydrogenase family protein	BM28_A1071	21.7605	23.416	20.9322	21.8823	22.5871	22.5922	6	NaN	NaN	NaN	NaN	NaN	NaN	0	28.769	106450000	35	+	+	8.98504	1.86851e-10
358	F2HYX7	Family 1 extracellular solute-binding protein	BM28_B0666	23.3758	23.3889	24.1224	23.1406	23.2946	22.911	6	NaN	NaN	NaN	NaN	19.5415	NaN	1	222.26	289950000	73	+	+	9.10698	6.72456e-06
359	F2HRJ9	Carbonic anhydrase (EC 4.2.1.1)	BM28_A1821	22.9806	22.5151	23.4973	22.8243	22.0873	21.3407	6	NaN	NaN	NaN	NaN	NaN	NaN	0	90.843	185310000	60	+	+	9.33086	3.5302e-11
360	F2HW09	Serine--tRNA ligase (EC 6.1.1.11) (Seryl-tRNA synthetase) (Seryl-tRNA(Ser/Sec) synthetase)	serS BM28_A0892	21.8051	22.9761	22.1463	23.0879	23.1813	22.6734	6	NaN	NaN	NaN	NaN	NaN	NaN	0	48.876	177940000	42	+	+	9.435	1.56963e-12
361	F2HS50	Ribosome-recycling factor (RRF) (Ribosome-releasing factor)	frr BM28_A1166	22.7944	23.0639	22.8322	23.1748	22.526	21.9105	6	NaN	NaN	NaN	NaN	NaN	NaN	0	8.1814	251690000	29	+	+	9.50698	1.96954e-13
362	F2HYW9	Putative sugar-binding periplasmic protein	BM28_B0658	23.7071	21.8617	23.0918	23.4246	22.346	22.7689	6	NaN	NaN	NaN	NaN	NaN	NaN	0	35.606	653440000	48	+	+	9.65669	1.00959e-11
363	F2HVI7	30S ribosomal protein S9	rpsI BM28_A0800	22.4178	23.1882	22.0441	23.2321	23.2907	23.0934	6	NaN	NaN	NaN	NaN	NaN	NaN	0	61.918	274600000	45	+	+	9.66772	6.12843e-13
364	F2HTS3	Extracellular ligand-binding receptor	BM28_A0013	22.9033	22.8147	23.2514	23.0124	22.9955	22.9964	6	NaN	NaN	NaN	NaN	NaN	NaN	0	323.31	414260000	142	+	+	9.78561	0
365	F2HUK3	Leucine aminopeptidase 2, chloroplastic (EC 3.4.11.-) (EC 3.4.11.1) (Leucine aminopeptidase 3, chloroplastic)	BM28_A2169	22.6935	23.6882	22.6492	23.3601	23.2271	22.9581	6	NaN	NaN	NaN	NaN	NaN	NaN	0	154.04	239300000	107	+	+	9.88605	4.10783e-14
366	F2HZD4	Rhizopine-binding protein	BM28_B0823	22.9851	24.2311	22.9139	22.9547	23.7725	23.7069	6	NaN	NaN	NaN	NaN	NaN	NaN	0	75.616	310300000	34	+	+	10.2174	6.60805e-13
367	F2HQM5	Uncharacterized protein	BM28_A0954	22.6355	24.4779	22.412	23.1862	24.1674	23.9946	6	NaN	NaN	NaN	NaN	NaN	NaN	0	86.722	306430000	58	+	+	10.269	4.92677e-11
368	F2HZ84	Nickel ABC transporter periplasmic nickel-binding protein	nikA BM28_B0773	23.7172	23.6739	24.0243	23.3893	23.4107	23.077	6	NaN	NaN	NaN	NaN	NaN	NaN	0	276.05	299730000	98	+	+	10.3387	3.33067e-15
369	F2HU12	4-hydroxy-tetrahydrodipicolinate synthase (HTPA synthase) (EC 4.3.3.7)	dapA BM28_A0657	23.243	24.1325	22.7625	23.8803	23.204	24.1237	6	NaN	NaN	NaN	NaN	NaN	NaN	0	30.151	213240000	18	+	+	10.3477	7.63611e-13
370	Q2YKE7	Biotin/lipoyl attachment:Catalytic domain of components of various dehydrogenase complexes:2-oxo acid dehydrogenase, acyltran (EC 2.3.1.12)	BAB2_0713	24.3288	22.6429	25.3048	23.8759	22.9861	22.264	6	NaN	NaN	NaN	NaN	NaN	NaN	0	274.19	671350000	141	+	+	10.3571	8.0449e-10
371	F2HS24	Enolase (EC 4.2.1.11) (2-phospho-D-glycerate hydro-lyase) (2-phosphoglycerate dehydratase)	eno BM28_A1140	23.6655	23.4545	23.3632	23.6885	24.502	24.4919	6	NaN	NaN	NaN	NaN	NaN	NaN	0	141.98	425020000	44	+	+	10.6509	1.89182e-13
372	F2HU77	Sulfate ABC transporter sulfate-binding protein	BM28_A1344	22.8322	24.1029	24.3509	24.298	24.0969	23.7818	6	NaN	NaN	NaN	NaN	NaN	NaN	0	309.26	332880000	40	+	+	10.7004	5.20473e-13
373	Q2YKP7	Twin-arginine translocation pathway signal	BAB2_0607	23.7517	25.0503	22.8314	24.2076	24.9228	23.4349	6	NaN	NaN	NaN	NaN	NaN	NaN	0	22.182	381230000	17	+	+	10.8231	3.19094e-11
374	F2HUG9	DNA starvation/stationary phase protection protein Dps	BM28_A2135	25.112	27.1476	24.6624	25.4786	26.5169	26.4175	6	19.1641	NaN	NaN	NaN	NaN	NaN	1	302.09	1089900000	47	+	+	11.6868	6.78798e-07
375	F2HVF2	EPTC-inducible aldehyde dehydrogenase	BM28_A0212	26.0025	24.4636	26.9474	26.1265	24.4259	23.9422	6	NaN	NaN	NaN	NaN	NaN	NaN	0	323.31	1615400000	158	+	+	12.108	2.67836e-10
376	F2HWU1	Endoribonuclease L-PSP	BM28_B0998	24.7996	25.6146	24.2994	25.433	26.1882	26.5139	6	NaN	NaN	NaN	NaN	NaN	NaN	0	212.62	1826400000	182	+	+	12.2648	6.18305e-12
377	Q2YKU9	Bacterial extracellular solute-binding protein, family 1	BAB2_0547	25.4653	25.5139	26.4192	26.3277	25.3846	25.6063	6	NaN	NaN	NaN	NaN	NaN	NaN	0	323.31	6210500000	593	+	+	12.5762	1.37668e-14
378	F2HXW3	Uncharacterized protein	BM28_B0302	25.589	26.55	24.8845	25.7808	26.4911	26.3694	6	NaN	NaN	NaN	NaN	NaN	NaN	0	147.83	1475400000	138	+	+	12.7341	3.81695e-13
379	F2HYR5	Amidohydrolase 3	BM28_B0604	27.3639	28.8067	26.1061	27.2783	28.5745	28.6151	6	15.0696	13.5111	NaN	NaN	NaN	NaN	2	323.31	4380900000	333	+	+	14.2207	1.1616e-10

## Sheet: B. abortus
Supplementary Table 1C: List of Proteins identified to be relatively abundent in B. abortus : Yellow highlighted indicates the proteins identified only in case of B. abortus.
S.No	Uniprot ID	Protein name/ Description	Gene name	Log2 normalised label free quantification intensities														T-test Significant	False Discovery Rate (FDR)	Score	Intensity	MS/MS Count	.-Log t-test p value	t-test Difference	t-test p value
				B. melitensis 09RB5232 (M)							B. abortus 09RB5689 (A)
				Expt. 1	Expt. 2	Expt. 3	Expt. 4	Expt. 5	Expt. 6	Count	Expt. 7	Expt. 8	Expt. 9	Expt. 10	Expt. 11	Expt. 12	Count
1	Q2YP89	ATP/GTP-binding site motif A (P-loop):Fumarylacetoacetate (FAA) hydrolase (EC 4.1.1.-)	BAB1_0247	NaN	NaN	NaN	NaN	NaN	NaN	0	26.1896	24.322	25.9598	25.9714	26.0285	25.5474	6	+	+	41.772	1430200000	32	12.0537	-12.4598	8.83598e-13
2	Q2YKI4	Ferroxidase (EC 1.16.3.1)	bfr BAB2_0675	NaN	NaN	NaN	NaN	NaN	NaN	0	25.6926	24.5034	25.4575	25.41	25.4958	25.1753	6	+	+	61.898	730990000	73	14.0994	-12.0791	7.95406e-15
3	F2HUP5	Formate/nitrite transporter	BM28_A0112	NaN	NaN	NaN	NaN	NaN	NaN	0	24.6844	23.9086	25.0128	25.0503	25.2196	24.7533	6	+	+	180.55	682540000	122	13.4442	-11.5615	3.59567e-14
4	F2HX75	Zinc protease	BM28_B0201	NaN	NaN	NaN	NaN	NaN	NaN	0	24.8379	24.6959	24.5413	24.5311	24.6904	24.4679	6	+	+	215.77	592660000	176	18.6793	-11.4174	2.0925e-19
5	Q2YIL8	Urocanate hydratase (Urocanase) (EC 4.2.1.49) (Imidazolonepropionate hydrolase)	hutU BAB2_0303	NaN	NaN	NaN	NaN	NaN	NaN	0	24.1446	24.4797	24.5919	24.6669	24.6259	24.2453	6	+	+	279.2	686180000	164	16.6637	-11.2491	2.16917e-17
6	Q2YK12	Uncharacterized protein	BAB2_0868	NaN	NaN	NaN	NaN	NaN	NaN	0	24.1381	24.1399	24.0508	23.9408	23.8277	24.1178	6	+	+	157.42	311890000	81	18.8085	-10.8259	1.55413e-19
7	Q2YPS1	Esterase/lipase/thioesterase, active site	BAB1_0058	NaN	NaN	NaN	NaN	NaN	NaN	0	23.9694	24.0513	23.9462	24.1696	23.9738	23.7524	6	+	+	248.48	296270000	78	18.4481	-10.7671	3.56358e-19
8	Q2YQ61	Uncharacterized protein	BAB1_1029	NaN	NaN	NaN	NaN	NaN	NaN	0	23.5776	23.2888	23.252	23.6442	23.0735	23.1791	6	+	+	151.38	285790000	91	16.0078	-10.1259	9.82124e-17
9	Q2YP75	Uncharacterized protein	BAB1_0227	NaN	NaN	NaN	NaN	NaN	NaN	0	23.4206	22.9479	22.871	23.4893	22.9909	23.0467	6	+	+	97.665	154310000	56	15.3029	-9.91773	4.9782e-16
10	Q2YKP4	Solute-binding protein/glutamate receptor:Ionotropic glutamate receptor:Bacterial extracellular solute-binding protein, family 3	BAB2_0612	NaN	NaN	NaN	NaN	NaN	NaN	0	22.3161	22.3338	22.41	22.3701	22.5368	22.5378	6	+	+	217.77	187840000	88	19.2176	-9.20744	6.05961e-20
11	Q2YPK5	Invasion protein B homolog BAB1_0368	BAB1_0368	NaN	NaN	NaN	NaN	NaN	NaN	0	22.3135	21.8213	21.9795	21.7676	22.889	23.5607	6	+	+	7.904	117010000	21	10.6481	-9.17859	2.2484e-11
12	Q2YNJ4	Uncharacterized protein	BAB1_0863	NaN	NaN	NaN	NaN	NaN	NaN	0	22.6842	21.1097	22.7121	22.6457	22.9269	21.9629	6	+	+	24.691	138320000	30	10.7621	-9.13026	1.72939e-11
13	F2HZQ1	Imidazolonepropionase (EC 3.5.2.7)	hutI BM28_B0897	NaN	NaN	NaN	NaN	NaN	NaN	0	21.7278	22.3357	22.2616	22.1465	22.0961	22.2078	6	+	+	115.31	121040000	59	15.7016	-8.91927	1.98803e-16
14	Q2YQG1	Bacterial transferase hexapeptide repeat	BAB1_1279	NaN	NaN	NaN	NaN	NaN	NaN	0	21.0845	22.1669	22.4484	22.8763	22.5359	21.3548	6	+	+	73.44	158310000	52	10.5021	-8.8678	3.14723e-11
15	Q2YKW2	Alkyl hydroperoxide reductase AhpD (EC 1.11.1.15) (Alkylhydroperoxidase AhpD)	ahpD BAB2_0532	NaN	NaN	NaN	NaN	NaN	NaN	0	22.3778	21.724	21.4622	22.0895	21.5886	22.9014	6	+	+	323.31	229880000	106	11.5865	-8.81391	2.59108e-12
16	Q2YJ21	Dihydroxy-acid and 6-phosphogluconate dehydratase:ATP/GTP-binding site motif A (P-loop) (EC 4.2.1.6)	BAB2_0294	NaN	NaN	NaN	NaN	NaN	NaN	0	21.5329	22.0065	21.8441	21.4756	21.7296	21.965	6	+	+	302.83	186540000	93	15.3855	-8.54893	4.1164e-16
17	Q2YQQ6	Glutelin:Lipoprotein YaeC family:NLPA lipoprotein	BAB1_2176	NaN	NaN	NaN	NaN	NaN	NaN	0	21.6888	21.9562	21.7607	21.9511	21.3998	21.7468	6	+	+	129.37	197420000	70	15.7061	-8.54056	1.96755e-16
18	Q2YJU8	Multicopper oxidase, type 1:Copper-containing nitrite reductase:Twin-arginine translocation pathway signal (EC 1.7.2.1)	BAB2_0943	NaN	NaN	NaN	NaN	NaN	NaN	0	22.3427	19.9815	23.6829	21.3449	22.5661	20.5489	6	+	+	181.62	307340000	60	7.50508	-8.5345	3.12548e-08
19	Q2YKW3	Alkyl hydroperoxide reductase/ Thiol specific antioxidant/ Mal allergen (EC 1.8.1.-)	ahpC BAB2_0531	NaN	NaN	NaN	NaN	NaN	NaN	0	21.9576	21.6492	21.8033	21.3059	21.7593	21.8118	6	+	+	61.112	101470000	43	15.3068	-8.5045	4.93373e-16
20	Q2YJW2	Nitrous-oxide reductase (EC 1.7.2.4) (N(2)OR) (N2O reductase)	nosZ BAB2_0928	NaN	NaN	NaN	NaN	NaN	NaN	0	22.2562	20.1039	22.9851	20.6412	22.1287	20.4179	6	+	+	113.64	201660000	106	7.98317	-8.21218	1.0395e-08
21	Q2YQB9	Short-chain dehydrogenase/reductase SDR:Glucose/ribitol dehydrogenase	BAB1_1647	NaN	NaN	NaN	NaN	NaN	NaN	0	21.3707	21.3085	21.0107	21.5766	21.2492	21.9022	6	+	+	323.31	114050000	56	13.7875	-8.19298	1.63112e-14
22	Q2YQC2	OmpA-like transmembrane domain	omp31-1 BAB1_1639	NaN	NaN	NaN	NaN	NaN	NaN	0	21.3262	20.5188	21.4591	21.3039	21.6623	21.2855	6	+	+	102.29	57236000	34	12.6622	-8.04931	2.17685e-13
23	Q2YPR0	Uncharacterized protein	BAB1_0069	NaN	NaN	NaN	NaN	NaN	NaN	0	21.7849	20.9774	20.9864	21.0757	21.3808	20.1642	6	+	+	136.09	36886000	25	11.1628	-7.85158	6.87448e-12
24	Q2YQZ0	Imidazole glycerol phosphate synthase subunit HisH (EC 2.4.2.-) (IGP synthase glutamine amidotransferase subunit) (IGP synthase subunit HisH) (ImGP synthase subunit HisH) (IGPS subunit HisH)	hisH BAB1_2084	NaN	NaN	NaN	NaN	NaN	NaN	0	21.2529	20.7072	21.0796	21.0856	21.1077	20.8718	6	+	+	42.688	66571000	30	15.5327	-7.80748	2.93266e-16
25	Q2YIL6	Histidine ammonia-lyase (Histidase) (EC 4.3.1.3)	hutH BAB2_0305	NaN	NaN	NaN	NaN	NaN	NaN	0	20.6113	21.1031	21.1981	20.989	20.7949	20.9889	6	+	+	53.828	56317000	28	15.1046	-7.73755	7.85872e-16
26	Q2YJ23	Sugar transporter	BAB2_0292	NaN	NaN	NaN	NaN	NaN	NaN	0	20.6224	21.1387	20.6907	20.7234	20.6937	20.5536	6	+	+	13.9	69402000	16	15.1279	-7.52709	7.44869e-16
27	Q2YLF3	4-hydroxyproline epimerase (EC 5.1.1.8) (Hydroxyproline-2-epimerase) (HyPRE)	prpA BAB1_1800	NaN	NaN	NaN	NaN	NaN	NaN	0	20.5604	20.0726	20.5387	20.4976	20.4154	20.3846	6	+	+	93.246	122540000	42	15.5322	-7.20154	2.93627e-16
28	Q2YPE0	Uncharacterized protein	BAB1_0295	NaN	NaN	NaN	NaN	NaN	NaN	0	20.4561	20.3282	20.0124	20.1897	20.5863	20.5973	6	+	+	45.989	41864000	31	14.4044	-7.15166	3.94115e-15
29	Q2YRH4	Brucella melitensis biovar Abortus 2308 chromosome I, complete sequence, strain 2308	BAB1_1676	NaN	NaN	NaN	NaN	NaN	NaN	0	20.3784	19.6806	20.7476	20.1749	20.3106	20.2917	6	+	+	63.431	30253000	13	12.6027	-7.05394	2.49638e-13
30	Q2YPL1	Enoyl-CoA hydratase/isomerase (EC 4.2.1.17)	BAB1_0016	NaN	NaN	NaN	NaN	NaN	NaN	0	21.6063	21.1854	NaN	21.4822	20.4721	22.1024	5	+	+	27.737	52700000	14	3.22874	-6.79972	0.000590548
31	Q2YIG4	ATP/GTP-binding site motif A (P-loop):Ornithine cyclodeaminase/mu-crystallin (EC 4.3.1.12)	BAB2_0338	NaN	NaN	NaN	NaN	NaN	NaN	0	19.8683	19.5938	19.8015	19.9317	20.3204	20.5168	6	+	+	91.209	44354000	26	12.4492	-6.79542	3.55458e-13
32	Q2YJ35	Putative nickel-responsive regulator	BAB2_0432	NaN	NaN	NaN	NaN	NaN	NaN	0	19.5859	19.749	19.6703	19.5344	19.5632	19.5745	6	+	+	3.9483	23249000	6	18.488	-6.40289	3.25122e-19
33	Q2YKR4	Renal dipeptidase (EC 3.4.13.19)	BAB2_0586	NaN	NaN	NaN	NaN	NaN	NaN	0	19.1108	19.5872	19.2989	19.1875	19.4753	19.2432	6	+	+	8.4894	22253000	14	14.7934	-6.10715	1.6091e-15
34	Q2YN28	Uncharacterized protein	BAB1_0691	NaN	NaN	NaN	NaN	NaN	NaN	0	19.0964	19.0849	19.4171	19.2906	19.1449	19.1812	6	+	+	5.2052	15727000	8	16.1852	-5.99249	6.52817e-17
35	Q2YR45	Basic helix-loop-helix dimerization domain bHLH:BolA-like protein	bolA BAB1_2027	NaN	NaN	NaN	NaN	NaN	NaN	0	NaN	20.1255	20.8853	20.0722	20.0493	20.2091	5	+	+	33.997	62675000	31	3.25097	-5.8819	0.00056109
36	Q2YNE3	Proline--tRNA ligase (EC 6.1.1.15) (Prolyl-tRNA synthetase) (ProRS)	proS BAB1_0842	NaN	NaN	NaN	NaN	NaN	NaN	0	NaN	19.9555	20.3243	20.09	19.7628	20.0771	5	+	+	7.5547	27164000	19	3.26283	-5.69327	0.000545967
37	Q2YMZ2	Antifreeze protein, type I	BAB1_0655	NaN	NaN	NaN	NaN	NaN	NaN	0	19.7831	19.3249	20.311	NaN	19.7332	19.9375	5	+	+	17.218	19709000	16	3.24757	-5.50662	0.000565492
38	Q2YQD3	ATP-dependent DNA ligase	BAB1_1384	NaN	NaN	NaN	NaN	NaN	NaN	0	20.9742	20.7383	22.1043	21.0685	NaN	NaN	4	+	+	64.128	55157000	10	1.98001	-5.3409	0.010471
39	Q2YN33	OmpA-like transmembrane domain	BAB1_0722	NaN	NaN	NaN	NaN	NaN	NaN	0	20.4003	21.0104	20.6356	NaN	20.3612	NaN	4	+	+	2.7237	34426000	12	1.99058	-4.92792	0.0102193
40	Q2YM83	Cytochrome c heme-binding site:Cytochrome C oxidase, mono-heme subunit/FixO (EC 1.9.3.1)	ccoO BAB1_0391	NaN	NaN	NaN	NaN	NaN	NaN	0	18.9299	NaN	18.9983	18.895	18.9413	18.9283	5	+	+	17.749	14336000	6	3.26943	-4.7738	0.000537743
41	Q2YR84	Brucella melitensis biovar Abortus 2308 chromosome I, complete sequence, strain 2308	BAB1_1985	NaN	NaN	NaN	NaN	NaN	NaN	0	17.4144	17.7724	17.9502	17.7174	18.012	18.0032	6	+	+	13.102	10064000	14	12.5212	-4.60161	3.01132e-13
42	F2HZF8	Adenine nucleotide translocator 1	BM28_B0011	NaN	NaN	NaN	NaN	NaN	NaN	0	18.2593	18.2348	18.4087	NaN	18.3043	17.9244	5	+	+	3.7854	9411300	12	3.25975	-4.18024	0.00054986
43	Q2YMD8	Uncharacterized protein	BAB1_0437	NaN	NaN	NaN	NaN	NaN	NaN	0	19.016	NaN	18.8479	18.9564	NaN	18.8927	4	+	+	31.345	17404000	19	1.9944	-3.81217	0.0101297
44	Q2YQZ9	Calcium-binding EF-hand	BAB1_2075	NaN	NaN	NaN	NaN	NaN	NaN	0	NaN	17.8402	17.8423	17.7686	NaN	17.8724	4	+	+	63.464	15497000	16	1.9946	-3.0806	0.0101251
45	F2HWC2	Dihydroxyacetone kinase subunit L	BM28_A1631	NaN	NaN	18.9443	NaN	NaN	NaN	1	22.4126	22.3895	22.5998	21.6687	22.1664	22.3705	6	+	+	223.93	114940000	51	5.11456	-8.10221	7.6814e-06
46	Q2YJ22	Oxidoreductase, N-terminal:Oxidoreductase, C-terminal (EC 1.1.1.48)	BAB2_0293	NaN	NaN	NaN	18.4902	NaN	NaN	1	21.804	21.4632	21.1636	21.1248	21.4147	21.5467	6	+	+	62.011	123430000	30	5.05677	-7.32945	8.77462e-06
47	Q2YKG3	Uncharacterized protein	BAB2_0697	NaN	NaN	17.4402	NaN	NaN	NaN	1	19.9093	22.5778	21.5974	20.0293	21.9537	19.7201	6	+	+	4.1976	63546000	20	5.00113	-7.04956	9.97399e-06
48	Q2YLL8	50S ribosomal protein L27	rpmA BAB1_1857	NaN	NaN	NaN	16.9652	NaN	NaN	1	17.8504	17.6641	19.0417	20.2061	18.2354	17.8122	6	+	+	89.687	30055000	16	4.00792	-4.63244	9.81934e-05
49	F2HRI2	Uncharacterized protein	BM28_A1804	NaN	NaN	18.8943	NaN	NaN	NaN	1	19.3658	18.6871	19.8785	18.7661	NaN	18.9754	5	+	+	5.4819	23872000	14	1.79359	-3.98976	0.0160847
50	Q2YMC0	Uncharacterized protein	BAB1_0418	NaN	19.2448	NaN	18.5084	NaN	NaN	2	25.704	25.408	25.8565	25.6107	25.6956	25.3051	6	+	+	219.93	858170000	94	5.26847	-10.4978	5.38923e-06
51	F2HXT1	Leu/Ile/Val-binding protein family	BM28_B1178	18.9221	NaN	16.1432	NaN	NaN	NaN	2	24.5707	24.7253	24.3207	24.7567	24.74	24.901	6	+	+	323.31	1122500000	373	5.87521	-10.0182	1.33287e-06
52	Q2YMR6	Superoxide dismutase (EC 1.15.1.1)	BAB1_0591	23.9036	NaN	NaN	NaN	NaN	23.7459	2	24.7789	24.495	24.7767	24.494	24.7581	24.7598	6	+	+	138.28	1059500000	82	2.27241	-7.92881	0.00534057
53	Q2YIG5	Arginase (EC 3.5.3.1)	rocF BAB2_0337	18.6407	NaN	18.8633	NaN	NaN	NaN	2	21.559	21.5878	20.5409	21.3789	21.4531	21.5278	6	+	+	146.12	103160000	50	3.47468	-6.28394	0.000335211
54	Q2YRR6	Peptidyl-prolyl cis-trans isomerase D (EC 5.2.1.8)	BAB1_1162	NaN	NaN	18.9984	18.3261	NaN	NaN	2	20.4519	19.9038	19.9893	19.8857	20.3668	19.8466	6	+	+	113.88	39738000	18	2.84657	-5.04659	0.00142373
55	Q2YJH5	High-affinity zinc uptake system protein ZnuA	znuA BAB2_1079	NaN	17.2511	17.237	NaN	NaN	NaN	2	19.1111	19.6618	18.5204	18.6458	19.8178	20.3788	6	+	+	18.484	15542000	12	3.47962	-4.80126	0.00033142
56	Q2YLN5	Ubiquinone biosynthesis O-methyltransferase (2-polyprenyl-6-hydroxyphenol methylase) (EC 2.1.1.222) (3-demethylubiquinone 3-O-methyltransferase) (EC 2.1.1.64)	ubiG BAB1_1875	16.172	NaN	17.8558	15.6276	NaN	NaN	3	24.6897	24.692	24.3916	24.5582	24.3742	25.1031	6	+	+	323.31	849090000	225	6.53563	-9.75391	2.9132e-07
57	F2HWC3	Dihydroxyacetone kinase	BM28_A1632	19.012	NaN	19.5427	19.0749	NaN	NaN	3	22.281	22.4771	22.2388	22.4769	22.3902	22.5273	6	+	+	304.92	226420000	76	3.01055	-6.18862	0.00097599
58	Q2YJ19	KDPG and KHG aldolase (EC 4.1.2.21)	BAB2_0296	18.6554	NaN	19.0699	19.1597	NaN	NaN	3	21.7572	21.3571	21.9663	21.3888	22.0216	21.7545	6	+	+	130.37	158920000	52	2.83891	-5.62176	0.00144908
59	F2HTF1	Uncharacterized protein	BM28_A1301	18.2617	19.3567	NaN	NaN	NaN	19.994	3	21.0976	21.5059	21.1166	20.9511	20.9541	21.2512	6	+	+	129.73	69456000	46	2.33347	-4.93902	0.00464014
60	Q2YJS1	DNA gyrase, subunit B:Short-chain dehydrogenase/reductase SDR:Glucose/ribitol dehydrogenase	BAB2_0975	19.5208	NaN	19.7573	19.0278	NaN	NaN	3	20.992	21.1153	20.7604	21.3033	20.6502	21.5959	6	+	+	156.65	156380000	61	2.15788	-4.74686	0.00695216
61	F2HVY7	Extracellular solute-binding protein	BM28_A0870	18.4726	NaN	NaN	18.64	NaN	19.7363	3	19.3861	20.7974	20.4833	20.2091	20.041	19.494	6	+	+	89.827	28986000	15	1.89934	-3.98865	0.0126083
62	F2HTM4	Imidazole glycerol phosphate synthase subunit HisF (EC 4.1.3.-) (IGP synthase cyclase subunit) (IGP synthase subunit HisF) (ImGP synthase subunit HisF)	hisF BM28_A2072	18.707	NaN	18.3387	18.6299	NaN	NaN	3	19.3689	19.2554	19.3153	19.6291	19.8283	19.4703	6	+	+	7.0208	35144000	17	1.87028	-3.59362	0.013481
63	Q2YJT0	Dihydrodipicolinate synthetase (EC 4.2.1.52)	BAB2_0961	17.1605	NaN	15.5481	16.5035	NaN	NaN	3	18.2325	15.8523	16.3771	17.3529	17.1084	18.0265	6	+	+	323.31	384330000	58	1.73958	-2.35126	0.0182148
64	F2HRA2	Glutathione reductase	BM28_A1021	18.0637	NaN	18.8958	18.5389	17.526	NaN	4	24.5601	24.7908	24.4147	24.3834	24.2797	23.7513	6	+	+	259.51	373520000	114	4.50736	-7.78929	3.10915e-05
65	Q2YQJ7	Uncharacterized protein	BAB1_1336	NaN	21.007	21.0143	NaN	21.9745	22.4893	4	24.6096	24.635	24.7973	24.0741	25.0429	24.5436	6	+	+	50.966	1238500000	64	2.04778	-5.79954	0.00895822
66	Q2YKX9	Glycine dehydrogenase (decarboxylating) (EC 1.4.4.2) (Glycine cleavage system P-protein) (Glycine decarboxylase) (Glycine dehydrogenase (aminomethyl-transferring))	gcvP BAB2_0515	19.294	18.4826	19.0294	NaN	18.8893	NaN	4	21.7817	22.172	22.8133	22.4435	22.0722	22.2566	6	+	+	170.28	190420000	90	2.80711	-5.23735	0.00155915
67	Q2YQE8	Calcium-binding EF-hand	BAB1_1355	NaN	NaN	20.6068	19.4585	18.4845	19.3325	4	21.431	21.4367	22.1001	22.2551	21.8327	21.6691	6	+	+	130.09	234820000	113	2.05852	-4.40376	0.00873941
68	F2HXV9	Family 1 extracellular solute-binding protein	BM28_B0298	18.1017	18.187	17.4191	18.155	NaN	NaN	4	19.9334	19.7555	19.9918	19.5519	19.9947	19.9766	6	+	+	68.539	46117000	46	2.20276	-3.48683	0.0062696
69	Q2YQ44	Uncharacterized protein	BAB1_1048	18.4742	18.0065	19.1676	19.2563	NaN	NaN	4	19.5959	21.6732	20.0691	20.5927	19.6349	20.3847	6	+	+	13.639	39824000	17	1.74053	-3.43763	0.0181747
70	Q2YQP2	Putative fluoride ion transporter CrcB	crcB BAB1_1389	17.8607	17.876	18.4488	17.7073	NaN	NaN	4	20.2295	20.6318	19.866	19.7499	18.8628	19.1268	6	+	+	6.8899	22758000	12	2.03304	-3.359	0.00926736
71	Q2YS13	Antifreeze protein, type I	BAB1_1495	20.6932	19.8338	NaN	20.9224	21.5871	21.2083	5	22.0434	24.2688	24.9422	25.3775	24.0618	24.3915	6	+	+	6.9677	487810000	35	2.12594	-4.60506	0.00748271
72	Q2YIK0	Sulfoxide reductase catalytic subunit YedY (EC 1.8.-.-)	yedY BAB2_0243	20.144	20.6446	19.5626	19.4761	20.2813	NaN	5	22.9286	22.7217	22.8309	22.6332	22.5559	21.8936	6	+	+	91.02	201530000	100	2.02115	-3.70756	0.00952458
73	Q2YNW1	Prokaryotic sulfate-/thiosulfate-binding protein:Bacterial extracellular solute-binding protein, family 1	BAB1_0104	22.1746	22.7524	22.7961	22.2837	22.1989	19.9226	6	27.9181	27.2515	27.7476	27.8946	27.7775	27.7653	6	+	+	323.31	5834700000	443	6.79888	-5.70441	1.589e-07
74	Q2YQB8	Periplasmic binding protein/LacI transcriptional regulator	BAB1_1648	17.9796	20.0726	20.3285	19.8685	19.5392	19.8955	6	24.7258	24.0897	25.579	24.4621	24.6363	24.5307	6	+	+	323.31	499180000	139	6.75997	-5.05663	1.73792e-07
75	F2HQD9	Glycine betaine ABC transporter substrate-binding protein	BM28_A0236	18.5096	19.5203	19.7746	19.2384	18.8932	17.8435	6	24.231	24.0482	24.0459	23.5007	23.5326	23.1933	6	+	+	323.31	280120000	82	7.28092	-4.79533	5.23694e-08
76	Q2YJ16	Aldehyde dehydrogenase (EC 1.2.1.-)	BAB2_0327	20.3278	19.3357	20.0803	19.0549	18.9549	18.4884	6	23.7317	24.4483	23.5603	23.9728	23.5252	23.817	6	+	+	323.31	1049400000	177	7.17445	-4.46889	6.69195e-08
77	Q2YLS7	Dihydrolipoyl dehydrogenase (EC 1.8.1.4)	lpdA-2 BAB1_1918	23.9876	23.7272	24.1975	23.3632	23.4166	22.908	6	27.3062	27.2967	27.8691	28.0206	27.7638	27.6617	6	+	+	323.31	4211600000	664	8.20489	-4.05298	6.23894e-09
78	F2HX63	Uncharacterized protein	BM28_B0189	18.0283	18.6254	17.4631	18.28	19.5508	20.5688	6	22.6003	22.0487	22.728	22.4507	22.809	22.1901	6	+	+	169.64	126390000	74	4.8332	-3.71842	1.46824e-05
79	Q2YIN7	Molybdenum ABC transporter, periplasmic binding protein	modA BAB2_0087	21.254	22.0389	20.4607	21.9508	22.3815	23.474	6	25.1993	24.8185	25.0196	25.0395	25.1991	25.1573	6	+	+	323.31	1023100000	222	4.66931	-3.14558	2.14137e-05
80	Q2YPZ4	Acyl-CoA dehydrogenase:Acyl-CoA dehydrogenase, C-terminal:Acyl-CoA dehydrogenase, central domain:Acyl-CoA dehydrogenase, N-te (EC 1.3.99.7)	BAB1_1109	21.6096	19.9269	21.7116	20.8107	19.9936	19.6947	6	23.5653	23.4429	23.251	23.9586	23.6697	23.9986	6	+	+	323.31	938810000	209	4.89462	-3.02319	1.27462e-05
81	Q2YKL5	UPF0173 metal-dependent hydrolase BAB2_0644	BAB2_0644	24.9111	26.5265	24.7782	25.6598	26.3501	26.6186	6	28.9203	28.4117	28.8524	28.7002	28.8795	28.684	6	+	+	323.31	9384000000	523	5.1847	-2.93397	6.53578e-06
82	F2HZT8	Lipoprotein	BM28_B0934	23.0874	23.9338	23.0714	23.5877	23.7272	23.9091	6	26.5273	26.3492	26.5203	26.374	26.3587	26.1615	6	+	+	323.31	2718100000	449	7.95135	-2.82905	1.11853e-08
83	Q2YMY7	Porin Omp2b	omp2b BAB1_0660	22.2332	23.7363	22.0031	23.3761	23.2562	23.3411	6	25.5182	25.2571	25.6621	25.7908	25.8224	25.6912	6	+	+	323.31	1480700000	354	5.30947	-2.63262	4.90377e-06
84	Q2YN61	Uncharacterized protein	BAB1_0729	19.5169	21.092	19.3149	19.392	20.4375	20.4011	6	22.7537	22.8839	23.02	22.1772	22.0769	22.6709	6	+	+	248.02	267390000	90	4.78125	-2.57137	1.65482e-05
85	Q2YNC6	6,7-dimethyl-8-ribityllumazine synthase 1 (DMRL synthase 1) (LS 1) (Lumazine synthase 1) (EC 2.5.1.78) (Type I lumazine synthase)	ribH1 BAB1_0791	20.0893	21.6357	20.741	20.1928	20.4809	20.6812	6	23.2701	23.4728	22.7177	23.7791	23.457	22.0505	6	+	+	158.96	272220000	43	4.55922	-2.48773	2.75916e-05
86	Q2YK02	Uncharacterized protein	BAB2_0880	25.1027	26.3845	25.679	26.569	26.0107	25.9828	6	28.6389	28.5013	28.3643	28.2814	28.3658	28.2591	6	+	+	323.31	9603000000	467	6.19877	-2.447	6.3275e-07
87	Q2YNH7	Solute-binding protein/glutamate receptor:Ionotropic glutamate receptor:Bacterial extracellular solute-binding protein, family 3	BAB1_0881	21.4642	20.5128	19.2591	20.9971	22.2073	22.9308	6	23.1718	23.9317	23.8853	23.6305	23.5571	23.4316	6	+	+	242.48	611170000	120	2.86813	-2.37277	0.00135479
88	Q2YLY4	Uncharacterized protein	BAB1_1543	20.7867	20.6976	21.2358	20.9444	20.8538	20.78	6	23.1709	23.6489	23.1079	23.2238	22.9513	23.0317	6	+	+	48.348	299890000	58	8.25749	-2.30602	5.52731e-09
89	Q2YKN9	Uncharacterized protein	BAB2_0618	20.2992	22.1326	20.5948	20.7854	21.8959	22.4797	6	23.6594	22.5259	23.8214	23.8555	23.8476	23.4198	6	+	+	53.033	443160000	119	3.29169	-2.157	0.000510874
90	Q2YND4	Uncharacterized protein	BAB1_0817	21.347	22.7832	21.5943	22.2635	22.4807	22.8427	6	24.1697	24.7255	24.3888	24.4114	24.3811	24.1134	6	+	+	297.95	732760000	191	4.92614	-2.14638	1.18539e-05
91	F2HZ05	Glycine cleavage system H protein	gcvH BM28_B0694	21.1545	20.5687	21.1301	21.134	20.9164	21.0849	6	22.9488	23.7208	23.4125	23.0053	22.6391	22.9296	6	+	+	216.18	399920000	60	6.35388	-2.11126	4.42707e-07
92	Q2YJ80	L-threonine aldolase (EC 4.1.2.48)	BAB2_0051	18.573	18.8747	18.9631	19.1718	18.6445	19.0905	6	21.361	21.7394	21.1929	20.2206	21.0192	20.027	6	+	+	49.672	57505000	23	4.44919	-2.04041	3.55476e-05
93	Q2YLP8	GCN5-related N-acetyltransferase (EC 2.3.1.-)	BAB1_1904	22.2465	21.3562	22.217	21.8723	21.7442	21.3589	6	23.5277	23.6834	23.5581	23.3766	23.7689	24.101	6	+	+	132.14	496350000	153	5.72699	-1.87009	1.87502e-06
94	Q2YND8	50S ribosomal protein L13	rplM BAB1_0811	20.8156	19.2553	20.3231	18.8673	19.1988	19.7435	6	21.9054	20.9815	22.1347	21.0529	20.8865	22.1688	6	+	+	267.39	285620000	100	3.03096	-1.82102	0.000931184
95	Q2YIP8	Lipoprotein Omp10	omp10 BAB2_0076	19.456	22.6024	20.3177	20.8141	21.6005	21.7106	6	23.4663	21.8442	23.1841	22.548	22.681	23.2561	6	+	+	111.01	320440000	58	2.14681	-1.74641	0.00713158
96	F2HZ06	Aminomethyltransferase (EC 2.1.2.10)	gcvT BM28_B0695	20.9144	19.8657	21.7484	20.5908	20.2167	19.2083	6	21.9544	22.1465	22.2659	21.9622	22.2185	22.3451	6	+	+	208.11	163770000	62	3.09621	-1.7247	0.000801285
97	F2HSA5	Succinyl-CoA ligase [ADP-forming] subunit beta (EC 6.2.1.5) (Succinyl-CoA synthetase subunit beta)	sucC BM28_A1917	25.1635	24.6266	25.1956	24.9852	24.5703	23.7943	6	26.462	26.5175	26.4148	26.1698	26.4097	26.6126	6	+	+	323.31	3345100000	477	4.76586	-1.70849	1.71451e-05
98	Q2YNC7	NADH-quinone oxidoreductase subunit C (EC 1.6.5.11) (NADH dehydrogenase I subunit C) (NDH-1 subunit C)	nuoC BAB1_0824	19.6345	19.8126	19.8001	19.7982	19.5473	19.5383	6	21.6281	21.5892	20.6402	21.1679	21.5664	21.7019	6	+	+	85.565	98080000	42	5.66356	-1.69376	2.16992e-06
99	Q2YP18	Integration host factor subunit beta (IHF-beta)	ihfB himD BAB1_0152	22.5094	21.4966	20.8742	22.449	22.6913	21.8907	6	24.0625	24.3462	23.3821	23.6417	22.8287	23.7819	6	+	+	37.072	385150000	64	3.06961	-1.68865	0.000851905
100	Q2YLS1	Succinyl-CoA ligase [ADP-forming] subunit alpha (EC 6.2.1.5)	BAB1_1925	24.2422	23.4987	24.1579	23.8081	23.3752	22.8458	6	25.3247	25.2631	25.3413	25.0688	25.4549	25.4569	6	+	+	205.6	1528100000	240	4.67742	-1.66362	2.10176e-05
101	Q2YNY3	Outer membrane protein, putative	BAB1_0116	23.1068	24.0816	22.7933	23.7941	23.6413	24.1588	6	24.8387	24.8595	25.5123	25.2692	25.2017	25.3437	6	+	+	323.31	989900000	210	4.08164	-1.57487	8.28624e-05
102	Q2YLU2	Peptidylprolyl isomerase (EC 5.2.1.8)	BAB1_1944	21.2182	22.2038	21.5916	21.1936	22.6395	22.4114	6	23.3597	23.6018	23.3222	23.4238	22.9835	23.4029	6	+	+	186.78	471010000	180	3.57239	-1.47265	0.000267679
103	Q2YP63	Aldehyde dehydrogenase (EC 1.2.1.3)	BAB1_0211	22.1329	23.348	22.9698	22.7966	22.6616	23.4081	6	24.2017	24.8295	23.7297	24.4762	24.2291	24.4797	6	+	+	281.92	1008900000	325	3.80535	-1.43819	0.00015655
104	Q2YM12	50S ribosomal protein L1	rplA BAB1_1267	22.7746	20.9777	22.3225	22.4064	21.2586	21.1587	6	23.1043	23.3181	23.5559	23.2331	23.103	23.1803	6	+	+	160.41	503040000	143	2.9054	-1.43271	0.00124338
105	F2HUA9	Cobalt ABC transporter periplasmic binding protein CbiN	BM28_A1376	23.3856	24.9365	23.6739	24.4243	24.9402	24.788	6	25.8605	26.1149	26.0584	25.5643	25.9013	25.2433	6	+	+	323.31	1551500000	273	3.0557	-1.43237	0.000879632
106	Q2YM78	Glyoxalase/Bleomycin resistance protein/dioxygenase domain:Glyoxalase I (EC 4.4.1.5)	gloA BAB1_1286	23.5497	24.8139	23.2605	24.666	25.0824	25.4761	6	25.8304	25.8171	26.1602	25.7843	25.9984	25.5484	6	+	+	323.31	2066500000	304	2.42344	-1.38168	0.0037719
107	Q2YK18	Probable acid stress chaperone HdeA	hdeA BAB2_0862	27.1754	28.5223	27.3806	27.9328	28.6739	28.8187	6	29.5482	29.5262	29.5224	29.5886	29.6169	28.9205	6	+	+	232.23	30288000000	449	2.94673	-1.36985	0.00113049
108	F2HQS8	Beta-lactamase domain-containing protein	BM28_A1007	19.7151	21.8633	19.9802	20.7587	21.5475	21.4005	6	22.1682	22.546	22.4213	21.8916	21.9841	22.4604	6	+	+	63.674	194790000	76	2.3445	-1.36772	0.00452373
109	F2HSA6	Malate dehydrogenase (EC 1.1.1.37)	mdh BM28_A1918	25.415	23.4164	24.6726	23.6396	23.4095	23.2366	6	25.2109	25.1416	25.0172	25.4269	25.0588	26.0802	6	+	+	323.31	2015000000	403	2.20676	-1.35765	0.00621215
110	Q2YL86	Leu/Ile/Val-binding protein homolog 4	BAB2_0023	22.247	22.5234	22.6174	22.5247	22.2233	22.2442	6	23.8166	24.0486	23.5893	23.615	23.5305	23.8339	6	+	+	276.34	415790000	165	6.68362	-1.34234	2.07196e-07
111	Q2YMR8	ErfK/YbiS/YcfS/YnhG:Twin-arginine translocation pathway signal	BAB1_0589	21.1718	21.62	21.2672	21.2275	21.7093	22.0374	6	22.8737	22.9746	22.7336	22.8841	22.7345	22.8024	6	+	+	47.668	304330000	101	5.46156	-1.3283	3.4549e-06
112	Q2YLV3	Universal stress protein	BAB1_1967	20.2693	19.8896	20.6125	18.904	20.1862	19.6012	6	21.535	20.9493	21.0632	21.119	21.1389	21.5403	6	+	+	94.056	90340000	52	3.2303	-1.3138	0.000588432
113	Q2YQH0	CBS domain	BAB1_1274	24.9021	25.6681	26.262	25.9866	26.4689	26.9488	6	27.6353	27.2492	27.0757	27.1802	27.2602	27.6372	6	+	+	323.31	5670700000	454	2.78638	-1.30019	0.0016354
114	Q2YKV9	Superoxide dismutase [Cu-Zn] (EC 1.15.1.1)	sodC BAB2_0535	28.8277	30.223	28.7811	29.3431	30.2942	30.3999	6	31.1737	30.69	31.0237	30.8881	30.9956	30.8398	6	+	+	323.31	75483000000	1848	2.66907	-1.29034	0.00214254
115	Q2YRA0	50S ribosomal protein L22	rplV BAB1_1250	21.5201	21.9555	21.5087	21.973	21.7263	21.5364	6	22.8355	23.1736	23.4527	23.3195	22.603	22.5716	6	+	+	134.63	474220000	161	4.57408	-1.2893	2.66637e-05
116	Q2YPU4	Uncharacterized protein	BAB1_1419	27.8294	29.4746	28.2509	28.8856	29.4219	29.784	6	29.9873	30.1251	30.2375	30.4034	30.4435	30.0637	6	+	+	323.31	49682000000	1301	2.55662	-1.26905	0.00277576
117	Q2YRT5	50S ribosomal protein L15	rplO BAB1_1236	23.1745	23.1102	23.0315	23.2565	22.6414	22.7331	6	24.2741	24.3376	24.4183	24.2476	23.9989	24.2096	6	+	+	270.31	1092700000	229	6.08734	-1.25647	8.17819e-07
118	Q2YLE0	7Fe ferredoxin:4Fe-4S ferredoxin, iron-sulfur binding domain	fdxA BAB1_1778	22.5426	24.5085	22.3754	23.2035	24.0398	24.1385	6	25.1399	24.5358	24.9279	24.5024	24.8103	24.4152	6	+	+	178.63	1146700000	135	2.08228	-1.25386	0.00827405
119	Q2YN92	Rhodopsin-like GPCR superfamily:Lumazine-binding protein (EC 2.5.1.9)	BAB1_0790	22.9101	24.4825	23.1203	23.2838	24.1145	24.213	6	25.2708	25.0064	24.8584	24.9079	24.7279	24.8596	6	+	+	323.31	1151000000	342	2.92023	-1.25112	0.00120163
120	Q2YLB9	Leu/Ile/Val-binding protein family	BAB2_0282	23.1231	22.4167	23.5963	23.3515	21.7964	22.1423	6	23.836	24.0654	23.9707	24.0053	23.9875	24.0423	6	+	+	323.31	621960000	249	2.7407	-1.24682	0.00181677
121	Q2YN31	Dihydroorotase (DHOase) (EC 3.5.2.3)	pyrC-1 pyrC BAB1_0688	23.7373	25.2269	23.6158	24.6918	25.1174	25.7728	6	25.7568	25.8973	26.1343	25.8428	25.9434	25.878	6	+	+	318.91	2199800000	432	2.18445	-1.21511	0.00653958
122	Q2YRU1	50S ribosomal protein L17	rplQ BAB1_1230	21.3508	21.1491	20.0296	21.1174	22.0454	21.7073	6	22.0614	22.2597	22.8292	23.1811	22.1259	22.2105	6	+	+	104.31	328120000	94	2.31504	-1.21136	0.00484131
123	F2HQV0	Glyceraldehyde-3-phosphate dehydrogenase (EC 1.2.1.-)	BM28_A1729	24.2992	23.0305	24.528	23.8742	23.2933	22.8958	6	25.372	24.8754	24.553	24.7665	24.7813	24.7233	6	+	+	323.31	2134400000	407	2.57379	-1.19173	0.00266815
124	Q2YKA5	Uncharacterized protein	BAB2_0759	20.8003	19.9634	20.9873	19.856	20.0683	19.4412	6	21.5505	21.7506	20.8734	20.7375	21.6586	21.6364	6	+	+	50.577	101660000	33	2.54342	-1.18174	0.00286143
125	Q2YMF5	Exodeoxyribonuclease 7 small subunit (EC 3.1.11.6) (Exodeoxyribonuclease VII small subunit)	xseB BAB1_0457	21.0443	23.0314	21.0684	21.8039	22.577	22.6917	6	23.2724	22.8303	23.7063	22.9369	23.2683	22.8869	6	+	+	120.82	320200000	115	1.84695	-1.11406	0.0142248
126	Q2YN40	Nucleoside diphosphate kinase (NDK) (NDP kinase) (EC 2.7.4.6) (Nucleoside-2-P kinase)	ndk BAB1_0715	26.0506	27.4765	26.3501	26.7593	27.2775	27.2331	6	27.9985	27.8788	28.015	27.9638	28.0541	27.9015	6	+	+	323.31	9857100000	643	3.10649	-1.11078	0.000782547
127	Q2YRN7	Uncharacterized protein	BAB1_1524	20.6868	21.7512	21.0893	20.6525	21.049	21.7862	6	22.4667	22.176	21.9983	22.1306	22.2043	22.4816	6	+	+	136.7	162700000	82	3.2224	-1.07375	0.000599234
128	Q2YRT2	50S ribosomal protein L18	rplR BAB1_1239	23.1349	23.784	22.833	23.9439	23.8033	23.6765	6	24.1578	24.8045	24.9282	25.1068	24.5834	23.9855	6	+	+	265.11	1333000000	233	2.71982	-1.06511	0.00190625
129	Q2YMC5	ATP synthase subunit b 1 (ATP synthase F(0) sector subunit b 1) (ATPase subunit I 1) (F-type ATPase subunit b 1) (F-ATPase subunit b 1)	atpF1 BAB1_0413	21.348	20.8018	21.5254	20.7671	20.519	20.4839	6	21.6631	22.4571	21.6178	22.3433	22.1487	21.5301	6	+	+	94.683	251430000	55	2.84009	-1.05249	0.00144514
130	Q2YLK6	30S ribosomal protein S16	rpsP BAB1_1832	23.0485	23.9586	22.969	23.7891	23.4906	23.3589	6	24.1189	24.8593	24.8507	24.744	24.3638	23.9618	6	+	+	323.31	1035700000	244	3.0253	-1.04731	0.000943406
131	F2HZN0	N-acetylglucosamine-6-phosphate deacetylase (EC 3.5.1.25) (GlcNAc 6-P deacetylase)	nagA BM28_B0876	23.2119	23.8182	23.5151	23.688	23.6318	23.5405	6	24.6827	24.572	24.4598	24.7721	24.5957	24.5282	6	+	+	246.04	697100000	216	6.11879	-1.03415	7.60688e-07
132	F2HRU8	Pyridoxine/pyridoxamine 5'-phosphate oxidase (EC 1.4.3.5) (PNP/PMP oxidase) (Pyridoxal 5'-phosphate synthase)	pdxH BM28_A0439	23.1329	24.0989	22.9761	22.8089	23.4348	22.6242	6	24.4098	25.0594	23.6111	24.1691	23.8544	23.9939	6	+	+	30.296	654690000	72	2.13396	-1.00365	0.00734575
133	Q2YQV7	50S ribosomal protein L20	rplT BAB1_2124	21.6756	21.4254	21.636	21.0128	20.763	21.9663	6	22.3487	22.5524	22.8792	22.8347	21.8418	22.0373	6	+	+	101.42	322470000	84	2.59193	-1.00251	0.00255902
134	Q2YMH2	50S ribosomal protein L9	rplI BAB1_0477	23.9745	24.6909	23.96	24.46	24.5659	24.3259	6	25.2315	25.4881	25.5381	25.4622	25.256	24.9151	6	+	+	323.31	1831500000	382	4.0415	-0.985639	9.08869e-05
135	Q2YND9	30S ribosomal protein S9	rpsI BAB1_0810	23.4835	23.2369	23.4076	24.0556	23.8179	23.8546	6	24.5377	24.7919	25.0028	24.6059	24.4849	24.0918	6	+	+	323.31	1071100000	217	3.43386	-0.943166	0.000368249
136	Q2YQY2	ATP/GTP-binding site motif A (P-loop)	BAB1_2094	21.3697	22.0646	21.229	21.628	22.0426	21.2755	6	22.4206	22.5236	22.1937	22.8192	22.651	22.6388	6	+	+	114.13	220760000	94	3.45873	-0.939554	0.000347756
137	Q2YRA6	50S ribosomal protein L24	rplX BAB1_1244	22.7234	22.9005	22.8869	23.0036	23.1255	23.4468	6	23.8143	24.0378	24.5173	23.9875	23.9033	23.4406	6	+	+	46.189	948900000	110	3.47813	-0.935709	0.00033256
138	Q2YMJ0	Uncharacterized protein	BAB1_0491	21.3753	21.9548	20.6303	21.529	21.6544	21.9995	6	22.8173	21.7404	22.6764	22.3712	22.3804	22.6643	6	+	+	52.849	180440000	75	2.2844	-0.917785	0.00519514
139	Q2YP35	Protein GrpE (HSP-70 cofactor)	grpE BAB1_0170	23.9346	24.0798	23.8256	23.8647	23.8104	23.2691	6	24.7658	24.6802	24.9311	24.6385	24.5617	24.6978	6	+	+	323.31	1176300000	335	4.61779	-0.915175	2.41108e-05
140	Q2YRZ2	Uncharacterized protein	BAB1_1754	23.9973	25.3941	24.1733	24.7617	25.1795	25.1216	6	25.8494	25.8509	25.3023	25.4303	25.9699	25.6504	6	+	+	269.64	1956100000	220	2.25552	-0.904296	0.00555234
141	Q2YM05	50S ribosomal protein L23	rplW BAB1_1253	22.2349	22.9474	21.8258	22.8794	22.7633	22.0687	6	23.3725	23.5359	23.698	23.4783	23.3031	22.7363	6	+	+	257.74	539460000	156	2.47646	-0.900767	0.00333838
142	Q2YNF9	NADH dehydrogenase (Ubiquinone), 24 kDa subunit (EC 1.6.5.3)	nuoE BAB1_0826	20.8698	20.6483	21.0154	20.6799	20.4638	20.4036	6	21.8543	21.226	21.6126	21.1011	21.726	21.8624	6	+	+	82.108	119170000	83	3.52112	-0.883595	0.000301215
143	Q2YRN8	Transcription elongation factor GreA (Transcript cleavage factor GreA)	greA BAB1_1523	22.89	24.2084	22.9375	23.3977	23.7582	23.5444	6	24.6326	24.3122	24.6891	24.301	24.3967	23.6889	6	+	+	190.76	965080000	223	2.24548	-0.880739	0.00568228
144	Q2YN49	Peptidyl-prolyl cis-trans isomerase, putative	BAB1_0706	22.3388	22.903	22.1111	22.2438	22.1587	22.6706	6	23.2471	23.3764	23.2031	23.3601	23.086	23.3969	6	+	+	321.52	391130000	143	4.07276	-0.873916	8.45751e-05
145	Q2YLX6	50S ribosomal protein L25 (General stress protein CTC)	rplY ctc BAB1_1551	25.2167	25.9042	24.0206	25.3186	25.7312	25.9687	6	26.5096	26.3676	26.2723	26.1581	26.1098	25.9709	6	+	+	323.31	3416700000	434	1.76255	-0.871392	0.0172764
146	F2HS75	Acyl-CoA thioesterase II	tesB BM28_A1887	20.703	22.7403	21.1816	21.8108	21.85	21.445	6	22.6682	22.5358	22.6308	22.3253	22.4886	22.268	6	+	+	209.5	273940000	136	1.85364	-0.864321	0.0140075
147	Q2YQ75	TatD-related deoxyribonuclease (EC 3.1.21.-)	BAB1_1015	20.3226	20.4968	19.398	20.6275	20.8203	21.2943	6	21.1525	21.3108	21.5051	21.4601	21.4583	21.1705	6	+	+	48.309	100980000	50	2.02225	-0.849669	0.0095006
148	Q2YPP2	Uncharacterized protein	BAB1_0051	21.9137	23.3456	22.3328	22.4815	22.5889	22.6422	6	23.5002	23.5407	23.3214	23.3966	23.4442	23.154	6	+	+	254.23	523160000	224	2.74759	-0.842075	0.00178818
149	Q2YMX6	Probable periplasmic serine endoprotease DegP-like (EC 3.4.21.107) (Protease Do)	htrA BAB1_0635	23.9298	24.3771	24.149	23.7084	24.2887	23.9537	6	25.1972	25.0806	24.4327	24.9458	24.7864	24.8894	6	+	+	323.31	1275400000	406	3.58811	-0.820927	0.000258163
150	Q2YN45	Probable cytosol aminopeptidase (Leucine aminopeptidase) (Leucyl aminopeptidase)	pepA BAB1_0710	26.6855	27.6091	26.6223	27.3431	27.6059	27.4523	6	28.1043	28.0736	28.0256	28.0399	28.123	27.8671	6	+	+	323.31	9807500000	1067	2.8536	-0.819215	0.00140088
151	Q2YPY6	Peptidyl-prolyl cis-trans isomerase (EC 5.2.1.8)	BAB1_1117	24.386	25.5261	24.6924	24.7153	25.2237	25.0413	6	25.9306	25.6022	25.8073	25.7354	25.6743	25.7233	6	+	+	323.31	2161400000	357	3.04888	-0.814704	0.00089355
152	F2HQZ1	50S ribosomal protein L32	rpmF BM28_A1770	20.4511	21.3131	20.5239	20.8703	20.7561	20.7634	6	21.9786	21.5635	21.8679	21.4858	21.6878	20.9543	6	+	+	73.324	144060000	47	2.73169	-0.809977	0.00185487
153	Q2YIJ2	10 kDa chaperonin (GroES protein) (Protein Cpn10)	groS groES BAB2_0190	27.5758	29.0368	27.7203	28.3553	28.8709	28.9889	6	29.213	29.2666	29.5308	29.1088	29.1849	28.9851	6	+	+	323.31	29822000000	995	1.77486	-0.790192	0.0167936
154	Q2YIY2	Periplasmic binding protein/LacI transcriptional regulator	rbsB-2 BAB2_0377	26.9292	27.8622	27.0395	27.6452	27.758	27.7817	6	28.2662	28.1839	28.6318	28.2152	28.4139	28.0455	6	+	+	323.31	12328000000	869	2.76032	-0.79011	0.00173651
155	F2HU01	Uncharacterized protein	BM28_A0646	21.8296	22.2451	21.9925	22.4431	22.2244	21.9101	6	22.7631	23.0115	22.9668	22.9474	22.6949	22.9937	6	+	+	79.5	304490000	115	4.5167	-0.788758	3.043e-05
156	Q2YPE7	Secretion protein HlyD	BAB1_0322	20.4034	20.1421	20.2834	20.4195	19.9933	19.416	6	20.3958	20.7164	20.0695	21.2707	21.4101	21.4796	6	+	+	33.043	76974000	29	1.68834	-0.780735	0.0204956
157	Q2YM04	50S ribosomal protein L4	rplD BAB1_1254	24.2962	24.314	24.3994	24.4653	24.2345	24.2337	6	25.0344	25.2333	25.3047	25.2201	25.2092	24.6228	6	+	+	323.31	1930100000	412	4.49024	-0.780227	3.23418e-05
158	F2HS46	Outer membrane protein assembly factor BamA	yaeT bamA BM28_A1162	23.9258	24.8821	23.807	24.578	24.8162	25.0135	6	25.7463	25.0678	25.2021	25.0433	25.272	25.3228	6	+	+	323.31	1811100000	467	2.08851	-0.771969	0.00815619
159	Q2YPM9	Nucleoid-associated protein BAB1_0030	BAB1_0030	21.9042	22.3827	21.7627	22.2516	21.9761	21.7607	6	22.9906	22.8761	22.8284	22.8233	22.6047	22.5341	6	+	+	33.678	281520000	100	3.92229	-0.769865	0.000119594
160	Q2YRT8	30S ribosomal protein S13	rpsM BAB1_1233	22.6105	23.1431	22.3832	23.3911	23.366	23.6161	6	23.8351	24.0445	24.1735	23.8168	23.6439	23.5525	6	+	+	270.69	695260000	151	2.20848	-0.759392	0.00618759
161	Q2YNV2	Uncharacterized protein	BAB1_0075	23.2069	22.483	22.7882	22.4105	22.4312	22.8476	6	23.6315	23.4853	23.4371	23.3981	22.9906	23.7222	6	+	+	236.35	569860000	136	2.98036	-0.749558	0.00104625
162	F2HX52	Aldo/keto reductase	BM28_B0178	23.157	23.3291	23.0299	22.9955	23.1723	23.0225	6	23.9516	23.7745	23.6625	23.9044	23.996	23.894	6	+	+	323.31	601080000	221	5.92027	-0.746134	1.20152e-06
163	Q2YRD7	Protein TolB	tolB BAB1_1709	22.51	22.379	22.36	21.7666	22.1158	21.8112	6	23.066	23.1913	22.5345	22.8812	22.7006	23.035	6	+	+	323.31	338670000	175	2.99391	-0.744346	0.00101412
164	Q2YLX2	UPF0335 protein BAB1_1765	BAB1_1765	23.9673	24.9406	24.1174	23.8213	24.628	24.4996	6	24.951	25.6371	25.0519	25.1216	24.8884	24.5684	6	+	+	323.31	1428400000	119	1.96343	-0.70739	0.0108786
165	Q2YM54	Ubiquinol-cytochrome c reductase iron-sulfur subunit (EC 1.10.2.2)	BAB1_1559	21.7265	22.7967	21.7162	22.3462	22.7292	22.3798	6	23.0142	22.6109	23.1572	22.8214	23.2439	23.0795	6	+	+	133.16	501620000	106	2.0877	-0.705413	0.00817145
166	Q2YQ99	Uncharacterized protein	BAB1_1632	19.3763	19.811	19.0885	19.8611	19.5393	19.8302	6	19.8988	20.2646	20.0799	20.5416	20.3201	20.61	6	+	+	63.88	47593000	30	2.7255	-0.701426	0.00188149
167	Q2YM03	50S ribosomal protein L3	rplC BAB1_1255	23.4377	24.2654	23.7091	24.5895	24.2678	23.8756	6	24.5136	25.103	24.97	24.7851	24.6822	24.2613	6	+	+	323.31	1672700000	366	2.06084	-0.694995	0.00869274
168	Q2YJN6	2,3-bisphosphoglycerate-dependent phosphoglycerate mutase (BPG-dependent PGAM) (PGAM) (Phosphoglyceromutase) (dPGM) (EC 5.4.2.11)	gpmA BAB2_1013	21.9353	21.3033	22.0301	21.593	21.5755	21.1063	6	22.1824	22.2822	22.1774	22.2366	22.3536	22.3671	6	+	+	59.798	262820000	128	2.97321	-0.675976	0.00106363
169	Q2YM07	30S ribosomal protein S19	rpsS BAB1_1251	22.1961	22.6389	21.5146	22.6168	22.0161	22.4184	6	22.6327	23.004	23.5312	23.1142	22.4996	22.5535	6	+	+	100.89	376870000	109	1.68179	-0.655719	0.0208072
170	Q2YLZ9	30S ribosomal protein S7	rpsG BAB1_1259	24.1974	25.3894	24.7723	25.139	25.2244	25.2512	6	25.7128	26.0207	25.7334	25.6409	25.5632	25.1983	6	+	+	323.31	2200100000	372	1.92801	-0.649247	0.0118029
171	Q2YPG1	Uncharacterized protein	BAB1_0343	21.4516	21.8907	21.1389	20.7774	22.1308	20.9501	6	22.132	22.1419	21.7382	22.2855	21.9006	21.9699	6	+	+	147.32	176360000	127	1.68008	-0.638093	0.0208893
172	F2HTC1	Uncharacterized protein	BM28_A1271	20.3659	20.7919	20.7506	20.5906	20.5668	20.3143	6	21.1472	21.2479	21.1347	21.1617	21.0787	21.4186	6	+	+	42.577	111020000	51	4.31815	-0.634808	4.80677e-05
173	Q2YP11	Sigma 54 modulation protein/ribosomal protein S30EA	BAB1_0159	22.3147	22.9478	22.661	22.6956	22.5829	22.4838	6	23.0076	23.5097	23.1389	23.2535	23.1983	23.3207	6	+	+	282.72	477650000	184	3.63893	-0.623843	0.000229652
174	Q2YRY0	Substrate-binding region of ABC-type glycine betaine transport system	BAB1_1593	23.7683	24.146	24.0973	23.9595	23.7062	23.7332	6	24.4848	24.4427	24.5863	24.2118	24.3109	24.5743	6	+	+	323.31	1125800000	327	3.50343	-0.533375	0.000313743
175	Q2YL53	Legume lectin, beta domain:OsmC-like protein	ohr BAB2_0351	22.0933	21.886	22.1603	21.9524	22.047	22.2932	6	23.0339	22.9953	22.2132	22.1694	22.2983	22.6852	6	+	+	204.36	404310000	83	1.79107	-0.493836	0.016178
176	Q2YNH2	30S ribosomal protein S4	rpsD BAB1_0851	24.9331	25.5337	24.8903	25.6367	25.326	25.2964	6	25.5799	25.9109	25.9439	25.9464	25.7149	25.415	6	+	+	323.31	2804600000	541	1.97564	-0.482466	0.010577

## Sheet: B. melitensis
Supplementary Table 1D: List of Proteins identified to be relatively abundent in B. melitensis : Yellow highlighted indicates the proteins identified only in case of B. melitensis.
S.No	Uniprot ID	Protein name/ Description	Gene name	Log2 normalised label free quantification intensities														T-test Significant	False Discovery Rate (FDR)	Score	Intensity	MS/MS Count	.-Log t-test p value	t-test Difference	t-test p value
				B. melitensis 09RB5232 (M)							B. abortus 09RB5689 (A)
				Expt. 1	Expt. 2	Expt. 3	Expt. 4	Expt. 5	Expt. 6	Count	Expt. 7	Expt. 8	Expt. 9	Expt. 10	Expt. 11	Expt. 12	Count
1	F2HYG8	Binding-protein-dependent transport systems inner membrane component	BM28_B0507	22.4171	NaN	22.2724	21.6767	21.8926	NaN	4	NaN	NaN	NaN	NaN	NaN	NaN	0	+	+	27.457	209540000	19	1.99097	5.90314	0.0102101
2	F2HV10	SmpA/OmlA domain-containing protein	BM28_A0781	21.571	21.9472	NaN	NaN	20.4394	21.4062	4	NaN	NaN	NaN	NaN	NaN	NaN	0	+	+	7.9341	68228000	23	1.97862	5.42063	0.0105046
3	Q2YNA1	Enoyl-CoA hydratase/isomerase (EC 4.2.1.17)	BAB1_0781	20.7871	NaN	22.1943	20.42	19.3807	NaN	4	NaN	NaN	NaN	NaN	NaN	NaN	0	+	+	43.205	69263000	14	1.93381	4.99034	0.0116463
4	F2HVH1	Heavy metal translocating P-type ATPase	BM28_A0231	20.7145	NaN	21.4262	20.823	19.628	NaN	4	NaN	NaN	NaN	NaN	NaN	NaN	0	+	+	50.469	42512000	19	1.96867	4.95862	0.010748
5	F2HYM8	Aspartyl/glutamyl-tRNA(Asn/Gln) amidotransferase subunit C (Asp/Glu-ADT subunit C) (EC 6.3.5.-)	gatC BM28_B0567	20.2787	20.0018	NaN	21.0192	20.8395	NaN	4	NaN	NaN	NaN	NaN	NaN	NaN	0	+	+	9.518	38138000	17	1.98387	4.88319	0.0103784
6	Q2YN10	Orotate phosphoribosyltransferase (OPRT) (OPRTase) (EC 2.4.2.10)	pyrE BAB1_0673	20.5374	19.233	20.511	NaN	19.0574	NaN	4	NaN	NaN	NaN	NaN	NaN	NaN	0	+	+	17.018	28587000	13	1.95748	4.41648	0.0110286
7	Q2YJ02	Bacterial regulatory protein LacI, HTH motif:Periplasmic binding protein/LacI transcriptional regulator	BAB2_0250	19.4998	NaN	21.0119	19.4296	18.9201	NaN	4	NaN	NaN	NaN	NaN	NaN	NaN	0	+	+	4.5236	24227000	4	1.94587	4.33689	0.0113275
8	F2HWI5	ATP-dependent zinc metalloprotease FtsH (EC 3.4.24.-)	ftsH BM28_A1694	20.7808	NaN	20.7554	18.2115	17.7834	NaN	4	NaN	NaN	NaN	NaN	NaN	NaN	0	+	+	6.2276	23054000	6	1.83396	4.11519	0.0146567
9	Q2YQT7	Phosphate-specific transport system accessory protein PhoU	phoU BAB1_2145	18.9454	18.629	19.5972	18.8607	NaN	NaN	4	NaN	NaN	NaN	NaN	NaN	NaN	0	+	+	3.6159	18555000	5	1.9815	3.86537	0.0104351
10	Q2YL14	Glutamate--cysteine ligase, plant (EC 6.3.2.2)	BAB2_0476	19.2528	18.0846	19.2294	18.9269	NaN	NaN	4	NaN	NaN	NaN	NaN	NaN	NaN	0	+	+	9.0713	15953000	9	1.97076	3.7756	0.0106965
11	Q2YLI6	ATP synthase gamma chain (ATP synthase F1 sector gamma subunit) (F-ATPase gamma subunit)	atpG BAB1_1808	18.8239	17.9768	18.6897	NaN	17.8625	NaN	4	NaN	NaN	NaN	NaN	NaN	NaN	0	+	+	28.035	14828000	14	1.97135	3.41882	0.0106821
12	Q2YMA4	Uncharacterized protein	BAB1_0399	18.047	17.8062	18.7188	18.4226	NaN	NaN	4	NaN	NaN	NaN	NaN	NaN	NaN	0	+	+	3.6158	11902000	3	1.9782	3.35911	0.0105148
13	Q2YJA3	NifH/frxC family:ATPase, ParA type	BAB2_1163	18.0972	17.8625	19.0135	17.9905	NaN	NaN	4	NaN	NaN	NaN	NaN	NaN	NaN	0	+	+	145.9	8489300	5	1.96686	3.35395	0.010793
14	Q2YM63	Ribosomal RNA small subunit methyltransferase H (EC 2.1.1.199) (16S rRNA m(4)C1402 methyltransferase) (rRNA (cytosine-N(4)-)-methyltransferase RsmH)	rsmH mraW BAB1_1458	18.5363	17.5727	NaN	18.1371	17.5696	NaN	4	NaN	NaN	NaN	NaN	NaN	NaN	0	+	+	19.124	6237000	8	1.96936	3.16262	0.010731
15	Q2YME4	Glycine--tRNA ligase alpha subunit (EC 6.1.1.14) (Glycyl-tRNA synthetase alpha subunit) (GlyRS)	glyQ BAB1_0431	18.0575	17.7255	18.3848	NaN	17.4247	NaN	4	NaN	NaN	NaN	NaN	NaN	NaN	0	+	+	9.5597	11449000	5	1.97454	3.12542	0.0106037
16	F2HVI8	50S ribosomal protein L13	rplM BM28_A0801	17.3811	17.4834	18.5795	17.8066	NaN	NaN	4	NaN	NaN	NaN	NaN	NaN	NaN	0	+	+	10.321	4521400	3	1.95917	3.06842	0.0109858
17	Q2YNQ5	Uncharacterized protein	BAB1_0948	17.37	17.4999	18.9214	17.212	NaN	NaN	4	NaN	NaN	NaN	NaN	NaN	NaN	0	+	+	30.94	7080900	2	1.91921	3.02722	0.0120446
18	F2HTJ0	ABC transporter periplasmic substrate-binding protein	BM28_A2038	20.8006	20.6003	NaN	21.0113	20.9788	21.1719	5	NaN	NaN	NaN	NaN	NaN	NaN	0	+	+	57.37	94878000	21	3.26358	6.41882	0.000545036
19	F2HSV2	Cysteine synthase A	cysK BM28_A1955	21.1005	19.6857	21.2041	21.1956	19.3749	NaN	5	NaN	NaN	NaN	NaN	NaN	NaN	0	+	+	151.41	107300000	36	3.15721	6.08511	0.000696282
20	Q2YQP7	Enoyl-CoA hydratase/isomerase (EC 4.2.1.17)	BAB1_2185	21.5572	19.5852	21.4987	19.871	19.9591	NaN	5	NaN	NaN	NaN	NaN	NaN	NaN	0	+	+	43.343	83337000	31	3.14446	6.07019	0.000717035
21	Q2YLD7	DEAD/DEAH box helicase:Helicase, C-terminal:ATP/GTP-binding site motif A (P-loop):Aldehyde dehydrogenase	BAB1_1781	20.5077	NaN	20.2516	20.3791	19.6664	19.2752	5	NaN	NaN	NaN	NaN	NaN	NaN	0	+	+	41.144	36031000	17	3.22495	5.67168	0.000595729
22	F2HST4	50S ribosomal protein L23	rplW BM28_A1242	19.4394	19.4951	18.6249	19.8671	19.9339	NaN	5	NaN	NaN	NaN	NaN	NaN	NaN	0	+	+	74.042	48305000	27	3.21753	5.2184	0.000605998
23	Q2YPW3	Histidine kinase (EC 2.7.13.3)	BAB1_1141	20.2452	18.9982	19.9854	19.1404	18.8319	NaN	5	NaN	NaN	NaN	NaN	NaN	NaN	0	+	+	14.452	21002000	7	3.19295	5.19183	0.000641284
24	F2HV64	Uncharacterized protein	BM28_A1458	18.5698	20.2049	NaN	19.3453	19.5	19.4148	5	NaN	NaN	NaN	NaN	NaN	NaN	0	+	+	10.036	13915000	13	3.20398	5.16414	0.000625198
25	F2HZ71	Repressor protein C	BM28_B0760	19.2377	18.7278	20.3848	18.9878	18.8075	NaN	5	NaN	NaN	NaN	NaN	NaN	NaN	0	+	+	31.458	21004000	7	3.17665	5.01594	0.000665815
26	F2HYE9	GntR family transcriptional regulator	BM28_B0488	20.0338	NaN	20.6526	18.76	18.341	18.1292	5	NaN	NaN	NaN	NaN	NaN	NaN	0	+	+	56.623	26392000	13	3.03132	4.97778	0.00093043
27	F2HYZ2	Rhizopine catabolism protein mocA	BM28_B0681	19.355	18.8529	19.9104	18.7834	NaN	18.9891	5	NaN	NaN	NaN	NaN	NaN	NaN	0	+	+	76.556	15969000	10	3.22396	4.97346	0.000597086
28	Q2YJY3	Cytochrome c heme-binding site:4Fe-4S ferredoxin, iron-sulfur binding domain:Nitrate reductase, beta subunit (EC 1.7.99.4)	narH BAB2_0905	18.9872	18.4596	19.3357	18.5124	18.2598	NaN	5	NaN	NaN	NaN	NaN	NaN	NaN	0	+	+	13.677	11447000	5	3.22164	4.58411	0.000600292
29	F2HQL1	Phenylhydantoinase	hydA BM28_A0308	NaN	18.1928	17.9302	19.5169	18.4271	18.3202	5	NaN	NaN	NaN	NaN	NaN	NaN	0	+	+	26.908	46306000	30	3.17074	4.38953	0.000674933
30	Q2YPM2	NAD binding site:UBA/THIF-type NAD/FAD binding fold:Aromatic-ring hydroxylase	BAB1_0004	18.3253	17.4976	19.9412	18.0852	17.7089	NaN	5	NaN	NaN	NaN	NaN	NaN	NaN	0	+	+	14.989	12583000	2	3.02091	4.25138	0.000952989
31	F2HXW3	Uncharacterized protein	BM28_B0302	25.589	26.55	24.8845	25.7808	26.4911	26.3694	6	NaN	NaN	NaN	NaN	NaN	NaN	0	+	+	147.83	1475400000	138	12.4183	12.7341	3.81695e-13
32	Q2YKU9	Bacterial extracellular solute-binding protein, family 1	BAB2_0547	25.4653	25.5139	26.4192	26.3277	25.3846	25.6063	6	NaN	NaN	NaN	NaN	NaN	NaN	0	+	+	323.31	6210500000	593	13.8612	12.5762	1.37668e-14
33	F2HWU1	Endoribonuclease L-PSP	BM28_B0998	24.7996	25.6146	24.2994	25.433	26.1882	26.5139	6	NaN	NaN	NaN	NaN	NaN	NaN	0	+	+	212.62	1826400000	182	11.2088	12.2648	6.18305e-12
34	F2HVF2	EPTC-inducible aldehyde dehydrogenase	BM28_A0212	26.0025	24.4636	26.9474	26.1265	24.4259	23.9422	6	NaN	NaN	NaN	NaN	NaN	NaN	0	+	+	323.31	1615400000	158	9.57213	12.108	2.67836e-10
35	Q2YKP7	Twin-arginine translocation pathway signal	BAB2_0607	23.7517	25.0503	22.8314	24.2076	24.9228	23.4349	6	NaN	NaN	NaN	NaN	NaN	NaN	0	+	+	22.182	381230000	17	10.4961	10.8231	3.19094e-11
36	F2HU77	Sulfate ABC transporter sulfate-binding protein	BM28_A1344	22.8322	24.1029	24.3509	24.298	24.0969	23.7818	6	NaN	NaN	NaN	NaN	NaN	NaN	0	+	+	309.26	332880000	40	12.2836	10.7004	5.20473e-13
37	F2HS24	Enolase (EC 4.2.1.11) (2-phospho-D-glycerate hydro-lyase) (2-phosphoglycerate dehydratase)	eno BM28_A1140	23.6655	23.4545	23.3632	23.6885	24.502	24.4919	6	NaN	NaN	NaN	NaN	NaN	NaN	0	+	+	141.98	425020000	44	12.7231	10.6509	1.89182e-13
38	Q2YKE7	Biotin/lipoyl attachment:Catalytic domain of components of various dehydrogenase complexes:2-oxo acid dehydrogenase, acyltran (EC 2.3.1.12)	BAB2_0713	24.3288	22.6429	25.3048	23.8759	22.9861	22.264	6	NaN	NaN	NaN	NaN	NaN	NaN	0	+	+	274.19	671350000	141	9.09448	10.3571	8.0449e-10
39	F2HU12	4-hydroxy-tetrahydrodipicolinate synthase (HTPA synthase) (EC 4.3.3.7)	dapA BM28_A0657	23.243	24.1325	22.7625	23.8803	23.204	24.1237	6	NaN	NaN	NaN	NaN	NaN	NaN	0	+	+	30.151	213240000	18	12.1171	10.3477	7.63611e-13
40	F2HZ84	Nickel ABC transporter periplasmic nickel-binding protein	nikA BM28_B0773	23.7172	23.6739	24.0243	23.3893	23.4107	23.077	6	NaN	NaN	NaN	NaN	NaN	NaN	0	+	+	276.05	299730000	98	14.4775	10.3387	3.33067e-15
41	F2HQM5	Uncharacterized protein	BM28_A0954	22.6355	24.4779	22.412	23.1862	24.1674	23.9946	6	NaN	NaN	NaN	NaN	NaN	NaN	0	+	+	86.722	306430000	58	10.3074	10.269	4.92677e-11
42	F2HZD4	Rhizopine-binding protein	BM28_B0823	22.9851	24.2311	22.9139	22.9547	23.7725	23.7069	6	NaN	NaN	NaN	NaN	NaN	NaN	0	+	+	75.616	310300000	34	12.1799	10.2174	6.60805e-13
43	F2HUK3	Leucine aminopeptidase 2, chloroplastic (EC 3.4.11.-) (EC 3.4.11.1) (Leucine aminopeptidase 3, chloroplastic)	BM28_A2169	22.6935	23.6882	22.6492	23.3601	23.2271	22.9581	6	NaN	NaN	NaN	NaN	NaN	NaN	0	+	+	154.04	239300000	107	13.3864	9.88605	4.10783e-14
44	F2HTS3	Extracellular ligand-binding receptor	BM28_A0013	22.9033	22.8147	23.2514	23.0124	22.9955	22.9964	6	NaN	NaN	NaN	NaN	NaN	NaN	0	+	+	323.31	414260000	142	#NAME?	9.78561	0
45	F2HVI7	30S ribosomal protein S9	rpsI BM28_A0800	22.4178	23.1882	22.0441	23.2321	23.2907	23.0934	6	NaN	NaN	NaN	NaN	NaN	NaN	0	+	+	61.918	274600000	45	12.2127	9.66772	6.12843e-13
46	F2HYW9	Putative sugar-binding periplasmic protein	BM28_B0658	23.7071	21.8617	23.0918	23.4246	22.346	22.7689	6	NaN	NaN	NaN	NaN	NaN	NaN	0	+	+	35.606	653440000	48	10.9959	9.65669	1.00959e-11
47	F2HS50	Ribosome-recycling factor (RRF) (Ribosome-releasing factor)	frr BM28_A1166	22.7944	23.0639	22.8322	23.1748	22.526	21.9105	6	NaN	NaN	NaN	NaN	NaN	NaN	0	+	+	8.1814	251690000	29	12.7056	9.50698	1.96954e-13
48	F2HW09	Serine--tRNA ligase (EC 6.1.1.11) (Seryl-tRNA synthetase) (Seryl-tRNA(Ser/Sec) synthetase)	serS BM28_A0892	21.8051	22.9761	22.1463	23.0879	23.1813	22.6734	6	NaN	NaN	NaN	NaN	NaN	NaN	0	+	+	48.876	177940000	42	11.8042	9.435	1.56963e-12
49	F2HRJ9	Carbonic anhydrase (EC 4.2.1.1)	BM28_A1821	22.9806	22.5151	23.4973	22.8243	22.0873	21.3407	6	NaN	NaN	NaN	NaN	NaN	NaN	0	+	+	90.843	185310000	60	10.4522	9.33086	3.5302e-11
50	F2HRF2	Zinc-binding alcohol dehydrogenase family protein	BM28_A1071	21.7605	23.416	20.9322	21.8823	22.5871	22.5922	6	NaN	NaN	NaN	NaN	NaN	NaN	0	+	+	28.769	106450000	35	9.7285	8.98504	1.86851e-10
51	F2HSB5	Uncharacterized protein	BM28_A1927	21.6055	22.806	21.6433	22.1278	22.5525	22.43	6	NaN	NaN	NaN	NaN	NaN	NaN	0	+	+	36.937	127590000	29	12.1204	8.98419	7.57838e-13
52	F2HST9	Elongation factor G (EF-G)	fusA BM28_A1247	22.8727	21.9002	23.1926	22.3395	21.6306	21.2255	6	NaN	NaN	NaN	NaN	NaN	NaN	0	+	+	29.817	153100000	22	10.3003	8.98351	5.00797e-11
53	F2HT47	Addiction module antidote	BM28_A0571	21.8501	21.9812	21.8085	22.2003	22.6914	22.4554	6	NaN	NaN	NaN	NaN	NaN	NaN	0	+	+	194.65	109400000	47	13.5498	8.95447	2.81997e-14
54	F2HTW8	Glyoxalase/bleomycin resistance protein/dioxygenase	BM28_A0058	21.4198	22.7098	20.9635	21.9687	22.4312	22.438	6	NaN	NaN	NaN	NaN	NaN	NaN	0	+	+	68.704	104510000	37	10.6467	8.7785	2.25575e-11
55	Q2YJB6	Putative binding protein BAB2_1146	BAB2_1146	22.2473	21.7184	21.8771	22.275	21.398	21.105	6	NaN	NaN	NaN	NaN	NaN	NaN	0	+	+	65.644	115960000	60	12.1667	8.56015	6.81233e-13
56	F2HW76	Choline ABC transporter periplasmic binding protein	choX BM28_A1585	21.434	21.8709	21.5844	21.6511	21.2835	21.2293	6	NaN	NaN	NaN	NaN	NaN	NaN	0	+	+	10.659	61323000	13	14.8754	8.29886	1.33227e-15
57	F2HXS9	Pollen allergen Poa pIX/Phl pVI, C-terminal protein	BM28_B1176	20.7522	22.6688	20.2874	21.0918	21.4801	21.156	6	NaN	NaN	NaN	NaN	NaN	NaN	0	+	+	76.115	59860000	31	9.49973	8.02937	3.16427e-10
58	Q2YMI9	Cytochrome c oxidase subunit 2 (EC 1.9.3.1)	BAB1_0492	21.4334	20.944	22.1495	21.246	20.8171	20.6871	6	NaN	NaN	NaN	NaN	NaN	NaN	0	+	+	138.59	100640000	19	11.2616	8.00284	5.47518e-12
59	F2HT23	Uncharacterized protein	BM28_A2026	20.9304	22.1115	20.2563	20.8776	21.7655	21.0833	6	NaN	NaN	NaN	NaN	NaN	NaN	0	+	+	135.42	43979000	23	10.2893	7.96076	5.13671e-11
60	Q2YM50	Purine nucleoside permease	BAB1_1563	21.9929	20.8355	21.849	21.2753	20.4078	20.5082	6	NaN	NaN	NaN	NaN	NaN	NaN	0	+	+	52.396	73302000	22	10.2275	7.9348	5.92197e-11
61	F2HSF2	Peptidase U62	BM28_A0484	20.9225	21.4106	21.0181	21.154	20.8689	20.7731	6	NaN	NaN	NaN	NaN	NaN	NaN	0	+	+	181.81	72669000	52	14.8085	7.81456	1.55431e-15
62	F2HRJ5	30S ribosomal protein S16	rpsP BM28_A1817	20.3309	20.681	21.0427	21.6476	21.7469	20.675	6	NaN	NaN	NaN	NaN	NaN	NaN	0	+	+	124.07	50028000	16	10.8759	7.81068	1.33078e-11
63	F2HU70	Bifunctional preprotein translocase subunit SecD/SecF	BM28_A1337	21.5327	20.2792	22.362	21.4987	20.3493	19.924	6	NaN	NaN	NaN	NaN	NaN	NaN	0	+	+	185.73	107390000	35	8.69333	7.78099	2.02616e-09
64	F2HSQ5	OmpA/MotB domain-containing protein	BM28_A1213	21.1046	21.1166	20.7415	21.0427	21.0479	20.6624	6	NaN	NaN	NaN	NaN	NaN	NaN	0	+	+	204.98	55059000	25	15.3525	7.74261	4.44089e-16
65	Q2YKA8	Glyoxalase/Bleomycin resistance protein/dioxygenase domain	BAB2_0756	21.2766	21.0343	22.2756	21.2044	20.0006	19.9068	6	NaN	NaN	NaN	NaN	NaN	NaN	0	+	+	87.64	61676000	20	8.9554	7.7397	1.10814e-09
66	F2HU33	Dihydroorotase (DHOase) (EC 3.5.2.3)	pyrC BM28_A0678	19.7533	21.7852	19.9242	20.4716	21.0863	21.3768	6	NaN	NaN	NaN	NaN	NaN	NaN	0	+	+	24.498	54645000	13	9.18572	7.52289	6.52045e-10
67	F2HZ20	Alanine racemase domain-containing protein	BM28_B0709	20.0804	21.5045	19.3631	20.7735	20.9393	21.4727	6	NaN	NaN	NaN	NaN	NaN	NaN	0	+	+	7.9104	43172000	17	9.0675	7.47894	8.56055e-10
68	F2HVQ0	Uncharacterized protein	BM28_A0863	21.1675	19.9916	22.1173	20.2067	20.121	19.9769	6	NaN	NaN	NaN	NaN	NaN	NaN	0	+	+	116.72	50978000	23	8.84453	7.38682	1.43043e-09
69	Q2YPF2	Arginine/ornithine transport operon protein aot	BAB1_0317	21.8147	19.5285	21.4953	19.8788	19.7791	19.8893	6	NaN	NaN	NaN	NaN	NaN	NaN	0	+	+	22.966	54290000	25	8.18059	7.1876	6.59804e-09
70	Q2YNM5	5'-nucleotidase SurE (EC 3.1.3.5) (Nucleoside 5'-monophosphate phosphohydrolase)	surE BAB1_0905	20.4846	20.6123	20.4982	20.1024	20.2653	19.8329	6	NaN	NaN	NaN	NaN	NaN	NaN	0	+	+	57.953	47324000	30	13.3418	7.08931	4.55191e-14
71	F2HWF0	RNA polymerase sigma factor	BM28_A1659	20.862	19.6197	21.6357	20.1323	19.8691	19.4733	6	NaN	NaN	NaN	NaN	NaN	NaN	0	+	+	61.038	52244000	13	8.83434	7.05534	1.46439e-09
72	F2HS19	Acetyltransferase component of pyruvate dehydrogenase complex (EC 2.3.1.12)	BM28_A1135	20.4624	20.1987	20.2576	20.4243	20.1446	19.9989	6	NaN	NaN	NaN	NaN	NaN	NaN	0	+	+	19.295	34917000	26	15.6536	7.03776	2.22045e-16
73	Q2YPS8	Electron transport protein SCO1/SenC	BAB1_1435	21.0445	20.0311	20.7899	19.7876	20.0201	19.3027	6	NaN	NaN	NaN	NaN	NaN	NaN	0	+	+	96.207	34177000	15	9.84487	6.95267	1.42934e-10
74	Q2YPK6	Uncharacterized protein BAB1_0366	BAB1_0366	19.0201	20.3903	18.4032	20.0922	20.2044	20.4639	6	NaN	NaN	NaN	NaN	NaN	NaN	0	+	+	15.2	25924000	21	8.43834	6.55236	3.64468e-09
75	F2HR03	ABC transporter-like protein	BM28_A1782	20.2618	19.4007	20.1362	20.2412	19.0458	19.1686	6	NaN	NaN	NaN	NaN	NaN	NaN	0	+	+	46.731	33922000	19	10.1298	6.49906	7.4162e-11
76	F2HWQ3	Keto-hydroxyglutarate-aldolase/keto-deoxy-phosphogluconate aldolase	BM28_B0087	18.8925	19.5844	19.8328	19.3762	19.0293	18.8823	6	NaN	NaN	NaN	NaN	NaN	NaN	0	+	+	29.966	21456000	13	11.3769	6.05624	4.1982e-12
77	Q2YIM4	NAD(P) transhydrogenase subunit beta (EC 1.6.1.2) (Nicotinamide nucleotide transhydrogenase subunit beta)	pntB BAB2_0263	20.614	18.0961	19.1242	20.8146	18.2228	18.0039	6	NaN	NaN	NaN	NaN	NaN	NaN	0	+	+	7.0145	20963000	12	6.30948	5.93592	4.90363e-07
78	Q2YLZ2	UDP-3-O-[3-hydroxymyristoyl] N-acetylglucosamine deacetylase (EC 3.5.1.-) (UDP-3-O-acyl-GlcNAc deacetylase)	lpxC BAB1_1443	18.6686	18.3813	18.8406	18.2905	18.7226	18.6179	6	NaN	NaN	NaN	NaN	NaN	NaN	0	+	+	30.983	17849000	6	13.5891	5.37691	2.57572e-14
79	F2HQN2	Uncharacterized protein	BM28_A0961	17.8732	18.669	18.0896	18.4794	17.861	18.4504	6	NaN	NaN	NaN	NaN	NaN	NaN	0	+	+	37.022	15964000	16	11.1822	5.02709	6.57319e-12
80	F2HR00	Leu/Ile/Val-binding protein	BM28_A1779	22.9404	23.4349	22.2831	NaN	23.456	23.442	5	NaN	NaN	22.9932	NaN	NaN	NaN	1	+	+	66.792	349110000	50	1.75919	6.62054	0.0174104
81	Q2YR93	Uncharacterized protein	BAB1_1976	22.3682	21.8331	22.7371	NaN	22.7263	23.1406	5	NaN	NaN	NaN	22.2511	NaN	NaN	1	+	+	25.984	257270000	19	1.79274	6.28569	0.0161162
82	Q2YPM1	Pyridine nucleotide-disulphide oxidoreductase, class I:D-isomer specific 2-hydroxyacid dehydrogenase, NAD binding domain	BAB1_0005	21.5883	20.1195	21.2974	19.6191	20.0708	NaN	5	NaN	NaN	NaN	NaN	NaN	19.0268	1	+	+	17.665	54844000	10	2.04533	5.13806	0.00900877
83	Q2YNJ7	Beta-N-acetylhexosaminidase (EC 3.2.1.52)	BAB1_0898	20.0739	NaN	19.6415	20.2613	19.7937	19.337	5	NaN	19.1654	NaN	NaN	NaN	NaN	1	+	+	12.101	41161000	15	1.89975	4.51701	0.0125965
84	Q2YKL9	Dihydroorotase (DHOase) (EC 3.5.2.3)	pyrC BAB2_0640	19.8601	18.9181	19.5589	19.287	19.0426	NaN	5	NaN	NaN	NaN	NaN	18.9049	NaN	1	+	+	21.558	33861000	17	1.849	4.15362	0.0141579
85	F2HUG9	DNA starvation/stationary phase protection protein Dps	BM28_A2135	25.112	27.1476	24.6624	25.4786	26.5169	26.4175	6	19.1641	NaN	NaN	NaN	NaN	NaN	1	+	+	302.09	1089900000	47	6.16826	11.6868	6.78798e-07
86	F2HYX7	Family 1 extracellular solute-binding protein	BM28_B0666	23.3758	23.3889	24.1224	23.1406	23.2946	22.911	6	NaN	NaN	NaN	NaN	19.5415	NaN	1	+	+	222.26	289950000	73	5.17234	9.10698	6.72456e-06
87	Q2YRW5	NADPH-dependent 7-cyano-7-deazaguanine reductase (EC 1.7.1.13) (7-cyano-7-carbaguanine reductase) (NADPH-dependent nitrile oxidoreductase) (PreQ(0) reductase)	queF BAB1_1206	21.2578	20.7341	21.5233	21.0029	20.6031	19.9468	6	NaN	NaN	NaN	NaN	NaN	17.7363	1	+	+	68.481	75266000	42	5.26752	6.88027	5.40102e-06
88	F2HXV5	Nitrate reductase subunit alpha	narG BM28_B0294	21.8663	20.2018	21.1761	20.3426	19.7479	19.322	6	NaN	NaN	NaN	NaN	NaN	18.7783	1	+	+	58.722	50756000	22	4.04054	6.30472	9.10886e-05
89	Q2YL87	Bacterial regulatory protein, GntR family	BAB2_0022	20.963	19.0229	21.1391	21.174	19.1673	19.1389	6	NaN	NaN	NaN	NaN	17.9204	NaN	1	+	+	21.73	76568000	14	4.30666	6.10578	4.93565e-05
90	Q2YMM2	5-hydroxyisourate hydrolase (HIU hydrolase) (HIUHase) (EC 3.5.2.17)	BAB1_0532	20.1951	20.4292	20.6655	19.6647	19.8495	19.5296	6	19.4196	NaN	NaN	NaN	NaN	NaN	1	+	+	47.421	56991000	30	3.5996	5.81065	0.000251418
91	Q2YKX1	IolB protein KO: K03337 IolB protein	BAB2_0523	19.9035	20.9881	19.6494	19.4528	19.306	19.3167	6	NaN	NaN	NaN	NaN	NaN	19.3494	1	+	+	10.077	24896000	8	3.42352	5.53617	0.000377118
92	Q2YIM5	Antifreeze protein, type I:Pollen allergen Poa pIX/Phl pVI, C-terminal	pntAB BAB2_0262	18.3704	18.2397	21.4598	18.1839	18.5028	18.2228	6	NaN	17.9174	NaN	NaN	NaN	NaN	1	+	+	91.981	27520000	11	3.34137	4.83533	0.000455647
93	F2HYR5	Amidohydrolase 3	BM28_B0604	27.3639	28.8067	26.1061	27.2783	28.5745	28.6151	6	15.0696	13.5111	NaN	NaN	NaN	NaN	2	+	+	323.31	4380900000	333	9.93494	14.2207	1.1616e-10
94	F2HQQ4	Porin	BM28_A0983	23.8099	25.1615	23.6561	24.9949	25.5355	25.4169	6	NaN	NaN	NaN	20.2407	NaN	22.8136	2	+	+	323.31	960710000	137	3.16353	8.78009	0.000686226
95	Q2YP60	ABC transporter substrate-binding protein KO: K02051 sulfonate/nitrate transport system substrate-binding protein	BAB1_0214	18.0869	18.4831	17.8543	19.0894	18.4967	18.9206	6	17.3199	NaN	NaN	NaN	NaN	17.5647	2	+	+	7.8468	9813900	9	2.76179	3.86772	0.00173066
96	Q2YNC8	NADH-quinone oxidoreductase subunit B (EC 1.6.5.11) (NADH dehydrogenase I subunit B) (NDH-1 subunit B)	nuoB BAB1_0823	18.7208	18.3765	18.5557	18.7181	18.0316	18.0704	6	18.7341	NaN	NaN	18.5156	NaN	NaN	2	+	+	49.973	21069000	20	1.84298	3.39723	0.0143555
97	Q2YPD7	Urease subunit gamma 1 (EC 3.5.1.5) (Urea amidohydrolase subunit gamma 1)	ureA1 ureA ureA-1 BAB1_0298	21.5785	22.431	21.9289	22.4299	22.6483	22.68	6	18.3906	18.7353	NaN	NaN	19.1229	NaN	3	+	+	44.108	101450000	34	3.28384	6.30296	0.000520186
98	Q2YNA6	Uncharacterized protein	BAB1_0776	21.1928	21.1883	21.3222	20.5995	20.3616	20.4482	6	NaN	NaN	NaN	19.2361	18.9279	18.9866	3	+	+	145.38	64545000	38	2.30151	4.72203	0.00499453
99	Q2YL19	Glutamine synthetase, catalytic domain (EC 6.3.1.2)	BAB2_0471	21.2573	18.7829	21.9631	19.4428	19.1386	18.7641	6	18.212	18.7827	NaN	NaN	NaN	18.617	3	+	+	26.355	50873000	18	1.90952	4.01787	0.0123162
100	F2HWB4	7-alpha-hydroxysteroid dehydrogenase	BM28_A1623	21.3798	18.874	21.0036	18.8941	18.7448	19.581	6	NaN	NaN	NaN	18.1709	18.4119	19.2254	3	+	+	100.69	46902000	33	1.8339	3.83984	0.0146589
101	F2HYL6	Bifunctional protein GlmU	glmU BM28_B0555	20.0566	18.7462	20.4114	19.8467	18.7518	18.7501	6	18.2832	NaN	NaN	18.363	NaN	18.5445	3	+	+	29.112	30879000	19	1.88649	3.62367	0.0129872
102	Q2YKX0	IolE protein KO: K03335 IolE protein	BAB2_0524	21.4041	19.1339	19.3773	19.2204	19.0233	18.7634	6	NaN	NaN	18.5779	NaN	18.5155	18.5828	3	+	+	25.663	30203000	9	1.77214	3.6027	0.016899
103	Q2YKC1	Molybdenum cofactor biosynthesis protein	BAB2_0741	20.2446	18.8463	19.8094	18.7412	18.4127	18.2971	6	NaN	18.3074	18.3014	18.2087	NaN	NaN	3	+	+	87.49	24491000	19	1.73965	3.31731	0.0182116
104	F2HZG8	Pentapeptide MXKDX repeat protein	BM28_B0021	26.1817	26.4907	25.4862	26.925	26.6301	26.7145	6	21.353	20.29	NaN	NaN	20.5396	20.3553	4	+	+	88.187	2322400000	88	3.39404	8.24503	0.000403609
105	Q2YNC4	K(+)-insensitive pyrophosphate-energized proton pump (EC 3.6.1.1) (Membrane-bound proton-translocating pyrophosphatase) (Pyrophosphate-energized inorganic pyrophosphatase)	hppA BAB1_0793	22.6689	22.1735	23.0619	22.5369	21.5176	20.2393	6	16.9944	17.357	17.4579	NaN	NaN	17.4987	4	+	+	221.51	165340000	50	4.04698	6.07837	8.97465e-05
106	F2HZ79	Acyl-CoA dehydrogenase	BM28_B0768	24.4871	20.9168	24.231	22.1193	21.1433	19.6227	6	18.1222	NaN	16.492	18.4418	NaN	18.0346	4	+	+	171.02	245110000	54	2.99432	5.83493	0.00101316
107	Q2YKD8	ATPase, BadF/BadG/BcrA/BcrD type (EC 2.7.1.59)	BAB2_0724	23.2497	21.4147	23.2132	21.831	21.1588	21.6234	6	19.7774	NaN	18.6559	19.0991	NaN	19.3493	4	+	+	132.45	229530000	65	2.35666	4.86484	0.00439889
108	Q2YQK5	Dynamin:ATP/GTP-binding site motif A (P-loop):Cobalamin synthesis protein/P47K	BAB1_1327	21.274	19.2639	21.7612	20.352	19.7742	19.0875	6	17.3233	NaN	NaN	17.2565	18.0003	18.0866	4	+	+	44.823	43824000	18	2.51762	4.07098	0.00303654
109	Q2YLG1	Pyruvate carboxylase (EC 6.4.1.1)	pyc BAB1_1791	21.7059	20.477	22.9612	20.9526	20.6296	19.8393	6	20.5004	18.8936	19.279	NaN	NaN	18.3051	4	+	+	113.69	146290000	53	1.72345	3.86127	0.0189037
110	Q2YMW1	Uncharacterized protein	BAB1_0650	21.1971	22.7896	21.1437	22.226	22.9987	21.6618	6	17.4586	NaN	16.5367	17.0914	17.9813	18.0699	5	+	+	189.03	283940000	74	4.17664	5.27817	6.65825e-05
111	F2HZ74	Acyl-CoA dehydrogenase domain-containing protein	BM28_B0763	22.7409	21.8706	22.655	21.9793	22.138	21.5241	6	18.7263	NaN	19.272	19.8168	19.4602	19.2971	5	+	+	102.51	120770000	50	2.3772	3.85426	0.00419566
112	Q2YPD5	Urease subunit alpha 1 (EC 3.5.1.5) (Urea amidohydrolase subunit alpha 1)	ureC1 BAB1_0300	20.6916	20.7438	22.2263	21.6439	21.9316	19.9074	6	18.883	NaN	18.9487	18.7075	18.132	18.0181	5	+	+	56.542	70719000	35	2.346	3.54089	0.00450821
113	F2HY58	Outer membrane protein Omp31	BM28_B0397	25.4987	26.6698	25.1001	25.9074	26.5693	26.4926	6	18.7088	17.301	18.4265	19.1104	18.601	18.0388	6	+	+	323.31	1275000000	158	8.8546	7.67525	1.39764e-09
114	F2HYA4	Cupin domain protein	BM28_B0443	24.9079	26.4188	24.6595	25.6343	26.0823	25.9271	6	20.4937	20.9606	20.7217	20.5999	20.7922	20.2486	6	+	+	133.21	1168400000	188	7.88456	4.96889	1.30449e-08
115	Q2YK77	Peptide methionine sulfoxide reductase MsrB (EC 1.8.4.12) (Peptide-methionine (R)-S-oxide reductase)	msrB BAB2_0792	21.192	22.99	22.2173	22.1916	21.9166	22.0034	6	18.3147	17.5028	17.9803	17.6155	17.3218	17.4953	6	+	+	71.771	106480000	42	7.61818	4.38012	2.40892e-08
116	F2HZ16	Substrate-binding region of ABC-type glycine betaine transport system	BM28_B0705	26.4736	27.6624	26.1794	27.3551	27.7723	27.9754	6	23.3457	23.1308	23.2693	23.157	23.4059	22.9585	6	+	+	323.31	6563300000	583	6.87394	4.02517	1.33678e-07
117	F2HUP7	Uncharacterized protein	BM28_A0114	24.5031	23.4644	24.7085	22.0087	23.0808	20.1183	6	19.314	19.1434	18.8828	19.0707	18.4077	19.0165	6	+	+	53.439	294580000	28	3.66473	4.00812	0.000216408
118	F2HYW0	Family 3 extracellular solute-binding protein	BM28_B0649	25.4666	25.7296	26.2389	25.9848	25.5125	25.8351	6	22.8257	22.5732	21.3917	21.26	22.5243	21.4134	6	+	+	323.31	2706300000	406	6.55436	3.79651	2.79022e-07
119	Q2YIX5	Uncharacterized protein	BAB2_0388	23.7124	21.0177	23.8258	21.5074	21.2638	19.0038	6	18.1888	17.8999	17.7452	18.0848	17.4711	18.8994	6	+	+	186.29	169450000	46	3.12731	3.67363	0.000745916
120	F2HZV1	Alanine dehydrogenase/PNT domain-containing protein	BM28_B0947	23.5664	20.4683	23.9144	22.231	21.3402	20.5849	6	19.1296	17.9777	18.7509	18.6692	17.9204	19.8924	6	+	+	323.31	236660000	73	3.1902	3.29418	0.000645358
121	F2HVN1	Glutaredoxin	BM28_A0844	24.6372	24.4633	25.0972	23.6539	24.0491	23.6375	6	21.82	20.7608	21.3342	21.0639	20.8884	21.3445	6	+	+	323.31	742960000	120	6.09359	3.05443	8.06146e-07
122	F2HS78	Glyoxalase/bleomycin resistance protein/dioxygenase	BM28_A1890	23.3914	25.4149	23.7426	24.9675	24.6741	25.4431	6	21.433	21.8677	21.6829	21.7212	21.5495	21.1326	6	+	+	127.86	988810000	166	5.06112	3.04113	8.68721e-06
123	F2HSI8	Polysaccharide deacetylase	BM28_A0520	23.1919	24.2487	23.2816	23.7186	24.4725	23.7998	6	21.6974	21.1915	20.3363	20.7934	20.6554	20.3845	6	+	+	180.65	336140000	75	5.75618	2.94243	1.75316e-06
124	F2HQL2	Allantoate amidohydrolase	BM28_A0309	23.251	24.1501	23.4941	23.783	23.7541	24.2763	6	20.0845	20.4376	21.0004	21.2465	21.0102	21.4652	6	+	+	126.25	660720000	201	6.19882	2.91072	6.32673e-07
125	F2HWP3	Band 7 protein	BM28_B0077	22.7116	22.0763	21.2887	22.2227	21.3751	21.0361	6	18.9578	19.0025	18.7524	18.5886	18.646	19.4932	6	+	+	98.063	106660000	54	5.66487	2.87831	2.16337e-06
126	F2HU40	Uncharacterized protein	BM28_A0685	22.5252	23.8899	23.1294	23.2706	23.137	22.9787	6	21.4233	21.0696	20.4509	20.2906	21.1006	20.2991	6	+	+	20.067	238930000	55	5.32974	2.38278	4.6802e-06
127	F2HY41	Extracellular solute-binding protein	BM28_B0380	22.5442	20.9727	23.0859	20.8395	20.429	20.0395	6	18.4446	18.979	18.3838	18.748	19.3318	19.8831	6	+	+	275.56	164990000	69	2.80268	2.35676	0.00157515
128	F2HUS3	S-(hydroxymethyl)glutathione dehydrogenase (EC 1.1.1.284)	BM28_A0140	24.5183	23.4666	24.9632	24.2679	23.3704	22.9831	6	21.2573	21.8878	21.273	21.4739	21.6501	22.0581	6	+	+	323.31	956920000	270	4.33922	2.32823	4.57908e-05
129	Q2YRH9	Response regulator receiver	BAB1_1671	23.9033	23.2921	24.0518	23.4414	22.4955	21.5125	6	20.8719	21.2926	20.4893	20.6682	20.9685	20.8036	6	+	+	52.191	446020000	59	3.62642	2.26709	0.000236362
130	Q2YRP7	Ribosome-recycling factor (RRF) (Ribosome-releasing factor)	frr BAB1_1181	26.2454	26.6068	26.2608	26.578	26.4629	26.191	6	24.0092	24.276	24.4602	24.1815	24.0372	23.8588	6	+	+	323.31	3781800000	560	8.59498	2.25369	2.54107e-09
131	Q2YRK5	Malate synthase G (EC 2.3.3.9)	glcB BAB1_1663	23.4737	23.3357	23.7974	23.4202	22.8454	22.9582	6	20.7848	21.494	20.7917	21.1793	21.1999	21.2675	6	+	+	164.1	389790000	152	6.50762	2.18556	3.1073e-07
132	Q2YPD2	Urease accessory protein UreG 1	ureG1 BAB1_0303	22.687	23.3701	22.1632	22.4463	23.1485	22.8328	6	20.7153	20.3063	19.157	21.9227	20.1583	21.5082	6	+	+	120.95	176220000	69	3.15799	2.14668	0.000695046
133	Q2YKR5	sn-glycerol-3-phosphate-binding periplasmic protein UgpB	ugpB BAB2_0585	24.6728	24.7625	25.4889	25.1591	24.7788	25.1123	6	23.1678	22.6008	22.7545	22.7034	22.8254	23.0676	6	+	+	323.31	1519800000	271	7.08735	2.14248	8.17811e-08
134	Q2YQT2	Ferritin:DNA-binding protein Dps	BAB1_2150	28.1517	29.9383	28.0323	29.335	29.1257	29.5501	6	28.3335	27.9056	26.7655	26.128	26.3623	25.8197	6	+	+	323.31	16635000000	870	2.67679	2.13644	0.00210481
135	Q2YRN2	Carbamoyl-phosphate synthase large chain (EC 6.3.5.5) (Carbamoyl-phosphate synthetase ammonia chain)	carB BAB1_1508	23.0309	22.1837	22.8449	22.569	20.9616	20.5406	6	19.8086	19.9833	19.3905	20.1206	20.192	19.902	6	+	+	88.467	280920000	91	3.17193	2.1223	0.000673091
136	F2HTS9	Ivd, isovaleryl-CoA dehydrogenase	BM28_A0019	25.2019	24.127	25.7701	25.1946	24.3298	23.6608	6	22.5393	22.7146	22.3411	22.5305	22.7667	22.7627	6	+	+	323.31	1267300000	274	4.06106	2.10489	8.68846e-05
137	F2HSU5	DNA-directed RNA polymerase subunit beta' (RNAP subunit beta') (EC 2.7.7.6) (RNA polymerase subunit beta') (Transcriptase subunit beta')	rpoC BM28_A1253	24.2974	22.777	24.4606	23.6903	22.68	22.1924	6	21.2869	21.2959	20.9393	21.0503	21.372	21.8211	6	+	+	323.31	580860000	251	3.3466	2.05538	0.00045019
138	F2HRX0	Uncharacterized protein	BM28_A0461	23.2195	24.212	23.3738	23.8234	24.3051	24.0454	6	22.5099	21.9337	21.8542	21.8425	21.8047	21.7216	6	+	+	97.053	562050000	101	5.25482	1.88544	5.56138e-06
139	Q2YIQ8	Ketose-bisphosphate aldolase, class-II:Fructose-bisphosphate aldolase, class II, Calvin cycle subtype (EC 4.1.2.13)	fbaA BAB2_0365	24.2169	23.5686	24.013	23.5339	23.6538	23.2036	6	22.1769	21.718	21.6599	21.7218	21.6998	21.9657	6	+	+	291.85	961120000	251	6.19041	1.8746	6.45041e-07
140	F2HQJ0	Histidinol dehydrogenase (HDH) (EC 1.1.1.23)	hisD BM28_A0287	22.623	22.1102	23.406	22.52	22.0754	21.8601	6	20.2029	20.7848	20.2749	20.6597	20.2216	21.5753	6	+	+	159.68	230970000	73	3.75391	1.81255	0.000176236
141	Q2YLG9	ATP/GTP-binding site motif A (P-loop):Bacterial NAD-glutamate dehydrogenase (EC 1.4.1.2)	BAB1_1827	24.034	22.3272	24.0741	23.1484	21.9844	21.2979	6	20.8859	21.2744	21.2464	20.983	20.5103	21.1883	6	+	+	323.31	427170000	155	2.4315	1.79629	0.00370257
142	Q2YIG7	NADH:flavin oxidoreductase/NADH oxidase	BAB2_0335	25.3321	24.8738	25.3056	24.7524	24.4828	24.1314	6	23.1094	22.9759	22.8626	23.185	23.0141	22.972	6	+	+	323.31	879100000	181	5.43907	1.79319	3.63856e-06
143	Q2YLY8	D-alanine--D-alanine ligase (EC 6.3.2.4) (D-Ala-D-Ala ligase) (D-alanylalanine synthetase)	ddl BAB1_1447	20.903	20.0887	20.8841	20.6847	19.0741	19.2106	6	18.9854	18.3871	18.1873	18.2059	18.1778	18.1759	6	+	+	21.97	53471000	24	3.22358	1.78765	0.000597619
144	Q2YNQ4	ATP/GTP-binding site motif A (P-loop):ABC transporter:AAA ATPase	BAB1_0949	21.486	20.2885	21.0521	21.24	20.7383	19.6463	6	18.9548	18.9785	19.0768	18.8173	18.9809	19.4507	6	+	+	128.71	84005000	59	3.78583	1.69871	0.000163747
145	Q2YLA2	Hydroxypyruvate isomerase (EC 5.3.1.22)	BAB2_0144	22.5569	24.2928	22.4035	23.3251	24.2073	24.0038	6	21.5873	21.7401	22.332	21.2217	22.2209	21.5404	6	+	+	243.56	398250000	160	2.88389	1.69116	0.0013065
146	Q2YQR9	Transcription termination/antitermination protein NusA	nusA BAB1_2163	24.1173	21.8988	24.1688	24.093	23.2673	23.117	6	21.1396	22.576	21.5833	21.4717	21.848	21.9942	6	+	+	113.42	511670000	90	2.62769	1.67487	0.00235675
147	Q2YP67	Bacterial extracellular solute-binding protein, family 1	BAB1_0238	24.6389	24.5875	24.7572	24.7402	24.6095	24.5677	6	22.9024	23.0847	22.7997	22.9905	22.9376	23.1979	6	+	+	323.31	1351400000	288	9.65619	1.66469	2.20705e-10
148	F2HQW9	Pyruvate kinase (EC 2.7.1.40)	BM28_A1748	22.9831	21.1542	23.1419	21.6542	21.1986	20.3197	6	19.913	20.4444	19.7726	19.8388	19.9663	20.5307	6	+	+	119.68	207140000	70	2.25774	1.66432	0.00552406
149	Q2YP10	Phosphoenolpyruvate-dependent sugar phosphotransferase system, EIIA 2:PTS IIA-like nitrogen-regulatory protein PtsN (EC 2.7.1.69)	BAB1_0160	23.096	22.2742	23.125	22.4498	22.0155	20.2197	6	21.1561	20.6556	20.9538	20.2844	20.4723	19.7031	6	+	+	108.93	191380000	52	2.1918	1.65913	0.00642991
150	Q2YR09	Transcription termination factor Rho (EC 3.6.4.-) (ATP-dependent helicase Rho)	rho BAB1_2065	23.3299	21.8378	23.3268	22.6319	21.815	20.9314	6	20.909	20.387	20.5888	20.8326	20.3287	20.9622	6	+	+	281.61	337440000	164	2.64111	1.64408	0.00228503
151	F2HT14	Acetyl-coenzyme A carboxylase carboxyl transferase subunit alpha (ACCase subunit alpha) (Acetyl-CoA carboxylase carboxyltransferase subunit alpha) (EC 6.4.1.2)	accA BM28_A2017	22.9908	22.0937	23.6171	22.6901	21.6409	20.8809	6	20.6673	20.9516	20.2868	20.259	20.4278	21.4898	6	+	+	164.78	229620000	95	2.36527	1.63853	0.00431255
152	Q2YIL0	D-amino acid dehydrogenase (EC 1.4.99.1)	dadA BAB2_0311	22.7975	21.3437	22.4207	21.5179	20.9574	19.6144	6	19.7796	19.7349	19.4106	19.78	19.6298	20.5668	6	+	+	154.8	109380000	32	2.11585	1.62498	0.00765863
153	Q2YPG8	dCTP deaminase (EC 3.5.4.13)	BAB1_0336	21.7787	19.8071	22.5359	21.2343	19.8364	19.0624	6	19.2384	19.2929	19.0632	18.7975	19.0225	19.1292	6	+	+	42.779	105550000	20	1.81739	1.61853	0.0152268
154	Q2YQ34	Proline-rich region:Proline-rich extensin	BAB1_1058	20.8988	19.4098	22.2312	20.4502	20.1813	20.504	6	19.2654	18.803	18.9554	18.972	19.0608	18.9883	6	+	+	57.811	72264000	29	2.7031	1.60505	0.00198105
155	Q2YKQ9	Leu/Ile/Val-binding protein homolog 6	BAB2_0593	21.9108	22.0614	22.4454	22.1474	21.8947	21.7835	6	20.3383	20.4239	20.7323	20.3255	20.533	20.284	6	+	+	323.31	206790000	119	7.01799	1.60103	9.59432e-08
156	Q2YQR7	Translation initiation factor IF-2	infB BAB1_2165	22.9479	21.5772	23.7469	22.1035	20.9456	20.0813	6	20.1555	20.2337	21.0329	19.586	20.1441	20.6587	6	+	+	251.07	276660000	97	1.69266	1.59858	0.0202929
157	Q2YM15	DNA-directed RNA polymerase subunit beta (RNAP subunit beta) (EC 2.7.7.6) (RNA polymerase subunit beta) (Transcriptase subunit beta)	rpoB BAB1_1264	24.7482	23.8505	24.9501	24.4968	23.4944	23.0031	6	22.8069	22.5937	22.4029	21.8636	22.8396	22.5038	6	+	+	323.31	881550000	315	3.01476	1.58876	0.000966575
158	F2HZ72	Fatty acid oxidation complex subunit alpha	BM28_B0761	23.4113	22.4777	23.6772	22.7938	22.0631	21.385	6	20.916	21.3015	20.9905	20.9062	20.9451	21.5416	6	+	+	323.31	274480000	85	2.74996	1.53454	0.00177844
159	F2HR76	Carboxynorspermidine dehydrogenase	BM28_A0367	23.3242	22.2016	22.9865	21.8551	21.0259	21.0087	6	20.9958	21.3313	19.5302	21.2449	19.765	20.4232	6	+	+	148.62	184080000	68	1.8791	1.51861	0.0132098
160	Q2YMP3	GDP-mannose 4,6-dehydratase (EC 4.2.1.47) (GDP-D-mannose dehydratase)	gmd BAB1_0545	24.5022	24.3291	24.711	24.0322	23.635	23.5388	6	22.649	22.7079	22.4172	22.9031	22.4307	22.7232	6	+	+	246.02	743200000	192	4.51121	1.48621	3.08171e-05
161	F2HU89	Periplasmic binding protein/LacI transcriptional regulator	BM28_A1356	24.4118	25.8834	24.8769	26.119	25.6591	27.1916	6	24.002	24.374	24.3367	24.3115	24.2039	24.0019	6	+	+	323.31	1557900000	323	2.3654	1.48531	0.00431125
162	Q2YKT4	Periplasmic binding protein	BAB2_0564	20.6112	20.7613	21.1983	20.6379	19.9181	20.1207	6	19.0057	18.7586	19.3695	18.8263	18.9793	19.5329	6	+	+	75.514	62147000	26	4.14634	1.46254	7.13933e-05
163	Q2YPQ8	Argininosuccinate synthase (EC 6.3.4.5) (Citrulline--aspartate ligase)	argG BAB1_0071	21.6442	19.5412	22.5778	19.9576	19.7377	19.7348	6	19.4548	19.1966	18.7892	19.1971	19.0541	18.7657	6	+	+	178.99	138690000	56	1.69573	1.45597	0.0201499
164	F2HSS1	50S ribosomal protein L6	rplF BM28_A1229	23.2659	23.8402	22.7996	23.7437	23.8038	23.7335	6	22.8315	21.6533	22.7135	21.6818	22.1811	21.3937	6	+	+	165.53	632420000	129	3.20367	1.45528	0.00062565
165	Q2YL65	Thiolase (EC 2.3.1.16)	BAB2_0443	23.7268	22.46	24.1135	23.0426	22.4503	21.8329	6	21.4249	21.7806	21.0956	21.2291	21.7006	21.7245	6	+	+	323.31	340720000	140	2.53027	1.44517	0.00294935
166	Q2YRV0	Isocitrate dehydrogenase [NADP] (EC 1.1.1.42)	BAB1_1221	21.7784	21.4937	21.9735	21.5733	20.7468	21.8823	6	20.2516	21.0249	20.2199	19.4187	19.5872	20.2868	6	+	+	154.78	208510000	76	3.18506	1.44314	0.000653036
167	Q2YLF8	Leu/Ile/Val-binding protein homolog 1	BAB1_1794	23.7084	24.928	24.1795	24.555	24.8884	25.063	6	23.0808	23.0189	23.3159	23.0362	23.2122	23.0246	6	+	+	323.31	1525700000	273	4.1979	1.43894	6.34019e-05
168	Q2YKE6	Transketolase, central region:Transketolase, C terminal (EC 1.2.4.4)	BAB2_0714	21.9802	21.0546	22.2957	21.8653	19.899	20.0507	6	19.9087	20.0167	20.1635	19.6705	19.6511	19.2427	6	+	+	149.33	333020000	116	2.03197	1.41538	0.00929021
169	F2HRA3	3-deoxy-7-phosphoheptulonate synthase	BM28_A1022	21.4185	20.8442	22.1096	20.1713	21.2032	19.5081	6	19.6756	20.0434	19.1819	19.2678	19.371	19.3583	6	+	+	81.528	80453000	26	2.22701	1.39284	0.00592914
170	F2HS18	Dihydrolipoyl dehydrogenase (EC 1.8.1.4)	lpdA BM28_A1134	23.2914	21.5002	23.0276	22.4373	21.2715	20.7454	6	20.1371	20.8178	20.4794	20.8164	20.2492	21.6807	6	+	+	176.98	210600000	60	1.74835	1.34883	0.0178504
171	Q2YNI5	Beta-ketoacyl synthase:ATP/GTP-binding site motif A (P-loop) (EC 2.3.1.41)	BAB1_0872	21.3518	20.0406	21.5433	22.4736	20.8496	20.5901	6	19.4911	20.2141	19.7895	19.7418	19.7453	19.7762	6	+	+	35.672	88125000	52	2.43049	1.34851	0.00371117
172	Q2YJ78	Type IV secretion system protein virB8	virB8 BAB2_0061	23.8015	23.2052	22.5388	22.2292	22.6326	21.9781	6	21.9976	21.4878	21.1757	21.4294	20.7019	21.5402	6	+	+	130.11	180660000	40	2.69383	1.34212	0.00202382
173	Q2YJP0	Methylglyoxal synthase (MGS) (EC 4.2.3.3)	mgsA BAB2_1009	22.5155	23.781	23.6385	23.6857	23.8058	23.665	6	22.2955	21.9521	22.0569	22.0368	22.255	22.4797	6	+	+	174.9	651330000	92	3.96272	1.33591	0.000108963
174	Q2YRU0	DNA-directed RNA polymerase subunit alpha (RNAP subunit alpha) (EC 2.7.7.6) (RNA polymerase subunit alpha) (Transcriptase subunit alpha)	rpoA BAB1_1231	24.3629	23.1141	23.9406	23.9421	23.1547	22.3723	6	21.9831	22.1543	22.3262	22.0254	22.3642	22.1386	6	+	+	83.823	585300000	149	2.81599	1.31581	0.0015276
175	Q2YLQ2	Succinate dehydrogenase iron-sulfur subunit (EC 1.3.5.1)	BAB1_1900	21.7616	21.2799	22.0567	21.6008	20.8906	20.0299	6	19.77	20.4147	19.7875	19.6963	19.862	20.2145	6	+	+	84.594	126550000	49	2.67113	1.31239	0.0021324
176	Q2YMW6	NAD binding site:ATP/GTP-binding site motif A (P-loop):Aromatic-ring hydroxylase:Electron transfer flavoprotein-ubiquinone ox (EC 1.5.5.1)	BAB1_0645	19.7965	20.1653	20.3872	19.5173	19.6086	19.2695	6	18.0721	18.4785	18.5321	18.5829	18.5993	18.614	6	+	+	35.821	39306000	26	4.36937	1.31095	4.27198e-05
177	Q2YNB7	Bacterial regulatory protein, MerR family	BAB1_0800	20.5406	19.7632	21.6433	21.1042	19.5391	20.0812	6	18.7602	19.3928	18.7037	19.5716	19.2567	19.1546	6	+	+	110.95	68205000	27	2.33042	1.30532	0.0046728
178	F2HZ24	Family 1 extracellular solute-binding protein	BM28_B0713	24.0893	24.5489	24.1563	24.3348	24.1242	23.8266	6	23.2279	22.7327	22.8079	22.709	22.8001	23.0012	6	+	+	323.31	663460000	239	5.84649	1.30018	1.42401e-06
179	Q2YP66	Zinc-containing alcohol dehydrogenase superfamily:Zinc-containing alcohol dehydrogenase (EC 1.1.1.1)	BAB1_0204	27.5968	28.7903	27.9065	28.376	29.0366	29.399	6	27.1095	27.2028	27.3342	27.0834	27.4668	27.1272	6	+	+	323.31	12537000000	617	2.95169	1.2969	0.00111766
180	Q2YRB8	Oxidoreductase, N-terminal:Oxidoreductase, C-terminal	BAB1_1617	20.4298	18.9413	20.5301	19.9045	18.7149	18.2973	6	18.0106	18.3383	18.0181	18.0989	18.0996	18.566	6	+	+	136.4	46280000	27	2.04957	1.2811	0.00892126
181	F2HW06	Sec-independent protein translocase protein TatA	tatA BM28_A0889	21.3027	23.5715	21.6847	22.0602	22.5103	22.6737	6	20.8095	20.9193	21.4816	20.814	21.1531	21.0526	6	+	+	33.355	170980000	48	2.36124	1.26217	0.00435273
182	Q2YRU5	MotY protein:Bacterial outer membrane protein:OmpA/MotB domain	BAB1_1226	22.2572	22.2109	21.6358	21.829	21.8298	21.4273	6	20.8597	20.8345	20.5963	20.4069	20.3771	20.5558	6	+	+	264.05	151780000	64	4.96195	1.25995	1.09158e-05
183	Q2YR15	ParB-like nuclease:ParB-like partition protein	BAB1_2059	21.5575	20.1857	21.8386	21.6518	20.5118	20.067	6	19.6026	19.4317	20.1279	19.5859	19.7357	19.7921	6	+	+	35.677	115820000	48	2.37335	1.25608	0.00423298
184	F2HZ90	ABC transporter periplasmic substrate-binding protein	BM28_B0779	20.7103	20.32	21.3177	21.3423	20.2137	20.0908	6	19.1529	19.7941	19.256	19.4026	19.5327	19.6646	6	+	+	17.612	74616000	16	3.16924	1.19866	0.000677273
185	Q2YRV5	Tetracycline resistance protein TetB	BAB1_1216	27.8895	29.6254	27.5408	28.3633	28.8404	29.2918	6	27.777	27.5887	27.8647	27.3598	27.4118	26.4512	6	+	+	323.31	20184000000	990	1.89897	1.18304	0.0126191
186	Q2YNL2	Aspartyl/glutamyl-tRNA(Asn/Gln) amidotransferase subunit B (Asp/Glu-ADT subunit B) (EC 6.3.5.-)	gatB BAB1_0918	22.6047	22.7409	22.6436	22.6378	22.3652	21.9604	6	21.4459	21.1902	21.3182	21.1562	21.1417	21.6358	6	+	+	316.25	271000000	142	5.05483	1.17744	8.8139e-06
187	Q2YLU8	Hydroxyacylglutathione hydrolase (EC 3.1.2.6) (Glyoxalase II) (Glx II)	gloB BAB1_1936	21.3787	20.7191	21.7569	20.5442	20.0837	19.7562	6	19.9511	18.9929	19.247	19.895	19.6254	19.5627	6	+	+	96.086	97235000	59	2.14704	1.16079	0.0071279
188	Q2YR81	Histidinol-phosphate aminotransferase (EC 2.6.1.9) (Imidazole acetol-phosphate transaminase)	hisC BAB1_1988	20.5601	19.8202	21.2733	20.7211	19.5845	19.7958	6	18.8701	19.2012	19.204	19.0516	18.9756	19.5459	6	+	+	34.485	61456000	19	2.60796	1.15114	0.00246628
189	Q2YPV4	Biotin/lipoyl attachment:2-oxo acid dehydrogenase, acyltransferase component, lipoyl-binding:Transketolase, central region:Tr (EC 1.2.4.1)	BAB1_1151	23.888	23.224	24.0704	23.428	22.8828	22.3827	6	22.21	22.2548	21.9929	22.1001	22.0895	22.3951	6	+	+	289.36	559570000	131	2.8251	1.13891	0.00149588
190	F2HRD9	UspA domain-containing protein	BM28_A1058	24.8633	23.1729	24.9867	23.6035	23.4134	23.0668	6	22.8197	22.6211	22.2743	22.7918	22.7285	23.1664	6	+	+	253.89	810610000	225	1.90152	1.11746	0.0125453
191	Q2YNM1	Immunogenic membrane protein YajC	yajC BAB1_0909	21.8805	22.0745	22.2191	21.3158	21.4929	21.8309	6	20.9288	21.1022	20.7888	20.6549	20.4791	20.4138	6	+	+	32.611	159830000	48	3.92436	1.07435	0.000119027
192	Q2YLI5	ATP synthase subunit alpha (EC 3.6.3.14) (ATP synthase F1 sector subunit alpha) (F-ATPase subunit alpha)	atpA BAB1_1809	23.7717	22.6082	23.9308	23.7066	22.4411	22.0444	6	21.7141	21.9752	22.2187	22.0312	22.0053	22.1267	6	+	+	323.31	655800000	198	1.99578	1.07194	0.0100976
193	Q2YPU8	CTP synthase (EC 6.3.4.2) (CTP synthetase) (UTP--ammonia ligase)	pyrG BAB1_1157	21.068	22.308	22.3907	22.0047	21.5264	21.2809	6	20.6213	21.1722	20.8778	20.5442	20.65	20.3373	6	+	+	42.091	170610000	56	2.72322	1.06262	0.00189138
194	F2HWQ0	Oligoendopeptidase, pepF/M3 family protein	BM28_B0084	22.4611	21.3167	22.2094	21.2687	20.6231	20.1974	6	20.2861	20.4219	19.8676	20.1952	20.2587	20.7326	6	+	+	50.221	132410000	33	1.72561	1.05239	0.0188101
195	Q2YRP0	Bacterial regulatory proteins, AsnC family	lrp-1 BAB1_1521	22.8345	22.9323	23.3209	23.0958	22.8937	22.7199	6	21.9156	22.0593	21.8549	21.9571	21.6998	22.0426	6	+	+	77.854	367690000	108	5.87202	1.04463	1.34272e-06
196	Q2YKN7	Uncharacterized protein	BAB2_0620	22.1645	23.9858	22.4475	22.6092	22.7691	23.7402	6	21.4591	21.564	21.8777	22.1251	22.1684	22.2736	6	+	+	204.61	633440000	94	1.98369	1.0414	0.0103826
197	F2HUR6	DNA gyrase subunit B (EC 5.99.1.3)	gyrB BM28_A0133	21.6239	19.7108	21.2661	21.3387	20.1089	19.6736	6	19.7793	19.5777	19.9466	19.4291	19.1359	19.6451	6	+	+	83.303	82361000	38	1.67049	1.03469	0.0213554
198	Q2YQC0	Uncharacterized protein	BAB1_1641	25.7445	27.4238	25.3486	26.3255	26.8646	27.3827	6	25.522	25.1611	25.6409	25.1365	25.8196	25.674	6	+	+	189.91	3771100000	216	1.70317	1.02262	0.0198073
199	Q2YKG1	Bacterial extracellular solute-binding protein, family 5	BAB2_0699	26.1707	25.5741	26.5437	26.0184	25.6369	25.5205	6	24.9416	24.7643	24.9671	24.6964	25.0233	24.9428	6	+	+	323.31	7309100000	820	3.81387	1.02146	0.000153509
200	Q2YRR5	Anthranilate phosphoribosyltransferase (EC 2.4.2.18)	trpD BAB1_1163	20.7085	19.8194	21.0831	20.714	19.5249	18.9554	6	19.0651	19.1429	19.122	19.1607	19.0346	19.1876	6	+	+	22.246	60202000	20	1.87261	1.01539	0.0134088
201	Q2YRJ0	ATP/GTP-binding site motif A (P-loop)	BAB1_1186	23.474	24.3791	23.3691	23.7157	24.1899	23.86	6	22.8238	22.9028	22.8997	22.8981	22.6537	22.7906	6	+	+	153.56	529360000	166	3.89341	1.00314	0.000127817
202	Q2YQR0	Enoyl-[acyl-carrier-protein] reductase [NADH] (EC 1.3.1.9)	fabI-2 BAB1_2172	21.6694	19.6633	21.2027	20.498	20.38	20.2992	6	19.0915	19.2914	19.3466	19.9728	19.6147	20.4131	6	+	+	123.55	94345000	40	1.74187	0.9971	0.0181188
203	Q2YQ16	Acetyl-CoA hydrolase/transferase	BAB1_1077	23.1103	21.4658	22.4213	21.9519	21.831	21.749	6	21.318	20.0767	20.8149	21.6406	21.4338	21.2699	6	+	+	42.956	208960000	61	1.85979	0.99594	0.0138105
204	F2HYV3	Aldehyde dehydrogenase	BM28_B0642	24.8041	24.5638	25.6216	24.9648	24.5485	24.0955	6	23.7805	23.8888	23.7094	23.6876	23.9015	23.7966	6	+	+	323.31	1196400000	316	2.99767	0.972319	0.00100537
205	Q2YLN2	Glutaredoxin:Thioredoxin type domain	grxC BAB1_1879	22.4711	23.477	22.904	22.463	23.4621	23.192	6	22.3185	22.031	22.2295	21.8798	21.8608	22.0519	6	+	+	183.39	449590000	116	3.02145	0.932945	0.000951809
206	Q2YJM1	Peptide methionine sulfoxide reductase MsrA (Protein-methionine-S-oxide reductase) (EC 1.8.4.11) (Peptide-methionine (S)-S-oxide reductase) (Peptide Met(O) reductase)	msrA BAB2_1029	19.6631	19.0878	20.2144	19.7543	18.9382	18.7556	6	18.2673	18.6826	18.384	18.3568	18.393	18.8472	6	+	+	58.622	37627000	32	2.38137	0.913768	0.0041556
207	F2HSE5	Malonyl CoA-acyl carrier protein transacylase (EC 2.3.1.39)	fabD BM28_A0477	22.0697	20.9229	22.3161	21.5762	21.0408	20.6667	6	20.4789	20.3161	20.3773	20.708	20.3241	20.9895	6	+	+	200.25	155200000	66	1.93241	0.89977	0.0116838
208	Q2YKX5	Bacterial periplasmic spermidine/putrescine-binding protein:Gliadin, alpha/beta:Bacterial extracellular solute-binding protei	BAB2_0519	24.7857	25.7927	24.7567	25.3252	25.8362	26.0024	6	24.5459	24.2145	24.8924	24.2045	24.7868	24.4973	6	+	+	323.31	1938400000	390	2.27272	0.892929	0.00533681
209	Q2YKC2	Uncharacterized protein	BAB2_0740	19.7941	21.455	20.7304	20.8913	20.3585	20.0542	6	19.6219	19.6356	19.8155	19.8395	19.6743	19.3474	6	+	+	60.37	70070000	20	2.2218	0.891572	0.00600063
210	F2HX69	Isoleucine--tRNA ligase (EC 6.1.1.5) (Isoleucyl-tRNA synthetase)	ileS BM28_B0195	20.9098	21.8554	20.7489	21.1302	20.7711	20.5433	6	19.8127	20.4089	20.2699	20.2442	19.9468	20.0688	6	+	+	108.36	122460000	62	2.68506	0.86789	0.0020651
211	F2HQX7	Thiamine transporter substrate binding subunit	tbpA BM28_A1756	25.7169	27.3446	25.6255	26.3163	26.973	26.9239	6	25.7025	25.4158	25.7741	25.5439	25.7463	25.5186	6	+	+	323.31	3091000000	547	1.81966	0.866488	0.0151476
212	Q2YRQ8	Citrate synthase (EC 2.3.3.16)	gltA BAB1_1170	22.9003	22.176	22.6867	22.5651	22.1486	21.7008	6	21.5955	21.6639	21.2925	21.2648	21.5494	21.7651	6	+	+	277.83	323360000	129	2.79336	0.841035	0.00160931
213	Q2YIW0	30S ribosomal protein S21	rpsU BAB2_0269	21.1317	21.0196	21.6621	22.1333	21.5363	21.1323	6	20.2855	20.5078	20.8071	20.8457	20.7817	20.356	6	+	+	52.677	151060000	70	2.72236	0.838593	0.00189513
214	Q2YMR3	Transcriptional regulatory protein MucR	BAB1_0594	25.1365	24.4493	25.1174	24.4782	24.5927	24.0403	6	23.5686	24.0355	24.3494	23.5606	23.3644	24.0367	6	+	+	323.31	1064400000	154	2.2597	0.816544	0.00549923
215	Q2YNW9	Dihydroxy-acid dehydratase (DAD) (EC 4.2.1.9)	ilvD BAB1_0096	21.5681	22.5744	21.918	21.6804	22.2611	21.8472	6	21.3947	21.5031	21.4571	20.694	21.2739	20.7804	6	+	+	225.39	178430000	94	2.41197	0.790997	0.00387281
216	Q2YNP2	Biotin/lipoyl attachment:Acetyl-CoA biotin carboxyl carrier:Biotin-requiring enzyme, attachment site	accB BAB1_0925	24.0727	23.8164	23.6143	23.6836	23.409	22.8181	6	23.3102	22.0789	23.4223	22.8501	22.6487	22.4237	6	+	+	78.101	591240000	77	1.76032	0.780011	0.017365
217	Q2YKJ4	Uncharacterized protein	BAB2_0665	24.169	24.1521	24.3258	24.3128	24.4979	24.4327	6	23.8713	23.138	22.7474	23.2843	24.2725	24.1023	6	+	+	109.1	1075100000	125	1.84302	0.745753	0.0143542
218	F2HS59	Histidine triad protein	BM28_A1175	22.0837	21.8654	22.1202	21.7962	21.4776	21.3152	6	21.0834	21.2829	20.9479	20.9512	21.0521	20.9967	6	+	+	42.165	177870000	96	3.34234	0.724017	0.000454629
219	Q2YM23	GatB/Yqey	BAB1_1501	20.3816	21.3943	20.2004	21.1486	20.3263	20.0277	6	20.2296	19.7976	20.1426	19.3488	19.8234	19.9028	6	+	+	40.105	74363000	29	1.66448	0.705665	0.0216533
220	Q2YP08	Heat shock protein Hsp20	BAB1_0162	23.6543	23.2866	24.0705	23.3664	23.107	22.5375	6	22.5234	22.7516	22.7481	22.758	22.7413	22.7596	6	+	+	150.62	480920000	112	1.80705	0.623375	0.0155938
221	Q2YNE1	N-acetyl-gamma-glutamyl-phosphate reductase (AGPR) (EC 1.2.1.38) (N-acetyl-glutamate semialdehyde dehydrogenase) (NAGSA dehydrogenase)	argC BAB1_0808	20.515	19.6867	19.8731	19.9608	19.7916	19.2613	6	19.1878	18.9494	19.5239	19.0533	19.3509	19.6332	6	+	+	18.199	49331000	23	1.75344	0.565004	0.0176423
222	Q2YPU9	2-dehydro-3-deoxyphosphooctonate aldolase (EC 2.5.1.55) (3-deoxy-D-manno-octulosonic acid 8-phosphate synthase) (KDO-8-phosphate synthase) (KDO 8-P synthase) (KDOPS) (Phospho-2-dehydro-3-deoxyoctonate aldolase)	kdsA BAB1_1156	22.9229	22.9974	23.2061	22.6383	22.4535	22.2077	6	22.5976	22.1715	21.9191	22.164	21.8417	22.3885	6	+	+	323.31	327740000	107	1.81462	0.557273	0.0153244
223	Q2YK03	Bacterial extracellular solute-binding protein, family 1	BAB2_0879	22.3643	22.158	22.5397	22.672	22.202	22.2418	6	21.8741	21.6333	21.6581	21.8285	22.0023	21.8846	6	+	+	117.94	388750000	127	3.52086	0.549453	0.000301398
224	Q2YR85	Diaminopimelate decarboxylase (DAP decarboxylase) (DAPDC) (EC 4.1.1.20)	lysA BAB1_1984	20.7728	21.4308	20.6871	21.266	21.0695	21.3351	6	20.7003	20.9285	20.511	20.4407	20.4733	20.2676	6	+	+	63.581	101210000	52	2.20483	0.539949	0.00623972
225	Q2YK26	Peptidase family T4	BAB2_0854	20.1226	20.8626	20.2836	20.3569	20.8569	20.6255	6	19.9284	19.9617	19.7612	20.1262	20.0367	20.1287	6	+	+	56.528	81920000	58	2.45535	0.527549	0.00350466
226	Q2YQ07	Threonine--tRNA ligase (EC 6.1.1.3) (Threonyl-tRNA synthetase) (ThrRS)	thrS BAB1_1093	20.1398	20.6371	20.4471	20.6115	20.2544	20.1893	6	20.079	19.6894	19.9518	19.7055	19.9802	19.9053	6	+	+	50.117	70040000	42	2.96922	0.494663	0.00107345
